# Supplementary material for: Genome-Wide DNA Methylation Patterns in Persistent Attention-Deficit/Hyperactivity Disorder and in Association With Impulsive and Callous Traits
Source: Front Genet. 2020 Jan 31;11:16. doi: 10.3389/fgene.2020.00016 (PMC7005250; doi:10.3389/fgene.2020.00016)
Supplement: Supplementary file 2 [file Table_3.xlsx]

## Sheet: APOB
Timepoint	SNP	SNP Chr	SNP Pos	A1	A2	MAF	CpG	CpG Chr	CpG Pos	beta	t-stat	Effect Size	p-value
Adolescence	rs1820914	2	21402957	T	C	0.185	cg16306978	2	21266953	0.45633	8.27344	0.0398	5.12e-16
Adolescence	rs113156606	2	21414638	C	T	0.185	cg16306978	2	21266953	0.45633	8.27344	0.0398	5.12e-16
Adolescence	rs10166647	2	21460176	C	T	0.408	cg16723488	2	21266947	0.35644	8.26764	0.02784	5.36e-16
Adolescence	rs1820914	2	21402957	T	C	0.185	cg25123895	2	21267113	0.45222	8.26743	0.02758	5.36e-16
Adolescence	rs113156606	2	21414638	C	T	0.185	cg25123895	2	21267113	0.45222	8.26743	0.02758	5.36e-16
Adolescence	rs76935526	2	21386353	T	C	0.184	cg03350299	2	21266960	0.44944	8.25706	0.00968	5.81e-16
Adolescence	rs79524936	2	21389323	C	T	0.184	cg03350299	2	21266960	0.44944	8.25706	0.00968	5.81e-16
Adolescence	rs56143640	2	21476301	G	A	0.312	cg16723488	2	21266947	0.37535	8.25136	0.03218	6.08e-16
Adolescence	rs181436666	2	21317969	T	C	0.265	cg24309555	2	21266956	0.39314	8.24763	0.00754	6.25e-16
Adolescence	rs76889510	2	21415466	A	G	0.184	cg16306978	2	21266953	0.45518	8.24211	0.03966	6.53e-16
Adolescence	rs386397	2	21451827	A	G	0.306	cg00673290	2	21266727	0.38278	8.24161	0.03255	6.55e-16
Adolescence	rs1713223	2	21271270	A	C	0.498	cg25123895	2	21267113	-0.35033	-8.23083	0.01762	7.12e-16
Adolescence	rs531819	2	21263639	T	G	0.139	cg03350299	2	21266960	-0.49313	-8.20839	0.00985	8.47e-16
Adolescence	rs1800481	2	21267210	A	G	0.139	cg03350299	2	21266960	-0.49313	-8.20839	0.00985	8.47e-16
Adolescence	rs585967	2	21270554	A	C	0.139	cg03350299	2	21266960	-0.49313	-8.20839	0.00985	8.47e-16
Adolescence	rs1713222	2	21271323	A	G	0.139	cg03350299	2	21266960	-0.49313	-8.20839	0.00985	8.47e-16
Adolescence	rs35239705	2	21451687	A	G	0.174	cg03350299	2	21266960	-0.45723	-8.20053	0.00725	8.99e-16
Adolescence	rs79192207	2	21417897	C	G	0.18	cg16723488	2	21266947	0.4599	8.20028	0.04219	9.01e-16
Adolescence	rs312945	2	21328825	A	G	0.286	cg16306978	2	21266953	-0.38349	-8.19949	0.0422	9.07e-16
Adolescence	rs56232451	2	21424673	G	C	0.185	cg16306978	2	21266953	0.45074	8.19929	0.0386	9.08e-16
Adolescence	rs201580360	2	21382103	I	R	0.228	cg03350299	2	21266960	-0.41186	-8.196	0.00991	9.31e-16
Adolescence	rs56232451	2	21424673	G	C	0.185	cg25123895	2	21267113	0.44667	8.19311	0.02666	9.52e-16
Adolescence	rs76889510	2	21415466	A	G	0.184	cg25123895	2	21267113	0.44883	8.19173	0.02721	9.62e-16
Adolescence	rs57289321	2	21428937	D	R	0.195	cg24309555	2	21266956	0.4348	8.18736	0.00907	9.95e-16
Adolescence	rs148134238	2	21438682	D	R	0.185	cg24309555	2	21266956	0.44479	8.18623	0.00907	1e-15
Adolescence	rs10577088	2	21310264	D	R	0.479	cg15246511	2	21267212	-0.33647	-8.17189	0.04203	1.12e-15
Adolescence	rs675430	2	21311785	C	A	0.479	cg15246511	2	21267212	-0.33647	-8.17189	0.04203	1.12e-15
Adolescence	rs563476	2	21313676	T	C	0.479	cg15246511	2	21267212	-0.33647	-8.17189	0.04203	1.12e-15
Adolescence	rs97458	2	21327635	G	A	0.287	cg16306978	2	21266953	-0.38215	-8.16476	0.04178	1.18e-15
Adolescence	rs57289321	2	21428937	D	R	0.195	cg25123895	2	21267113	0.43518	8.16447	0.02692	1.19e-15
Adolescence	rs12714264	2	21265518	T	A	0.12	cg03350299	2	21266960	-0.52275	-8.1621	0.01046	1.21e-15
Adolescence	rs312031	2	21471649	A	G	0.315	cg25071744	2	21266995	0.35612	8.16088	0.01885	1.22e-15
Adolescence	rs386397	2	21451827	A	G	0.306	cg25071744	2	21266995	0.36301	8.15763	0.01931	1.25e-15
Adolescence	rs142614082	2	21436451	A	G	0.186	cg24309555	2	21266956	0.44262	8.14742	0.00905	1.35e-15
Adolescence	rs11901649	2	21250223	A	G	0.437	cg25123895	2	21267113	0.34974	8.14695	0.02736	1.36e-15
Adolescence	rs312049	2	21475944	C	T	0.406	cg16723488	2	21266947	0.35162	8.14605	0.02779	1.37e-15
Adolescence	rs10199768	2	21244000	T	G	0.442	cg25123895	2	21267113	0.34894	8.14529	0.02669	1.37e-15
Adolescence	rs79192207	2	21417897	C	G	0.18	cg03350299	2	21266960	0.45047	8.14106	0.008	1.42e-15
Adolescence	rs312046	2	21474487	T	C	0.316	cg25071744	2	21266995	0.35554	8.13626	0.0191	1.47e-15
Adolescence	rs181436666	2	21317969	T	C	0.265	cg03350299	2	21266960	0.38691	8.13308	0.0057	1.51e-15
Adolescence	rs145286195	2	21289490	D	R	0.477	cg15246511	2	21267212	-0.33382	-8.13078	0.04203	1.54e-15
Adolescence	rs594677	2	21293006	T	C	0.477	cg15246511	2	21267212	-0.33382	-8.13078	0.04203	1.54e-15
Adolescence	rs75014690	2	21396363	C	T	0.185	cg16723488	2	21266947	0.44822	8.1264	0.03693	1.59e-15
Adolescence	rs78003123	2	21401970	G	A	0.185	cg16723488	2	21266947	0.44822	8.1264	0.03693	1.59e-15
Adolescence	rs57305952	2	21403438	G	A	0.185	cg16723488	2	21266947	0.44822	8.1264	0.03693	1.59e-15
Adolescence	rs634292	2	21279909	T	G	0.477	cg15246511	2	21267212	-0.3343	-8.12207	0.04228	1.64e-15
Adolescence	rs666126	2	21282435	G	A	0.477	cg15246511	2	21267212	-0.3343	-8.12207	0.04228	1.64e-15
Adolescence	rs571468	2	21293914	C	A	0.476	cg15246511	2	21267212	-0.33388	-8.12026	0.0418	1.66e-15
Adolescence	rs7605304	2	21445569	A	G	0.189	cg24309555	2	21266956	0.43661	8.11645	0.0087	1.71e-15
Adolescence	rs75429038	2	21445743	C	T	0.189	cg24309555	2	21266956	0.43661	8.11645	0.0087	1.71e-15
Adolescence	rs13412147	2	21448887	T	C	0.189	cg24309555	2	21266956	0.43661	8.11645	0.0087	1.71e-15
Adolescence	rs140053693	2	21449278	D	R	0.189	cg24309555	2	21266956	0.43661	8.11645	0.0087	1.71e-15
Adolescence	rs1079457	2	21449498	G	C	0.189	cg24309555	2	21266956	0.43661	8.11645	0.0087	1.71e-15
Adolescence	rs12720816	2	21239667	C	T	0.394	cg24309555	2	21266956	0.35239	8.11442	0.00675	1.74e-15
Adolescence	rs201580360	2	21382103	I	R	0.228	cg25071744	2	21266995	-0.39688	-8.10914	0.02448	1.81e-15
Adolescence	rs312026	2	21459587	C	G	0.312	cg25071744	2	21266995	0.35634	8.10737	0.02047	1.84e-15
Adolescence	rs547186	2	21269241	A	T	0.497	cg25123895	2	21267113	-0.34412	-8.10495	0.01745	1.87e-15
Adolescence	rs62133387	2	21410890	T	C	0.24	cg16306978	2	21266953	-0.39813	-8.10369	0.0288	1.89e-15
Adolescence	rs76520886	2	21427969	G	A	0.186	cg16306978	2	21266953	0.44503	8.09547	0.03848	2.01e-15
Adolescence	rs148134238	2	21438682	D	R	0.185	cg25123895	2	21267113	0.44132	8.0872	0.02698	2.14e-15
Adolescence	rs7566040	2	21454424	G	T	0.405	cg16723488	2	21266947	0.35029	8.08368	0.02756	2.2e-15
Adolescence	rs1469513	2	21259562	C	T	0.435	cg07636176	2	21267175	0.33584	8.07812	0.04755	2.29e-15
Adolescence	rs148134238	2	21438682	D	R	0.185	cg16306978	2	21266953	0.44424	8.07162	0.04049	2.41e-15
Adolescence	rs664894	2	21297177	A	T	0.477	cg15246511	2	21267212	-0.33173	-8.06651	0.0417	2.51e-15
Adolescence	rs565202	2	21297447	G	A	0.477	cg15246511	2	21267212	-0.33173	-8.06651	0.0417	2.51e-15
Adolescence	rs486936	2	21302824	T	C	0.477	cg15246511	2	21267212	-0.33173	-8.06651	0.0417	2.51e-15
Adolescence	rs666416	2	21304147	A	G	0.477	cg15246511	2	21267212	-0.33173	-8.06651	0.0417	2.51e-15
Adolescence	rs12720816	2	21239667	C	T	0.394	cg25071744	2	21266995	0.33986	8.06176	0.01747	2.6e-15
Adolescence	rs76520886	2	21427969	G	A	0.186	cg16723488	2	21266947	0.44254	8.05406	0.0322	2.75e-15
Adolescence	rs386397	2	21451827	A	G	0.306	cg16306978	2	21266953	0.3738	8.04639	0.03255	2.92e-15
Adolescence	rs201580360	2	21382103	I	R	0.228	cg24309555	2	21266956	-0.40601	-8.04414	0.00854	2.97e-15
Adolescence	rs76520886	2	21427969	G	A	0.186	cg25123895	2	21267113	0.4387	8.04368	0.02666	2.98e-15
Adolescence	rs10181679	2	21463518	A	C	0.311	cg25071744	2	21266995	0.35301	8.03515	0.02022	3.18e-15
Adolescence	rs312043	2	21464421	A	G	0.311	cg25071744	2	21266995	0.35301	8.03515	0.02022	3.18e-15
Adolescence	rs312042	2	21464498	G	A	0.311	cg25071744	2	21266995	0.35301	8.03515	0.02022	3.18e-15
Adolescence	rs12720816	2	21239667	C	T	0.394	cg16306978	2	21266953	0.35312	8.02931	0.03093	3.32e-15
Adolescence	rs13393101	2	21430401	C	T	0.189	cg24309555	2	21266956	0.43216	8.0274	0.0087	3.37e-15
Adolescence	rs541041	2	21294975	G	A	0.167	cg00673290	2	21266727	-0.45571	-8.02739	0.04324	3.37e-15
Adolescence	rs13423380	2	21351326	T	C	0.127	cg16723488	2	21266947	-0.50688	-8.01846	0.04051	3.61e-15
Adolescence	rs531819	2	21263639	T	G	0.139	cg25071744	2	21266995	-0.46923	-8.01147	0.02818	3.8e-15
Adolescence	rs1800481	2	21267210	A	G	0.139	cg25071744	2	21266995	-0.46923	-8.01147	0.02818	3.8e-15
Adolescence	rs585967	2	21270554	A	C	0.139	cg25071744	2	21266995	-0.46923	-8.01147	0.02818	3.8e-15
Adolescence	rs1713222	2	21271323	A	G	0.139	cg25071744	2	21266995	-0.46923	-8.01147	0.02818	3.8e-15
Adolescence	rs10199768	2	21244000	T	G	0.442	cg03350299	2	21266960	0.34132	8.00961	0.00707	3.86e-15
Adolescence	rs1820914	2	21402957	T	C	0.185	cg16723488	2	21266947	0.4424	8.00853	0.03691	3.89e-15
Adolescence	rs113156606	2	21414638	C	T	0.185	cg16723488	2	21266947	0.4424	8.00853	0.03691	3.89e-15
Adolescence	rs56232451	2	21424673	G	C	0.185	cg16723488	2	21266947	0.44027	8.00143	0.03217	4.1e-15
Adolescence	rs142614082	2	21436451	A	G	0.186	cg16306978	2	21266953	0.44043	8.00118	0.04035	4.11e-15
Adolescence	rs75014690	2	21396363	C	T	0.185	cg03350299	2	21266960	0.4356	7.99983	0.00645	4.15e-15
Adolescence	rs78003123	2	21401970	G	A	0.185	cg03350299	2	21266960	0.4356	7.99983	0.00645	4.15e-15
Adolescence	rs57305952	2	21403438	G	A	0.185	cg03350299	2	21266960	0.4356	7.99983	0.00645	4.15e-15
Adolescence	rs66774912	2	21423532	A	G	0.125	cg25071744	2	21266995	-0.48712	-7.99742	0.02381	4.23e-15
Adolescence	rs57289321	2	21428937	D	R	0.195	cg16306978	2	21266953	0.43037	7.99491	0.03841	4.31e-15
Adolescence	rs76889510	2	21415466	A	G	0.184	cg16723488	2	21266947	0.44206	7.99352	0.03688	4.35e-15
Adolescence	rs515135	2	21286057	T	C	0.166	cg00673290	2	21266727	-0.45422	-7.99319	0.04348	4.36e-15
Adolescence	rs563290	2	21288226	G	A	0.166	cg00673290	2	21266727	-0.45422	-7.99319	0.04348	4.36e-15
Adolescence	rs562338	2	21288321	A	G	0.166	cg00673290	2	21266727	-0.45422	-7.99319	0.04348	4.36e-15
Adolescence	rs581411	2	21289432	G	A	0.166	cg00673290	2	21266727	-0.45422	-7.99319	0.04348	4.36e-15
Adolescence	rs580889	2	21290067	C	T	0.166	cg00673290	2	21266727	-0.45422	-7.99319	0.04348	4.36e-15
Adolescence	rs548145	2	21291312	T	C	0.166	cg00673290	2	21266727	-0.45422	-7.99319	0.04348	4.36e-15
Adolescence	rs668948	2	21291529	G	A	0.166	cg00673290	2	21266727	-0.45422	-7.99319	0.04348	4.36e-15
Adolescence	rs201027918	2	21293334	I	R	0.166	cg00673290	2	21266727	-0.45422	-7.99319	0.04348	4.36e-15
Adolescence	rs148134238	2	21438682	D	R	0.185	cg03350299	2	21266960	0.43287	7.97593	0.00797	4.97e-15
Adolescence	rs79192207	2	21417897	C	G	0.18	cg25071744	2	21266995	0.4301	7.97515	0.03208	5e-15
Adolescence	rs531819	2	21263639	T	G	0.139	cg24309555	2	21266956	-0.48143	-7.97265	0.00946	5.09e-15
Adolescence	rs1800481	2	21267210	A	G	0.139	cg24309555	2	21266956	-0.48143	-7.97265	0.00946	5.09e-15
Adolescence	rs585967	2	21270554	A	C	0.139	cg24309555	2	21266956	-0.48143	-7.97265	0.00946	5.09e-15
Adolescence	rs1713222	2	21271323	A	G	0.139	cg24309555	2	21266956	-0.48143	-7.97265	0.00946	5.09e-15
Adolescence	rs144545816	2	21413077	A	G	0.287	cg16306978	2	21266953	0.37545	7.96787	0.03542	5.28e-15
Adolescence	rs200657767	2	21414642	I	R	0.287	cg16306978	2	21266953	0.37545	7.96787	0.03542	5.28e-15
Adolescence	rs75014690	2	21396363	C	T	0.185	cg25071744	2	21266995	0.42232	7.96714	0.02416	5.31e-15
Adolescence	rs78003123	2	21401970	G	A	0.185	cg25071744	2	21266995	0.42232	7.96714	0.02416	5.31e-15
Adolescence	rs57305952	2	21403438	G	A	0.185	cg25071744	2	21266995	0.42232	7.96714	0.02416	5.31e-15
Adolescence	rs1820914	2	21402957	T	C	0.185	cg03350299	2	21266960	0.43412	7.96632	0.00645	5.34e-15
Adolescence	rs113156606	2	21414638	C	T	0.185	cg03350299	2	21266960	0.43412	7.96632	0.00645	5.34e-15
Adolescence	rs520861	2	21387239	A	G	0.228	cg16306978	2	21266953	-0.3989	-7.96585	0.02977	5.36e-15
Adolescence	rs1712249	2	21385974	T	C	0.226	cg16306978	2	21266953	-0.40012	-7.95904	0.02892	5.64e-15
Adolescence	rs148134238	2	21438682	D	R	0.185	cg16723488	2	21266947	0.43808	7.95848	0.04163	5.67e-15
Adolescence	rs144286714	2	21412151	T	G	0.174	cg25123895	2	21267113	0.44612	7.95634	0.02721	5.76e-15
Adolescence	rs367162	2	21444779	C	T	0.161	cg16306978	2	21266953	-0.46715	-7.95139	0.04171	5.98e-15
Adolescence	rs380240	2	21446653	T	C	0.161	cg16306978	2	21266953	-0.46715	-7.95139	0.04171	5.98e-15
Adolescence	rs403880	2	21449408	T	C	0.161	cg16306978	2	21266953	-0.46739	-7.94899	0.04167	6.09e-15
Adolescence	rs432483	2	21450349	G	C	0.161	cg16306978	2	21266953	-0.46739	-7.94899	0.04167	6.09e-15
Adolescence	rs431493	2	21450824	G	C	0.161	cg16306978	2	21266953	-0.46739	-7.94899	0.04167	6.09e-15
Adolescence	rs386397	2	21451827	A	G	0.306	cg24309555	2	21266956	0.36524	7.94864	0.00617	6.1e-15
Adolescence	rs1469513	2	21259562	C	T	0.435	cg16723488	2	21266947	0.34415	7.94536	0.0277	6.25e-15
Adolescence	rs142614082	2	21436451	A	G	0.186	cg03350299	2	21266960	0.4309	7.94098	0.00797	6.46e-15
Adolescence	rs312046	2	21474487	T	C	0.316	cg00673290	2	21266727	0.36297	7.93834	0.03034	6.59e-15
Adolescence	rs5829778	2	21423218	I	R	0.283	cg16306978	2	21266953	-0.37285	-7.93648	0.03781	6.68e-15
Adolescence	rs76889510	2	21415466	A	G	0.184	cg03350299	2	21266960	0.433	7.93605	0.00645	6.71e-15
Adolescence	rs11127270	2	21277786	A	G	0.475	cg15246511	2	21267212	-0.32726	-7.93543	0.04252	6.74e-15
Adolescence	rs428696	2	21448607	T	C	0.161	cg16306978	2	21266953	-0.46865	-7.93305	0.03878	6.86e-15
Adolescence	rs56232451	2	21424673	G	C	0.185	cg03350299	2	21266960	0.43066	7.93221	0.00568	6.9e-15
Adolescence	rs638988	2	21435271	G	C	0.159	cg03350299	2	21266960	-0.46452	-7.93073	0.00797	6.98e-15
Adolescence	rs139106085	2	21435700	A	C	0.159	cg03350299	2	21266960	-0.46452	-7.93073	0.00797	6.98e-15
Adolescence	rs441169	2	21437028	G	T	0.159	cg03350299	2	21266960	-0.46452	-7.93073	0.00797	6.98e-15
Adolescence	rs312051	2	21429055	C	G	0.161	cg16306978	2	21266953	-0.46829	-7.92641	0.03878	7.21e-15
Adolescence	rs365946	2	21439329	T	G	0.16	cg16306978	2	21266953	-0.46829	-7.92641	0.03878	7.21e-15
Adolescence	rs142614082	2	21436451	A	G	0.186	cg16723488	2	21266947	0.43601	7.92222	0.04161	7.44e-15
Adolescence	rs142614082	2	21436451	A	G	0.186	cg25123895	2	21267113	0.4327	7.92123	0.02692	7.49e-15
Adolescence	rs521685	2	21401631	C	T	0.229	cg16306978	2	21266953	-0.39675	-7.92075	0.03004	7.52e-15
Adolescence	rs521755	2	21401700	G	A	0.229	cg16306978	2	21266953	-0.39675	-7.92075	0.03004	7.52e-15
Adolescence	rs522761	2	21401789	T	C	0.229	cg16306978	2	21266953	-0.39675	-7.92075	0.03004	7.52e-15
Adolescence	rs522661	2	21401801	G	A	0.229	cg16306978	2	21266953	-0.39675	-7.92075	0.03004	7.52e-15
Adolescence	rs200796611	2	21401902	I	R	0.229	cg16306978	2	21266953	-0.39675	-7.92075	0.03004	7.52e-15
Adolescence	rs10166647	2	21460176	C	T	0.408	cg25071744	2	21266995	0.32871	7.91989	0.01998	7.57e-15
Adolescence	rs76520886	2	21427969	G	A	0.186	cg03350299	2	21266960	0.42963	7.91988	0.00566	7.57e-15
Adolescence	rs76889510	2	21415466	A	G	0.184	cg25071744	2	21266995	0.42019	7.91171	0.02416	8.05e-15
Adolescence	rs11901649	2	21250223	A	G	0.437	cg07636176	2	21267175	0.32947	7.90985	0.04774	8.16e-15
Adolescence	rs453862	2	21450714	G	A	0.161	cg16306978	2	21266953	-0.46432	-7.89965	0.04171	8.8e-15
Adolescence	rs638988	2	21435271	G	C	0.159	cg16306978	2	21266953	-0.46963	-7.89744	0.04167	8.95e-15
Adolescence	rs139106085	2	21435700	A	C	0.159	cg16306978	2	21266953	-0.46963	-7.89744	0.04167	8.95e-15
Adolescence	rs441169	2	21437028	G	T	0.159	cg16306978	2	21266953	-0.46963	-7.89744	0.04167	8.95e-15
Adolescence	rs7605304	2	21445569	A	G	0.189	cg16306978	2	21266953	0.43058	7.89469	0.03848	9.14e-15
Adolescence	rs75429038	2	21445743	C	T	0.189	cg16306978	2	21266953	0.43058	7.89469	0.03848	9.14e-15
Adolescence	rs13412147	2	21448887	T	C	0.189	cg16306978	2	21266953	0.43058	7.89469	0.03848	9.14e-15
Adolescence	rs140053693	2	21449278	D	R	0.189	cg16306978	2	21266953	0.43058	7.89469	0.03848	9.14e-15
Adolescence	rs1079457	2	21449498	G	C	0.189	cg16306978	2	21266953	0.43058	7.89469	0.03848	9.14e-15
Adolescence	rs7567217	2	21303470	C	T	0.127	cg16723488	2	21266947	-0.49871	-7.8904	0.04049	9.43e-15
Adolescence	rs12720816	2	21239667	C	T	0.394	cg25123895	2	21267113	0.34447	7.8886	0.02372	9.56e-15
Adolescence	rs57289321	2	21428937	D	R	0.195	cg25071744	2	21266995	0.40751	7.88761	0.02294	9.63e-15
Adolescence	rs481069	2	21281856	G	A	0.126	cg16723488	2	21266947	-0.49977	-7.88675	0.04049	9.69e-15
Adolescence	rs661665	2	21265141	A	C	0.5	cg25123895	2	21267113	-0.33107	-7.88601	0.01766	9.75e-15
Adolescence	rs12714264	2	21265518	T	A	0.12	cg24309555	2	21266956	-0.50769	-7.88353	0.01139	9.93e-15
Adolescence	rs76520886	2	21427969	G	A	0.186	cg25071744	2	21266995	0.41633	7.88349	0.02297	9.93e-15
Adolescence	rs312026	2	21459587	C	G	0.312	cg00673290	2	21266727	0.36241	7.87808	0.03061	1.03e-14
Adolescence	rs56143640	2	21476301	G	A	0.312	cg00673290	2	21266727	0.36035	7.87631	0.03028	1.05e-14
Adolescence	rs312051	2	21429055	C	G	0.161	cg03350299	2	21266960	-0.45836	-7.87061	0.00797	1.09e-14
Adolescence	rs365946	2	21439329	T	G	0.16	cg03350299	2	21266960	-0.45836	-7.87061	0.00797	1.09e-14
Adolescence	rs428696	2	21448607	T	C	0.161	cg03350299	2	21266960	-0.4583	-7.86942	0.00789	1.1e-14
Adolescence	rs1820914	2	21402957	T	C	0.185	cg25071744	2	21266995	0.41747	7.86494	0.02416	1.14e-14
Adolescence	rs113156606	2	21414638	C	T	0.185	cg25071744	2	21266995	0.41747	7.86494	0.02416	1.14e-14
Adolescence	rs12468735	2	21275825	A	G	0.474	cg15246511	2	21267212	-0.32413	-7.86002	0.04229	1.18e-14
Adolescence	rs11892073	2	21276401	A	G	0.474	cg15246511	2	21267212	-0.32413	-7.86002	0.04229	1.18e-14
Adolescence	rs403880	2	21449408	T	C	0.161	cg03350299	2	21266960	-0.45564	-7.85865	0.00794	1.19e-14
Adolescence	rs432483	2	21450349	G	C	0.161	cg03350299	2	21266960	-0.45564	-7.85865	0.00794	1.19e-14
Adolescence	rs431493	2	21450824	G	C	0.161	cg03350299	2	21266960	-0.45564	-7.85865	0.00794	1.19e-14
Adolescence	rs367162	2	21444779	C	T	0.161	cg03350299	2	21266960	-0.45525	-7.85826	0.00796	1.2e-14
Adolescence	rs380240	2	21446653	T	C	0.161	cg03350299	2	21266960	-0.45525	-7.85826	0.00796	1.2e-14
Adolescence	rs312031	2	21471649	A	G	0.315	cg00673290	2	21266727	0.35898	7.85457	0.03024	1.23e-14
Adolescence	rs312026	2	21459587	C	G	0.312	cg16306978	2	21266953	0.36049	7.8459	0.03081	1.31e-14
Adolescence	rs10221768	2	21417431	A	C	0.127	cg16723488	2	21266947	-0.4935	-7.84564	0.03488	1.32e-14
Adolescence	rs312046	2	21474487	T	C	0.316	cg16306978	2	21266953	0.35847	7.8455	0.03182	1.32e-14
Adolescence	rs56232451	2	21424673	G	C	0.185	cg25071744	2	21266995	0.41476	7.84366	0.02297	1.34e-14
Adolescence	rs473448	2	21402456	T	G	0.228	cg16306978	2	21266953	-0.3943	-7.83819	0.02892	1.39e-14
Adolescence	rs476124	2	21402716	G	C	0.228	cg16306978	2	21266953	-0.3943	-7.83819	0.02892	1.39e-14
Adolescence	rs477964	2	21402916	A	G	0.228	cg16306978	2	21266953	-0.3943	-7.83819	0.02892	1.39e-14
Adolescence	rs478148	2	21402981	T	C	0.228	cg16306978	2	21266953	-0.3943	-7.83819	0.02892	1.39e-14
Adolescence	rs505813	2	21403639	T	C	0.228	cg16306978	2	21266953	-0.3943	-7.83819	0.02892	1.39e-14
Adolescence	rs507627	2	21403829	T	C	0.228	cg16306978	2	21266953	-0.3943	-7.83819	0.02892	1.39e-14
Adolescence	rs473770	2	21403965	G	A	0.228	cg16306978	2	21266953	-0.3943	-7.83819	0.02892	1.39e-14
Adolescence	rs499560	2	21404398	A	G	0.228	cg16306978	2	21266953	-0.3943	-7.83819	0.02892	1.39e-14
Adolescence	rs499757	2	21404468	T	A	0.228	cg16306978	2	21266953	-0.3943	-7.83819	0.02892	1.39e-14
Adolescence	rs537810	2	21404816	T	A	0.228	cg16306978	2	21266953	-0.3943	-7.83819	0.02892	1.39e-14
Adolescence	rs538862	2	21404980	A	G	0.228	cg16306978	2	21266953	-0.3943	-7.83819	0.02892	1.39e-14
Adolescence	rs567071	2	21405790	G	A	0.228	cg16306978	2	21266953	-0.3943	-7.83819	0.02892	1.39e-14
Adolescence	rs480484	2	21406048	T	C	0.228	cg16306978	2	21266953	-0.3943	-7.83819	0.02892	1.39e-14
Adolescence	rs484268	2	21406471	T	C	0.228	cg16306978	2	21266953	-0.3943	-7.83819	0.02892	1.39e-14
Adolescence	rs484399	2	21406568	C	A	0.228	cg16306978	2	21266953	-0.3943	-7.83819	0.02892	1.39e-14
Adolescence	rs488922	2	21406942	C	T	0.228	cg16306978	2	21266953	-0.3943	-7.83819	0.02892	1.39e-14
Adolescence	rs489022	2	21406981	T	C	0.228	cg16306978	2	21266953	-0.3943	-7.83819	0.02892	1.39e-14
Adolescence	rs312937	2	21408841	T	C	0.228	cg16306978	2	21266953	-0.3943	-7.83819	0.02892	1.39e-14
Adolescence	rs312938	2	21409165	A	G	0.228	cg16306978	2	21266953	-0.3943	-7.83819	0.02892	1.39e-14
Adolescence	rs312939	2	21409548	G	A	0.228	cg16306978	2	21266953	-0.3943	-7.83819	0.02892	1.39e-14
Adolescence	rs312940	2	21409717	A	G	0.228	cg16306978	2	21266953	-0.3943	-7.83819	0.02892	1.39e-14
Adolescence	rs167499	2	21410404	T	C	0.228	cg16306978	2	21266953	-0.3943	-7.83819	0.02892	1.39e-14
Adolescence	rs312031	2	21471649	A	G	0.315	cg16306978	2	21266953	0.35774	7.83804	0.03166	1.39e-14
Adolescence	rs453862	2	21450714	G	A	0.161	cg03350299	2	21266960	-0.45403	-7.83569	0.00796	1.42e-14
Adolescence	rs1712249	2	21385974	T	C	0.226	cg03350299	2	21266960	-0.38851	-7.83512	0.00789	1.42e-14
Adolescence	rs200038330	2	21289489	D	R	0.469	cg15246511	2	21267212	-0.32349	-7.83465	0.04163	1.43e-14
Adolescence	rs7566040	2	21454424	G	T	0.405	cg25071744	2	21266995	0.32648	7.83321	0.01982	1.44e-14
Adolescence	rs144545816	2	21413077	A	G	0.287	cg03350299	2	21266960	0.36403	7.83184	0.00598	1.46e-14
Adolescence	rs200657767	2	21414642	I	R	0.287	cg03350299	2	21266960	0.36403	7.83184	0.00598	1.46e-14
Adolescence	rs535713	2	21414072	G	C	0.228	cg16306978	2	21266953	-0.39265	-7.83085	0.02985	1.47e-14
Adolescence	rs312974	2	21374413	C	T	0.285	cg25071744	2	21266995	-0.35309	-7.82803	0.02101	1.5e-14
Adolescence	rs312976	2	21375346	G	A	0.285	cg25071744	2	21266995	-0.35309	-7.82803	0.02101	1.5e-14
Adolescence	rs503662	2	21414142	T	C	0.229	cg16306978	2	21266953	-0.39114	-7.82802	0.03077	1.5e-14
Adolescence	rs480732	2	21390149	A	T	0.183	cg00673290	2	21266727	-0.43654	-7.82707	0.04179	1.51e-14
Adolescence	rs480787	2	21390169	A	G	0.183	cg00673290	2	21266727	-0.43654	-7.82707	0.04179	1.51e-14
Adolescence	rs36058849	2	21390309	D	R	0.183	cg00673290	2	21266727	-0.43654	-7.82707	0.04179	1.51e-14
Adolescence	rs483436	2	21390407	G	A	0.183	cg00673290	2	21266727	-0.43654	-7.82707	0.04179	1.51e-14
Adolescence	rs486139	2	21390674	G	A	0.183	cg00673290	2	21266727	-0.43654	-7.82707	0.04179	1.51e-14
Adolescence	rs489010	2	21390992	G	A	0.183	cg00673290	2	21266727	-0.43654	-7.82707	0.04179	1.51e-14
Adolescence	rs514757	2	21391531	G	A	0.183	cg00673290	2	21266727	-0.43654	-7.82707	0.04179	1.51e-14
Adolescence	rs538528	2	21391740	T	C	0.183	cg00673290	2	21266727	-0.43654	-7.82707	0.04179	1.51e-14
Adolescence	rs518280	2	21391892	G	A	0.183	cg00673290	2	21266727	-0.43654	-7.82707	0.04179	1.51e-14
Adolescence	rs540439	2	21391978	C	T	0.183	cg00673290	2	21266727	-0.43654	-7.82707	0.04179	1.51e-14
Adolescence	rs563280	2	21392153	T	G	0.183	cg00673290	2	21266727	-0.43654	-7.82707	0.04179	1.51e-14
Adolescence	rs564073	2	21392213	A	T	0.183	cg00673290	2	21266727	-0.43654	-7.82707	0.04179	1.51e-14
Adolescence	rs542261	2	21392229	G	A	0.183	cg00673290	2	21266727	-0.43654	-7.82707	0.04179	1.51e-14
Adolescence	rs34878249	2	21392280	D	R	0.183	cg00673290	2	21266727	-0.43654	-7.82707	0.04179	1.51e-14
Adolescence	rs565894	2	21392426	T	C	0.183	cg00673290	2	21266727	-0.43654	-7.82707	0.04179	1.51e-14
Adolescence	rs566913	2	21392570	C	T	0.183	cg00673290	2	21266727	-0.43654	-7.82707	0.04179	1.51e-14
Adolescence	rs568740	2	21392744	C	T	0.183	cg00673290	2	21266727	-0.43654	-7.82707	0.04179	1.51e-14
Adolescence	rs548594	2	21392918	T	C	0.183	cg00673290	2	21266727	-0.43654	-7.82707	0.04179	1.51e-14
Adolescence	rs484802	2	21393321	C	T	0.183	cg00673290	2	21266727	-0.43654	-7.82707	0.04179	1.51e-14
Adolescence	rs484906	2	21393348	G	T	0.183	cg00673290	2	21266727	-0.43654	-7.82707	0.04179	1.51e-14
Adolescence	rs576203	2	21393623	A	G	0.183	cg00673290	2	21266727	-0.43654	-7.82707	0.04179	1.51e-14
Adolescence	rs488507	2	21393689	G	T	0.183	cg00673290	2	21266727	-0.43654	-7.82707	0.04179	1.51e-14
Adolescence	rs578095	2	21393866	A	G	0.183	cg00673290	2	21266727	-0.43654	-7.82707	0.04179	1.51e-14
Adolescence	rs578864	2	21393937	C	G	0.183	cg00673290	2	21266727	-0.43654	-7.82707	0.04179	1.51e-14
Adolescence	rs492364	2	21394199	C	T	0.183	cg00673290	2	21266727	-0.43654	-7.82707	0.04179	1.51e-14
Adolescence	rs492365	2	21394201	A	G	0.183	cg00673290	2	21266727	-0.43654	-7.82707	0.04179	1.51e-14
Adolescence	rs492494	2	21394248	C	T	0.183	cg00673290	2	21266727	-0.43654	-7.82707	0.04179	1.51e-14
Adolescence	rs493404	2	21394340	G	A	0.183	cg00673290	2	21266727	-0.43654	-7.82707	0.04179	1.51e-14
Adolescence	rs549959	2	21394458	T	C	0.183	cg00673290	2	21266727	-0.43654	-7.82707	0.04179	1.51e-14
Adolescence	rs496100	2	21394614	A	G	0.183	cg00673290	2	21266727	-0.43654	-7.82707	0.04179	1.51e-14
Adolescence	rs553523	2	21394798	T	G	0.183	cg00673290	2	21266727	-0.43654	-7.82707	0.04179	1.51e-14
Adolescence	rs554414	2	21394892	T	C	0.183	cg00673290	2	21266727	-0.43654	-7.82707	0.04179	1.51e-14
Adolescence	rs556504	2	21395261	C	G	0.183	cg00673290	2	21266727	-0.43654	-7.82707	0.04179	1.51e-14
Adolescence	rs557316	2	21395337	A	G	0.183	cg00673290	2	21266727	-0.43654	-7.82707	0.04179	1.51e-14
Adolescence	rs558342	2	21395469	G	A	0.183	cg00673290	2	21266727	-0.43654	-7.82707	0.04179	1.51e-14
Adolescence	rs559967	2	21395598	A	G	0.183	cg00673290	2	21266727	-0.43654	-7.82707	0.04179	1.51e-14
Adolescence	rs561850	2	21395805	A	G	0.183	cg00673290	2	21266727	-0.43654	-7.82707	0.04179	1.51e-14
Adolescence	rs473269	2	21395830	T	C	0.183	cg00673290	2	21266727	-0.43654	-7.82707	0.04179	1.51e-14
Adolescence	rs563719	2	21396001	C	A	0.183	cg00673290	2	21266727	-0.43654	-7.82707	0.04179	1.51e-14
Adolescence	rs563752	2	21396013	A	G	0.183	cg00673290	2	21266727	-0.43654	-7.82707	0.04179	1.51e-14
Adolescence	rs477146	2	21396334	A	G	0.183	cg00673290	2	21266727	-0.43654	-7.82707	0.04179	1.51e-14
Adolescence	rs13411597	2	21396488	G	A	0.183	cg00673290	2	21266727	-0.43654	-7.82707	0.04179	1.51e-14
Adolescence	rs1652417	2	21396517	T	C	0.183	cg00673290	2	21266727	-0.43654	-7.82707	0.04179	1.51e-14
Adolescence	rs1712251	2	21396551	G	A	0.183	cg00673290	2	21266727	-0.43654	-7.82707	0.04179	1.51e-14
Adolescence	rs1652416	2	21396609	A	G	0.183	cg00673290	2	21266727	-0.43654	-7.82707	0.04179	1.51e-14
Adolescence	rs483621	2	21397035	T	A	0.183	cg00673290	2	21266727	-0.43654	-7.82707	0.04179	1.51e-14
Adolescence	rs506585	2	21397182	G	A	0.183	cg00673290	2	21266727	-0.43654	-7.82707	0.04179	1.51e-14
Adolescence	rs507616	2	21397321	G	C	0.183	cg00673290	2	21266727	-0.43654	-7.82707	0.04179	1.51e-14
Adolescence	rs531380	2	21397561	C	G	0.183	cg00673290	2	21266727	-0.43654	-7.82707	0.04179	1.51e-14
Adolescence	rs532225	2	21397637	T	C	0.183	cg00673290	2	21266727	-0.43654	-7.82707	0.04179	1.51e-14
Adolescence	rs560408	2	21398379	T	C	0.183	cg00673290	2	21266727	-0.43654	-7.82707	0.04179	1.51e-14
Adolescence	rs541569	2	21398768	G	A	0.183	cg00673290	2	21266727	-0.43654	-7.82707	0.04179	1.51e-14
Adolescence	rs11321159	2	21398857	D	R	0.183	cg00673290	2	21266727	-0.43654	-7.82707	0.04179	1.51e-14
Adolescence	rs544039	2	21398985	C	A	0.183	cg00673290	2	21266727	-0.43654	-7.82707	0.04179	1.51e-14
Adolescence	rs478442	2	21399216	G	T	0.183	cg00673290	2	21266727	-0.43654	-7.82707	0.04179	1.51e-14
Adolescence	rs570033	2	21399567	C	G	0.183	cg00673290	2	21266727	-0.43654	-7.82707	0.04179	1.51e-14
Adolescence	rs574461	2	21400013	A	G	0.183	cg00673290	2	21266727	-0.43654	-7.82707	0.04179	1.51e-14
Adolescence	rs487858	2	21400305	G	A	0.183	cg00673290	2	21266727	-0.43654	-7.82707	0.04179	1.51e-14
Adolescence	rs494315	2	21400950	C	T	0.183	cg00673290	2	21266727	-0.43654	-7.82707	0.04179	1.51e-14
Adolescence	rs494465	2	21401010	C	T	0.183	cg00673290	2	21266727	-0.43654	-7.82707	0.04179	1.51e-14
Adolescence	rs522822	2	21401851	A	G	0.183	cg00673290	2	21266727	-0.43654	-7.82707	0.04179	1.51e-14
Adolescence	rs11901649	2	21250223	A	G	0.437	cg16723488	2	21266947	0.33946	7.82598	0.02788	1.52e-14
Adolescence	rs531819	2	21263639	T	G	0.139	cg16723488	2	21266947	-0.47837	-7.82529	0.04183	1.53e-14
Adolescence	rs1800481	2	21267210	A	G	0.139	cg16723488	2	21266947	-0.47837	-7.82529	0.04183	1.53e-14
Adolescence	rs585967	2	21270554	A	C	0.139	cg16723488	2	21266947	-0.47837	-7.82529	0.04183	1.53e-14
Adolescence	rs1713222	2	21271323	A	G	0.139	cg16723488	2	21266947	-0.47837	-7.82529	0.04183	1.53e-14
Adolescence	rs66774912	2	21423532	A	G	0.125	cg16723488	2	21266947	-0.49717	-7.82101	0.02698	1.58e-14
Adolescence	rs10181679	2	21463518	A	C	0.311	cg00673290	2	21266727	0.35946	7.81846	0.03051	1.61e-14
Adolescence	rs312043	2	21464421	A	G	0.311	cg00673290	2	21266727	0.35946	7.81846	0.03051	1.61e-14
Adolescence	rs312042	2	21464498	G	A	0.311	cg00673290	2	21266727	0.35946	7.81846	0.03051	1.61e-14
Adolescence	rs4635554	2	21389659	G	T	0.332	cg00673290	2	21266727	0.3552	7.81676	0.02598	1.63e-14
Adolescence	rs7605304	2	21445569	A	G	0.189	cg16723488	2	21266947	0.42622	7.81601	0.0365	1.64e-14
Adolescence	rs75429038	2	21445743	C	T	0.189	cg16723488	2	21266947	0.42622	7.81601	0.0365	1.64e-14
Adolescence	rs13412147	2	21448887	T	C	0.189	cg16723488	2	21266947	0.42622	7.81601	0.0365	1.64e-14
Adolescence	rs140053693	2	21449278	D	R	0.189	cg16723488	2	21266947	0.42622	7.81601	0.0365	1.64e-14
Adolescence	rs1079457	2	21449498	G	C	0.189	cg16723488	2	21266947	0.42622	7.81601	0.0365	1.64e-14
Adolescence	rs12720816	2	21239667	C	T	0.394	cg07636176	2	21267175	0.33051	7.81227	0.05151	1.69e-14
Adolescence	rs71435601	2	21428289	G	A	0.127	cg25071744	2	21266995	-0.47463	-7.8094	0.02392	1.72e-14
Adolescence	rs12714264	2	21265518	T	A	0.12	cg25071744	2	21266995	-0.48824	-7.80863	0.02833	1.73e-14
Adolescence	rs6756284	2	21309856	A	G	0.126	cg16723488	2	21266947	-0.49575	-7.80787	0.04047	1.74e-14
Adolescence	rs568938	2	21303616	C	T	0.184	cg00673290	2	21266727	-0.42987	-7.80321	0.04132	1.8e-14
Adolescence	rs201371756	2	21284889	D	R	0.4	cg00673290	2	21266727	0.33856	7.79777	0.02948	1.88e-14
Adolescence	rs13393101	2	21430401	C	T	0.189	cg16306978	2	21266953	0.42553	7.7954	0.03821	1.91e-14
Adolescence	rs201371756	2	21284889	D	R	0.4	cg03350299	2	21266960	0.33286	7.79246	0.00707	1.95e-14
Adolescence	rs312974	2	21374413	C	T	0.285	cg03350299	2	21266960	-0.36127	-7.79221	0.00912	1.95e-14
Adolescence	rs312976	2	21375346	G	A	0.285	cg03350299	2	21266960	-0.36127	-7.79221	0.00912	1.95e-14
Adolescence	rs520861	2	21387239	A	G	0.228	cg03350299	2	21266960	-0.38493	-7.78988	0.00773	1.99e-14
Adolescence	rs1652423	2	21383524	G	A	0.184	cg00673290	2	21266727	-0.43421	-7.78678	0.04179	2.03e-14
Adolescence	rs28562532	2	21309122	T	C	0.126	cg16723488	2	21266947	-0.49385	-7.78656	0.04049	2.04e-14
Adolescence	rs76935526	2	21386353	T	C	0.184	cg00673290	2	21266727	0.4325	7.78397	0.03187	2.08e-14
Adolescence	rs79524936	2	21389323	C	T	0.184	cg00673290	2	21266727	0.4325	7.78397	0.03187	2.08e-14
Adolescence	rs144286714	2	21412151	T	G	0.174	cg24309555	2	21266956	0.43549	7.78167	0.00781	2.11e-14
Adolescence	rs148134238	2	21438682	D	R	0.185	cg25071744	2	21266995	0.41166	7.78065	0.02529	2.13e-14
Adolescence	rs60403635	2	21272778	C	T	0.038	cg25071744	2	21266995	-0.82673	-7.77931	0.05153	2.15e-14
Adolescence	rs312970	2	21369815	A	T	0.182	cg00673290	2	21266727	-0.43398	-7.77332	0.04179	2.25e-14
Adolescence	rs312979	2	21377705	A	T	0.182	cg00673290	2	21266727	-0.43398	-7.77332	0.04179	2.25e-14
Adolescence	rs72336878	2	21377928	D	R	0.182	cg00673290	2	21266727	-0.43398	-7.77332	0.04179	2.25e-14
Adolescence	rs312981	2	21378151	G	A	0.182	cg00673290	2	21266727	-0.43398	-7.77332	0.04179	2.25e-14
Adolescence	rs312982	2	21378226	G	C	0.182	cg00673290	2	21266727	-0.43398	-7.77332	0.04179	2.25e-14
Adolescence	rs34908258	2	21378431	D	R	0.182	cg00673290	2	21266727	-0.43398	-7.77332	0.04179	2.25e-14
Adolescence	rs200200214	2	21378433	D	R	0.182	cg00673290	2	21266727	-0.43398	-7.77332	0.04179	2.25e-14
Adolescence	rs312983	2	21378580	A	C	0.182	cg00673290	2	21266727	-0.43398	-7.77332	0.04179	2.25e-14
Adolescence	rs312984	2	21378778	C	T	0.182	cg00673290	2	21266727	-0.43398	-7.77332	0.04179	2.25e-14
Adolescence	rs151224593	2	21379144	D	R	0.182	cg00673290	2	21266727	-0.43398	-7.77332	0.04179	2.25e-14
Adolescence	rs529396	2	21381268	G	C	0.182	cg00673290	2	21266727	-0.43398	-7.77332	0.04179	2.25e-14
Adolescence	rs530474	2	21381435	G	A	0.182	cg00673290	2	21266727	-0.43398	-7.77332	0.04179	2.25e-14
Adolescence	rs559318	2	21381490	C	T	0.182	cg00673290	2	21266727	-0.43398	-7.77332	0.04179	2.25e-14
Adolescence	rs532300	2	21381608	C	A	0.182	cg00673290	2	21266727	-0.43398	-7.77332	0.04179	2.25e-14
Adolescence	rs533211	2	21381702	G	A	0.182	cg00673290	2	21266727	-0.43398	-7.77332	0.04179	2.25e-14
Adolescence	rs557197	2	21381781	T	G	0.182	cg00673290	2	21266727	-0.43398	-7.77332	0.04179	2.25e-14
Adolescence	rs34416543	2	21382105	I	R	0.182	cg00673290	2	21266727	-0.43398	-7.77332	0.04179	2.25e-14
Adolescence	rs11388395	2	21382319	I	R	0.182	cg00673290	2	21266727	-0.43398	-7.77332	0.04179	2.25e-14
Adolescence	rs560522	2	21382363	A	C	0.182	cg00673290	2	21266727	-0.43398	-7.77332	0.04179	2.25e-14
Adolescence	rs527034	2	21382786	C	A	0.182	cg00673290	2	21266727	-0.43398	-7.77332	0.04179	2.25e-14
Adolescence	rs525172	2	21382976	T	G	0.182	cg00673290	2	21266727	-0.43398	-7.77332	0.04179	2.25e-14
Adolescence	rs479413	2	21383279	T	G	0.182	cg00673290	2	21266727	-0.43398	-7.77332	0.04179	2.25e-14
Adolescence	rs480488	2	21383434	A	G	0.182	cg00673290	2	21266727	-0.43398	-7.77332	0.04179	2.25e-14
Adolescence	rs4560142	2	21383717	C	T	0.182	cg00673290	2	21266727	-0.43398	-7.77332	0.04179	2.25e-14
Adolescence	rs4591370	2	21383742	A	G	0.182	cg00673290	2	21266727	-0.43398	-7.77332	0.04179	2.25e-14
Adolescence	rs1652422	2	21383841	A	G	0.182	cg00673290	2	21266727	-0.43398	-7.77332	0.04179	2.25e-14
Adolescence	rs1652421	2	21383848	A	G	0.182	cg00673290	2	21266727	-0.43398	-7.77332	0.04179	2.25e-14
Adolescence	rs1652420	2	21383881	A	T	0.182	cg00673290	2	21266727	-0.43398	-7.77332	0.04179	2.25e-14
Adolescence	rs1712247	2	21383951	C	T	0.182	cg00673290	2	21266727	-0.43398	-7.77332	0.04179	2.25e-14
Adolescence	rs492255	2	21384272	C	T	0.182	cg00673290	2	21266727	-0.43398	-7.77332	0.04179	2.25e-14
Adolescence	rs544450	2	21384358	T	C	0.182	cg00673290	2	21266727	-0.43398	-7.77332	0.04179	2.25e-14
Adolescence	rs544655	2	21384441	G	T	0.182	cg00673290	2	21266727	-0.43398	-7.77332	0.04179	2.25e-14
Adolescence	rs547179	2	21384662	A	G	0.182	cg00673290	2	21266727	-0.43398	-7.77332	0.04179	2.25e-14
Adolescence	rs547235	2	21384682	A	G	0.182	cg00673290	2	21266727	-0.43398	-7.77332	0.04179	2.25e-14
Adolescence	rs547239	2	21384686	T	A	0.182	cg00673290	2	21266727	-0.43398	-7.77332	0.04179	2.25e-14
Adolescence	rs572246	2	21385149	T	C	0.182	cg00673290	2	21266727	-0.43398	-7.77332	0.04179	2.25e-14
Adolescence	rs573314	2	21385161	C	G	0.182	cg00673290	2	21266727	-0.43398	-7.77332	0.04179	2.25e-14
Adolescence	rs548506	2	21385541	A	G	0.182	cg00673290	2	21266727	-0.43398	-7.77332	0.04179	2.25e-14
Adolescence	rs1652419	2	21385649	C	T	0.182	cg00673290	2	21266727	-0.43398	-7.77332	0.04179	2.25e-14
Adolescence	rs1712250	2	21386058	C	T	0.182	cg00673290	2	21266727	-0.43398	-7.77332	0.04179	2.25e-14
Adolescence	rs1367120	2	21386304	T	C	0.182	cg00673290	2	21266727	-0.43398	-7.77332	0.04179	2.25e-14
Adolescence	rs1367119	2	21386375	A	G	0.182	cg00673290	2	21266727	-0.43398	-7.77332	0.04179	2.25e-14
Adolescence	rs522963	2	21386957	T	C	0.182	cg00673290	2	21266727	-0.43398	-7.77332	0.04179	2.25e-14
Adolescence	rs522250	2	21387113	T	C	0.182	cg00673290	2	21266727	-0.43398	-7.77332	0.04179	2.25e-14
Adolescence	rs529697	2	21387948	G	T	0.182	cg00673290	2	21266727	-0.43398	-7.77332	0.04179	2.25e-14
Adolescence	rs490757	2	21388224	C	T	0.182	cg00673290	2	21266727	-0.43398	-7.77332	0.04179	2.25e-14
Adolescence	rs11383998	2	21388401	I	R	0.182	cg00673290	2	21266727	-0.43398	-7.77332	0.04179	2.25e-14
Adolescence	rs1652418	2	21388456	T	C	0.182	cg00673290	2	21266727	-0.43398	-7.77332	0.04179	2.25e-14
Adolescence	rs538928	2	21389019	A	G	0.182	cg00673290	2	21266727	-0.43398	-7.77332	0.04179	2.25e-14
Adolescence	rs560844	2	21389108	A	G	0.182	cg00673290	2	21266727	-0.43398	-7.77332	0.04179	2.25e-14
Adolescence	rs563696	2	21389430	T	A	0.182	cg00673290	2	21266727	-0.43398	-7.77332	0.04179	2.25e-14
Adolescence	rs475887	2	21389485	T	G	0.182	cg00673290	2	21266727	-0.43398	-7.77332	0.04179	2.25e-14
Adolescence	rs479545	2	21389897	T	C	0.182	cg00673290	2	21266727	-0.43398	-7.77332	0.04179	2.25e-14
Adolescence	rs501863	2	21390000	G	A	0.182	cg00673290	2	21266727	-0.43398	-7.77332	0.04179	2.25e-14
Adolescence	rs672889	2	21319016	T	G	0.129	cg16723488	2	21266947	-0.49058	-7.77322	0.04057	2.25e-14
Adolescence	rs614303	2	21313577	G	A	0.182	cg00673290	2	21266727	-0.43211	-7.77101	0.04324	2.28e-14
Adolescence	rs10199768	2	21244000	T	G	0.442	cg16723488	2	21266947	0.33648	7.76976	0.02736	2.31e-14
Adolescence	rs13393101	2	21430401	C	T	0.189	cg16723488	2	21266947	0.42375	7.76758	0.03647	2.34e-14
Adolescence	rs72405792	2	21367696	D	R	0.126	cg16723488	2	21266947	-0.49643	-7.76398	0.04241	2.41e-14
Adolescence	rs34882389	2	21381214	C	A	0.126	cg16723488	2	21266947	-0.49643	-7.76398	0.04241	2.41e-14
Adolescence	rs36018965	2	21383536	A	G	0.126	cg16723488	2	21266947	-0.49643	-7.76398	0.04241	2.41e-14
Adolescence	rs97458	2	21327635	G	A	0.287	cg25071744	2	21266995	-0.34934	-7.75601	0.02012	2.55e-14
Adolescence	rs35913552	2	21272896	A	G	0.128	cg16723488	2	21266947	-0.4887	-7.75345	0.04168	2.6e-14
Adolescence	rs312944	2	21325188	A	T	0.182	cg00673290	2	21266727	-0.43281	-7.75076	0.04179	2.65e-14
Adolescence	rs200202030	2	21339931	D	R	0.182	cg00673290	2	21266727	-0.43281	-7.75076	0.04179	2.65e-14
Adolescence	rs312953	2	21339932	G	A	0.182	cg00673290	2	21266727	-0.43281	-7.75076	0.04179	2.65e-14
Adolescence	rs10205292	2	21426171	T	A	0.227	cg16306978	2	21266953	-0.38761	-7.75021	0.02985	2.66e-14
Adolescence	rs312945	2	21328825	A	G	0.286	cg25071744	2	21266995	-0.34887	-7.74833	0.02012	2.7e-14
Adolescence	rs312026	2	21459587	C	G	0.312	cg24309555	2	21266956	0.3521	7.74788	0.00607	2.71e-14
Adolescence	rs6146672	2	21442944	D	R	0.188	cg24309555	2	21266956	0.41988	7.74614	0.00824	2.74e-14
Adolescence	rs312985	2	21378805	A	G	0.183	cg00673290	2	21266727	-0.43211	-7.74198	0.04178	2.83e-14
Adolescence	rs7605304	2	21445569	A	G	0.189	cg25123895	2	21267113	0.41921	7.74045	0.02643	2.86e-14
Adolescence	rs75429038	2	21445743	C	T	0.189	cg25123895	2	21267113	0.41921	7.74045	0.02643	2.86e-14
Adolescence	rs13412147	2	21448887	T	C	0.189	cg25123895	2	21267113	0.41921	7.74045	0.02643	2.86e-14
Adolescence	rs140053693	2	21449278	D	R	0.189	cg25123895	2	21267113	0.41921	7.74045	0.02643	2.86e-14
Adolescence	rs1079457	2	21449498	G	C	0.189	cg25123895	2	21267113	0.41921	7.74045	0.02643	2.86e-14
Adolescence	rs12618122	2	21417978	G	C	0.282	cg16306978	2	21266953	-0.36405	-7.73885	0.03866	2.89e-14
Adolescence	rs57289321	2	21428937	D	R	0.195	cg03350299	2	21266960	0.41134	7.73824	0.008	2.91e-14
Adolescence	rs149412333	2	21404245	D	R	0.228	cg16306978	2	21266953	-0.38942	-7.73543	0.02892	2.97e-14
Adolescence	rs56143640	2	21476301	G	A	0.312	cg25071744	2	21266995	0.33908	7.7315	0.01846	3.05e-14
Adolescence	rs312046	2	21474487	T	C	0.316	cg24309555	2	21266956	0.34931	7.72815	0.00611	3.13e-14
Adolescence	rs13420469	2	21449034	C	T	0.237	cg15246511	2	21267212	0.37111	7.7266	0.0421	3.17e-14
Adolescence	rs949790	2	21449987	A	G	0.237	cg15246511	2	21267212	0.37111	7.7266	0.0421	3.17e-14
Adolescence	rs11900894	2	21450264	C	A	0.237	cg15246511	2	21267212	0.37111	7.7266	0.0421	3.17e-14
Adolescence	rs181436666	2	21317969	T	C	0.265	cg16723488	2	21266947	0.37406	7.72594	0.03372	3.18e-14
Adolescence	rs478588	2	21297149	A	G	0.184	cg00673290	2	21266727	-0.42583	-7.72451	0.04132	3.22e-14
Adolescence	rs201371756	2	21284889	D	R	0.4	cg16306978	2	21266953	0.3349	7.7199	0.02854	3.33e-14
Adolescence	rs504616	2	21414020	C	G	0.183	cg00673290	2	21266727	-0.42909	-7.71726	0.04083	3.39e-14
Adolescence	rs521685	2	21401631	C	T	0.229	cg03350299	2	21266960	-0.38137	-7.71378	0.00769	3.48e-14
Adolescence	rs521755	2	21401700	G	A	0.229	cg03350299	2	21266960	-0.38137	-7.71378	0.00769	3.48e-14
Adolescence	rs522761	2	21401789	T	C	0.229	cg03350299	2	21266960	-0.38137	-7.71378	0.00769	3.48e-14
Adolescence	rs522661	2	21401801	G	A	0.229	cg03350299	2	21266960	-0.38137	-7.71378	0.00769	3.48e-14
Adolescence	rs200796611	2	21401902	I	R	0.229	cg03350299	2	21266960	-0.38137	-7.71378	0.00769	3.48e-14
Adolescence	rs312945	2	21328825	A	G	0.286	cg03350299	2	21266960	-0.35687	-7.71096	0.00892	3.55e-14
Adolescence	rs72902576	2	21275480	G	T	0.039	cg25071744	2	21266995	-0.81421	-7.70889	0.0515	3.6e-14
Adolescence	rs72902579	2	21276008	C	T	0.039	cg25071744	2	21266995	-0.81421	-7.70889	0.0515	3.6e-14
Adolescence	rs558130	2	21381689	T	G	0.183	cg00673290	2	21266727	-0.43036	-7.7082	0.04178	3.62e-14
Adolescence	rs13011615	2	21274167	T	A	0.126	cg16723488	2	21266947	-0.48965	-7.70502	0.04047	3.71e-14
Adolescence	rs312031	2	21471649	A	G	0.315	cg24309555	2	21266956	0.3479	7.70425	0.00611	3.73e-14
Adolescence	rs62122481	2	21216815	A	C	0.391	cg24309555	2	21266956	0.33743	7.70379	0.00675	3.74e-14
Adolescence	rs577584	2	21299867	T	A	0.184	cg00673290	2	21266727	-0.42445	-7.70205	0.04126	3.79e-14
Adolescence	rs201371756	2	21284889	D	R	0.4	cg16723488	2	21266947	0.33387	7.70158	0.03034	3.8e-14
Adolescence	rs79192207	2	21417897	C	G	0.18	cg15246511	2	21267212	0.41498	7.70104	0.05247	3.82e-14
Adolescence	rs312053	2	21428049	C	A	0.229	cg16306978	2	21266953	-0.385	-7.69749	0.03139	3.92e-14
Adolescence	rs312052	2	21428185	G	A	0.229	cg16306978	2	21266953	-0.385	-7.69749	0.03139	3.92e-14
Adolescence	rs12477249	2	21400661	A	G	0.334	cg00673290	2	21266727	0.34877	7.69349	0.02297	4.03e-14
Adolescence	rs57289321	2	21428937	D	R	0.195	cg16723488	2	21266947	0.41476	7.69092	0.03221	4.11e-14
Adolescence	rs97458	2	21327635	G	A	0.287	cg03350299	2	21266960	-0.35598	-7.68696	0.00889	4.23e-14
Adolescence	rs36040007	2	21464447	D	R	0.21	cg16306978	2	21266953	-0.39888	-7.67476	0.03676	4.62e-14
Adolescence	rs71435601	2	21428289	G	A	0.127	cg16723488	2	21266947	-0.48658	-7.67429	0.02705	4.64e-14
Adolescence	rs17399838	2	21368217	G	A	0.126	cg16723488	2	21266947	-0.49015	-7.66968	0.04236	4.8e-14
Adolescence	rs386397	2	21451827	A	G	0.306	cg03350299	2	21266960	0.35209	7.66682	0.00612	4.9e-14
Adolescence	rs181436666	2	21317969	T	C	0.265	cg16306978	2	21266953	0.37151	7.66239	0.03135	5.06e-14
Adolescence	rs36040007	2	21464447	D	R	0.21	cg25071744	2	21266995	-0.38185	-7.66168	0.02571	5.09e-14
Adolescence	rs142614082	2	21436451	A	G	0.186	cg25071744	2	21266995	0.40553	7.66056	0.02526	5.13e-14
Adolescence	rs502323	2	21403297	A	C	0.182	cg00673290	2	21266727	-0.42998	-7.65842	0.04083	5.21e-14
Adolescence	rs504091	2	21403481	T	G	0.182	cg00673290	2	21266727	-0.42998	-7.65842	0.04083	5.21e-14
Adolescence	rs486246	2	21406751	G	A	0.182	cg00673290	2	21266727	-0.42998	-7.65842	0.04083	5.21e-14
Adolescence	rs312936	2	21408647	T	A	0.182	cg00673290	2	21266727	-0.42998	-7.65842	0.04083	5.21e-14
Adolescence	rs142786027	2	21413178	G	C	0.182	cg00673290	2	21266727	-0.42998	-7.65842	0.04083	5.21e-14
Adolescence	rs141479646	2	21413218	A	G	0.182	cg00673290	2	21266727	-0.42998	-7.65842	0.04083	5.21e-14
Adolescence	rs181403065	2	21435831	T	A	0.152	cg16306978	2	21266953	-0.46518	-7.65038	0.04163	5.52e-14
Adolescence	rs10181679	2	21463518	A	C	0.311	cg16306978	2	21266953	0.35163	7.64866	0.03057	5.59e-14
Adolescence	rs312043	2	21464421	A	G	0.311	cg16306978	2	21266953	0.35163	7.64866	0.03057	5.59e-14
Adolescence	rs312042	2	21464498	G	A	0.311	cg16306978	2	21266953	0.35163	7.64866	0.03057	5.59e-14
Adolescence	rs7605304	2	21445569	A	G	0.189	cg03350299	2	21266960	0.41145	7.63978	0.00617	5.96e-14
Adolescence	rs75429038	2	21445743	C	T	0.189	cg03350299	2	21266960	0.41145	7.63978	0.00617	5.96e-14
Adolescence	rs13412147	2	21448887	T	C	0.189	cg03350299	2	21266960	0.41145	7.63978	0.00617	5.96e-14
Adolescence	rs140053693	2	21449278	D	R	0.189	cg03350299	2	21266960	0.41145	7.63978	0.00617	5.96e-14
Adolescence	rs1079457	2	21449498	G	C	0.189	cg03350299	2	21266960	0.41145	7.63978	0.00617	5.96e-14
Adolescence	rs7567653	2	21276962	A	G	0.04	cg25071744	2	21266995	-0.80187	-7.63806	0.05153	6.04e-14
Adolescence	rs72902584	2	21278070	C	T	0.04	cg25071744	2	21266995	-0.80187	-7.63806	0.05153	6.04e-14
Adolescence	rs72902590	2	21289068	A	G	0.04	cg25071744	2	21266995	-0.80187	-7.63806	0.05153	6.04e-14
Adolescence	rs57667647	2	21292394	A	G	0.04	cg25071744	2	21266995	-0.80187	-7.63806	0.05153	6.04e-14
Adolescence	rs79428416	2	21293135	T	C	0.04	cg25071744	2	21266995	-0.80187	-7.63806	0.05153	6.04e-14
Adolescence	rs144545816	2	21413077	A	G	0.287	cg25071744	2	21266995	0.34598	7.63552	0.01888	6.15e-14
Adolescence	rs200657767	2	21414642	I	R	0.287	cg25071744	2	21266995	0.34598	7.63552	0.01888	6.15e-14
Adolescence	rs75404393	2	21382623	T	G	0.19	cg00673290	2	21266727	-0.42031	-7.62975	0.03919	6.41e-14
Adolescence	rs528113	2	21382624	G	T	0.19	cg00673290	2	21266727	-0.42031	-7.62975	0.03919	6.41e-14
Adolescence	rs5829773	2	21381292	I	R	0.188	cg00673290	2	21266727	-0.4227	-7.61965	0.04071	6.9e-14
Adolescence	rs17042000	2	21422928	T	C	0.18	cg00673290	2	21266727	-0.42347	-7.6195	0.037	6.91e-14
Adolescence	rs10166647	2	21460176	C	T	0.408	cg16306978	2	21266953	0.33063	7.61846	0.02739	6.96e-14
Adolescence	rs13393101	2	21430401	C	T	0.189	cg25123895	2	21267113	0.41293	7.61633	0.02643	7.07e-14
Adolescence	rs200275964	2	21268818	D	R	0.122	cg03350299	2	21266960	-0.48916	-7.61168	0.01027	7.31e-14
Adolescence	rs11903224	2	21431361	C	G	0.237	cg15246511	2	21267212	0.36589	7.61059	0.04185	7.37e-14
Adolescence	rs146928072	2	21436164	C	T	0.238	cg15246511	2	21267212	0.36589	7.61059	0.04185	7.37e-14
Adolescence	rs10199768	2	21244000	T	G	0.442	cg07636176	2	21267175	0.31711	7.60942	0.04517	7.43e-14
Adolescence	rs10181679	2	21463518	A	C	0.311	cg24309555	2	21266956	0.34582	7.60908	0.00605	7.45e-14
Adolescence	rs312043	2	21464421	A	G	0.311	cg24309555	2	21266956	0.34582	7.60908	0.00605	7.45e-14
Adolescence	rs312042	2	21464498	G	A	0.311	cg24309555	2	21266956	0.34582	7.60908	0.00605	7.45e-14
Adolescence	rs535713	2	21414072	G	C	0.228	cg03350299	2	21266960	-0.37655	-7.60739	0.00789	7.54e-14
Adolescence	rs10205292	2	21426171	T	A	0.227	cg03350299	2	21266960	-0.37527	-7.60634	0.00731	7.6e-14
Adolescence	rs7605304	2	21445569	A	G	0.189	cg25071744	2	21266995	0.39869	7.60458	0.02297	7.7e-14
Adolescence	rs75429038	2	21445743	C	T	0.189	cg25071744	2	21266995	0.39869	7.60458	0.02297	7.7e-14
Adolescence	rs13412147	2	21448887	T	C	0.189	cg25071744	2	21266995	0.39869	7.60458	0.02297	7.7e-14
Adolescence	rs140053693	2	21449278	D	R	0.189	cg25071744	2	21266995	0.39869	7.60458	0.02297	7.7e-14
Adolescence	rs1079457	2	21449498	G	C	0.189	cg25071744	2	21266995	0.39869	7.60458	0.02297	7.7e-14
Adolescence	rs403880	2	21449408	T	C	0.161	cg25071744	2	21266995	-0.42938	-7.59239	0.0235	8.41e-14
Adolescence	rs432483	2	21450349	G	C	0.161	cg25071744	2	21266995	-0.42938	-7.59239	0.0235	8.41e-14
Adolescence	rs431493	2	21450824	G	C	0.161	cg25071744	2	21266995	-0.42938	-7.59239	0.0235	8.41e-14
Adolescence	rs71435593	2	21302020	C	T	0.123	cg16723488	2	21266947	-0.48875	-7.592	0.04231	8.43e-14
Adolescence	rs367162	2	21444779	C	T	0.161	cg25071744	2	21266995	-0.42896	-7.59104	0.02343	8.49e-14
Adolescence	rs380240	2	21446653	T	C	0.161	cg25071744	2	21266995	-0.42896	-7.59104	0.02343	8.49e-14
Adolescence	rs473448	2	21402456	T	G	0.228	cg03350299	2	21266960	-0.37698	-7.58983	0.00749	8.56e-14
Adolescence	rs476124	2	21402716	G	C	0.228	cg03350299	2	21266960	-0.37698	-7.58983	0.00749	8.56e-14
Adolescence	rs477964	2	21402916	A	G	0.228	cg03350299	2	21266960	-0.37698	-7.58983	0.00749	8.56e-14
Adolescence	rs478148	2	21402981	T	C	0.228	cg03350299	2	21266960	-0.37698	-7.58983	0.00749	8.56e-14
Adolescence	rs505813	2	21403639	T	C	0.228	cg03350299	2	21266960	-0.37698	-7.58983	0.00749	8.56e-14
Adolescence	rs507627	2	21403829	T	C	0.228	cg03350299	2	21266960	-0.37698	-7.58983	0.00749	8.56e-14
Adolescence	rs473770	2	21403965	G	A	0.228	cg03350299	2	21266960	-0.37698	-7.58983	0.00749	8.56e-14
Adolescence	rs499560	2	21404398	A	G	0.228	cg03350299	2	21266960	-0.37698	-7.58983	0.00749	8.56e-14
Adolescence	rs499757	2	21404468	T	A	0.228	cg03350299	2	21266960	-0.37698	-7.58983	0.00749	8.56e-14
Adolescence	rs537810	2	21404816	T	A	0.228	cg03350299	2	21266960	-0.37698	-7.58983	0.00749	8.56e-14
Adolescence	rs538862	2	21404980	A	G	0.228	cg03350299	2	21266960	-0.37698	-7.58983	0.00749	8.56e-14
Adolescence	rs567071	2	21405790	G	A	0.228	cg03350299	2	21266960	-0.37698	-7.58983	0.00749	8.56e-14
Adolescence	rs480484	2	21406048	T	C	0.228	cg03350299	2	21266960	-0.37698	-7.58983	0.00749	8.56e-14
Adolescence	rs484268	2	21406471	T	C	0.228	cg03350299	2	21266960	-0.37698	-7.58983	0.00749	8.56e-14
Adolescence	rs484399	2	21406568	C	A	0.228	cg03350299	2	21266960	-0.37698	-7.58983	0.00749	8.56e-14
Adolescence	rs488922	2	21406942	C	T	0.228	cg03350299	2	21266960	-0.37698	-7.58983	0.00749	8.56e-14
Adolescence	rs489022	2	21406981	T	C	0.228	cg03350299	2	21266960	-0.37698	-7.58983	0.00749	8.56e-14
Adolescence	rs312937	2	21408841	T	C	0.228	cg03350299	2	21266960	-0.37698	-7.58983	0.00749	8.56e-14
Adolescence	rs312938	2	21409165	A	G	0.228	cg03350299	2	21266960	-0.37698	-7.58983	0.00749	8.56e-14
Adolescence	rs312939	2	21409548	G	A	0.228	cg03350299	2	21266960	-0.37698	-7.58983	0.00749	8.56e-14
Adolescence	rs312940	2	21409717	A	G	0.228	cg03350299	2	21266960	-0.37698	-7.58983	0.00749	8.56e-14
Adolescence	rs167499	2	21410404	T	C	0.228	cg03350299	2	21266960	-0.37698	-7.58983	0.00749	8.56e-14
Adolescence	rs67545613	2	21371195	D	R	0.184	cg00673290	2	21266727	-0.42192	-7.58361	0.04082	8.96e-14
Adolescence	rs62122481	2	21216815	A	C	0.391	cg16306978	2	21266953	0.33639	7.58186	0.02934	9.07e-14
Adolescence	rs6146672	2	21442944	D	R	0.188	cg16723488	2	21266947	0.41584	7.57692	0.0343	9.4e-14
Adolescence	rs181403065	2	21435831	T	A	0.152	cg03350299	2	21266960	-0.4542	-7.57681	0.00772	9.4e-14
Adolescence	rs7566040	2	21454424	G	T	0.405	cg16306978	2	21266953	0.32995	7.57394	0.02733	9.6e-14
Adolescence	rs1712246	2	21383514	G	A	0.186	cg00673290	2	21266727	-0.42198	-7.57321	0.04139	9.65e-14
Adolescence	rs34872576	2	21326183	G	A	0.126	cg16723488	2	21266947	-0.48499	-7.57273	0.04231	9.69e-14
Adolescence	rs34916112	2	21339285	A	C	0.126	cg16723488	2	21266947	-0.48499	-7.57273	0.04231	9.69e-14
Adolescence	rs312974	2	21374413	C	T	0.285	cg24309555	2	21266956	-0.35282	-7.57266	0.00801	9.69e-14
Adolescence	rs312976	2	21375346	G	A	0.285	cg24309555	2	21266956	-0.35282	-7.57266	0.00801	9.69e-14
Adolescence	rs661665	2	21265141	A	C	0.5	cg07636176	2	21267175	-0.3086	-7.57141	0.03881	9.78e-14
Adolescence	rs1712248	2	21385778	C	G	0.186	cg00673290	2	21266727	-0.42214	-7.56807	0.04155	1e-13
Adolescence	rs76935526	2	21386353	T	C	0.184	cg15246511	2	21267212	0.40184	7.56391	0.04663	1.03e-13
Adolescence	rs79524936	2	21389323	C	T	0.184	cg15246511	2	21267212	0.40184	7.56391	0.04663	1.03e-13
Adolescence	rs428696	2	21448607	T	C	0.161	cg25071744	2	21266995	-0.4297	-7.56142	0.02142	1.05e-13
Adolescence	rs13393101	2	21430401	C	T	0.189	cg03350299	2	21266960	0.40741	7.55963	0.00616	1.06e-13
Adolescence	rs503662	2	21414142	T	C	0.229	cg03350299	2	21266960	-0.37253	-7.5491	0.00796	1.15e-13
Adolescence	rs144286714	2	21412151	T	G	0.174	cg25071744	2	21266995	0.41045	7.54377	0.02184	1.19e-13
Adolescence	rs12714264	2	21265518	T	A	0.12	cg16723488	2	21266947	-0.49259	-7.54328	0.04024	1.2e-13
Adolescence	rs36040007	2	21464447	D	R	0.21	cg03350299	2	21266960	-0.3865	-7.53918	0.00796	1.23e-13
Adolescence	rs144286714	2	21412151	T	G	0.174	cg16306978	2	21266953	0.42668	7.51757	0.03349	1.44e-13
Adolescence	rs56143640	2	21476301	G	A	0.312	cg16306978	2	21266953	0.34435	7.51454	0.03061	1.47e-13
Adolescence	rs312049	2	21475944	C	T	0.406	cg25071744	2	21266995	0.31296	7.51363	0.01962	1.48e-13
Adolescence	rs67332771	2	21312210	T	C	0.122	cg16723488	2	21266947	-0.48463	-7.51274	0.04218	1.49e-13
Adolescence	rs312051	2	21429055	C	G	0.161	cg25071744	2	21266995	-0.42699	-7.51061	0.02142	1.51e-13
Adolescence	rs365946	2	21439329	T	G	0.16	cg25071744	2	21266995	-0.42699	-7.51061	0.02142	1.51e-13
Adolescence	rs57289321	2	21428937	D	R	0.195	cg15246511	2	21267212	0.388	7.50957	0.05169	1.52e-13
Adolescence	rs453862	2	21450714	G	A	0.161	cg25071744	2	21266995	-0.42421	-7.50125	0.02357	1.62e-13
Adolescence	rs10166647	2	21460176	C	T	0.408	cg03350299	2	21266960	0.32094	7.4981	0.00561	1.65e-13
Adolescence	rs312031	2	21471649	A	G	0.315	cg03350299	2	21266960	0.33805	7.49532	0.00572	1.69e-13
Adolescence	rs312026	2	21459587	C	G	0.312	cg03350299	2	21266960	0.34009	7.4898	0.00611	1.76e-13
Adolescence	rs34722314	2	21271707	A	T	0.126	cg16723488	2	21266947	-0.47538	-7.48662	0.04143	1.8e-13
Adolescence	rs638988	2	21435271	G	C	0.159	cg25071744	2	21266995	-0.42825	-7.48405	0.0234	1.83e-13
Adolescence	rs139106085	2	21435700	A	C	0.159	cg25071744	2	21266995	-0.42825	-7.48405	0.0234	1.83e-13
Adolescence	rs441169	2	21437028	G	T	0.159	cg25071744	2	21266995	-0.42825	-7.48405	0.0234	1.83e-13
Adolescence	rs10166647	2	21460176	C	T	0.408	cg24309555	2	21266956	0.32107	7.47734	0.0063	1.92e-13
Adolescence	rs144286714	2	21412151	T	G	0.174	cg16723488	2	21266947	0.42385	7.47134	0.0312	2e-13
Adolescence	rs149412333	2	21404245	D	R	0.228	cg03350299	2	21266960	-0.37136	-7.47007	0.00749	2.02e-13
Adolescence	rs13393101	2	21430401	C	T	0.189	cg25071744	2	21266995	0.39199	7.46816	0.02291	2.05e-13
Adolescence	rs200275964	2	21268818	D	R	0.122	cg24309555	2	21266956	-0.48183	-7.4658	0.01139	2.08e-13
Adolescence	rs5829778	2	21423218	I	R	0.283	cg03350299	2	21266960	-0.3466	-7.4574	0.0087	2.21e-13
Adolescence	rs66702176	2	21399973	D	R	0.185	cg00673290	2	21266727	-0.41485	-7.45639	0.04082	2.23e-13
Adolescence	rs312945	2	21328825	A	G	0.286	cg24309555	2	21266956	-0.34672	-7.45277	0.00792	2.29e-13
Adolescence	rs6146672	2	21442944	D	R	0.188	cg16306978	2	21266953	0.40976	7.45198	0.03766	2.3e-13
Adolescence	rs7566040	2	21454424	G	T	0.405	cg03350299	2	21266960	0.31985	7.44362	0.00549	2.44e-13
Adolescence	rs13420469	2	21449034	C	T	0.237	cg07636176	2	21267175	0.35994	7.44181	0.04918	2.47e-13
Adolescence	rs949790	2	21449987	A	G	0.237	cg07636176	2	21267175	0.35994	7.44181	0.04918	2.47e-13
Adolescence	rs11900894	2	21450264	C	A	0.237	cg07636176	2	21267175	0.35994	7.44181	0.04918	2.47e-13
Adolescence	rs60403635	2	21272778	C	T	0.038	cg07636176	2	21267175	-0.79417	-7.44137	0.1126	2.48e-13
Adolescence	rs62133387	2	21410890	T	C	0.24	cg03350299	2	21266960	-0.36221	-7.43972	0.00728	2.51e-13
Adolescence	rs7566040	2	21454424	G	T	0.405	cg24309555	2	21266956	0.32045	7.43466	0.00626	2.6e-13
Adolescence	rs62122481	2	21216815	A	C	0.391	cg00673290	2	21266727	0.33069	7.43279	0.03059	2.63e-13
Adolescence	rs540897	2	21383982	A	G	0.186	cg00673290	2	21266727	-0.40827	-7.43193	0.03719	2.65e-13
Adolescence	rs97458	2	21327635	G	A	0.287	cg24309555	2	21266956	-0.34595	-7.43175	0.00791	2.65e-13
Adolescence	rs12720816	2	21239667	C	T	0.394	cg00673290	2	21266727	0.32881	7.42644	0.03156	2.76e-13
Adolescence	rs312053	2	21428049	C	A	0.229	cg03350299	2	21266960	-0.36677	-7.42548	0.0078	2.77e-13
Adolescence	rs312052	2	21428185	G	A	0.229	cg03350299	2	21266960	-0.36677	-7.42548	0.0078	2.77e-13
Adolescence	rs76935526	2	21386353	T	C	0.184	cg07636176	2	21267175	0.39675	7.42538	0.06397	2.78e-13
Adolescence	rs79524936	2	21389323	C	T	0.184	cg07636176	2	21267175	0.39675	7.42538	0.06397	2.78e-13
Adolescence	rs503105	2	21315664	C	T	0.18	cg00673290	2	21266727	-0.41616	-7.41931	0.04179	2.9e-13
Adolescence	rs12720816	2	21239667	C	T	0.394	cg03350299	2	21266960	0.32318	7.41928	0.00604	2.9e-13
Adolescence	rs312046	2	21474487	T	C	0.316	cg25123895	2	21267113	0.33716	7.41363	0.01834	3.02e-13
Adolescence	rs75014690	2	21396363	C	T	0.185	cg15246511	2	21267212	0.39357	7.4134	0.04702	3.02e-13
Adolescence	rs78003123	2	21401970	G	A	0.185	cg15246511	2	21267212	0.39357	7.4134	0.04702	3.02e-13
Adolescence	rs57305952	2	21403438	G	A	0.185	cg15246511	2	21267212	0.39357	7.4134	0.04702	3.02e-13
Adolescence	rs76520886	2	21427969	G	A	0.186	cg15246511	2	21267212	0.39165	7.40996	0.05237	3.1e-13
Adolescence	rs75014690	2	21396363	C	T	0.185	cg00673290	2	21266727	0.41221	7.40954	0.02834	3.11e-13
Adolescence	rs78003123	2	21401970	G	A	0.185	cg00673290	2	21266727	0.41221	7.40954	0.02834	3.11e-13
Adolescence	rs57305952	2	21403438	G	A	0.185	cg00673290	2	21266727	0.41221	7.40954	0.02834	3.11e-13
Adolescence	rs6146672	2	21442944	D	R	0.188	cg25123895	2	21267113	0.40346	7.39559	0.02627	3.43e-13
Adolescence	rs312046	2	21474487	T	C	0.316	cg03350299	2	21266960	0.33421	7.39551	0.00571	3.43e-13
Adolescence	rs1712249	2	21385974	T	C	0.226	cg25071744	2	21266995	-0.35819	-7.39485	0.01832	3.45e-13
Adolescence	rs10169543	2	21423989	C	T	0.182	cg00673290	2	21266727	-0.41077	-7.39317	0.03674	3.49e-13
Adolescence	rs34002646	2	21425323	G	A	0.182	cg00673290	2	21266727	-0.41077	-7.39317	0.03674	3.49e-13
Adolescence	rs12712940	2	21426743	A	C	0.182	cg00673290	2	21266727	-0.41077	-7.39317	0.03674	3.49e-13
Adolescence	rs56826296	2	21415728	G	T	0.182	cg00673290	2	21266727	-0.41027	-7.38362	0.03887	3.73e-13
Adolescence	rs569014	2	21415763	G	A	0.182	cg00673290	2	21266727	-0.41027	-7.38362	0.03887	3.73e-13
Adolescence	rs527259	2	21416019	G	C	0.182	cg00673290	2	21266727	-0.41027	-7.38362	0.03887	3.73e-13
Adolescence	rs202036472	2	21416347	D	R	0.182	cg00673290	2	21266727	-0.41027	-7.38362	0.03887	3.73e-13
Adolescence	rs539845	2	21416614	A	T	0.182	cg00673290	2	21266727	-0.41027	-7.38362	0.03887	3.73e-13
Adolescence	rs56232451	2	21424673	G	C	0.185	cg15246511	2	21267212	0.39058	7.3809	0.05237	3.8e-13
Adolescence	rs386397	2	21451827	A	G	0.306	cg25123895	2	21267113	0.34197	7.38056	0.01733	3.81e-13
Adolescence	rs35239705	2	21451687	A	G	0.174	cg16306978	2	21266953	-0.42045	-7.37676	0.03539	3.91e-13
Adolescence	rs144286714	2	21412151	T	G	0.174	cg03350299	2	21266960	0.41262	7.36946	0.00468	4.12e-13
Adolescence	rs76889510	2	21415466	A	G	0.184	cg15246511	2	21267212	0.39183	7.36699	0.04712	4.19e-13
Adolescence	rs56143640	2	21476301	G	A	0.312	cg24309555	2	21266956	0.33382	7.36213	0.00605	4.34e-13
Adolescence	rs60403635	2	21272778	C	T	0.038	cg15246511	2	21267212	-0.78196	-7.35523	0.08677	4.56e-13
Adolescence	rs11903224	2	21431361	C	G	0.237	cg07636176	2	21267175	0.35599	7.35509	0.04914	4.56e-13
Adolescence	rs146928072	2	21436164	C	T	0.238	cg07636176	2	21267175	0.35599	7.35509	0.04914	4.56e-13
Adolescence	rs13423380	2	21351326	T	C	0.127	cg00673290	2	21266727	-0.46865	-7.35415	0.04128	4.59e-13
Adolescence	rs312049	2	21475944	C	T	0.406	cg16306978	2	21266953	0.31978	7.35138	0.02876	4.68e-13
Adolescence	rs6146672	2	21442944	D	R	0.188	cg25071744	2	21266995	0.38779	7.34867	0.02166	4.77e-13
Adolescence	rs1820914	2	21402957	T	C	0.185	cg15246511	2	21267212	0.39043	7.34654	0.04692	4.84e-13
Adolescence	rs113156606	2	21414638	C	T	0.185	cg15246511	2	21267212	0.39043	7.34654	0.04692	4.84e-13
Adolescence	rs10181679	2	21463518	A	C	0.311	cg03350299	2	21266960	0.33346	7.3428	0.00607	4.97e-13
Adolescence	rs312043	2	21464421	A	G	0.311	cg03350299	2	21266960	0.33346	7.3428	0.00607	4.97e-13
Adolescence	rs312042	2	21464498	G	A	0.311	cg03350299	2	21266960	0.33346	7.3428	0.00607	4.97e-13
Adolescence	rs12618122	2	21417978	G	C	0.282	cg25071744	2	21266995	-0.33222	-7.34046	0.01985	5.05e-13
Adolescence	rs144545816	2	21413077	A	G	0.287	cg16723488	2	21266947	0.3474	7.3393	0.0253	5.09e-13
Adolescence	rs200657767	2	21414642	I	R	0.287	cg16723488	2	21266947	0.3474	7.3393	0.0253	5.09e-13
Adolescence	rs1712249	2	21385974	T	C	0.226	cg24309555	2	21266956	-0.36656	-7.33923	0.00588	5.1e-13
Adolescence	rs5829778	2	21423218	I	R	0.283	cg25071744	2	21266995	-0.33217	-7.33632	0.02009	5.2e-13
Adolescence	rs17399838	2	21368217	G	A	0.126	cg00673290	2	21266727	-0.47114	-7.33404	0.04518	5.29e-13
Adolescence	rs12618122	2	21417978	G	C	0.282	cg03350299	2	21266960	-0.34076	-7.32639	0.00893	5.58e-13
Adolescence	rs693	2	21232195	G	A	0.488	cg16306978	2	21266953	-0.32071	-7.31418	0.02818	6.08e-13
Adolescence	rs1041968	2	21232804	G	A	0.488	cg16306978	2	21266953	-0.32071	-7.31418	0.02818	6.08e-13
Adolescence	rs71435594	2	21309335	T	C	0.076	cg16306978	2	21266953	-0.58603	-7.30559	0.04506	6.45e-13
Adolescence	rs62133387	2	21410890	T	C	0.24	cg25071744	2	21266995	-0.34622	-7.2988	0.01681	6.76e-13
Adolescence	rs312031	2	21471649	A	G	0.315	cg25123895	2	21267113	0.33176	7.29639	0.01816	6.88e-13
Adolescence	rs1820914	2	21402957	T	C	0.185	cg00673290	2	21266727	0.40633	7.29334	0.02821	7.03e-13
Adolescence	rs113156606	2	21414638	C	T	0.185	cg00673290	2	21266727	0.40633	7.29334	0.02821	7.03e-13
Adolescence	rs520861	2	21387239	A	G	0.228	cg25071744	2	21266995	-0.35204	-7.28967	0.01759	7.21e-13
Adolescence	rs312026	2	21459587	C	G	0.312	cg25123895	2	21267113	0.3336	7.28708	0.0178	7.34e-13
Adolescence	rs36040007	2	21464447	D	R	0.21	cg16723488	2	21266947	-0.37956	-7.2856	0.02663	7.42e-13
Adolescence	rs148134238	2	21438682	D	R	0.185	cg15246511	2	21267212	0.38567	7.28228	0.04128	7.59e-13
Adolescence	rs72405792	2	21367696	D	R	0.126	cg00673290	2	21266727	-0.46838	-7.27816	0.04517	7.81e-13
Adolescence	rs34882389	2	21381214	C	A	0.126	cg00673290	2	21266727	-0.46838	-7.27816	0.04517	7.81e-13
Adolescence	rs36018965	2	21383536	A	G	0.126	cg00673290	2	21266727	-0.46838	-7.27816	0.04517	7.81e-13
Adolescence	rs547186	2	21269241	A	T	0.497	cg07636176	2	21267175	-0.30097	-7.26872	0.0385	8.34e-13
Adolescence	rs1713223	2	21271270	A	C	0.498	cg07636176	2	21267175	-0.30203	-7.26824	0.0354	8.37e-13
Adolescence	rs672889	2	21319016	T	G	0.129	cg00673290	2	21266727	-0.46117	-7.25842	0.04175	8.96e-13
Adolescence	rs312049	2	21475944	C	T	0.406	cg03350299	2	21266960	0.31127	7.25719	0.00569	9.04e-13
Adolescence	rs34872576	2	21326183	G	A	0.126	cg00673290	2	21266727	-0.46683	-7.25259	0.04517	9.33e-13
Adolescence	rs34916112	2	21339285	A	C	0.126	cg00673290	2	21266727	-0.46683	-7.25259	0.04517	9.33e-13
Adolescence	rs10177017	2	21471750	A	G	0.15	cg25071744	2	21266995	-0.41781	-7.25201	0.02506	9.37e-13
Adolescence	rs67144154	2	21448511	G	A	0.116	cg16306978	2	21266953	-0.48467	-7.24944	0.03525	9.54e-13
Adolescence	rs200522680	2	21313384	I	R	0.142	cg00673290	2	21266727	0.45407	7.24752	0.01126	9.67e-13
Adolescence	rs10177492	2	21463922	T	C	0.15	cg25071744	2	21266995	-0.41755	-7.24002	0.02518	1.02e-12
Adolescence	rs521685	2	21401631	C	T	0.229	cg25071744	2	21266995	-0.34974	-7.2399	0.01762	1.02e-12
Adolescence	rs521755	2	21401700	G	A	0.229	cg25071744	2	21266995	-0.34974	-7.2399	0.01762	1.02e-12
Adolescence	rs522761	2	21401789	T	C	0.229	cg25071744	2	21266995	-0.34974	-7.2399	0.01762	1.02e-12
Adolescence	rs522661	2	21401801	G	A	0.229	cg25071744	2	21266995	-0.34974	-7.2399	0.01762	1.02e-12
Adolescence	rs200796611	2	21401902	I	R	0.229	cg25071744	2	21266995	-0.34974	-7.2399	0.01762	1.02e-12
Adolescence	rs6146672	2	21442944	D	R	0.188	cg03350299	2	21266960	0.39274	7.23631	0.00588	1.05e-12
Adolescence	rs66774912	2	21423532	A	G	0.125	cg00673290	2	21266727	-0.4633	-7.235	0.03558	1.05e-12
Adolescence	rs520861	2	21387239	A	G	0.228	cg24309555	2	21266956	-0.36026	-7.23476	0.00601	1.06e-12
Adolescence	rs571468	2	21293914	C	A	0.476	cg25123895	2	21267113	-0.31089	-7.23218	0.01664	1.08e-12
Adolescence	rs521685	2	21401631	C	T	0.229	cg24309555	2	21266956	-0.35997	-7.22945	0.00602	1.1e-12
Adolescence	rs521755	2	21401700	G	A	0.229	cg24309555	2	21266956	-0.35997	-7.22945	0.00602	1.1e-12
Adolescence	rs522761	2	21401789	T	C	0.229	cg24309555	2	21266956	-0.35997	-7.22945	0.00602	1.1e-12
Adolescence	rs522661	2	21401801	G	A	0.229	cg24309555	2	21266956	-0.35997	-7.22945	0.00602	1.1e-12
Adolescence	rs200796611	2	21401902	I	R	0.229	cg24309555	2	21266956	-0.35997	-7.22945	0.00602	1.1e-12
Adolescence	rs56143640	2	21476301	G	A	0.312	cg25123895	2	21267113	0.32838	7.20791	0.01717	1.27e-12
Adolescence	rs535713	2	21414072	G	C	0.228	cg24309555	2	21266956	-0.35885	-7.20373	0.00561	1.31e-12
Adolescence	rs35239705	2	21451687	A	G	0.174	cg16723488	2	21266947	-0.41071	-7.20167	0.02694	1.33e-12
Adolescence	rs76520886	2	21427969	G	A	0.186	cg00673290	2	21266727	0.39952	7.20124	0.02679	1.33e-12
Adolescence	rs72902576	2	21275480	G	T	0.039	cg15246511	2	21267212	-0.76057	-7.19304	0.08674	1.41e-12
Adolescence	rs72902579	2	21276008	C	T	0.039	cg15246511	2	21267212	-0.76057	-7.19304	0.08674	1.41e-12
Adolescence	rs56232451	2	21424673	G	C	0.185	cg00673290	2	21266727	0.39943	7.19232	0.02679	1.42e-12
Adolescence	rs72902576	2	21275480	G	T	0.039	cg07636176	2	21267175	-0.76338	-7.18634	0.11259	1.48e-12
Adolescence	rs72902579	2	21276008	C	T	0.039	cg07636176	2	21267175	-0.76338	-7.18634	0.11259	1.48e-12
Adolescence	rs952275	2	21221399	T	G	0.488	cg16306978	2	21266953	-0.3154	-7.18553	0.02597	1.48e-12
Adolescence	rs10577088	2	21310264	D	R	0.479	cg25123895	2	21267113	-0.30946	-7.18276	0.01646	1.51e-12
Adolescence	rs675430	2	21311785	C	A	0.479	cg25123895	2	21267113	-0.30946	-7.18276	0.01646	1.51e-12
Adolescence	rs563476	2	21313676	T	C	0.479	cg25123895	2	21267113	-0.30946	-7.18276	0.01646	1.51e-12
Adolescence	rs503662	2	21414142	T	C	0.229	cg24309555	2	21266956	-0.35647	-7.17982	0.0058	1.54e-12
Adolescence	rs149621822	2	21426683	D	R	0.179	cg00673290	2	21266727	-0.40193	-7.17203	0.03623	1.63e-12
Adolescence	rs202148081	2	21426688	D	R	0.179	cg00673290	2	21266727	-0.40193	-7.17203	0.03623	1.63e-12
Adolescence	rs5829778	2	21423218	I	R	0.283	cg24309555	2	21266956	-0.335	-7.16907	0.00675	1.66e-12
Adolescence	rs531819	2	21263639	T	G	0.139	cg00673290	2	21266727	-0.44169	-7.16851	0.03175	1.67e-12
Adolescence	rs1800481	2	21267210	A	G	0.139	cg00673290	2	21266727	-0.44169	-7.16851	0.03175	1.67e-12
Adolescence	rs585967	2	21270554	A	C	0.139	cg00673290	2	21266727	-0.44169	-7.16851	0.03175	1.67e-12
Adolescence	rs1713222	2	21271323	A	G	0.139	cg00673290	2	21266727	-0.44169	-7.16851	0.03175	1.67e-12
Adolescence	rs145286195	2	21289490	D	R	0.477	cg25123895	2	21267113	-0.30785	-7.16752	0.01658	1.68e-12
Adolescence	rs594677	2	21293006	T	C	0.477	cg25123895	2	21267113	-0.30785	-7.16752	0.01658	1.68e-12
Adolescence	rs10221742	2	21419650	A	G	0.206	cg00673290	2	21266727	-0.37374	-7.16664	0.03709	1.69e-12
Adolescence	rs76889510	2	21415466	A	G	0.184	cg00673290	2	21266727	0.39997	7.16469	0.02818	1.71e-12
Adolescence	rs473448	2	21402456	T	G	0.228	cg24309555	2	21266956	-0.35818	-7.16422	0.00586	1.72e-12
Adolescence	rs476124	2	21402716	G	C	0.228	cg24309555	2	21266956	-0.35818	-7.16422	0.00586	1.72e-12
Adolescence	rs477964	2	21402916	A	G	0.228	cg24309555	2	21266956	-0.35818	-7.16422	0.00586	1.72e-12
Adolescence	rs478148	2	21402981	T	C	0.228	cg24309555	2	21266956	-0.35818	-7.16422	0.00586	1.72e-12
Adolescence	rs505813	2	21403639	T	C	0.228	cg24309555	2	21266956	-0.35818	-7.16422	0.00586	1.72e-12
Adolescence	rs507627	2	21403829	T	C	0.228	cg24309555	2	21266956	-0.35818	-7.16422	0.00586	1.72e-12
Adolescence	rs473770	2	21403965	G	A	0.228	cg24309555	2	21266956	-0.35818	-7.16422	0.00586	1.72e-12
Adolescence	rs499560	2	21404398	A	G	0.228	cg24309555	2	21266956	-0.35818	-7.16422	0.00586	1.72e-12
Adolescence	rs499757	2	21404468	T	A	0.228	cg24309555	2	21266956	-0.35818	-7.16422	0.00586	1.72e-12
Adolescence	rs537810	2	21404816	T	A	0.228	cg24309555	2	21266956	-0.35818	-7.16422	0.00586	1.72e-12
Adolescence	rs538862	2	21404980	A	G	0.228	cg24309555	2	21266956	-0.35818	-7.16422	0.00586	1.72e-12
Adolescence	rs567071	2	21405790	G	A	0.228	cg24309555	2	21266956	-0.35818	-7.16422	0.00586	1.72e-12
Adolescence	rs480484	2	21406048	T	C	0.228	cg24309555	2	21266956	-0.35818	-7.16422	0.00586	1.72e-12
Adolescence	rs484268	2	21406471	T	C	0.228	cg24309555	2	21266956	-0.35818	-7.16422	0.00586	1.72e-12
Adolescence	rs484399	2	21406568	C	A	0.228	cg24309555	2	21266956	-0.35818	-7.16422	0.00586	1.72e-12
Adolescence	rs488922	2	21406942	C	T	0.228	cg24309555	2	21266956	-0.35818	-7.16422	0.00586	1.72e-12
Adolescence	rs489022	2	21406981	T	C	0.228	cg24309555	2	21266956	-0.35818	-7.16422	0.00586	1.72e-12
Adolescence	rs312937	2	21408841	T	C	0.228	cg24309555	2	21266956	-0.35818	-7.16422	0.00586	1.72e-12
Adolescence	rs312938	2	21409165	A	G	0.228	cg24309555	2	21266956	-0.35818	-7.16422	0.00586	1.72e-12
Adolescence	rs312939	2	21409548	G	A	0.228	cg24309555	2	21266956	-0.35818	-7.16422	0.00586	1.72e-12
Adolescence	rs312940	2	21409717	A	G	0.228	cg24309555	2	21266956	-0.35818	-7.16422	0.00586	1.72e-12
Adolescence	rs167499	2	21410404	T	C	0.228	cg24309555	2	21266956	-0.35818	-7.16422	0.00586	1.72e-12
Adolescence	rs56143640	2	21476301	G	A	0.312	cg03350299	2	21266960	0.32437	7.1636	0.00541	1.73e-12
Adolescence	rs7578527	2	21422403	A	G	0.179	cg00673290	2	21266727	-0.39961	-7.15877	0.03832	1.78e-12
Adolescence	rs142614082	2	21436451	A	G	0.186	cg15246511	2	21267212	0.37905	7.15302	0.04098	1.86e-12
Adolescence	rs473448	2	21402456	T	G	0.228	cg25071744	2	21266995	-0.34683	-7.14901	0.01684	1.91e-12
Adolescence	rs476124	2	21402716	G	C	0.228	cg25071744	2	21266995	-0.34683	-7.14901	0.01684	1.91e-12
Adolescence	rs477964	2	21402916	A	G	0.228	cg25071744	2	21266995	-0.34683	-7.14901	0.01684	1.91e-12
Adolescence	rs478148	2	21402981	T	C	0.228	cg25071744	2	21266995	-0.34683	-7.14901	0.01684	1.91e-12
Adolescence	rs505813	2	21403639	T	C	0.228	cg25071744	2	21266995	-0.34683	-7.14901	0.01684	1.91e-12
Adolescence	rs507627	2	21403829	T	C	0.228	cg25071744	2	21266995	-0.34683	-7.14901	0.01684	1.91e-12
Adolescence	rs473770	2	21403965	G	A	0.228	cg25071744	2	21266995	-0.34683	-7.14901	0.01684	1.91e-12
Adolescence	rs499560	2	21404398	A	G	0.228	cg25071744	2	21266995	-0.34683	-7.14901	0.01684	1.91e-12
Adolescence	rs499757	2	21404468	T	A	0.228	cg25071744	2	21266995	-0.34683	-7.14901	0.01684	1.91e-12
Adolescence	rs537810	2	21404816	T	A	0.228	cg25071744	2	21266995	-0.34683	-7.14901	0.01684	1.91e-12
Adolescence	rs538862	2	21404980	A	G	0.228	cg25071744	2	21266995	-0.34683	-7.14901	0.01684	1.91e-12
Adolescence	rs567071	2	21405790	G	A	0.228	cg25071744	2	21266995	-0.34683	-7.14901	0.01684	1.91e-12
Adolescence	rs480484	2	21406048	T	C	0.228	cg25071744	2	21266995	-0.34683	-7.14901	0.01684	1.91e-12
Adolescence	rs484268	2	21406471	T	C	0.228	cg25071744	2	21266995	-0.34683	-7.14901	0.01684	1.91e-12
Adolescence	rs484399	2	21406568	C	A	0.228	cg25071744	2	21266995	-0.34683	-7.14901	0.01684	1.91e-12
Adolescence	rs488922	2	21406942	C	T	0.228	cg25071744	2	21266995	-0.34683	-7.14901	0.01684	1.91e-12
Adolescence	rs489022	2	21406981	T	C	0.228	cg25071744	2	21266995	-0.34683	-7.14901	0.01684	1.91e-12
Adolescence	rs312937	2	21408841	T	C	0.228	cg25071744	2	21266995	-0.34683	-7.14901	0.01684	1.91e-12
Adolescence	rs312938	2	21409165	A	G	0.228	cg25071744	2	21266995	-0.34683	-7.14901	0.01684	1.91e-12
Adolescence	rs312939	2	21409548	G	A	0.228	cg25071744	2	21266995	-0.34683	-7.14901	0.01684	1.91e-12
Adolescence	rs312940	2	21409717	A	G	0.228	cg25071744	2	21266995	-0.34683	-7.14901	0.01684	1.91e-12
Adolescence	rs167499	2	21410404	T	C	0.228	cg25071744	2	21266995	-0.34683	-7.14901	0.01684	1.91e-12
Adolescence	rs10181679	2	21463518	A	C	0.311	cg25123895	2	21267113	0.32726	7.14847	0.01695	1.92e-12
Adolescence	rs312043	2	21464421	A	G	0.311	cg25123895	2	21267113	0.32726	7.14847	0.01695	1.92e-12
Adolescence	rs312042	2	21464498	G	A	0.311	cg25123895	2	21267113	0.32726	7.14847	0.01695	1.92e-12
Adolescence	rs10221768	2	21417431	A	C	0.127	cg00673290	2	21266727	-0.45232	-7.13108	0.03842	2.16e-12
Adolescence	rs10177492	2	21463922	T	C	0.15	cg16723488	2	21266947	-0.42825	-7.1191	0.03201	2.34e-12
Adolescence	rs201580360	2	21382103	I	R	0.228	cg16723488	2	21266947	-0.36611	-7.11841	0.0332	2.35e-12
Adolescence	rs634292	2	21279909	T	G	0.477	cg25123895	2	21267113	-0.30659	-7.11789	0.0164	2.36e-12
Adolescence	rs666126	2	21282435	G	A	0.477	cg25123895	2	21267113	-0.30659	-7.11789	0.0164	2.36e-12
Adolescence	rs62122481	2	21216815	A	C	0.391	cg25071744	2	21266995	0.30375	7.11236	0.01608	2.45e-12
Adolescence	rs200038330	2	21289489	D	R	0.469	cg25123895	2	21267113	-0.3065	-7.11129	0.01665	2.47e-12
Adolescence	rs181403065	2	21435831	T	A	0.152	cg25071744	2	21266995	-0.41645	-7.11092	0.01935	2.48e-12
Adolescence	rs72902576	2	21275480	G	T	0.039	cg25123895	2	21267113	-0.78026	-7.10723	0.01802	2.54e-12
Adolescence	rs72902579	2	21276008	C	T	0.039	cg25123895	2	21267113	-0.78026	-7.10723	0.01802	2.54e-12
Adolescence	rs10177017	2	21471750	A	G	0.15	cg16723488	2	21266947	-0.42703	-7.10478	0.03188	2.58e-12
Adolescence	rs67144154	2	21448511	G	A	0.116	cg03350299	2	21266960	-0.4685	-7.104	0.00762	2.6e-12
Adolescence	rs149412333	2	21404245	D	R	0.228	cg24309555	2	21266956	-0.35521	-7.10209	0.00585	2.63e-12
Adolescence	rs7567653	2	21276962	A	G	0.04	cg07636176	2	21267175	-0.74947	-7.09739	0.1126	2.72e-12
Adolescence	rs72902584	2	21278070	C	T	0.04	cg07636176	2	21267175	-0.74947	-7.09739	0.1126	2.72e-12
Adolescence	rs72902590	2	21289068	A	G	0.04	cg07636176	2	21267175	-0.74947	-7.09739	0.1126	2.72e-12
Adolescence	rs57667647	2	21292394	A	G	0.04	cg07636176	2	21267175	-0.74947	-7.09739	0.1126	2.72e-12
Adolescence	rs79428416	2	21293135	T	C	0.04	cg07636176	2	21267175	-0.74947	-7.09739	0.1126	2.72e-12
Adolescence	rs4635554	2	21389659	G	T	0.332	cg25123895	2	21267113	0.32124	7.09661	0.01905	2.73e-12
Adolescence	rs9808284	2	21476247	A	C	0.13	cg25071744	2	21266995	-0.43973	-7.09635	0.03086	2.74e-12
Adolescence	rs664894	2	21297177	A	T	0.477	cg25123895	2	21267113	-0.30524	-7.09512	0.01646	2.76e-12
Adolescence	rs565202	2	21297447	G	A	0.477	cg25123895	2	21267113	-0.30524	-7.09512	0.01646	2.76e-12
Adolescence	rs486936	2	21302824	T	C	0.477	cg25123895	2	21267113	-0.30524	-7.09512	0.01646	2.76e-12
Adolescence	rs666416	2	21304147	A	G	0.477	cg25123895	2	21267113	-0.30524	-7.09512	0.01646	2.76e-12
Adolescence	rs312974	2	21374413	C	T	0.285	cg16723488	2	21266947	-0.33497	-7.08234	0.03311	3.01e-12
Adolescence	rs312976	2	21375346	G	A	0.285	cg16723488	2	21266947	-0.33497	-7.08234	0.03311	3.01e-12
Adolescence	rs200275964	2	21268818	D	R	0.122	cg25071744	2	21266995	-0.44472	-7.07961	0.02779	3.07e-12
Adolescence	rs200522680	2	21313384	I	R	0.142	cg16306978	2	21266953	0.44337	7.07765	0.01234	3.11e-12
Adolescence	rs62133387	2	21410890	T	C	0.24	cg24309555	2	21266956	-0.34663	-7.07732	0.00541	3.12e-12
Adolescence	rs7567653	2	21276962	A	G	0.04	cg25123895	2	21267113	-0.77125	-7.06997	0.01802	3.27e-12
Adolescence	rs72902584	2	21278070	C	T	0.04	cg25123895	2	21267113	-0.77125	-7.06997	0.01802	3.27e-12
Adolescence	rs72902590	2	21289068	A	G	0.04	cg25123895	2	21267113	-0.77125	-7.06997	0.01802	3.27e-12
Adolescence	rs57667647	2	21292394	A	G	0.04	cg25123895	2	21267113	-0.77125	-7.06997	0.01802	3.27e-12
Adolescence	rs79428416	2	21293135	T	C	0.04	cg25123895	2	21267113	-0.77125	-7.06997	0.01802	3.27e-12
Adolescence	rs481069	2	21281856	G	A	0.126	cg00673290	2	21266727	-0.45208	-7.06856	0.04175	3.31e-12
Adolescence	rs201468010	2	21379143	D	R	0.223	cg16723488	2	21266947	-0.36394	-7.06138	0.03253	3.47e-12
Adolescence	rs535713	2	21414072	G	C	0.228	cg25071744	2	21266995	-0.34163	-7.05994	0.01678	3.51e-12
Adolescence	rs57289321	2	21428937	D	R	0.195	cg07636176	2	21267175	0.36759	7.05577	0.05267	3.61e-12
Adolescence	rs79192207	2	21417897	C	G	0.18	cg00673290	2	21266727	0.40048	7.05464	0.03774	3.63e-12
Adolescence	rs638988	2	21435271	G	C	0.159	cg16723488	2	21266947	-0.42192	-7.05095	0.02537	3.73e-12
Adolescence	rs139106085	2	21435700	A	C	0.159	cg16723488	2	21266947	-0.42192	-7.05095	0.02537	3.73e-12
Adolescence	rs441169	2	21437028	G	T	0.159	cg16723488	2	21266947	-0.42192	-7.05095	0.02537	3.73e-12
Adolescence	rs200522680	2	21313384	I	R	0.142	cg24309555	2	21266956	0.43644	7.04825	0.00032	3.8e-12
Adolescence	rs12618122	2	21417978	G	C	0.282	cg24309555	2	21266956	-0.32942	-7.04526	0.0069	3.87e-12
Adolescence	rs4596008	2	21417576	T	C	0.18	cg00673290	2	21266727	-0.39339	-7.04477	0.03838	3.89e-12
Adolescence	rs67599264	2	21418083	A	G	0.18	cg00673290	2	21266727	-0.39339	-7.04477	0.03838	3.89e-12
Adolescence	rs36047821	2	21418719	A	C	0.18	cg00673290	2	21266727	-0.39339	-7.04477	0.03838	3.89e-12
Adolescence	rs34125138	2	21418756	G	A	0.18	cg00673290	2	21266727	-0.39339	-7.04477	0.03838	3.89e-12
Adolescence	rs11897480	2	21419320	G	C	0.18	cg00673290	2	21266727	-0.39339	-7.04477	0.03838	3.89e-12
Adolescence	rs10221876	2	21419809	T	A	0.18	cg00673290	2	21266727	-0.39339	-7.04477	0.03838	3.89e-12
Adolescence	rs1878512	2	21420358	A	C	0.18	cg00673290	2	21266727	-0.39339	-7.04477	0.03838	3.89e-12
Adolescence	rs17041988	2	21420697	G	A	0.18	cg00673290	2	21266727	-0.39339	-7.04477	0.03838	3.89e-12
Adolescence	rs12712923	2	21421782	A	C	0.18	cg00673290	2	21266727	-0.39339	-7.04477	0.03838	3.89e-12
Adolescence	rs7567653	2	21276962	A	G	0.04	cg15246511	2	21267212	-0.74052	-7.0416	0.08672	3.97e-12
Adolescence	rs72902584	2	21278070	C	T	0.04	cg15246511	2	21267212	-0.74052	-7.0416	0.08672	3.97e-12
Adolescence	rs72902590	2	21289068	A	G	0.04	cg15246511	2	21267212	-0.74052	-7.0416	0.08672	3.97e-12
Adolescence	rs57667647	2	21292394	A	G	0.04	cg15246511	2	21267212	-0.74052	-7.0416	0.08672	3.97e-12
Adolescence	rs79428416	2	21293135	T	C	0.04	cg15246511	2	21267212	-0.74052	-7.0416	0.08672	3.97e-12
Adolescence	rs503662	2	21414142	T	C	0.229	cg25071744	2	21266995	-0.33934	-7.03609	0.01684	4.12e-12
Adolescence	rs58298631	2	21477012	G	T	0.378	cg16723488	2	21266947	0.31039	7.03086	0.02964	4.27e-12
Adolescence	rs7567217	2	21303470	C	T	0.127	cg00673290	2	21266727	-0.44826	-7.02429	0.04175	4.46e-12
Adolescence	rs149412333	2	21404245	D	R	0.228	cg25071744	2	21266995	-0.34091	-7.02062	0.01684	4.58e-12
Adolescence	rs312049	2	21475944	C	T	0.406	cg24309555	2	21266956	0.30247	7.01707	0.00614	4.69e-12
Adolescence	rs71435593	2	21302020	C	T	0.123	cg00673290	2	21266727	-0.45474	-7.01363	0.04519	4.8e-12
Adolescence	rs7605304	2	21445569	A	G	0.189	cg00673290	2	21266727	0.38582	7.01141	0.03134	4.87e-12
Adolescence	rs75429038	2	21445743	C	T	0.189	cg00673290	2	21266727	0.38582	7.01141	0.03134	4.87e-12
Adolescence	rs13412147	2	21448887	T	C	0.189	cg00673290	2	21266727	0.38582	7.01141	0.03134	4.87e-12
Adolescence	rs140053693	2	21449278	D	R	0.189	cg00673290	2	21266727	0.38582	7.01141	0.03134	4.87e-12
Adolescence	rs1079457	2	21449498	G	C	0.189	cg00673290	2	21266727	0.38582	7.01141	0.03134	4.87e-12
Adolescence	rs312051	2	21429055	C	G	0.161	cg16723488	2	21266947	-0.41669	-7.00474	0.02584	5.09e-12
Adolescence	rs365946	2	21439329	T	G	0.16	cg16723488	2	21266947	-0.41669	-7.00474	0.02584	5.09e-12
Adolescence	rs367162	2	21444779	C	T	0.161	cg16723488	2	21266947	-0.41412	-6.99863	0.02535	5.31e-12
Adolescence	rs380240	2	21446653	T	C	0.161	cg16723488	2	21266947	-0.41412	-6.99863	0.02535	5.31e-12
Adolescence	rs71435601	2	21428289	G	A	0.127	cg00673290	2	21266727	-0.44696	-6.99323	0.0356	5.5e-12
Adolescence	rs403880	2	21449408	T	C	0.161	cg16723488	2	21266947	-0.41412	-6.99276	0.0253	5.52e-12
Adolescence	rs432483	2	21450349	G	C	0.161	cg16723488	2	21266947	-0.41412	-6.99276	0.0253	5.52e-12
Adolescence	rs431493	2	21450824	G	C	0.161	cg16723488	2	21266947	-0.41412	-6.99276	0.0253	5.52e-12
Adolescence	rs13011615	2	21274167	T	A	0.126	cg00673290	2	21266727	-0.44804	-6.99227	0.04171	5.54e-12
Adolescence	rs428696	2	21448607	T	C	0.161	cg16723488	2	21266947	-0.41588	-6.99036	0.02503	5.61e-12
Adolescence	rs17707013	13	87162864	C	T	0.069	cg25071744	2	21266995	-0.45628	-5.37645	0.02833	9.87e-08
Adolescence	rs35913552	2	21272896	A	G	0.128	cg00673290	2	21266727	-0.44433	-6.98834	0.03892	5.69e-12
Adolescence	rs12720816	2	21239667	C	T	0.394	cg16723488	2	21266947	0.30973	6.98714	0.0261	5.74e-12
Adolescence	rs60403635	2	21272778	C	T	0.038	cg25123895	2	21267113	-0.7728	-6.985	0.01802	5.82e-12
Adolescence	rs13393101	2	21430401	C	T	0.189	cg00673290	2	21266727	0.38441	6.98412	0.03134	5.85e-12
Adolescence	rs693	2	21232195	G	A	0.488	cg24309555	2	21266956	-0.30318	-6.97767	0.00568	6.11e-12
Adolescence	rs1041968	2	21232804	G	A	0.488	cg24309555	2	21266956	-0.30318	-6.97767	0.00568	6.11e-12
Adolescence	rs403880	2	21449408	T	C	0.161	cg24309555	2	21266956	-0.40869	-6.97622	0.00758	6.17e-12
Adolescence	rs432483	2	21450349	G	C	0.161	cg24309555	2	21266956	-0.40869	-6.97622	0.00758	6.17e-12
Adolescence	rs431493	2	21450824	G	C	0.161	cg24309555	2	21266956	-0.40869	-6.97622	0.00758	6.17e-12
Adolescence	rs79192207	2	21417897	C	G	0.18	cg07636176	2	21267175	0.37986	6.97518	0.06331	6.22e-12
Adolescence	rs6756284	2	21309856	A	G	0.126	cg00673290	2	21266727	-0.44679	-6.97151	0.04171	6.37e-12
Adolescence	rs10166647	2	21460176	C	T	0.408	cg00673290	2	21266727	0.30449	6.96824	0.02102	6.51e-12
Adolescence	rs312051	2	21429055	C	G	0.161	cg24309555	2	21266956	-0.40987	-6.96398	0.00742	6.7e-12
Adolescence	rs365946	2	21439329	T	G	0.16	cg24309555	2	21266956	-0.40987	-6.96398	0.00742	6.7e-12
Adolescence	rs57289321	2	21428937	D	R	0.195	cg00673290	2	21266727	0.37869	6.96371	0.03147	6.71e-12
Adolescence	rs367162	2	21444779	C	T	0.161	cg24309555	2	21266956	-0.40748	-6.96039	0.00753	6.87e-12
Adolescence	rs380240	2	21446653	T	C	0.161	cg24309555	2	21266956	-0.40748	-6.96039	0.00753	6.87e-12
Adolescence	rs28562532	2	21309122	T	C	0.126	cg00673290	2	21266727	-0.44541	-6.95816	0.04175	6.97e-12
Adolescence	rs638988	2	21435271	G	C	0.159	cg24309555	2	21266956	-0.41206	-6.95714	0.00828	7.02e-12
Adolescence	rs139106085	2	21435700	A	C	0.159	cg24309555	2	21266956	-0.41206	-6.95714	0.00828	7.02e-12
Adolescence	rs441169	2	21437028	G	T	0.159	cg24309555	2	21266956	-0.41206	-6.95714	0.00828	7.02e-12
Adolescence	rs148134238	2	21438682	D	R	0.185	cg00673290	2	21266727	0.38694	6.95417	0.03741	7.16e-12
Adolescence	rs7566040	2	21454424	G	T	0.405	cg00673290	2	21266727	0.30457	6.94483	0.02091	7.62e-12
Adolescence	rs11127270	2	21277786	A	G	0.475	cg25123895	2	21267113	-0.2996	-6.94406	0.01634	7.66e-12
Adolescence	rs645456	2	21317485	T	C	0.372	cg15246511	2	21267212	-0.29394	-6.94084	0.03712	7.83e-12
Adolescence	rs428696	2	21448607	T	C	0.161	cg24309555	2	21266956	-0.40855	-6.94024	0.00703	7.86e-12
Adolescence	rs453862	2	21450714	G	A	0.161	cg16723488	2	21266947	-0.41064	-6.93647	0.02535	8.06e-12
Adolescence	rs5829778	2	21423218	I	R	0.283	cg16723488	2	21266947	-0.32815	-6.93261	0.02672	8.27e-12
Adolescence	rs312049	2	21475944	C	T	0.406	cg00673290	2	21266727	0.30302	6.932	0.01869	8.3e-12
Adolescence	rs10177017	2	21471750	A	G	0.15	cg16306978	2	21266953	-0.41741	-6.92903	0.03576	8.47e-12
Adolescence	rs10205292	2	21426171	T	A	0.227	cg24309555	2	21266956	-0.34465	-6.92597	0.00528	8.64e-12
Adolescence	rs453862	2	21450714	G	A	0.161	cg24309555	2	21266956	-0.4055	-6.92447	0.00759	8.73e-12
Adolescence	rs7605304	2	21445569	A	G	0.189	cg15246511	2	21267212	0.36356	6.91783	0.04089	9.13e-12
Adolescence	rs75429038	2	21445743	C	T	0.189	cg15246511	2	21267212	0.36356	6.91783	0.04089	9.13e-12
Adolescence	rs13412147	2	21448887	T	C	0.189	cg15246511	2	21267212	0.36356	6.91783	0.04089	9.13e-12
Adolescence	rs140053693	2	21449278	D	R	0.189	cg15246511	2	21267212	0.36356	6.91783	0.04089	9.13e-12
Adolescence	rs1079457	2	21449498	G	C	0.189	cg15246511	2	21267212	0.36356	6.91783	0.04089	9.13e-12
Adolescence	rs67332771	2	21312210	T	C	0.122	cg00673290	2	21266727	-0.44935	-6.91574	0.04518	9.25e-12
Adolescence	rs10177492	2	21463922	T	C	0.15	cg16306978	2	21266953	-0.41695	-6.91409	0.03576	9.36e-12
Adolescence	rs12468735	2	21275825	A	G	0.474	cg25123895	2	21267113	-0.29785	-6.90647	0.01582	9.85e-12
Adolescence	rs11892073	2	21276401	A	G	0.474	cg25123895	2	21267113	-0.29785	-6.90647	0.01582	9.85e-12
Adolescence	rs148134238	2	21438682	D	R	0.185	cg07636176	2	21267175	0.36852	6.90584	0.06216	9.89e-12
Adolescence	rs142614082	2	21436451	A	G	0.186	cg00673290	2	21266727	0.3841	6.90365	0.03739	1e-11
Adolescence	rs4635554	2	21389659	G	T	0.332	cg07636176	2	21267175	0.30299	6.9027	0.03849	1.01e-11
Adolescence	rs312974	2	21374413	C	T	0.285	cg00673290	2	21266727	-0.32765	-6.90143	0.03618	1.02e-11
Adolescence	rs312976	2	21375346	G	A	0.285	cg00673290	2	21266727	-0.32765	-6.90143	0.03618	1.02e-11
Adolescence	rs312945	2	21328825	A	G	0.286	cg16723488	2	21266947	-0.32562	-6.89136	0.03281	1.09e-11
Adolescence	rs312951	2	21337403	A	C	0.364	cg15246511	2	21267212	-0.29328	-6.88505	0.03635	1.14e-11
Adolescence	rs312952	2	21337857	C	G	0.364	cg15246511	2	21267212	-0.29328	-6.88505	0.03635	1.14e-11
Adolescence	rs58298631	2	21477012	G	T	0.378	cg00673290	2	21266727	0.30479	6.87937	0.0203	1.18e-11
Adolescence	rs181403065	2	21435831	T	A	0.152	cg16723488	2	21266947	-0.42047	-6.87731	0.0253	1.2e-11
Adolescence	rs67175476	2	21319809	D	R	0.371	cg15246511	2	21267212	-0.29159	-6.872	0.03663	1.24e-11
Adolescence	rs581998	2	21320481	A	G	0.371	cg15246511	2	21267212	-0.29159	-6.872	0.03663	1.24e-11
Adolescence	rs312942	2	21321866	T	C	0.371	cg15246511	2	21267212	-0.29159	-6.872	0.03663	1.24e-11
Adolescence	rs97458	2	21327635	G	A	0.287	cg16723488	2	21266947	-0.3248	-6.87003	0.03271	1.25e-11
Adolescence	rs952275	2	21221399	T	G	0.488	cg24309555	2	21266956	-0.29844	-6.86248	0.00568	1.32e-11
Adolescence	rs13393101	2	21430401	C	T	0.189	cg15246511	2	21267212	0.36077	6.86169	0.04089	1.33e-11
Adolescence	rs9808284	2	21476247	A	C	0.13	cg16723488	2	21266947	-0.44364	-6.85781	0.03215	1.36e-11
Adolescence	rs312949	2	21334283	G	C	0.376	cg15246511	2	21267212	-0.28861	-6.84643	0.03712	1.47e-11
Adolescence	rs312955	2	21341893	A	G	0.376	cg15246511	2	21267212	-0.28861	-6.84643	0.03712	1.47e-11
Adolescence	rs62122481	2	21216815	A	C	0.391	cg16723488	2	21266947	0.30525	6.8447	0.02552	1.48e-11
Adolescence	rs12477249	2	21400661	A	G	0.334	cg25123895	2	21267113	0.30923	6.8411	0.01527	1.52e-11
Adolescence	rs312945	2	21328825	A	G	0.286	cg00673290	2	21266727	-0.3241	-6.84043	0.03623	1.53e-11
Adolescence	rs693	2	21232195	G	A	0.488	cg00673290	2	21266727	-0.30148	-6.83935	0.02445	1.54e-11
Adolescence	rs1041968	2	21232804	G	A	0.488	cg00673290	2	21266727	-0.30148	-6.83935	0.02445	1.54e-11
Adolescence	rs76520886	2	21427969	G	A	0.186	cg07636176	2	21267175	0.36477	6.83844	0.04716	1.55e-11
Adolescence	rs75014690	2	21396363	C	T	0.185	cg07636176	2	21267175	0.36594	6.82939	0.05508	1.64e-11
Adolescence	rs78003123	2	21401970	G	A	0.185	cg07636176	2	21267175	0.36594	6.82939	0.05508	1.64e-11
Adolescence	rs57305952	2	21403438	G	A	0.185	cg07636176	2	21267175	0.36594	6.82939	0.05508	1.64e-11
Adolescence	rs312029	2	21461730	C	G	0.124	cg03350299	2	21266960	-0.43354	-6.82338	0.00947	1.71e-11
Adolescence	rs76889510	2	21415466	A	G	0.184	cg07636176	2	21267175	0.36593	6.81872	0.05523	1.76e-11
Adolescence	rs181436666	2	21317969	T	C	0.265	cg00673290	2	21266727	0.33337	6.81838	0.02634	1.77e-11
Adolescence	rs534100	2	21321158	G	A	0.37	cg15246511	2	21267212	-0.2892	-6.81684	0.0367	1.78e-11
Adolescence	rs142614082	2	21436451	A	G	0.186	cg07636176	2	21267175	0.36344	6.80873	0.06205	1.88e-11
Adolescence	rs62122481	2	21216815	A	C	0.391	cg25123895	2	21267113	0.30117	6.80182	0.02027	1.97e-11
Adolescence	rs10166144	2	21453733	G	A	0.123	cg03350299	2	21266960	-0.43378	-6.7981	0.00946	2.02e-11
Adolescence	rs56232451	2	21424673	G	C	0.185	cg07636176	2	21267175	0.36292	6.79503	0.04758	2.06e-11
Adolescence	rs6146672	2	21442944	D	R	0.188	cg00673290	2	21266727	0.3761	6.79332	0.02771	2.08e-11
Adolescence	rs312053	2	21428049	C	A	0.229	cg24309555	2	21266956	-0.33825	-6.79281	0.00528	2.09e-11
Adolescence	rs312052	2	21428185	G	A	0.229	cg24309555	2	21266956	-0.33825	-6.79281	0.00528	2.09e-11
Adolescence	rs12720816	2	21239667	C	T	0.394	cg15246511	2	21267212	0.28842	6.79127	0.03684	2.11e-11
Adolescence	rs1820914	2	21402957	T	C	0.185	cg07636176	2	21267175	0.3637	6.78174	0.05523	2.25e-11
Adolescence	rs113156606	2	21414638	C	T	0.185	cg07636176	2	21267175	0.3637	6.78174	0.05523	2.25e-11
Adolescence	rs200275964	2	21268818	D	R	0.122	cg16723488	2	21266947	-0.4449	-6.78088	0.03985	2.26e-11
Adolescence	rs97458	2	21327635	G	A	0.287	cg00673290	2	21266727	-0.32147	-6.77889	0.03607	2.29e-11
Adolescence	rs10166144	2	21453733	G	A	0.123	cg16723488	2	21266947	-0.43843	-6.77438	0.03168	2.36e-11
Adolescence	rs181403065	2	21435831	T	A	0.152	cg24309555	2	21266956	-0.40947	-6.76551	0.00828	2.5e-11
Adolescence	rs10205292	2	21426171	T	A	0.227	cg25071744	2	21266995	-0.327	-6.76414	0.01675	2.52e-11
Adolescence	rs144286714	2	21412151	T	G	0.174	cg00673290	2	21266727	0.38669	6.76145	0.02113	2.57e-11
Adolescence	rs144286714	2	21412151	T	G	0.174	cg15246511	2	21267212	0.36871	6.75534	0.03689	2.67e-11
Adolescence	rs952275	2	21221399	T	G	0.488	cg00673290	2	21266727	-0.29794	-6.75443	0.02445	2.69e-11
Adolescence	rs312053	2	21428049	C	A	0.229	cg25071744	2	21266995	-0.32516	-6.72672	0.01668	3.22e-11
Adolescence	rs312052	2	21428185	G	A	0.229	cg25071744	2	21266995	-0.32516	-6.72672	0.01668	3.22e-11
Adolescence	rs148187585	2	21322856	I	R	0.372	cg15246511	2	21267212	-0.28574	-6.71848	0.03663	3.4e-11
Adolescence	rs312946	2	21328999	C	T	0.372	cg15246511	2	21267212	-0.28574	-6.71848	0.03663	3.4e-11
Adolescence	rs312947	2	21330769	C	T	0.372	cg15246511	2	21267212	-0.28574	-6.71848	0.03663	3.4e-11
Adolescence	rs312948	2	21330973	G	A	0.372	cg15246511	2	21267212	-0.28574	-6.71848	0.03663	3.4e-11
Adolescence	rs34059915	2	21331489	D	R	0.372	cg15246511	2	21267212	-0.28574	-6.71848	0.03663	3.4e-11
Adolescence	rs312950	2	21336222	A	T	0.372	cg15246511	2	21267212	-0.28574	-6.71848	0.03663	3.4e-11
Adolescence	rs312954	2	21340303	A	G	0.372	cg15246511	2	21267212	-0.28574	-6.71848	0.03663	3.4e-11
Adolescence	rs312956	2	21342092	C	T	0.372	cg15246511	2	21267212	-0.28574	-6.71848	0.03663	3.4e-11
Adolescence	rs312957	2	21342312	G	A	0.372	cg15246511	2	21267212	-0.28574	-6.71848	0.03663	3.4e-11
Adolescence	rs312958	2	21342924	T	C	0.372	cg15246511	2	21267212	-0.28574	-6.71848	0.03663	3.4e-11
Adolescence	rs312959	2	21346577	C	G	0.372	cg15246511	2	21267212	-0.28574	-6.71848	0.03663	3.4e-11
Adolescence	rs34326968	2	21348147	D	R	0.372	cg15246511	2	21267212	-0.28574	-6.71848	0.03663	3.4e-11
Adolescence	rs312961	2	21349199	C	T	0.372	cg15246511	2	21267212	-0.28574	-6.71848	0.03663	3.4e-11
Adolescence	rs312962	2	21349822	G	T	0.372	cg15246511	2	21267212	-0.28574	-6.71848	0.03663	3.4e-11
Adolescence	rs312963	2	21351281	A	G	0.372	cg15246511	2	21267212	-0.28574	-6.71848	0.03663	3.4e-11
Adolescence	rs67144154	2	21448511	G	A	0.116	cg25071744	2	21266995	-0.43171	-6.70554	0.0222	3.69e-11
Adolescence	rs12618122	2	21417978	G	C	0.282	cg16723488	2	21266947	-0.31768	-6.70204	0.02693	3.78e-11
Adolescence	rs312964	2	21355430	G	T	0.372	cg15246511	2	21267212	-0.28502	-6.69643	0.03651	3.92e-11
Adolescence	rs70939083	2	21467872	D	R	0.124	cg16723488	2	21266947	-0.4324	-6.69535	0.03168	3.95e-11
Adolescence	rs13387827	2	21469152	T	G	0.124	cg16723488	2	21266947	-0.4324	-6.69535	0.03168	3.95e-11
Adolescence	rs13398007	2	21469336	T	C	0.124	cg16723488	2	21266947	-0.4324	-6.69535	0.03168	3.95e-11
Adolescence	rs10170323	2	21469738	T	G	0.124	cg16723488	2	21266947	-0.4324	-6.69535	0.03168	3.95e-11
Adolescence	rs10183198	2	21470987	T	C	0.124	cg16723488	2	21266947	-0.4324	-6.69535	0.03168	3.95e-11
Adolescence	rs10166144	2	21453733	G	A	0.123	cg16306978	2	21266953	-0.43377	-6.69237	0.03527	4.02e-11
Adolescence	rs520354	2	21259612	G	A	0.482	cg25123895	2	21267113	-0.29044	-6.69077	0.01962	4.07e-11
Adolescence	rs1469513	2	21259562	C	T	0.435	cg15246511	2	21267212	0.27991	6.68594	0.03475	4.2e-11
Adolescence	rs6548011	2	21277932	T	C	0.353	cg25123895	2	21267113	0.53766	12.7632	0.03628	3.29e-34
Adolescence	rs386397	2	21451827	A	G	0.306	cg15246511	2	21267212	0.29935	6.66536	0.03389	4.79e-11
Adolescence	rs10166144	2	21453733	G	A	0.123	cg25071744	2	21266995	-0.41407	-6.66108	0.02296	4.93e-11
Adolescence	rs7605304	2	21445569	A	G	0.189	cg07636176	2	21267175	0.35227	6.65928	0.04758	4.99e-11
Adolescence	rs75429038	2	21445743	C	T	0.189	cg07636176	2	21267175	0.35227	6.65928	0.04758	4.99e-11
Adolescence	rs13412147	2	21448887	T	C	0.189	cg07636176	2	21267175	0.35227	6.65928	0.04758	4.99e-11
Adolescence	rs140053693	2	21449278	D	R	0.189	cg07636176	2	21267175	0.35227	6.65928	0.04758	4.99e-11
Adolescence	rs1079457	2	21449498	G	C	0.189	cg07636176	2	21267175	0.35227	6.65928	0.04758	4.99e-11
Adolescence	rs312029	2	21461730	C	G	0.124	cg16723488	2	21266947	-0.42953	-6.65798	0.03171	5.03e-11
Adolescence	rs34641795	2	21332678	I	R	0.372	cg15246511	2	21267212	-0.28266	-6.6558	0.03621	5.1e-11
Adolescence	rs78158108	2	21296537	C	G	0.086	cg25123895	2	21267113	0.49963	6.65323	0.02126	5.18e-11
Adolescence	rs597331	2	21262427	A	G	0.481	cg25123895	2	21267113	-0.28891	-6.65207	0.01979	5.22e-11
Adolescence	rs312033	2	21470596	A	G	0.307	cg25071744	2	21266995	-0.2961	-6.65026	0.02069	5.28e-11
Adolescence	rs393495	2	21450207	C	T	0.397	cg15246511	2	21267212	0.23403	5.44311	0.03342	6.89e-08
Adolescence	rs13392272	2	21217490	T	C	0.494	cg16306978	2	21266953	0.29016	6.61442	0.02288	6.66e-11
Adolescence	rs70939083	2	21467872	D	R	0.124	cg16306978	2	21266953	-0.4275	-6.60955	0.03531	6.87e-11
Adolescence	rs13387827	2	21469152	T	G	0.124	cg16306978	2	21266953	-0.4275	-6.60955	0.03531	6.87e-11
Adolescence	rs13398007	2	21469336	T	C	0.124	cg16306978	2	21266953	-0.4275	-6.60955	0.03531	6.87e-11
Adolescence	rs10170323	2	21469738	T	G	0.124	cg16306978	2	21266953	-0.4275	-6.60955	0.03531	6.87e-11
Adolescence	rs10183198	2	21470987	T	C	0.124	cg16306978	2	21266953	-0.4275	-6.60955	0.03531	6.87e-11
Adolescence	rs10177017	2	21471750	A	G	0.15	cg03350299	2	21266960	-0.39269	-6.59948	0.00941	7.33e-11
Adolescence	rs62122481	2	21216815	A	C	0.391	cg03350299	2	21266960	0.29069	6.59768	0.005	7.41e-11
Adolescence	rs70939083	2	21467872	D	R	0.124	cg03350299	2	21266960	-0.42037	-6.59573	0.00935	7.5e-11
Adolescence	rs13387827	2	21469152	T	G	0.124	cg03350299	2	21266960	-0.42037	-6.59573	0.00935	7.5e-11
Adolescence	rs13398007	2	21469336	T	C	0.124	cg03350299	2	21266960	-0.42037	-6.59573	0.00935	7.5e-11
Adolescence	rs10170323	2	21469738	T	G	0.124	cg03350299	2	21266960	-0.42037	-6.59573	0.00935	7.5e-11
Adolescence	rs10183198	2	21470987	T	C	0.124	cg03350299	2	21266960	-0.42037	-6.59573	0.00935	7.5e-11
Adolescence	rs78120576	2	21318633	C	T	0.338	cg16306978	2	21266953	0.47421	10.766	0.03988	2.12e-25
Adolescence	rs312966	2	21360583	G	A	0.377	cg15246511	2	21267212	-0.27789	-6.58759	0.03651	7.91e-11
Adolescence	rs312029	2	21461730	C	G	0.124	cg16306978	2	21266953	-0.42551	-6.58648	0.03529	7.96e-11
Adolescence	rs312029	2	21461730	C	G	0.124	cg25071744	2	21266995	-0.40792	-6.58503	0.02291	8.04e-11
Adolescence	rs10177492	2	21463922	T	C	0.15	cg03350299	2	21266960	-0.39217	-6.5837	0.00946	8.1e-11
Adolescence	rs312033	2	21470596	A	G	0.307	cg16306978	2	21266953	-0.30569	-6.57951	0.03204	8.32e-11
Adolescence	rs11901649	2	21250223	A	G	0.437	cg15246511	2	21267212	0.27559	6.57474	0.03461	8.58e-11
Adolescence	rs36040007	2	21464447	D	R	0.21	cg24309555	2	21266956	-0.34064	-6.57379	0.00749	8.63e-11
Adolescence	rs34722314	2	21271707	A	T	0.126	cg00673290	2	21266727	-0.42137	-6.57242	0.03841	8.71e-11
Adolescence	rs111826230	2	21378453	G	A	0.089	cg25123895	2	21267113	0.4892	6.5716	0.0212	8.76e-11
Adolescence	rs9808284	2	21476247	A	C	0.13	cg16306978	2	21266953	-0.42623	-6.56859	0.0401	8.93e-11
Adolescence	rs56212928	2	21272763	D	R	0.352	cg25123895	2	21267113	0.52741	12.4824	0.03705	6.58e-33
Adolescence	rs111596512	2	21414873	T	C	0.256	cg25123895	2	21267113	0.32268	6.55596	0.01647	9.68e-11
Adolescence	rs679899	2	21250914	A	G	0.48	cg25123895	2	21267113	-0.28454	-6.55381	0.01979	9.81e-11
Adolescence	rs312967	2	21367516	G	A	0.373	cg15246511	2	21267212	-0.27814	-6.55324	0.03639	9.84e-11
Adolescence	rs312969	2	21369568	C	T	0.373	cg15246511	2	21267212	-0.27814	-6.55324	0.03639	9.84e-11
Adolescence	rs312971	2	21371550	C	T	0.373	cg15246511	2	21267212	-0.27814	-6.55324	0.03639	9.84e-11
Adolescence	rs312972	2	21372590	C	T	0.373	cg15246511	2	21267212	-0.27814	-6.55324	0.03639	9.84e-11
Adolescence	rs312973	2	21372677	A	G	0.373	cg15246511	2	21267212	-0.27814	-6.55324	0.03639	9.84e-11
Adolescence	rs312975	2	21374535	A	G	0.373	cg15246511	2	21267212	-0.27814	-6.55324	0.03639	9.84e-11
Adolescence	rs312977	2	21376312	T	G	0.373	cg15246511	2	21267212	-0.27814	-6.55324	0.03639	9.84e-11
Adolescence	rs312978	2	21376584	G	A	0.373	cg15246511	2	21267212	-0.27814	-6.55324	0.03639	9.84e-11
Adolescence	rs520354	2	21259612	G	A	0.482	cg07636176	2	21267175	-0.2757	-6.55295	0.03871	9.86e-11
Adolescence	rs13393101	2	21430401	C	T	0.189	cg07636176	2	21267175	0.34688	6.55199	0.04716	9.92e-11
Adolescence	rs10577088	2	21310264	D	R	0.479	cg07636176	2	21267175	-0.27408	-6.53751	0.03084	1.09e-10
Adolescence	rs675430	2	21311785	C	A	0.479	cg07636176	2	21267175	-0.27408	-6.53751	0.03084	1.09e-10
Adolescence	rs563476	2	21313676	T	C	0.479	cg07636176	2	21267175	-0.27408	-6.53751	0.03084	1.09e-10
Adolescence	rs597331	2	21262427	A	G	0.481	cg07636176	2	21267175	-0.27436	-6.51779	0.03906	1.23e-10
Adolescence	rs7571647	2	21476634	A	G	0.102	cg16723488	2	21266947	-0.45959	-6.51666	0.03204	1.24e-10
Adolescence	rs67144154	2	21448511	G	A	0.116	cg16723488	2	21266947	-0.43735	-6.50951	0.0258	1.3e-10
Adolescence	rs62122481	2	21216815	A	C	0.391	cg07636176	2	21267175	0.27944	6.50373	0.04264	1.35e-10
Adolescence	rs386397	2	21451827	A	G	0.306	cg07636176	2	21267175	0.29375	6.50298	0.02954	1.35e-10
Adolescence	rs200793994	2	21463326	I	R	0.305	cg25071744	2	21266995	-0.29077	-6.49442	0.02027	1.43e-10
Adolescence	rs34478966	2	21463327	I	R	0.305	cg25071744	2	21266995	-0.29077	-6.49442	0.02027	1.43e-10
Adolescence	rs312045	2	21463986	C	T	0.294	cg16306978	2	21266953	-0.30434	-6.49237	0.0317	1.45e-10
Adolescence	rs6146672	2	21442944	D	R	0.188	cg15246511	2	21267212	0.34371	6.49062	0.04378	1.46e-10
Adolescence	rs312951	2	21337403	A	C	0.364	cg07636176	2	21267175	-0.27846	-6.48781	0.0285	1.49e-10
Adolescence	rs312952	2	21337857	C	G	0.364	cg07636176	2	21267175	-0.27846	-6.48781	0.0285	1.49e-10
Adolescence	rs7566030	2	21282578	G	C	0.353	cg25123895	2	21267113	0.53545	12.7319	0.03622	4.61e-34
Adolescence	rs312968	2	21368451	A	G	0.373	cg15246511	2	21267212	-0.27579	-6.48188	0.03597	1.55e-10
Adolescence	rs12714264	2	21265518	T	A	0.12	cg00673290	2	21266727	-0.42759	-6.47757	0.0355	1.59e-10
Adolescence	rs312046	2	21474487	T	C	0.316	cg07636176	2	21267175	0.28716	6.47342	0.02848	1.63e-10
Adolescence	rs67175476	2	21319809	D	R	0.371	cg07636176	2	21267175	-0.27674	-6.47281	0.02923	1.64e-10
Adolescence	rs581998	2	21320481	A	G	0.371	cg07636176	2	21267175	-0.27674	-6.47281	0.02923	1.64e-10
Adolescence	rs312942	2	21321866	T	C	0.371	cg07636176	2	21267175	-0.27674	-6.47281	0.02923	1.64e-10
Adolescence	rs571468	2	21293914	C	A	0.476	cg07636176	2	21267175	-0.27098	-6.47247	0.03123	1.64e-10
Adolescence	rs645456	2	21317485	T	C	0.372	cg07636176	2	21267175	-0.27623	-6.46969	0.02959	1.67e-10
Adolescence	rs200793994	2	21463326	I	R	0.305	cg16306978	2	21266953	-0.30155	-6.4563	0.03178	1.82e-10
Adolescence	rs34478966	2	21463327	I	R	0.305	cg16306978	2	21266953	-0.30155	-6.4563	0.03178	1.82e-10
Adolescence	rs534100	2	21321158	G	A	0.37	cg07636176	2	21267175	-0.2757	-6.4512	0.02943	1.88e-10
Adolescence	rs181129338	2	21432768	G	A	0.252	cg25123895	2	21267113	0.32683	6.44799	0.02611	1.92e-10
Adolescence	rs13392272	2	21217490	T	C	0.494	cg00673290	2	21266727	0.28363	6.44777	0.02232	1.92e-10
Adolescence	rs70939083	2	21467872	D	R	0.124	cg25071744	2	21266995	-0.39999	-6.44147	0.0229	2e-10
Adolescence	rs13387827	2	21469152	T	G	0.124	cg25071744	2	21266995	-0.39999	-6.44147	0.0229	2e-10
Adolescence	rs13398007	2	21469336	T	C	0.124	cg25071744	2	21266995	-0.39999	-6.44147	0.0229	2e-10
Adolescence	rs10170323	2	21469738	T	G	0.124	cg25071744	2	21266995	-0.39999	-6.44147	0.0229	2e-10
Adolescence	rs10183198	2	21470987	T	C	0.124	cg25071744	2	21266995	-0.39999	-6.44147	0.0229	2e-10
Adolescence	rs35239705	2	21451687	A	G	0.174	cg24309555	2	21266956	-0.36536	-6.43904	0.00479	2.03e-10
Adolescence	rs35239705	2	21451687	A	G	0.174	cg25071744	2	21266995	-0.35417	-6.43277	0.0192	2.11e-10
Adolescence	rs200038330	2	21289489	D	R	0.469	cg07636176	2	21267175	-0.26979	-6.43133	0.03084	2.13e-10
Adolescence	rs312026	2	21459587	C	G	0.312	cg15246511	2	21267212	0.28559	6.42956	0.0329	2.15e-10
Adolescence	rs312026	2	21459587	C	G	0.312	cg07636176	2	21267175	0.28681	6.42763	0.02828	2.18e-10
Adolescence	rs138023688	2	21379814	D	R	0.372	cg15246511	2	21267212	-0.27409	-6.42671	0.03639	2.19e-10
Adolescence	rs67144154	2	21448511	G	A	0.116	cg24309555	2	21266956	-0.42722	-6.42486	0.0047	2.22e-10
Adolescence	rs71435594	2	21309335	T	C	0.076	cg03350299	2	21266960	-0.51097	-6.42087	0.0131	2.27e-10
Adolescence	rs144286714	2	21412151	T	G	0.174	cg07636176	2	21267175	0.35269	6.41602	0.03359	2.34e-10
Adolescence	rs145286195	2	21289490	D	R	0.477	cg07636176	2	21267175	-0.26833	-6.41514	0.03084	2.35e-10
Adolescence	rs594677	2	21293006	T	C	0.477	cg07636176	2	21267175	-0.26833	-6.41514	0.03084	2.35e-10
Adolescence	rs200522680	2	21313384	I	R	0.142	cg03350299	2	21266960	0.39748	6.40701	0.00407	2.48e-10
Adolescence	rs200275964	2	21268818	D	R	0.122	cg00673290	2	21266727	-0.42255	-6.40697	0.03543	2.48e-10
Adolescence	rs6146672	2	21442944	D	R	0.188	cg07636176	2	21267175	0.34099	6.40593	0.04015	2.49e-10
Adolescence	rs10199768	2	21244000	T	G	0.442	cg15246511	2	21267212	0.26777	6.39301	0.03563	2.7e-10
Adolescence	rs12477249	2	21400661	A	G	0.334	cg07636176	2	21267175	0.28071	6.3925	0.03714	2.71e-10
Adolescence	rs10177492	2	21463922	T	C	0.15	cg00673290	2	21266727	-0.38755	-6.39162	0.03757	2.73e-10
Adolescence	rs10181679	2	21463518	A	C	0.311	cg15246511	2	21267212	0.28328	6.38258	0.03257	2.88e-10
Adolescence	rs312043	2	21464421	A	G	0.311	cg15246511	2	21267212	0.28328	6.38258	0.03257	2.88e-10
Adolescence	rs312042	2	21464498	G	A	0.311	cg15246511	2	21267212	0.28328	6.38258	0.03257	2.88e-10
Adolescence	rs679899	2	21250914	A	G	0.48	cg07636176	2	21267175	-0.2686	-6.38184	0.03892	2.9e-10
Adolescence	rs634292	2	21279909	T	G	0.477	cg07636176	2	21267175	-0.26752	-6.37855	0.03123	2.96e-10
Adolescence	rs666126	2	21282435	G	A	0.477	cg07636176	2	21267175	-0.26752	-6.37855	0.03123	2.96e-10
Adolescence	rs10177017	2	21471750	A	G	0.15	cg00673290	2	21266727	-0.38618	-6.37407	0.03756	3.04e-10
Adolescence	rs72723983	4	138765231	T	C	0.206	cg15246511	2	21267212	-0.29797	-5.73607	0.01274	1.35e-08
Adolescence	rs148187585	2	21322856	I	R	0.372	cg07636176	2	21267175	-0.2727	-6.366	0.02921	3.2e-10
Adolescence	rs312946	2	21328999	C	T	0.372	cg07636176	2	21267175	-0.2727	-6.366	0.02921	3.2e-10
Adolescence	rs312947	2	21330769	C	T	0.372	cg07636176	2	21267175	-0.2727	-6.366	0.02921	3.2e-10
Adolescence	rs312948	2	21330973	G	A	0.372	cg07636176	2	21267175	-0.2727	-6.366	0.02921	3.2e-10
Adolescence	rs34059915	2	21331489	D	R	0.372	cg07636176	2	21267175	-0.2727	-6.366	0.02921	3.2e-10
Adolescence	rs312950	2	21336222	A	T	0.372	cg07636176	2	21267175	-0.2727	-6.366	0.02921	3.2e-10
Adolescence	rs312954	2	21340303	A	G	0.372	cg07636176	2	21267175	-0.2727	-6.366	0.02921	3.2e-10
Adolescence	rs312956	2	21342092	C	T	0.372	cg07636176	2	21267175	-0.2727	-6.366	0.02921	3.2e-10
Adolescence	rs312957	2	21342312	G	A	0.372	cg07636176	2	21267175	-0.2727	-6.366	0.02921	3.2e-10
Adolescence	rs312958	2	21342924	T	C	0.372	cg07636176	2	21267175	-0.2727	-6.366	0.02921	3.2e-10
Adolescence	rs312959	2	21346577	C	G	0.372	cg07636176	2	21267175	-0.2727	-6.366	0.02921	3.2e-10
Adolescence	rs34326968	2	21348147	D	R	0.372	cg07636176	2	21267175	-0.2727	-6.366	0.02921	3.2e-10
Adolescence	rs312961	2	21349199	C	T	0.372	cg07636176	2	21267175	-0.2727	-6.366	0.02921	3.2e-10
Adolescence	rs312962	2	21349822	G	T	0.372	cg07636176	2	21267175	-0.2727	-6.366	0.02921	3.2e-10
Adolescence	rs312963	2	21351281	A	G	0.372	cg07636176	2	21267175	-0.2727	-6.366	0.02921	3.2e-10
Adolescence	rs4305231	2	21111034	T	C	0.356	cg16723488	2	21266947	-0.28852	-6.36478	0.02496	3.22e-10
Adolescence	rs312949	2	21334283	G	C	0.376	cg07636176	2	21267175	-0.27015	-6.35581	0.02885	3.41e-10
Adolescence	rs312955	2	21341893	A	G	0.376	cg07636176	2	21267175	-0.27015	-6.35581	0.02885	3.41e-10
Adolescence	rs312031	2	21471649	A	G	0.315	cg07636176	2	21267175	0.28172	6.3527	0.02795	3.47e-10
Adolescence	rs312045	2	21463986	C	T	0.294	cg03350299	2	21266960	-0.29351	-6.34824	0.00682	3.57e-10
Adolescence	rs7421442	2	21411649	A	G	0.335	cg25071744	2	21266995	-0.24416	-5.56404	0.0111	3.55e-08
Adolescence	rs10181679	2	21463518	A	C	0.311	cg07636176	2	21267175	0.28286	6.34212	0.02807	3.71e-10
Adolescence	rs312043	2	21464421	A	G	0.311	cg07636176	2	21267175	0.28286	6.34212	0.02807	3.71e-10
Adolescence	rs312042	2	21464498	G	A	0.311	cg07636176	2	21267175	0.28286	6.34212	0.02807	3.71e-10
Adolescence	rs312046	2	21474487	T	C	0.316	cg15246511	2	21267212	0.2802	6.33925	0.03152	3.78e-10
Adolescence	rs7571647	2	21476634	A	G	0.102	cg16306978	2	21266953	-0.44803	-6.33902	0.03972	3.78e-10
Adolescence	rs664894	2	21297177	A	T	0.477	cg07636176	2	21267175	-0.2653	-6.33222	0.03084	3.94e-10
Adolescence	rs565202	2	21297447	G	A	0.477	cg07636176	2	21267175	-0.2653	-6.33222	0.03084	3.94e-10
Adolescence	rs486936	2	21302824	T	C	0.477	cg07636176	2	21267175	-0.2653	-6.33222	0.03084	3.94e-10
Adolescence	rs666416	2	21304147	A	G	0.477	cg07636176	2	21267175	-0.2653	-6.33222	0.03084	3.94e-10
Adolescence	rs4075673	2	21150787	T	C	0.463	cg24309555	2	21266956	0.2678	6.32619	0.00467	4.09e-10
Adolescence	rs200522680	2	21313384	I	R	0.142	cg25123895	2	21267113	0.39492	6.32072	0.02508	4.23e-10
Adolescence	rs1712249	2	21385974	T	C	0.226	cg16723488	2	21266947	-0.32158	-6.3183	0.02038	4.3e-10
Adolescence	rs5829778	2	21423218	I	R	0.283	cg00673290	2	21266727	-0.30096	-6.31372	0.03305	4.42e-10
Adolescence	rs520861	2	21387239	A	G	0.228	cg16723488	2	21266947	-0.31987	-6.30851	0.01983	4.57e-10
Adolescence	rs34641795	2	21332678	I	R	0.372	cg07636176	2	21267175	-0.26964	-6.30402	0.02883	4.69e-10
Adolescence	rs79697494	2	21106599	G	C	0.362	cg25071744	2	21266995	-0.27189	-6.30253	0.01896	4.74e-10
Adolescence	rs147826086	2	21108159	G	A	0.362	cg25071744	2	21266995	-0.27189	-6.30253	0.01896	4.74e-10
Adolescence	rs312964	2	21355430	G	T	0.372	cg07636176	2	21267175	-0.27025	-6.30209	0.02906	4.75e-10
Adolescence	rs79697494	2	21106599	G	C	0.362	cg16723488	2	21266947	-0.28326	-6.30112	0.02332	4.78e-10
Adolescence	rs147826086	2	21108159	G	A	0.362	cg16723488	2	21266947	-0.28326	-6.30112	0.02332	4.78e-10
Adolescence	rs58298631	2	21477012	G	T	0.378	cg25071744	2	21266995	0.26842	6.30065	0.01578	4.79e-10
Adolescence	rs71435594	2	21309335	T	C	0.076	cg24309555	2	21266956	-0.50304	-6.29639	0.01159	4.92e-10
Adolescence	rs72902576	2	21275480	G	T	0.039	cg16306978	2	21266953	-0.70099	-6.29285	0.10211	5.03e-10
Adolescence	rs72902579	2	21276008	C	T	0.039	cg16306978	2	21266953	-0.70099	-6.29285	0.10211	5.03e-10
Adolescence	rs312033	2	21470596	A	G	0.307	cg16723488	2	21266947	-0.29272	-6.29264	0.01977	5.03e-10
Adolescence	rs4503953	2	21105335	A	G	0.361	cg25071744	2	21266995	-0.27032	-6.28882	0.01872	5.15e-10
Adolescence	rs312033	2	21470596	A	G	0.307	cg03350299	2	21266960	-0.28835	-6.2856	0.00612	5.26e-10
Adolescence	rs7567653	2	21276962	A	G	0.04	cg16306978	2	21266953	-0.69412	-6.27189	0.10237	5.72e-10
Adolescence	rs72902584	2	21278070	C	T	0.04	cg16306978	2	21266953	-0.69412	-6.27189	0.10237	5.72e-10
Adolescence	rs72902590	2	21289068	A	G	0.04	cg16306978	2	21266953	-0.69412	-6.27189	0.10237	5.72e-10
Adolescence	rs57667647	2	21292394	A	G	0.04	cg16306978	2	21266953	-0.69412	-6.27189	0.10237	5.72e-10
Adolescence	rs79428416	2	21293135	T	C	0.04	cg16306978	2	21266953	-0.69412	-6.27189	0.10237	5.72e-10
Adolescence	rs312031	2	21471649	A	G	0.315	cg15246511	2	21267212	0.27668	6.26346	0.03168	6.02e-10
Adolescence	rs76622701	2	21239884	T	A	0.391	cg16306978	2	21266953	0.27866	6.26166	0.02574	6.09e-10
Adolescence	rs62133387	2	21410890	T	C	0.24	cg16723488	2	21266947	-0.31183	-6.25844	0.01933	6.21e-10
Adolescence	rs521685	2	21401631	C	T	0.229	cg16723488	2	21266947	-0.31673	-6.24441	0.01978	6.77e-10
Adolescence	rs521755	2	21401700	G	A	0.229	cg16723488	2	21266947	-0.31673	-6.24441	0.01978	6.77e-10
Adolescence	rs522761	2	21401789	T	C	0.229	cg16723488	2	21266947	-0.31673	-6.24441	0.01978	6.77e-10
Adolescence	rs522661	2	21401801	G	A	0.229	cg16723488	2	21266947	-0.31673	-6.24441	0.01978	6.77e-10
Adolescence	rs200796611	2	21401902	I	R	0.229	cg16723488	2	21266947	-0.31673	-6.24441	0.01978	6.77e-10
Adolescence	rs71435594	2	21309335	T	C	0.076	cg25071744	2	21266995	-0.48386	-6.23945	0.0237	6.97e-10
Adolescence	rs693	2	21232195	G	A	0.488	cg25071744	2	21266995	-0.26414	-6.23048	0.01565	7.37e-10
Adolescence	rs1041968	2	21232804	G	A	0.488	cg25071744	2	21266995	-0.26414	-6.23048	0.01565	7.37e-10
Adolescence	rs76622701	2	21239884	T	A	0.391	cg00673290	2	21266727	0.27775	6.23043	0.02522	7.37e-10
Adolescence	rs1367120	2	21386304	T	C	0.182	cg24309555	2	21266956	-0.55726	-10.3791	0.01218	8.06e-24
Adolescence	rs4503953	2	21105335	A	G	0.361	cg16723488	2	21266947	-0.27897	-6.22562	0.02358	7.59e-10
Adolescence	rs11127270	2	21277786	A	G	0.475	cg07636176	2	21267175	-0.26135	-6.22261	0.03178	7.73e-10
Adolescence	rs201468010	2	21379143	D	R	0.223	cg00673290	2	21266727	-0.32327	-6.21783	0.03543	7.96e-10
Adolescence	rs4503953	2	21105335	A	G	0.361	cg00673290	2	21266727	-0.27914	-6.21418	0.0251	8.14e-10
Adolescence	rs200522680	2	21313384	I	R	0.142	cg16723488	2	21266947	0.39129	6.21084	0.00954	8.3e-10
Adolescence	rs13392272	2	21217490	T	C	0.494	cg24309555	2	21266956	0.27004	6.21056	0.00522	8.32e-10
Adolescence	rs56143640	2	21476301	G	A	0.312	cg07636176	2	21267175	0.27598	6.20919	0.02758	8.39e-10
Adolescence	rs541041	2	21294975	G	A	0.167	cg07636176	2	21267175	-0.34276	-6.20659	0.05398	8.52e-10
Adolescence	rs7571647	2	21476634	A	G	0.102	cg25071744	2	21266995	-0.42063	-6.20054	0.02559	8.84e-10
Adolescence	rs7567653	2	21276962	A	G	0.04	cg24309555	2	21266956	-0.67718	-6.18793	0.01772	9.54e-10
Adolescence	rs72902584	2	21278070	C	T	0.04	cg24309555	2	21266956	-0.67718	-6.18793	0.01772	9.54e-10
Adolescence	rs72902590	2	21289068	A	G	0.04	cg24309555	2	21266956	-0.67718	-6.18793	0.01772	9.54e-10
Adolescence	rs57667647	2	21292394	A	G	0.04	cg24309555	2	21266956	-0.67718	-6.18793	0.01772	9.54e-10
Adolescence	rs79428416	2	21293135	T	C	0.04	cg24309555	2	21266956	-0.67718	-6.18793	0.01772	9.54e-10
Adolescence	rs4076525	2	21151917	T	C	0.266	cg25071744	2	21266995	0.25921	5.55425	0.01035	3.75e-08
Adolescence	rs535713	2	21414072	G	C	0.228	cg16723488	2	21266947	-0.31322	-6.1704	0.01971	1.06e-09
Adolescence	rs36040007	2	21464447	D	R	0.21	cg00673290	2	21266727	-0.32495	-6.16963	0.03514	1.07e-09
Adolescence	rs79697494	2	21106599	G	C	0.362	cg00673290	2	21266727	-0.27822	-6.16867	0.02516	1.07e-09
Adolescence	rs147826086	2	21108159	G	A	0.362	cg00673290	2	21266727	-0.27822	-6.16867	0.02516	1.07e-09
Adolescence	rs4075673	2	21150787	T	C	0.463	cg00673290	2	21266727	0.26479	6.16513	0.02181	1.1e-09
Adolescence	rs515135	2	21286057	T	C	0.166	cg07636176	2	21267175	-0.34073	-6.16356	0.05402	1.11e-09
Adolescence	rs563290	2	21288226	G	A	0.166	cg07636176	2	21267175	-0.34073	-6.16356	0.05402	1.11e-09
Adolescence	rs562338	2	21288321	A	G	0.166	cg07636176	2	21267175	-0.34073	-6.16356	0.05402	1.11e-09
Adolescence	rs581411	2	21289432	G	A	0.166	cg07636176	2	21267175	-0.34073	-6.16356	0.05402	1.11e-09
Adolescence	rs580889	2	21290067	C	T	0.166	cg07636176	2	21267175	-0.34073	-6.16356	0.05402	1.11e-09
Adolescence	rs548145	2	21291312	T	C	0.166	cg07636176	2	21267175	-0.34073	-6.16356	0.05402	1.11e-09
Adolescence	rs668948	2	21291529	G	A	0.166	cg07636176	2	21267175	-0.34073	-6.16356	0.05402	1.11e-09
Adolescence	rs201027918	2	21293334	I	R	0.166	cg07636176	2	21267175	-0.34073	-6.16356	0.05402	1.11e-09
Adolescence	rs200793994	2	21463326	I	R	0.305	cg03350299	2	21266960	-0.28381	-6.15397	0.00612	1.17e-09
Adolescence	rs34478966	2	21463327	I	R	0.305	cg03350299	2	21266960	-0.28381	-6.15397	0.00612	1.17e-09
Adolescence	rs72902576	2	21275480	G	T	0.039	cg24309555	2	21266956	-0.67798	-6.15254	0.01768	1.18e-09
Adolescence	rs72902579	2	21276008	C	T	0.039	cg24309555	2	21266956	-0.67798	-6.15254	0.01768	1.18e-09
Adolescence	rs503662	2	21414142	T	C	0.229	cg16723488	2	21266947	-0.31117	-6.15077	0.02009	1.19e-09
Adolescence	rs520354	2	21259612	G	A	0.482	cg15246511	2	21267212	-0.25831	-6.14959	0.03084	1.2e-09
Adolescence	rs473448	2	21402456	T	G	0.228	cg16723488	2	21266947	-0.3131	-6.14662	0.01933	1.23e-09
Adolescence	rs476124	2	21402716	G	C	0.228	cg16723488	2	21266947	-0.3131	-6.14662	0.01933	1.23e-09
Adolescence	rs477964	2	21402916	A	G	0.228	cg16723488	2	21266947	-0.3131	-6.14662	0.01933	1.23e-09
Adolescence	rs478148	2	21402981	T	C	0.228	cg16723488	2	21266947	-0.3131	-6.14662	0.01933	1.23e-09
Adolescence	rs505813	2	21403639	T	C	0.228	cg16723488	2	21266947	-0.3131	-6.14662	0.01933	1.23e-09
Adolescence	rs507627	2	21403829	T	C	0.228	cg16723488	2	21266947	-0.3131	-6.14662	0.01933	1.23e-09
Adolescence	rs473770	2	21403965	G	A	0.228	cg16723488	2	21266947	-0.3131	-6.14662	0.01933	1.23e-09
Adolescence	rs499560	2	21404398	A	G	0.228	cg16723488	2	21266947	-0.3131	-6.14662	0.01933	1.23e-09
Adolescence	rs499757	2	21404468	T	A	0.228	cg16723488	2	21266947	-0.3131	-6.14662	0.01933	1.23e-09
Adolescence	rs537810	2	21404816	T	A	0.228	cg16723488	2	21266947	-0.3131	-6.14662	0.01933	1.23e-09
Adolescence	rs538862	2	21404980	A	G	0.228	cg16723488	2	21266947	-0.3131	-6.14662	0.01933	1.23e-09
Adolescence	rs567071	2	21405790	G	A	0.228	cg16723488	2	21266947	-0.3131	-6.14662	0.01933	1.23e-09
Adolescence	rs480484	2	21406048	T	C	0.228	cg16723488	2	21266947	-0.3131	-6.14662	0.01933	1.23e-09
Adolescence	rs484268	2	21406471	T	C	0.228	cg16723488	2	21266947	-0.3131	-6.14662	0.01933	1.23e-09
Adolescence	rs484399	2	21406568	C	A	0.228	cg16723488	2	21266947	-0.3131	-6.14662	0.01933	1.23e-09
Adolescence	rs488922	2	21406942	C	T	0.228	cg16723488	2	21266947	-0.3131	-6.14662	0.01933	1.23e-09
Adolescence	rs489022	2	21406981	T	C	0.228	cg16723488	2	21266947	-0.3131	-6.14662	0.01933	1.23e-09
Adolescence	rs312937	2	21408841	T	C	0.228	cg16723488	2	21266947	-0.3131	-6.14662	0.01933	1.23e-09
Adolescence	rs312938	2	21409165	A	G	0.228	cg16723488	2	21266947	-0.3131	-6.14662	0.01933	1.23e-09
Adolescence	rs312939	2	21409548	G	A	0.228	cg16723488	2	21266947	-0.3131	-6.14662	0.01933	1.23e-09
Adolescence	rs312940	2	21409717	A	G	0.228	cg16723488	2	21266947	-0.3131	-6.14662	0.01933	1.23e-09
Adolescence	rs167499	2	21410404	T	C	0.228	cg16723488	2	21266947	-0.3131	-6.14662	0.01933	1.23e-09
Adolescence	rs952275	2	21221399	T	G	0.488	cg25071744	2	21266995	-0.26061	-6.14335	0.01565	1.25e-09
Adolescence	rs312966	2	21360583	G	A	0.377	cg07636176	2	21267175	-0.26115	-6.1426	0.02836	1.26e-09
Adolescence	rs312967	2	21367516	G	A	0.373	cg07636176	2	21267175	-0.26265	-6.14163	0.02881	1.26e-09
Adolescence	rs312969	2	21369568	C	T	0.373	cg07636176	2	21267175	-0.26265	-6.14163	0.02881	1.26e-09
Adolescence	rs312971	2	21371550	C	T	0.373	cg07636176	2	21267175	-0.26265	-6.14163	0.02881	1.26e-09
Adolescence	rs312972	2	21372590	C	T	0.373	cg07636176	2	21267175	-0.26265	-6.14163	0.02881	1.26e-09
Adolescence	rs312973	2	21372677	A	G	0.373	cg07636176	2	21267175	-0.26265	-6.14163	0.02881	1.26e-09
Adolescence	rs312975	2	21374535	A	G	0.373	cg07636176	2	21267175	-0.26265	-6.14163	0.02881	1.26e-09
Adolescence	rs312977	2	21376312	T	G	0.373	cg07636176	2	21267175	-0.26265	-6.14163	0.02881	1.26e-09
Adolescence	rs312978	2	21376584	G	A	0.373	cg07636176	2	21267175	-0.26265	-6.14163	0.02881	1.26e-09
Adolescence	rs60403635	2	21272778	C	T	0.038	cg16306978	2	21266953	-0.68917	-6.13828	0.10203	1.29e-09
Adolescence	rs10177017	2	21471750	A	G	0.15	cg24309555	2	21266956	-0.36731	-6.13351	0.00634	1.33e-09
Adolescence	rs12468735	2	21275825	A	G	0.474	cg07636176	2	21267175	-0.25756	-6.13286	0.03232	1.33e-09
Adolescence	rs11892073	2	21276401	A	G	0.474	cg07636176	2	21267175	-0.25756	-6.13286	0.03232	1.33e-09
Adolescence	rs138023688	2	21379814	D	R	0.372	cg07636176	2	21267175	-0.26304	-6.12637	0.02881	1.38e-09
Adolescence	rs200522680	2	21313384	I	R	0.142	cg15246511	2	21267212	0.36879	6.11522	0.02869	1.48e-09
Adolescence	rs10177492	2	21463922	T	C	0.15	cg24309555	2	21266956	-0.36659	-6.11503	0.00635	1.48e-09
Adolescence	rs597331	2	21262427	A	G	0.481	cg15246511	2	21267212	-0.2569	-6.11317	0.0309	1.5e-09
Adolescence	rs200793994	2	21463326	I	R	0.305	cg16723488	2	21266947	-0.28594	-6.11212	0.01831	1.51e-09
Adolescence	rs34478966	2	21463327	I	R	0.305	cg16723488	2	21266947	-0.28594	-6.11212	0.01831	1.51e-09
Adolescence	rs56143640	2	21476301	G	A	0.312	cg15246511	2	21267212	0.27059	6.1115	0.03036	1.51e-09
Adolescence	rs312968	2	21368451	A	G	0.373	cg07636176	2	21267175	-0.26172	-6.10665	0.02844	1.56e-09
Adolescence	rs645456	2	21317485	T	C	0.372	cg25123895	2	21267113	-0.26981	-6.10215	0.01306	1.6e-09
Adolescence	rs693	2	21232195	G	A	0.488	cg03350299	2	21266960	-0.26553	-6.0893	0.00557	1.73e-09
Adolescence	rs1041968	2	21232804	G	A	0.488	cg03350299	2	21266960	-0.26553	-6.0893	0.00557	1.73e-09
Adolescence	rs60403635	2	21272778	C	T	0.038	cg24309555	2	21266956	-0.67547	-6.08559	0.01763	1.77e-09
Adolescence	rs10205292	2	21426171	T	A	0.227	cg16723488	2	21266947	-0.308	-6.08387	0.0193	1.79e-09
Adolescence	rs4305231	2	21111034	T	C	0.356	cg00673290	2	21266727	-0.27691	-6.08205	0.02738	1.8e-09
Adolescence	rs7421442	2	21411649	A	G	0.335	cg16306978	2	21266953	-0.27738	-6.08202	0.01868	1.81e-09
Adolescence	rs35239705	2	21451687	A	G	0.174	cg00673290	2	21266727	-0.35053	-6.08019	0.01838	1.82e-09
Adolescence	rs7571647	2	21476634	A	G	0.102	cg03350299	2	21266960	-0.42415	-6.07968	0.00951	1.83e-09
Adolescence	rs67175476	2	21319809	D	R	0.371	cg25123895	2	21267113	-0.26897	-6.07378	0.01265	1.9e-09
Adolescence	rs581998	2	21320481	A	G	0.371	cg25123895	2	21267113	-0.26897	-6.07378	0.01265	1.9e-09
Adolescence	rs312942	2	21321866	T	C	0.371	cg25123895	2	21267113	-0.26897	-6.07378	0.01265	1.9e-09
Adolescence	rs312045	2	21463986	C	T	0.294	cg16723488	2	21266947	-0.2853	-6.07291	0.01884	1.91e-09
Adolescence	rs7421442	2	21411649	A	G	0.335	cg03350299	2	21266960	-0.2728	-6.07057	0.00521	1.93e-09
Adolescence	rs200522680	2	21313384	I	R	0.142	cg25071744	2	21266995	0.36736	6.07008	0.01588	1.94e-09
Adolescence	rs144545816	2	21413077	A	G	0.287	cg00673290	2	21266727	0.29031	6.05937	0.02074	2.07e-09
Adolescence	rs200657767	2	21414642	I	R	0.287	cg00673290	2	21266727	0.29031	6.05937	0.02074	2.07e-09
Adolescence	rs312053	2	21428049	C	A	0.229	cg16723488	2	21266947	-0.30652	-6.05568	0.01932	2.11e-09
Adolescence	rs11731423	4	138782217	A	G	0.21	cg15246511	2	21267212	-0.2816	-5.48399	0.01161	5.51e-08
Adolescence	rs12511738	4	138801711	G	A	0.21	cg15246511	2	21267212	-0.2816	-5.48399	0.01161	5.51e-08
Adolescence	rs12618122	2	21417978	G	C	0.282	cg00673290	2	21266727	-0.28881	-6.04986	0.03426	2.19e-09
Adolescence	rs534100	2	21321158	G	A	0.37	cg25123895	2	21267113	-0.26756	-6.04416	0.01247	2.26e-09
Adolescence	rs4305231	2	21111034	T	C	0.356	cg25071744	2	21266995	-0.26336	-6.03982	0.0185	2.32e-09
Adolescence	rs149412333	2	21404245	D	R	0.228	cg16723488	2	21266947	-0.30765	-6.03579	0.01932	2.38e-09
Adolescence	rs679899	2	21250914	A	G	0.48	cg15246511	2	21267212	-0.25333	-6.03155	0.03076	2.44e-09
Adolescence	rs67144154	2	21448511	G	A	0.116	cg00673290	2	21266727	-0.40723	-6.02591	0.03379	2.52e-09
Adolescence	rs76622701	2	21239884	T	A	0.391	cg24309555	2	21266956	0.26541	6.02472	0.00437	2.54e-09
Adolescence	rs952275	2	21221399	T	G	0.488	cg03350299	2	21266960	-0.26256	-6.0182	0.00557	2.64e-09
Adolescence	rs9808284	2	21476247	A	C	0.13	cg03350299	2	21266960	-0.38589	-6.01171	0.00961	2.74e-09
Adolescence	rs76622701	2	21239884	T	A	0.391	cg25071744	2	21266995	0.25691	6.01011	0.01162	2.77e-09
Adolescence	rs66528440	2	21414550	D	R	0.33	cg16306978	2	21266953	-0.27073	-6.00631	0.02507	2.83e-09
Adolescence	rs312033	2	21470596	A	G	0.307	cg00673290	2	21266727	-0.2805	-6.00323	0.0252	2.88e-09
Adolescence	rs1800480	2	21266932	C	G	0.009	cg07636176	2	21267175	-1.37651	-5.9985	0	2.96e-09
Adolescence	rs10234108	7	9400188	T	C	0.13	cg00673290	2	21266727	-0.36256	-5.49178	0.05028	5.28e-08
Adolescence	rs7777056	7	9411583	A	C	0.13	cg00673290	2	21266727	-0.36256	-5.49178	0.05028	5.28e-08
Adolescence	rs58298631	2	21477012	G	T	0.378	cg24309555	2	21266956	0.26375	5.99391	0.00509	3.05e-09
Adolescence	rs693	2	21232195	G	A	0.488	cg16723488	2	21266947	-0.26479	-5.98347	0.02114	3.24e-09
Adolescence	rs1041968	2	21232804	G	A	0.488	cg16723488	2	21266947	-0.26479	-5.98347	0.02114	3.24e-09
Adolescence	rs111826230	2	21378453	G	A	0.089	cg25071744	2	21266995	0.43045	5.95394	0.01934	3.85e-09
Adolescence	rs62437784	7	9406955	G	A	0.13	cg00673290	2	21266727	-0.35821	-5.46154	0.04897	6.23e-08
Adolescence	rs4075673	2	21150787	T	C	0.463	cg16306978	2	21266953	0.25541	5.94667	0.02012	4.02e-09
Adolescence	rs4635554	2	21389659	G	T	0.332	cg15246511	2	21267212	0.26142	5.94077	0.02803	4.16e-09
Adolescence	rs312028	2	21460827	T	C	0.24	cg25071744	2	21266995	0.28376	5.92108	0.02019	4.67e-09
Adolescence	rs312949	2	21334283	G	C	0.376	cg25123895	2	21267113	-0.2603	-5.91095	0.01258	4.95e-09
Adolescence	rs312955	2	21341893	A	G	0.376	cg25123895	2	21267113	-0.2603	-5.91095	0.01258	4.95e-09
Adolescence	rs12536862	7	9427161	G	C	0.129	cg00673290	2	21266727	-0.35755	-5.40583	0.05024	8.42e-08
Adolescence	rs428696	2	21448607	T	C	0.161	cg00673290	2	21266727	-0.35434	-5.89426	0.03102	5.46e-09
Adolescence	rs200793994	2	21463326	I	R	0.305	cg00673290	2	21266727	-0.27645	-5.88619	0.02497	5.72e-09
Adolescence	rs34478966	2	21463327	I	R	0.305	cg00673290	2	21266727	-0.27645	-5.88619	0.02497	5.72e-09
Adolescence	rs403880	2	21449408	T	C	0.161	cg00673290	2	21266727	-0.35224	-5.88561	0.03406	5.74e-09
Adolescence	rs432483	2	21450349	G	C	0.161	cg00673290	2	21266727	-0.35224	-5.88561	0.03406	5.74e-09
Adolescence	rs431493	2	21450824	G	C	0.161	cg00673290	2	21266727	-0.35224	-5.88561	0.03406	5.74e-09
Adolescence	rs148187585	2	21322856	I	R	0.372	cg25123895	2	21267113	-0.26104	-5.88002	0.01265	5.93e-09
Adolescence	rs312946	2	21328999	C	T	0.372	cg25123895	2	21267113	-0.26104	-5.88002	0.01265	5.93e-09
Adolescence	rs312947	2	21330769	C	T	0.372	cg25123895	2	21267113	-0.26104	-5.88002	0.01265	5.93e-09
Adolescence	rs312948	2	21330973	G	A	0.372	cg25123895	2	21267113	-0.26104	-5.88002	0.01265	5.93e-09
Adolescence	rs34059915	2	21331489	D	R	0.372	cg25123895	2	21267113	-0.26104	-5.88002	0.01265	5.93e-09
Adolescence	rs312950	2	21336222	A	T	0.372	cg25123895	2	21267113	-0.26104	-5.88002	0.01265	5.93e-09
Adolescence	rs312954	2	21340303	A	G	0.372	cg25123895	2	21267113	-0.26104	-5.88002	0.01265	5.93e-09
Adolescence	rs312956	2	21342092	C	T	0.372	cg25123895	2	21267113	-0.26104	-5.88002	0.01265	5.93e-09
Adolescence	rs312957	2	21342312	G	A	0.372	cg25123895	2	21267113	-0.26104	-5.88002	0.01265	5.93e-09
Adolescence	rs312958	2	21342924	T	C	0.372	cg25123895	2	21267113	-0.26104	-5.88002	0.01265	5.93e-09
Adolescence	rs312959	2	21346577	C	G	0.372	cg25123895	2	21267113	-0.26104	-5.88002	0.01265	5.93e-09
Adolescence	rs34326968	2	21348147	D	R	0.372	cg25123895	2	21267113	-0.26104	-5.88002	0.01265	5.93e-09
Adolescence	rs312961	2	21349199	C	T	0.372	cg25123895	2	21267113	-0.26104	-5.88002	0.01265	5.93e-09
Adolescence	rs312962	2	21349822	G	T	0.372	cg25123895	2	21267113	-0.26104	-5.88002	0.01265	5.93e-09
Adolescence	rs312963	2	21351281	A	G	0.372	cg25123895	2	21267113	-0.26104	-5.88002	0.01265	5.93e-09
Adolescence	rs367162	2	21444779	C	T	0.161	cg00673290	2	21266727	-0.3516	-5.87953	0.03405	5.95e-09
Adolescence	rs380240	2	21446653	T	C	0.161	cg00673290	2	21266727	-0.3516	-5.87953	0.03405	5.95e-09
Adolescence	rs312052	2	21428185	G	A	0.229	cg16723488	2	21266947	-0.30652	-6.05568	0.01932	2.11e-09
Adolescence	rs17049953	4	138820616	G	A	0.202	cg15246511	2	21267212	-0.27965	-5.37855	0.01168	9.76e-08
Adolescence	rs4257699	4	138564590	T	C	0.113	cg15246511	2	21267212	-0.35678	-5.37417	0.01129	9.99e-08
Adolescence	rs952275	2	21221399	T	G	0.488	cg16723488	2	21266947	-0.26023	-5.8761	0.02114	6.07e-09
Adolescence	rs111596512	2	21414873	T	C	0.256	cg15246511	2	21267212	0.28007	5.87529	0.0432	6.09e-09
Adolescence	rs4075673	2	21150787	T	C	0.463	cg25071744	2	21266995	0.24204	5.87419	0.01383	6.13e-09
Adolescence	rs58298631	2	21477012	G	T	0.378	cg16306978	2	21266953	0.26173	5.87332	0.02542	6.16e-09
Adolescence	rs111826230	2	21378453	G	A	0.089	cg15246511	2	21267212	0.42315	5.86838	0.03403	6.34e-09
Adolescence	rs638988	2	21435271	G	C	0.159	cg00673290	2	21266727	-0.35484	-5.86446	0.03451	6.49e-09
Adolescence	rs139106085	2	21435700	A	C	0.159	cg00673290	2	21266727	-0.35484	-5.86446	0.03451	6.49e-09
Adolescence	rs441169	2	21437028	G	T	0.159	cg00673290	2	21266727	-0.35484	-5.86446	0.03451	6.49e-09
Adolescence	rs312051	2	21429055	C	G	0.161	cg00673290	2	21266727	-0.35255	-5.86316	0.03427	6.54e-09
Adolescence	rs365946	2	21439329	T	G	0.16	cg00673290	2	21266727	-0.35255	-5.86316	0.03427	6.54e-09
Adolescence	rs58298631	2	21477012	G	T	0.378	cg25123895	2	21267113	0.25911	5.86283	0.01256	6.55e-09
Adolescence	rs34641795	2	21332678	I	R	0.372	cg25123895	2	21267113	-0.25973	-5.86107	0.01241	6.62e-09
Adolescence	rs453862	2	21450714	G	A	0.161	cg00673290	2	21266727	-0.3498	-5.84824	0.03407	7.13e-09
Adolescence	rs7567653	2	21276962	A	G	0.04	cg03350299	2	21266960	-0.63885	-5.84128	0.01909	7.42e-09
Adolescence	rs72902584	2	21278070	C	T	0.04	cg03350299	2	21266960	-0.63885	-5.84128	0.01909	7.42e-09
Adolescence	rs72902590	2	21289068	A	G	0.04	cg03350299	2	21266960	-0.63885	-5.84128	0.01909	7.42e-09
Adolescence	rs57667647	2	21292394	A	G	0.04	cg03350299	2	21266960	-0.63885	-5.84128	0.01909	7.42e-09
Adolescence	rs79428416	2	21293135	T	C	0.04	cg03350299	2	21266960	-0.63885	-5.84128	0.01909	7.42e-09
Adolescence	rs312951	2	21337403	A	C	0.364	cg25123895	2	21267113	-0.26002	-5.83869	0.01224	7.53e-09
Adolescence	rs312952	2	21337857	C	G	0.364	cg25123895	2	21267113	-0.26002	-5.83869	0.01224	7.53e-09
Adolescence	rs144545816	2	21413077	A	G	0.287	cg25123895	2	21267113	0.27706	5.83125	0.01636	7.86e-09
Adolescence	rs200657767	2	21414642	I	R	0.287	cg25123895	2	21267113	0.27706	5.83125	0.01636	7.86e-09
Adolescence	rs78158108	2	21296537	C	G	0.086	cg15246511	2	21267212	0.42439	5.82921	0.03403	7.95e-09
Adolescence	rs312967	2	21367516	G	A	0.373	cg25123895	2	21267113	-0.25791	-5.82661	0.01224	8.07e-09
Adolescence	rs312969	2	21369568	C	T	0.373	cg25123895	2	21267113	-0.25791	-5.82661	0.01224	8.07e-09
Adolescence	rs312971	2	21371550	C	T	0.373	cg25123895	2	21267113	-0.25791	-5.82661	0.01224	8.07e-09
Adolescence	rs312972	2	21372590	C	T	0.373	cg25123895	2	21267113	-0.25791	-5.82661	0.01224	8.07e-09
Adolescence	rs312973	2	21372677	A	G	0.373	cg25123895	2	21267113	-0.25791	-5.82661	0.01224	8.07e-09
Adolescence	rs312975	2	21374535	A	G	0.373	cg25123895	2	21267113	-0.25791	-5.82661	0.01224	8.07e-09
Adolescence	rs312977	2	21376312	T	G	0.373	cg25123895	2	21267113	-0.25791	-5.82661	0.01224	8.07e-09
Adolescence	rs312978	2	21376584	G	A	0.373	cg25123895	2	21267113	-0.25791	-5.82661	0.01224	8.07e-09
Adolescence	rs312964	2	21355430	G	T	0.372	cg25123895	2	21267113	-0.25876	-5.82298	0.01247	8.24e-09
Adolescence	rs312045	2	21463986	C	T	0.294	cg25071744	2	21266995	-0.29785	-6.63347	0.02105	5.89e-11
Adolescence	rs312045	2	21463986	C	T	0.294	cg24309555	2	21266956	-0.27081	-5.81801	0.00647	8.48e-09
Adolescence	rs12720820	2	21239661	C	T	0.075	cg25071744	2	21266995	-0.4618	-5.8152	0.02612	8.62e-09
Adolescence	rs34348441	2	21457324	G	A	0.081	cg25071744	2	21266995	-0.44815	-5.81245	0.03572	8.76e-09
Adolescence	rs111826230	2	21378453	G	A	0.089	cg24309555	2	21266956	0.43252	5.79853	0.00892	9.49e-09
Adolescence	rs541041	2	21294975	G	A	0.167	cg25123895	2	21267113	-0.3313	-5.79182	0.00569	9.86e-09
Adolescence	rs13392272	2	21217490	T	C	0.494	cg25071744	2	21266995	0.24501	5.79091	0.01522	9.91e-09
Adolescence	rs312966	2	21360583	G	A	0.377	cg25123895	2	21267113	-0.25465	-5.78523	0.01199	1.02e-08
Adolescence	rs76622701	2	21239884	T	A	0.391	cg03350299	2	21266960	0.25421	5.77832	0.00514	1.06e-08
Adolescence	rs312968	2	21368451	A	G	0.373	cg25123895	2	21267113	-0.25628	-5.77653	0.012	1.08e-08
Adolescence	rs312033	2	21470596	A	G	0.307	cg24309555	2	21266956	-0.26658	-5.77307	0.00651	1.1e-08
Adolescence	rs597331	2	21262427	A	G	0.481	cg16306978	2	21266953	-0.25416	-5.76677	0.02202	1.14e-08
Adolescence	rs79697494	2	21106599	G	C	0.362	cg24309555	2	21266956	-0.25703	-5.75928	0.00573	1.19e-08
Adolescence	rs147826086	2	21108159	G	A	0.362	cg24309555	2	21266956	-0.25703	-5.75928	0.00573	1.19e-08
Adolescence	rs9808284	2	21476247	A	C	0.13	cg24309555	2	21266956	-0.37126	-5.75634	0.00715	1.21e-08
Adolescence	rs78158108	2	21296537	C	G	0.086	cg25071744	2	21266995	0.42046	5.75379	0.01934	1.22e-08
Adolescence	rs181129338	2	21432768	G	A	0.252	cg24309555	2	21266956	0.29183	5.74936	0.007	1.26e-08
Adolescence	rs12710745	2	21112689	G	A	0.37	cg25071744	2	21266995	-0.24759	-5.74638	0.01805	1.28e-08
Adolescence	rs12710745	2	21112689	G	A	0.37	cg16723488	2	21266947	-0.25791	-5.74439	0.02156	1.29e-08
Adolescence	rs72902576	2	21275480	G	T	0.039	cg03350299	2	21266960	-0.63253	-5.74135	0.01909	1.31e-08
Adolescence	rs72902579	2	21276008	C	T	0.039	cg03350299	2	21266960	-0.63253	-5.74135	0.01909	1.31e-08
Adolescence	rs515135	2	21286057	T	C	0.166	cg25123895	2	21267113	-0.32855	-5.7376	0.00569	1.34e-08
Adolescence	rs563290	2	21288226	G	A	0.166	cg25123895	2	21267113	-0.32855	-5.7376	0.00569	1.34e-08
Adolescence	rs562338	2	21288321	A	G	0.166	cg25123895	2	21267113	-0.32855	-5.7376	0.00569	1.34e-08
Adolescence	rs581411	2	21289432	G	A	0.166	cg25123895	2	21267113	-0.32855	-5.7376	0.00569	1.34e-08
Adolescence	rs580889	2	21290067	C	T	0.166	cg25123895	2	21267113	-0.32855	-5.7376	0.00569	1.34e-08
Adolescence	rs548145	2	21291312	T	C	0.166	cg25123895	2	21267113	-0.32855	-5.7376	0.00569	1.34e-08
Adolescence	rs668948	2	21291529	G	A	0.166	cg25123895	2	21267113	-0.32855	-5.7376	0.00569	1.34e-08
Adolescence	rs201027918	2	21293334	I	R	0.166	cg25123895	2	21267113	-0.32855	-5.7376	0.00569	1.34e-08
Adolescence	rs66528440	2	21414550	D	R	0.33	cg03350299	2	21266960	-0.25501	-5.73163	0.00597	1.39e-08
Adolescence	rs60403635	2	21272778	C	T	0.038	cg03350299	2	21266960	-0.63506	-5.72479	0.01909	1.44e-08
Adolescence	rs520354	2	21259612	G	A	0.482	cg16306978	2	21266953	-0.2523	-5.72442	0.02158	1.45e-08
Adolescence	rs181129338	2	21432768	G	A	0.252	cg16723488	2	21266947	0.29364	5.72085	0.03184	1.48e-08
Adolescence	rs138023688	2	21379814	D	R	0.372	cg25123895	2	21267113	-0.25434	-5.71946	0.01224	1.49e-08
Adolescence	rs3791980	2	21245329	G	T	0.297	cg07636176	2	21267175	-0.2623	-5.71818	0.03652	1.5e-08
Adolescence	rs597331	2	21262427	A	G	0.481	cg24309555	2	21266956	-0.24907	-5.71679	0.00384	1.51e-08
Adolescence	rs679899	2	21250914	A	G	0.48	cg16306978	2	21266953	-0.25154	-5.71163	0.02174	1.56e-08
Adolescence	rs11096689	2	21140540	C	T	0.309	cg25071744	2	21266995	0.25276	5.6965	0.01239	1.69e-08
Adolescence	rs3791981	2	21245367	G	A	0.079	cg25071744	2	21266995	-0.44338	-5.69624	0.02606	1.7e-08
Adolescence	rs520354	2	21259612	G	A	0.482	cg24309555	2	21266956	-0.248	-5.6926	0.00386	1.73e-08
Adolescence	rs4665179	2	21321724	C	T	0.343	cg25123895	2	21267113	0.50892	11.8089	0.03099	7.2e-30
Adolescence	rs1848922	2	21471603	T	C	0.192	cg03350299	2	21266960	-0.30397	-5.68237	0.00838	1.83e-08
Adolescence	rs10166144	2	21453733	G	A	0.123	cg24309555	2	21266956	-0.36634	-5.67836	0.00624	1.88e-08
Adolescence	rs140917614	2	21434580	G	A	0.206	cg03350299	2	21266960	-0.29927	-5.67474	0.00497	1.92e-08
Adolescence	rs6548010	2	21277922	G	A	0.353	cg25123895	2	21267113	0.53862	12.8218	0.03634	1.75e-34
Adolescence	rs62122514	2	21285711	A	C	0.353	cg25123895	2	21267113	0.53773	12.7965	0.03622	2.3e-34
Adolescence	rs11693545	2	21292377	A	C	0.353	cg25123895	2	21267113	0.53773	12.7965	0.03622	2.3e-34
Adolescence	rs4665492	2	21294039	C	A	0.353	cg25123895	2	21267113	0.53773	12.7965	0.03622	2.3e-34
Adolescence	rs12714102	2	21246306	C	G	0.08	cg25071744	2	21266995	-0.43531	-5.66979	0.02384	1.97e-08
Adolescence	rs934198	2	21278773	T	G	0.353	cg25123895	2	21267113	0.53766	12.7632	0.03628	3.29e-34
Adolescence	rs6726115	2	21281097	G	A	0.353	cg25123895	2	21267113	0.53766	12.7632	0.03628	3.29e-34
Adolescence	rs1367115	2	21282015	T	C	0.353	cg25123895	2	21267113	0.53766	12.7632	0.03628	3.29e-34
Adolescence	rs7590135	2	21282902	A	G	0.353	cg25123895	2	21267113	0.53766	12.7632	0.03628	3.29e-34
Adolescence	rs4075673	2	21150787	T	C	0.463	cg25123895	2	21267113	0.24182	5.66686	0.01459	2e-08
Adolescence	rs10221742	2	21419650	A	G	0.206	cg07636176	2	21267175	-0.2864	-5.66581	0.05008	2.01e-08
Adolescence	rs62122515	2	21295227	A	G	0.357	cg25123895	2	21267113	0.53437	12.719	0.03618	5.29e-34
Adolescence	rs62122516	2	21295439	T	A	0.357	cg25123895	2	21267113	0.53437	12.719	0.03618	5.29e-34
Adolescence	rs1367113	2	21295832	A	G	0.357	cg25123895	2	21267113	0.53437	12.719	0.03618	5.29e-34
Adolescence	rs12720820	2	21239661	C	T	0.075	cg16306978	2	21266953	-0.46921	-5.65958	0.04472	2.09e-08
Adolescence	rs7421442	2	21411649	A	G	0.335	cg16723488	2	21266947	-0.25843	-5.65492	0.01587	2.14e-08
Adolescence	rs12477249	2	21400661	A	G	0.334	cg15246511	2	21267212	0.24845	5.65472	0.02803	2.14e-08
Adolescence	rs6548010	2	21277922	G	A	0.353	cg15246511	2	21267212	0.51358	12.6584	0.04884	1.01e-33
Adolescence	rs7575840	2	21273490	T	G	0.353	cg25123895	2	21267113	0.53381	12.6541	0.03711	1.06e-33
Adolescence	rs11126598	2	21240364	A	G	0.296	cg07636176	2	21267175	-0.25993	-5.65014	0.03542	2.2e-08
Adolescence	rs200793994	2	21463326	I	R	0.305	cg24309555	2	21266956	-0.26226	-5.65013	0.00606	2.2e-08
Adolescence	rs34478966	2	21463327	I	R	0.305	cg24309555	2	21266956	-0.26226	-5.65013	0.00606	2.2e-08
Adolescence	rs6548011	2	21277932	T	C	0.353	cg15246511	2	21267212	0.51357	12.627	0.04922	1.41e-33
Adolescence	rs934198	2	21278773	T	G	0.353	cg15246511	2	21267212	0.51357	12.627	0.04922	1.41e-33
Adolescence	rs6726115	2	21281097	G	A	0.353	cg15246511	2	21267212	0.51357	12.627	0.04922	1.41e-33
Adolescence	rs1367115	2	21282015	T	C	0.353	cg15246511	2	21267212	0.51357	12.627	0.04922	1.41e-33
Adolescence	rs7590135	2	21282902	A	G	0.353	cg15246511	2	21267212	0.51357	12.627	0.04922	1.41e-33
Adolescence	rs13392272	2	21217490	T	C	0.494	cg16723488	2	21266947	0.24886	5.63906	0.01996	2.34e-08
Adolescence	rs34348441	2	21457324	G	A	0.081	cg16306978	2	21266953	-0.4539	-5.63827	0.04524	2.35e-08
Adolescence	rs679899	2	21250914	A	G	0.48	cg24309555	2	21266956	-0.24486	-5.62281	0.00377	2.56e-08
Adolescence	rs7566030	2	21282578	G	C	0.353	cg15246511	2	21267212	0.51146	12.5962	0.04884	1.96e-33
Adolescence	rs181129338	2	21432768	G	A	0.252	cg00673290	2	21266727	0.28926	5.61846	0.02627	2.63e-08
Adolescence	rs62122514	2	21285711	A	C	0.353	cg15246511	2	21267212	0.51072	12.5745	0.04884	2.47e-33
Adolescence	rs11693545	2	21292377	A	C	0.353	cg15246511	2	21267212	0.51072	12.5745	0.04884	2.47e-33
Adolescence	rs4665492	2	21294039	C	A	0.353	cg15246511	2	21267212	0.51072	12.5745	0.04884	2.47e-33
Adolescence	rs10166144	2	21453733	G	A	0.123	cg00673290	2	21266727	-0.36716	-5.61328	0.04051	2.7e-08
Adolescence	rs78158108	2	21296537	C	G	0.086	cg24309555	2	21266956	0.42305	5.61184	0.00888	2.72e-08
Adolescence	rs312028	2	21460827	T	C	0.24	cg16723488	2	21266947	0.28046	5.60446	0.02565	2.84e-08
Adolescence	rs4503953	2	21105335	A	G	0.361	cg24309555	2	21266956	-0.24907	-5.59561	0.00571	2.98e-08
Adolescence	rs550619	2	21260601	G	A	0.075	cg25071744	2	21266995	-0.44218	-5.5912	0.02384	3.06e-08
Adolescence	rs579826	2	21261507	T	C	0.075	cg25071744	2	21266995	-0.44218	-5.5912	0.02384	3.06e-08
Adolescence	rs541041	2	21294975	G	A	0.167	cg25071744	2	21266995	-0.64592	-12.4718	0.03188	7.36e-33
Adolescence	rs515135	2	21286057	T	C	0.166	cg25071744	2	21266995	-0.64582	-12.4592	0.03202	8.4e-33
Adolescence	rs563290	2	21288226	G	A	0.166	cg25071744	2	21266995	-0.64582	-12.4592	0.03202	8.4e-33
Adolescence	rs562338	2	21288321	A	G	0.166	cg25071744	2	21266995	-0.64582	-12.4592	0.03202	8.4e-33
Adolescence	rs581411	2	21289432	G	A	0.166	cg25071744	2	21266995	-0.64582	-12.4592	0.03202	8.4e-33
Adolescence	rs580889	2	21290067	C	T	0.166	cg25071744	2	21266995	-0.64582	-12.4592	0.03202	8.4e-33
Adolescence	rs548145	2	21291312	T	C	0.166	cg25071744	2	21266995	-0.64582	-12.4592	0.03202	8.4e-33
Adolescence	rs668948	2	21291529	G	A	0.166	cg25071744	2	21266995	-0.64582	-12.4592	0.03202	8.4e-33
Adolescence	rs201027918	2	21293334	I	R	0.166	cg25071744	2	21266995	-0.64582	-12.4592	0.03202	8.4e-33
Adolescence	rs181403065	2	21435831	T	A	0.152	cg00673290	2	21266727	-0.34568	-5.58917	0.03425	3.09e-08
Adolescence	rs1848922	2	21471603	T	C	0.192	cg16306978	2	21266953	-0.30342	-5.58512	0.03376	3.16e-08
Adolescence	rs11680233	2	21240031	A	C	0.295	cg07636176	2	21267175	-0.25675	-5.58103	0.03507	3.23e-08
Adolescence	rs4075673	2	21150787	T	C	0.463	cg15246511	2	21267212	0.22962	5.57999	0.03044	3.25e-08
Adolescence	rs62122515	2	21295227	A	G	0.357	cg15246511	2	21267212	0.50298	12.3661	0.04865	2.24e-32
Adolescence	rs62122516	2	21295439	T	A	0.357	cg15246511	2	21267212	0.50298	12.3661	0.04865	2.24e-32
Adolescence	rs1367113	2	21295832	A	G	0.357	cg15246511	2	21267212	0.50298	12.3661	0.04865	2.24e-32
Adolescence	rs71435594	2	21309335	T	C	0.076	cg16723488	2	21266947	-0.45223	-5.57103	0.02524	3.42e-08
Adolescence	rs515135	2	21286057	T	C	0.166	cg16306978	2	21266953	-0.66784	-12.3344	0.0517	3.13e-32
Adolescence	rs563290	2	21288226	G	A	0.166	cg16306978	2	21266953	-0.66784	-12.3344	0.0517	3.13e-32
Adolescence	rs562338	2	21288321	A	G	0.166	cg16306978	2	21266953	-0.66784	-12.3344	0.0517	3.13e-32
Adolescence	rs581411	2	21289432	G	A	0.166	cg16306978	2	21266953	-0.66784	-12.3344	0.0517	3.13e-32
Adolescence	rs580889	2	21290067	C	T	0.166	cg16306978	2	21266953	-0.66784	-12.3344	0.0517	3.13e-32
Adolescence	rs548145	2	21291312	T	C	0.166	cg16306978	2	21266953	-0.66784	-12.3344	0.0517	3.13e-32
Adolescence	rs668948	2	21291529	G	A	0.166	cg16306978	2	21266953	-0.66784	-12.3344	0.0517	3.13e-32
Adolescence	rs201027918	2	21293334	I	R	0.166	cg16306978	2	21266953	-0.66784	-12.3344	0.0517	3.13e-32
Adolescence	rs6548010	2	21277922	G	A	0.353	cg25071744	2	21266995	0.5034	12.3142	0.0311	3.87e-32
Adolescence	rs541041	2	21294975	G	A	0.167	cg16306978	2	21266953	-0.66603	-12.3051	0.05145	4.26e-32
Adolescence	rs62122515	2	21295227	A	G	0.357	cg25071744	2	21266995	0.50225	12.2981	0.02951	4.58e-32
Adolescence	rs62122516	2	21295439	T	A	0.357	cg25071744	2	21266995	0.50225	12.2981	0.02951	4.58e-32
Adolescence	rs1367113	2	21295832	A	G	0.357	cg25071744	2	21266995	0.50225	12.2981	0.02951	4.58e-32
Adolescence	rs6548011	2	21277932	T	C	0.353	cg25071744	2	21266995	0.50318	12.2781	0.03095	5.65e-32
Adolescence	rs934198	2	21278773	T	G	0.353	cg25071744	2	21266995	0.50318	12.2781	0.03095	5.65e-32
Adolescence	rs6726115	2	21281097	G	A	0.353	cg25071744	2	21266995	0.50318	12.2781	0.03095	5.65e-32
Adolescence	rs1367115	2	21282015	T	C	0.353	cg25071744	2	21266995	0.50318	12.2781	0.03095	5.65e-32
Adolescence	rs7590135	2	21282902	A	G	0.353	cg25071744	2	21266995	0.50318	12.2781	0.03095	5.65e-32
Adolescence	rs62122514	2	21285711	A	C	0.353	cg25071744	2	21266995	0.50176	12.2668	0.02997	6.36e-32
Adolescence	rs11693545	2	21292377	A	C	0.353	cg25071744	2	21266995	0.50176	12.2668	0.02997	6.36e-32
Adolescence	rs4665492	2	21294039	C	A	0.353	cg25071744	2	21266995	0.50176	12.2668	0.02997	6.36e-32
Adolescence	rs7566030	2	21282578	G	C	0.353	cg25071744	2	21266995	0.50112	12.2483	0.02997	7.71e-32
Adolescence	rs6548010	2	21277922	G	A	0.353	cg07636176	2	21267175	0.50093	12.2235	0.06728	1e-31
Adolescence	rs7575840	2	21273490	T	G	0.353	cg15246511	2	21267212	0.4996	12.2211	0.04798	1.02e-31
Adolescence	rs6548011	2	21277932	T	C	0.353	cg07636176	2	21267175	0.50185	12.2203	0.06776	1.03e-31
Adolescence	rs934198	2	21278773	T	G	0.353	cg07636176	2	21267175	0.50185	12.2203	0.06776	1.03e-31
Adolescence	rs6726115	2	21281097	G	A	0.353	cg07636176	2	21267175	0.50185	12.2203	0.06776	1.03e-31
Adolescence	rs1367115	2	21282015	T	C	0.353	cg07636176	2	21267175	0.50185	12.2203	0.06776	1.03e-31
Adolescence	rs7590135	2	21282902	A	G	0.353	cg07636176	2	21267175	0.50185	12.2203	0.06776	1.03e-31
Adolescence	rs12710745	2	21112689	G	A	0.37	cg00673290	2	21266727	-0.25023	-5.55307	0.02293	3.77e-08
Adolescence	rs62122514	2	21285711	A	C	0.353	cg07636176	2	21267175	0.5007	12.2166	0.06728	1.07e-31
Adolescence	rs11693545	2	21292377	A	C	0.353	cg07636176	2	21267175	0.5007	12.2166	0.06728	1.07e-31
Adolescence	rs4665492	2	21294039	C	A	0.353	cg07636176	2	21267175	0.5007	12.2166	0.06728	1.07e-31
Adolescence	rs144545816	2	21413077	A	G	0.287	cg07636176	2	21267175	0.25576	5.54937	0.03675	3.85e-08
Adolescence	rs200657767	2	21414642	I	R	0.287	cg07636176	2	21267175	0.25576	5.54937	0.03675	3.85e-08
Adolescence	rs62122515	2	21295227	A	G	0.357	cg07636176	2	21267175	0.49938	12.1957	0.06478	1.34e-31
Adolescence	rs62122516	2	21295439	T	A	0.357	cg07636176	2	21267175	0.49938	12.1957	0.06478	1.34e-31
Adolescence	rs1367113	2	21295832	A	G	0.357	cg07636176	2	21267175	0.49938	12.1957	0.06478	1.34e-31
Adolescence	rs7566030	2	21282578	G	C	0.353	cg07636176	2	21267175	0.49979	12.1907	0.06728	1.41e-31
Adolescence	rs312029	2	21461730	C	G	0.124	cg00673290	2	21266727	-0.36085	-5.53662	0.04049	4.13e-08
Adolescence	rs56212928	2	21272763	D	R	0.352	cg15246511	2	21267212	0.49544	12.1095	0.04793	3.27e-31
Adolescence	rs427021	2	21451458	A	G	0.396	cg15246511	2	21267212	0.23721	5.53316	0.03346	4.21e-08
Adolescence	rs7575840	2	21273490	T	G	0.353	cg25071744	2	21266995	0.49688	12.0971	0.02957	3.72e-31
Adolescence	rs62133264	2	21380902	C	T	0.339	cg25123895	2	21267113	0.50703	11.6973	0.03065	2.23e-29
Adolescence	rs425953	2	21437272	G	A	0.397	cg15246511	2	21267212	0.23749	5.53107	0.03346	4.26e-08
Adolescence	rs377157	2	21437275	T	C	0.397	cg15246511	2	21267212	0.23749	5.53107	0.03346	4.26e-08
Adolescence	rs11693760	2	21296492	G	A	0.335	cg25123895	2	21267113	0.51834	12.0142	0.03519	8.77e-31
Adolescence	rs11693775	2	21296546	G	A	0.335	cg25123895	2	21267113	0.51834	12.0142	0.03519	8.77e-31
Adolescence	rs72782148	2	21298547	A	T	0.335	cg25123895	2	21267113	0.51834	12.0142	0.03519	8.77e-31
Adolescence	rs11673790	2	21299195	T	C	0.335	cg25123895	2	21267113	0.51834	12.0142	0.03519	8.77e-31
Adolescence	rs34348441	2	21457324	G	A	0.081	cg16723488	2	21266947	-0.44438	-5.52055	0.03231	4.51e-08
Adolescence	rs10166647	2	21460176	C	T	0.408	cg25123895	2	21267113	0.23913	5.46816	0.0123	6.01e-08
Adolescence	rs139313954	2	21327042	D	R	0.337	cg15246511	2	21267212	0.49738	11.9622	0.0477	1.5e-30
Adolescence	rs56212928	2	21272763	D	R	0.352	cg25071744	2	21266995	0.49161	11.9548	0.02843	1.62e-30
Adolescence	rs7575840	2	21273490	T	G	0.353	cg07636176	2	21267175	0.4918	11.9332	0.06865	2.02e-30
Adolescence	rs56350433	2	21298384	A	T	0.339	cg25123895	2	21267113	0.51424	11.9293	0.03388	2.1e-30
Adolescence	rs62122517	2	21298811	A	G	0.339	cg25123895	2	21267113	0.51424	11.9293	0.03388	2.1e-30
Adolescence	rs147360532	2	21299935	D	R	0.339	cg25123895	2	21267113	0.51424	11.9293	0.03388	2.1e-30
Adolescence	rs1429974	2	21300770	A	C	0.339	cg25123895	2	21267113	0.51424	11.9293	0.03388	2.1e-30
Adolescence	rs6708168	2	21301641	A	T	0.339	cg25123895	2	21267113	0.51424	11.9293	0.03388	2.1e-30
Adolescence	rs2195598	2	21303043	T	C	0.339	cg25123895	2	21267113	0.51424	11.9293	0.03388	2.1e-30
Adolescence	rs78120576	2	21318633	C	T	0.338	cg25123895	2	21267113	0.51374	11.9229	0.03099	2.24e-30
Adolescence	rs2337383	2	21320516	G	A	0.338	cg25123895	2	21267113	0.51374	11.9229	0.03099	2.24e-30
Adolescence	rs17399144	2	21305685	G	A	0.335	cg25123895	2	21267113	0.5137	11.9192	0.03453	2.33e-30
Adolescence	rs4665176	2	21305853	C	T	0.335	cg25123895	2	21267113	0.5137	11.9192	0.03453	2.33e-30
Adolescence	rs6761300	2	21306974	G	A	0.335	cg25123895	2	21267113	0.5137	11.9192	0.03453	2.33e-30
Adolescence	rs11693760	2	21296492	G	A	0.335	cg15246511	2	21267212	0.49567	11.9044	0.04829	2.71e-30
Adolescence	rs11693775	2	21296546	G	A	0.335	cg15246511	2	21267212	0.49567	11.9044	0.04829	2.71e-30
Adolescence	rs72782148	2	21298547	A	T	0.335	cg15246511	2	21267212	0.49567	11.9044	0.04829	2.71e-30
Adolescence	rs11673790	2	21299195	T	C	0.335	cg15246511	2	21267212	0.49567	11.9044	0.04829	2.71e-30
Adolescence	rs4305231	2	21111034	T	C	0.356	cg24309555	2	21266956	-0.24825	-5.50441	0.00572	4.93e-08
Adolescence	rs78120576	2	21318633	C	T	0.338	cg15246511	2	21267212	0.49343	11.8744	0.04829	3.69e-30
Adolescence	rs2337383	2	21320516	G	A	0.338	cg15246511	2	21267212	0.49343	11.8744	0.04829	3.69e-30
Adolescence	rs70939083	2	21467872	D	R	0.124	cg00673290	2	21266727	-0.35918	-5.50235	0.04049	4.99e-08
Adolescence	rs13387827	2	21469152	T	G	0.124	cg00673290	2	21266727	-0.35918	-5.50235	0.04049	4.99e-08
Adolescence	rs13398007	2	21469336	T	C	0.124	cg00673290	2	21266727	-0.35918	-5.50235	0.04049	4.99e-08
Adolescence	rs10170323	2	21469738	T	G	0.124	cg00673290	2	21266727	-0.35918	-5.50235	0.04049	4.99e-08
Adolescence	rs10183198	2	21470987	T	C	0.124	cg00673290	2	21266727	-0.35918	-5.50235	0.04049	4.99e-08
Adolescence	rs312050	2	21429198	G	A	0.397	cg15246511	2	21267212	0.2358	5.50033	0.03328	5.04e-08
Adolescence	rs10560877	2	21444095	D	R	0.395	cg15246511	2	21267212	0.23626	5.50012	0.03351	5.05e-08
Adolescence	rs139313954	2	21327042	D	R	0.337	cg25123895	2	21267113	0.51163	11.8423	0.03065	5.12e-30
Adolescence	rs61539677	2	21305195	G	A	0.339	cg25123895	2	21267113	0.50966	11.8353	0.03345	5.5e-30
Adolescence	rs754523	2	21311691	G	A	0.339	cg25123895	2	21267113	0.50966	11.8353	0.03345	5.5e-30
Adolescence	rs62122520	2	21313430	T	G	0.339	cg25123895	2	21267113	0.50966	11.8353	0.03345	5.5e-30
Adolescence	rs56079819	2	21314851	A	G	0.339	cg25123895	2	21267113	0.50966	11.8353	0.03345	5.5e-30
Adolescence	rs17399144	2	21305685	G	A	0.335	cg15246511	2	21267212	0.4917	11.8234	0.04779	6.21e-30
Adolescence	rs4665176	2	21305853	C	T	0.335	cg15246511	2	21267212	0.4917	11.8234	0.04779	6.21e-30
Adolescence	rs6761300	2	21306974	G	A	0.335	cg15246511	2	21267212	0.4917	11.8234	0.04779	6.21e-30
Adolescence	rs1897083	2	21297051	G	A	0.337	cg25123895	2	21267113	0.51065	11.8158	0.03345	6.7e-30
Adolescence	rs138073775	2	21323862	I	R	0.336	cg25123895	2	21267113	0.51026	11.8123	0.03065	6.95e-30
Adolescence	rs72073594	2	21319986	D	R	0.343	cg25123895	2	21267113	0.50892	11.8089	0.03099	7.2e-30
Adolescence	rs11693870	2	21320250	C	T	0.343	cg25123895	2	21267113	0.50892	11.8089	0.03099	7.2e-30
Adolescence	rs4665178	2	21321721	G	A	0.343	cg25123895	2	21267113	0.50892	11.8089	0.03099	7.2e-30
Adolescence	rs312028	2	21460827	T	C	0.24	cg00673290	2	21266727	0.27572	5.49284	0.02174	5.25e-08
Adolescence	rs13392272	2	21217490	T	C	0.494	cg03350299	2	21266960	0.23921	5.49159	0.00513	5.29e-08
Adolescence	rs17395333	2	21323369	G	A	0.337	cg25123895	2	21267113	0.51028	11.8058	0.03065	7.43e-30
Adolescence	rs56090741	2	21323651	G	T	0.337	cg25123895	2	21267113	0.51028	11.8058	0.03065	7.43e-30
Adolescence	rs56201838	2	21328501	C	A	0.338	cg25123895	2	21267113	0.51078	11.8054	0.03065	7.46e-30
Adolescence	rs56306424	2	21328665	A	G	0.338	cg25123895	2	21267113	0.51078	11.8054	0.03065	7.46e-30
Adolescence	rs2163203	2	21331137	C	T	0.338	cg25123895	2	21267113	0.51078	11.8054	0.03065	7.46e-30
Adolescence	rs2195597	2	21331185	C	T	0.338	cg25123895	2	21267113	0.51078	11.8054	0.03065	7.46e-30
Adolescence	rs111233436	2	21340378	C	A	0.338	cg25123895	2	21267113	0.51078	11.8054	0.03065	7.46e-30
Adolescence	rs7568899	2	21345292	G	A	0.338	cg25123895	2	21267113	0.51078	11.8054	0.03065	7.46e-30
Adolescence	rs62135035	2	21346521	G	A	0.338	cg25123895	2	21267113	0.51078	11.8054	0.03065	7.46e-30
Adolescence	rs17395512	2	21346556	C	T	0.338	cg25123895	2	21267113	0.51078	11.8054	0.03065	7.46e-30
Adolescence	rs62135036	2	21348670	G	A	0.338	cg25123895	2	21267113	0.51078	11.8054	0.03065	7.46e-30
Adolescence	rs72782173	2	21348958	C	T	0.338	cg25123895	2	21267113	0.51078	11.8054	0.03065	7.46e-30
Adolescence	rs2115838	2	21350324	A	G	0.338	cg25123895	2	21267113	0.51078	11.8054	0.03065	7.46e-30
Adolescence	rs56201838	2	21328501	C	A	0.338	cg15246511	2	21267212	0.49229	11.8051	0.0477	7.48e-30
Adolescence	rs56306424	2	21328665	A	G	0.338	cg15246511	2	21267212	0.49229	11.8051	0.0477	7.48e-30
Adolescence	rs2163203	2	21331137	C	T	0.338	cg15246511	2	21267212	0.49229	11.8051	0.0477	7.48e-30
Adolescence	rs2195597	2	21331185	C	T	0.338	cg15246511	2	21267212	0.49229	11.8051	0.0477	7.48e-30
Adolescence	rs111233436	2	21340378	C	A	0.338	cg15246511	2	21267212	0.49229	11.8051	0.0477	7.48e-30
Adolescence	rs7568899	2	21345292	G	A	0.338	cg15246511	2	21267212	0.49229	11.8051	0.0477	7.48e-30
Adolescence	rs62135035	2	21346521	G	A	0.338	cg15246511	2	21267212	0.49229	11.8051	0.0477	7.48e-30
Adolescence	rs17395512	2	21346556	C	T	0.338	cg15246511	2	21267212	0.49229	11.8051	0.0477	7.48e-30
Adolescence	rs62135036	2	21348670	G	A	0.338	cg15246511	2	21267212	0.49229	11.8051	0.0477	7.48e-30
Adolescence	rs72782173	2	21348958	C	T	0.338	cg15246511	2	21267212	0.49229	11.8051	0.0477	7.48e-30
Adolescence	rs2115838	2	21350324	A	G	0.338	cg15246511	2	21267212	0.49229	11.8051	0.0477	7.48e-30
Adolescence	rs62133262	2	21369926	C	T	0.337	cg25123895	2	21267113	0.50967	11.7893	0.03065	8.79e-30
Adolescence	rs11687710	2	21371068	C	T	0.337	cg25123895	2	21267113	0.50967	11.7893	0.03065	8.79e-30
Adolescence	rs142066046	2	21374231	C	G	0.337	cg25123895	2	21267113	0.50967	11.7893	0.03065	8.79e-30
Adolescence	rs17395333	2	21323369	G	A	0.337	cg15246511	2	21267212	0.49054	11.7703	0.0477	1.07e-29
Adolescence	rs56090741	2	21323651	G	T	0.337	cg15246511	2	21267212	0.49054	11.7703	0.0477	1.07e-29
Adolescence	rs56212928	2	21272763	D	R	0.352	cg07636176	2	21267175	0.48556	11.7642	0.06841	1.13e-29
Adolescence	rs312049	2	21475944	C	T	0.406	cg25123895	2	21267113	0.23966	5.48034	0.01233	5.62e-08
Adolescence	rs139313954	2	21327042	D	R	0.337	cg25071744	2	21266995	0.49058	11.7273	0.03006	1.65e-29
Adolescence	rs62133262	2	21369926	C	T	0.337	cg15246511	2	21267212	0.48898	11.7266	0.04756	1.66e-29
Adolescence	rs11687710	2	21371068	C	T	0.337	cg15246511	2	21267212	0.48898	11.7266	0.04756	1.66e-29
Adolescence	rs142066046	2	21374231	C	G	0.337	cg15246511	2	21267212	0.48898	11.7266	0.04756	1.66e-29
Adolescence	rs138073775	2	21323862	I	R	0.336	cg15246511	2	21267212	0.48843	11.7181	0.04756	1.81e-29
Adolescence	rs1848922	2	21471603	T	C	0.192	cg25071744	2	21266995	-0.2845	-5.45715	0.01802	6.38e-08
Adolescence	rs58298631	2	21477012	G	T	0.378	cg03350299	2	21266960	0.2409	5.47218	0.00416	5.88e-08
Adolescence	rs12052779	2	21333932	C	A	0.343	cg25123895	2	21267113	0.50595	11.6916	0.03065	2.37e-29
Adolescence	rs56350433	2	21298384	A	T	0.339	cg15246511	2	21267212	0.48707	11.6893	0.04736	2.42e-29
Adolescence	rs62122517	2	21298811	A	G	0.339	cg15246511	2	21267212	0.48707	11.6893	0.04736	2.42e-29
Adolescence	rs147360532	2	21299935	D	R	0.339	cg15246511	2	21267212	0.48707	11.6893	0.04736	2.42e-29
Adolescence	rs1429974	2	21300770	A	C	0.339	cg15246511	2	21267212	0.48707	11.6893	0.04736	2.42e-29
Adolescence	rs6708168	2	21301641	A	T	0.339	cg15246511	2	21267212	0.48707	11.6893	0.04736	2.42e-29
Adolescence	rs2195598	2	21303043	T	C	0.339	cg15246511	2	21267212	0.48707	11.6893	0.04736	2.42e-29
Adolescence	rs72073594	2	21319986	D	R	0.343	cg25071744	2	21266995	0.48776	11.6882	0.02948	2.45e-29
Adolescence	rs11693870	2	21320250	C	T	0.343	cg25071744	2	21266995	0.48776	11.6882	0.02948	2.45e-29
Adolescence	rs4665178	2	21321721	G	A	0.343	cg25071744	2	21266995	0.48776	11.6882	0.02948	2.45e-29
Adolescence	rs4665179	2	21321724	C	T	0.343	cg25071744	2	21266995	0.48776	11.6882	0.02948	2.45e-29
Adolescence	rs11693760	2	21296492	G	A	0.335	cg07636176	2	21267175	0.49016	11.6877	0.06292	2.46e-29
Adolescence	rs11693775	2	21296546	G	A	0.335	cg07636176	2	21267175	0.49016	11.6877	0.06292	2.46e-29
Adolescence	rs72782148	2	21298547	A	T	0.335	cg07636176	2	21267175	0.49016	11.6877	0.06292	2.46e-29
Adolescence	rs11673790	2	21299195	T	C	0.335	cg07636176	2	21267175	0.49016	11.6877	0.06292	2.46e-29
Adolescence	rs12052779	2	21333932	C	A	0.343	cg25071744	2	21266995	0.48896	11.6848	0.02848	2.54e-29
Adolescence	rs78120576	2	21318633	C	T	0.338	cg25071744	2	21266995	0.48728	11.6584	0.03053	3.31e-29
Adolescence	rs2337383	2	21320516	G	A	0.338	cg25071744	2	21266995	0.48728	11.6584	0.03053	3.31e-29
Adolescence	rs56350433	2	21298384	A	T	0.339	cg07636176	2	21267175	0.48819	11.6583	0.06347	3.32e-29
Adolescence	rs62122517	2	21298811	A	G	0.339	cg07636176	2	21267175	0.48819	11.6583	0.06347	3.32e-29
Adolescence	rs147360532	2	21299935	D	R	0.339	cg07636176	2	21267175	0.48819	11.6583	0.06347	3.32e-29
Adolescence	rs1429974	2	21300770	A	C	0.339	cg07636176	2	21267175	0.48819	11.6583	0.06347	3.32e-29
Adolescence	rs6708168	2	21301641	A	T	0.339	cg07636176	2	21267175	0.48819	11.6583	0.06347	3.32e-29
Adolescence	rs2195598	2	21303043	T	C	0.339	cg07636176	2	21267175	0.48819	11.6583	0.06347	3.32e-29
Adolescence	rs56201838	2	21328501	C	A	0.338	cg25071744	2	21266995	0.48848	11.655	0.03024	3.43e-29
Adolescence	rs56306424	2	21328665	A	G	0.338	cg25071744	2	21266995	0.48848	11.655	0.03024	3.43e-29
Adolescence	rs2163203	2	21331137	C	T	0.338	cg25071744	2	21266995	0.48848	11.655	0.03024	3.43e-29
Adolescence	rs2195597	2	21331185	C	T	0.338	cg25071744	2	21266995	0.48848	11.655	0.03024	3.43e-29
Adolescence	rs111233436	2	21340378	C	A	0.338	cg25071744	2	21266995	0.48848	11.655	0.03024	3.43e-29
Adolescence	rs7568899	2	21345292	G	A	0.338	cg25071744	2	21266995	0.48848	11.655	0.03024	3.43e-29
Adolescence	rs62135035	2	21346521	G	A	0.338	cg25071744	2	21266995	0.48848	11.655	0.03024	3.43e-29
Adolescence	rs17395512	2	21346556	C	T	0.338	cg25071744	2	21266995	0.48848	11.655	0.03024	3.43e-29
Adolescence	rs62135036	2	21348670	G	A	0.338	cg25071744	2	21266995	0.48848	11.655	0.03024	3.43e-29
Adolescence	rs72782173	2	21348958	C	T	0.338	cg25071744	2	21266995	0.48848	11.655	0.03024	3.43e-29
Adolescence	rs2115838	2	21350324	A	G	0.338	cg25071744	2	21266995	0.48848	11.655	0.03024	3.43e-29
Adolescence	rs139313954	2	21327042	D	R	0.337	cg07636176	2	21267175	0.48822	11.6435	0.0649	3.85e-29
Adolescence	rs312028	2	21460827	T	C	0.24	cg24309555	2	21266956	0.27023	5.45431	0.00482	6.48e-08
Adolescence	rs72073594	2	21319986	D	R	0.343	cg15246511	2	21267212	0.48437	11.637	0.04727	4.11e-29
Adolescence	rs11693870	2	21320250	C	T	0.343	cg15246511	2	21267212	0.48437	11.637	0.04727	4.11e-29
Adolescence	rs4665178	2	21321721	G	A	0.343	cg15246511	2	21267212	0.48437	11.637	0.04727	4.11e-29
Adolescence	rs4665179	2	21321724	C	T	0.343	cg15246511	2	21267212	0.48437	11.637	0.04727	4.11e-29
Adolescence	rs1897083	2	21297051	G	A	0.337	cg15246511	2	21267212	0.48564	11.6334	0.04788	4.26e-29
Adolescence	rs62133264	2	21380902	C	T	0.339	cg15246511	2	21267212	0.48624	11.6294	0.0477	4.44e-29
Adolescence	rs1897083	2	21297051	G	A	0.337	cg07636176	2	21267175	0.48726	11.6167	0.06402	5.04e-29
Adolescence	rs61539677	2	21305195	G	A	0.339	cg15246511	2	21267212	0.48318	11.61	0.04684	5.4e-29
Adolescence	rs754523	2	21311691	G	A	0.339	cg15246511	2	21267212	0.48318	11.61	0.04684	5.4e-29
Adolescence	rs62122520	2	21313430	T	G	0.339	cg15246511	2	21267212	0.48318	11.61	0.04684	5.4e-29
Adolescence	rs56079819	2	21314851	A	G	0.339	cg15246511	2	21267212	0.48318	11.61	0.04684	5.4e-29
Adolescence	rs17395333	2	21323369	G	A	0.337	cg25071744	2	21266995	0.48614	11.604	0.03024	5.73e-29
Adolescence	rs56090741	2	21323651	G	T	0.337	cg25071744	2	21266995	0.48614	11.604	0.03024	5.73e-29
Adolescence	rs12386169	2	21431721	C	T	0.398	cg15246511	2	21267212	0.23383	5.44826	0.03324	6.7e-08
Adolescence	rs549973	2	21437915	A	G	0.398	cg15246511	2	21267212	0.23383	5.44826	0.03324	6.7e-08
Adolescence	rs405983	2	21438129	A	G	0.398	cg15246511	2	21267212	0.23383	5.44826	0.03324	6.7e-08
Adolescence	rs435647	2	21438180	G	T	0.398	cg15246511	2	21267212	0.23383	5.44826	0.03324	6.7e-08
Adolescence	rs398532	2	21438480	A	G	0.398	cg15246511	2	21267212	0.23383	5.44826	0.03324	6.7e-08
Adolescence	rs437775	2	21438794	G	A	0.398	cg15246511	2	21267212	0.23383	5.44826	0.03324	6.7e-08
Adolescence	rs436941	2	21438863	C	T	0.398	cg15246511	2	21267212	0.23383	5.44826	0.03324	6.7e-08
Adolescence	rs364381	2	21439753	T	G	0.398	cg15246511	2	21267212	0.23383	5.44826	0.03324	6.7e-08
Adolescence	rs4665176	2	21305853	C	T	0.335	cg07636176	2	21267175	0.48535	11.5842	0.06251	7e-29
Adolescence	rs6761300	2	21306974	G	A	0.335	cg07636176	2	21267175	0.48535	11.5842	0.06251	7e-29
Adolescence	rs452502	2	21442614	G	A	0.398	cg15246511	2	21267212	0.23383	5.44826	0.03324	6.7e-08
Adolescence	rs426353	2	21442635	A	G	0.398	cg15246511	2	21267212	0.23383	5.44826	0.03324	6.7e-08
Adolescence	rs412255	2	21442733	C	T	0.398	cg15246511	2	21267212	0.23383	5.44826	0.03324	6.7e-08
Adolescence	rs3106202	2	21442855	C	A	0.398	cg15246511	2	21267212	0.23383	5.44826	0.03324	6.7e-08
Adolescence	rs454826	2	21443090	G	T	0.398	cg15246511	2	21267212	0.23383	5.44826	0.03324	6.7e-08
Adolescence	rs430872	2	21443112	T	C	0.398	cg15246511	2	21267212	0.23383	5.44826	0.03324	6.7e-08
Adolescence	rs12052779	2	21333932	C	A	0.343	cg15246511	2	21267212	0.48318	11.5677	0.04666	8.26e-29
Adolescence	rs401211	2	21443465	A	G	0.398	cg15246511	2	21267212	0.23383	5.44826	0.03324	6.7e-08
Adolescence	rs934197	2	21267461	A	G	0.344	cg07636176	2	21267175	0.47498	11.5675	0.06538	8.27e-29
Adolescence	rs437362	2	21446845	C	T	0.398	cg15246511	2	21267212	0.23383	5.44826	0.03324	6.7e-08
Adolescence	rs414611	2	21446994	A	C	0.398	cg15246511	2	21267212	0.23383	5.44826	0.03324	6.7e-08
Adolescence	rs368523	2	21447687	T	C	0.398	cg15246511	2	21267212	0.23383	5.44826	0.03324	6.7e-08
Adolescence	rs384429	2	21447727	A	C	0.398	cg15246511	2	21267212	0.23383	5.44826	0.03324	6.7e-08
Adolescence	rs403772	2	21448480	T	G	0.398	cg15246511	2	21267212	0.23383	5.44826	0.03324	6.7e-08
Adolescence	rs2337383	2	21320516	G	A	0.338	cg07636176	2	21267175	0.48438	11.5597	0.06757	8.95e-29
Adolescence	rs61539677	2	21305195	G	A	0.339	cg07636176	2	21267175	0.48342	11.5555	0.06303	9.33e-29
Adolescence	rs754523	2	21311691	G	A	0.339	cg07636176	2	21267175	0.48342	11.5555	0.06303	9.33e-29
Adolescence	rs62122520	2	21313430	T	G	0.339	cg07636176	2	21267175	0.48342	11.5555	0.06303	9.33e-29
Adolescence	rs56079819	2	21314851	A	G	0.339	cg07636176	2	21267175	0.48342	11.5555	0.06303	9.33e-29
Adolescence	rs312029	2	21461730	C	G	0.124	cg24309555	2	21266956	-0.35043	-5.44569	0.00628	6.79e-08
Adolescence	rs113457017	2	21372014	G	A	0.067	cg00673290	2	21266727	0.46438	5.44427	0.05006	6.84e-08
Adolescence	rs364390	2	21449787	G	A	0.397	cg15246511	2	21267212	0.23403	5.44311	0.03342	6.89e-08
Adolescence	rs431802	2	21449791	G	A	0.397	cg15246511	2	21267212	0.23403	5.44311	0.03342	6.89e-08
Adolescence	rs427642	2	21449940	C	G	0.397	cg15246511	2	21267212	0.23403	5.44311	0.03342	6.89e-08
Adolescence	rs56201838	2	21328501	C	A	0.338	cg07636176	2	21267175	0.48381	11.5079	0.0649	1.5e-28
Adolescence	rs56306424	2	21328665	A	G	0.338	cg07636176	2	21267175	0.48381	11.5079	0.0649	1.5e-28
Adolescence	rs2163203	2	21331137	C	T	0.338	cg07636176	2	21267175	0.48381	11.5079	0.0649	1.5e-28
Adolescence	rs2195597	2	21331185	C	T	0.338	cg07636176	2	21267175	0.48381	11.5079	0.0649	1.5e-28
Adolescence	rs111233436	2	21340378	C	A	0.338	cg07636176	2	21267175	0.48381	11.5079	0.0649	1.5e-28
Adolescence	rs7568899	2	21345292	G	A	0.338	cg07636176	2	21267175	0.48381	11.5079	0.0649	1.5e-28
Adolescence	rs312045	2	21463986	C	T	0.294	cg00673290	2	21266727	-0.25727	-5.44046	0.02473	6.99e-08
Adolescence	rs17395512	2	21346556	C	T	0.338	cg07636176	2	21267175	0.48381	11.5079	0.0649	1.5e-28
Adolescence	rs62135036	2	21348670	G	A	0.338	cg07636176	2	21267175	0.48381	11.5079	0.0649	1.5e-28
Adolescence	rs72782173	2	21348958	C	T	0.338	cg07636176	2	21267175	0.48381	11.5079	0.0649	1.5e-28
Adolescence	rs2115838	2	21350324	A	G	0.338	cg07636176	2	21267175	0.48381	11.5079	0.0649	1.5e-28
Adolescence	rs62122515	2	21295227	A	G	0.357	cg24309555	2	21266956	0.48867	11.4971	0.00929	1.68e-28
Adolescence	rs62122516	2	21295439	T	A	0.357	cg24309555	2	21266956	0.48867	11.4971	0.00929	1.68e-28
Adolescence	rs1367113	2	21295832	A	G	0.357	cg24309555	2	21266956	0.48867	11.4971	0.00929	1.68e-28
Adolescence	rs72073594	2	21319986	D	R	0.343	cg07636176	2	21267175	0.48138	11.4928	0.06265	1.75e-28
Adolescence	rs11693870	2	21320250	C	T	0.343	cg07636176	2	21267175	0.48138	11.4928	0.06265	1.75e-28
Adolescence	rs4665178	2	21321721	G	A	0.343	cg07636176	2	21267175	0.48138	11.4928	0.06265	1.75e-28
Adolescence	rs4665179	2	21321724	C	T	0.343	cg07636176	2	21267175	0.48138	11.4928	0.06265	1.75e-28
Adolescence	rs541041	2	21294975	G	A	0.167	cg24309555	2	21266956	-0.62079	-11.4912	0.01272	1.78e-28
Adolescence	rs62133264	2	21380902	C	T	0.339	cg25071744	2	21266995	0.48276	11.4901	0.03011	1.8e-28
Adolescence	rs9808284	2	21476247	A	C	0.13	cg00673290	2	21266727	-0.35608	-5.43668	0.04156	7.13e-08
Adolescence	rs56350433	2	21298384	A	T	0.339	cg25071744	2	21266995	0.48144	11.4896	0.02972	1.81e-28
Adolescence	rs62122517	2	21298811	A	G	0.339	cg25071744	2	21266995	0.48144	11.4896	0.02972	1.81e-28
Adolescence	rs147360532	2	21299935	D	R	0.339	cg25071744	2	21266995	0.48144	11.4896	0.02972	1.81e-28
Adolescence	rs1429974	2	21300770	A	C	0.339	cg25071744	2	21266995	0.48144	11.4896	0.02972	1.81e-28
Adolescence	rs6708168	2	21301641	A	T	0.339	cg25071744	2	21266995	0.48144	11.4896	0.02972	1.81e-28
Adolescence	rs2195598	2	21303043	T	C	0.339	cg25071744	2	21266995	0.48144	11.4896	0.02972	1.81e-28
Adolescence	rs1897083	2	21297051	G	A	0.337	cg25071744	2	21266995	0.48198	11.489	0.02875	1.82e-28
Adolescence	rs61539677	2	21305195	G	A	0.339	cg25071744	2	21266995	0.48035	11.4884	0.02875	1.83e-28
Adolescence	rs754523	2	21311691	G	A	0.339	cg25071744	2	21266995	0.48035	11.4884	0.02875	1.83e-28
Adolescence	rs62122520	2	21313430	T	G	0.339	cg25071744	2	21266995	0.48035	11.4884	0.02875	1.83e-28
Adolescence	rs56079819	2	21314851	A	G	0.339	cg25071744	2	21266995	0.48035	11.4884	0.02875	1.83e-28
Adolescence	rs13396400	2	21502727	G	A	0.428	cg16723488	2	21266947	0.24062	5.43314	0.02447	7.27e-08
Adolescence	rs563290	2	21288226	G	A	0.166	cg24309555	2	21266956	-0.62093	-11.485	0.01269	1.89e-28
Adolescence	rs562338	2	21288321	A	G	0.166	cg24309555	2	21266956	-0.62093	-11.485	0.01269	1.89e-28
Adolescence	rs581411	2	21289432	G	A	0.166	cg24309555	2	21266956	-0.62093	-11.485	0.01269	1.89e-28
Adolescence	rs580889	2	21290067	C	T	0.166	cg24309555	2	21266956	-0.62093	-11.485	0.01269	1.89e-28
Adolescence	rs548145	2	21291312	T	C	0.166	cg24309555	2	21266956	-0.62093	-11.485	0.01269	1.89e-28
Adolescence	rs668948	2	21291529	G	A	0.166	cg24309555	2	21266956	-0.62093	-11.485	0.01269	1.89e-28
Adolescence	rs201027918	2	21293334	I	R	0.166	cg24309555	2	21266956	-0.62093	-11.485	0.01269	1.89e-28
Adolescence	rs17395333	2	21323369	G	A	0.337	cg07636176	2	21267175	0.48224	11.4781	0.0649	2.02e-28
Adolescence	rs56090741	2	21323651	G	T	0.337	cg07636176	2	21267175	0.48224	11.4781	0.0649	2.02e-28
Adolescence	rs1367117	2	21263900	A	G	0.343	cg25071744	2	21266995	0.47083	11.4685	0.02835	2.23e-28
Adolescence	rs934197	2	21267461	A	G	0.344	cg25071744	2	21266995	0.47083	11.4685	0.02835	2.23e-28
Adolescence	rs11693760	2	21296492	G	A	0.335	cg25071744	2	21266995	0.48152	11.4667	0.03053	2.27e-28
Adolescence	rs11693775	2	21296546	G	A	0.335	cg25071744	2	21266995	0.48152	11.4667	0.03053	2.27e-28
Adolescence	rs72782148	2	21298547	A	T	0.335	cg25071744	2	21266995	0.48152	11.4667	0.03053	2.27e-28
Adolescence	rs11673790	2	21299195	T	C	0.335	cg25071744	2	21266995	0.48152	11.4667	0.03053	2.27e-28
Adolescence	rs17399144	2	21305685	G	A	0.335	cg25071744	2	21266995	0.4804	11.4652	0.03037	2.3e-28
Adolescence	rs4665176	2	21305853	C	T	0.335	cg25071744	2	21266995	0.4804	11.4652	0.03037	2.3e-28
Adolescence	rs6761300	2	21306974	G	A	0.335	cg25071744	2	21266995	0.4804	11.4652	0.03037	2.3e-28
Adolescence	rs515135	2	21286057	T	C	0.166	cg03350299	2	21266960	-0.61799	-11.462	0.01125	2.38e-28
Adolescence	rs563290	2	21288226	G	A	0.166	cg03350299	2	21266960	-0.61799	-11.462	0.01125	2.38e-28
Adolescence	rs562338	2	21288321	A	G	0.166	cg03350299	2	21266960	-0.61799	-11.462	0.01125	2.38e-28
Adolescence	rs581411	2	21289432	G	A	0.166	cg03350299	2	21266960	-0.61799	-11.462	0.01125	2.38e-28
Adolescence	rs580889	2	21290067	C	T	0.166	cg03350299	2	21266960	-0.61799	-11.462	0.01125	2.38e-28
Adolescence	rs548145	2	21291312	T	C	0.166	cg03350299	2	21266960	-0.61799	-11.462	0.01125	2.38e-28
Adolescence	rs668948	2	21291529	G	A	0.166	cg03350299	2	21266960	-0.61799	-11.462	0.01125	2.38e-28
Adolescence	rs201027918	2	21293334	I	R	0.166	cg03350299	2	21266960	-0.61799	-11.462	0.01125	2.38e-28
Adolescence	rs550619	2	21260601	G	A	0.075	cg16306978	2	21266953	-0.44818	-5.42819	0.04542	7.47e-08
Adolescence	rs579826	2	21261507	T	C	0.075	cg16306978	2	21266953	-0.44818	-5.42819	0.04542	7.47e-08
Adolescence	rs541041	2	21294975	G	A	0.167	cg03350299	2	21266960	-0.61675	-11.4446	0.01127	2.83e-28
Adolescence	rs12052779	2	21333932	C	A	0.343	cg07636176	2	21267175	0.4808	11.4409	0.06221	2.94e-28
Adolescence	rs614303	2	21313577	G	A	0.182	cg16306978	2	21266953	-0.61067	-11.421	0.05995	3.58e-28
Adolescence	rs62133262	2	21369926	C	T	0.337	cg25071744	2	21266995	0.47918	11.4116	0.03002	3.93e-28
Adolescence	rs11687710	2	21371068	C	T	0.337	cg25071744	2	21266995	0.47918	11.4116	0.03002	3.93e-28
Adolescence	rs142066046	2	21374231	C	G	0.337	cg25071744	2	21266995	0.47918	11.4116	0.03002	3.93e-28
Adolescence	rs62133264	2	21380902	C	T	0.339	cg07636176	2	21267175	0.48009	11.3986	0.06395	4.47e-28
Adolescence	rs6548010	2	21277922	G	A	0.353	cg24309555	2	21266956	0.48555	11.3965	0.00929	4.57e-28
Adolescence	rs17240441	2	21266774	D	R	0.341	cg07636176	2	21267175	0.46888	11.3947	0.06548	4.65e-28
Adolescence	rs62122514	2	21285711	A	C	0.353	cg24309555	2	21266956	0.48531	11.39	0.00929	4.87e-28
Adolescence	rs11693545	2	21292377	A	C	0.353	cg24309555	2	21266956	0.48531	11.39	0.00929	4.87e-28
Adolescence	rs4665492	2	21294039	C	A	0.353	cg24309555	2	21266956	0.48531	11.39	0.00929	4.87e-28
Adolescence	rs6548011	2	21277932	T	C	0.353	cg24309555	2	21266956	0.486	11.3817	0.00934	5.29e-28
Adolescence	rs934198	2	21278773	T	G	0.353	cg24309555	2	21266956	0.486	11.3817	0.00934	5.29e-28
Adolescence	rs6726115	2	21281097	G	A	0.353	cg24309555	2	21266956	0.486	11.3817	0.00934	5.29e-28
Adolescence	rs520354	2	21259612	G	A	0.482	cg00673290	2	21266727	-0.23962	-5.41781	0.02056	7.9e-08
Adolescence	rs7590135	2	21282902	A	G	0.353	cg24309555	2	21266956	0.486	11.3817	0.00934	5.29e-28
Adolescence	rs62133262	2	21369926	C	T	0.337	cg07636176	2	21267175	0.47862	11.3786	0.06301	5.45e-28
Adolescence	rs11687710	2	21371068	C	T	0.337	cg07636176	2	21267175	0.47862	11.3786	0.06301	5.45e-28
Adolescence	rs142066046	2	21374231	C	G	0.337	cg07636176	2	21267175	0.47862	11.3786	0.06301	5.45e-28
Adolescence	rs2878956	2	21350346	C	A	0.343	cg15246511	2	21267212	0.47348	11.3697	0.04635	5.96e-28
Adolescence	rs7566030	2	21282578	G	C	0.353	cg24309555	2	21266956	0.48401	11.3547	0.00929	6.91e-28
Adolescence	rs312028	2	21460827	T	C	0.24	cg16306978	2	21266953	0.27144	5.41306	0.02229	8.1e-08
Adolescence	rs70939083	2	21467872	D	R	0.124	cg24309555	2	21266956	-0.34886	-5.41294	0.00624	8.11e-08
Adolescence	rs13387827	2	21469152	T	G	0.124	cg24309555	2	21266956	-0.34886	-5.41294	0.00624	8.11e-08
Adolescence	rs13398007	2	21469336	T	C	0.124	cg24309555	2	21266956	-0.34886	-5.41294	0.00624	8.11e-08
Adolescence	rs10170323	2	21469738	T	G	0.124	cg24309555	2	21266956	-0.34886	-5.41294	0.00624	8.11e-08
Adolescence	rs10183198	2	21470987	T	C	0.124	cg24309555	2	21266956	-0.34886	-5.41294	0.00624	8.11e-08
Adolescence	rs568938	2	21303616	C	T	0.184	cg16306978	2	21266953	-0.60162	-11.3436	0.05083	7.72e-28
Adolescence	rs58298631	2	21477012	G	T	0.378	cg07636176	2	21267175	0.23219	5.41032	0.02285	8.22e-08
Adolescence	rs1367117	2	21263900	A	G	0.343	cg25123895	2	21267113	0.48116	11.3112	0.03306	1.06e-27
Adolescence	rs934197	2	21267461	A	G	0.344	cg25123895	2	21267113	0.48116	11.3112	0.03306	1.06e-27
Adolescence	rs7575840	2	21273490	T	G	0.353	cg24309555	2	21266956	0.48338	11.311	0.00928	1.07e-27
Adolescence	rs12052779	2	21333932	C	A	0.343	cg24309555	2	21266956	0.48888	11.2813	0.00921	1.43e-27
Adolescence	rs12997242	2	21381177	A	G	0.441	cg24309555	2	21266956	0.45799	11.2781	0.00936	1.47e-27
Adolescence	rs34468875	2	21383353	T	C	0.441	cg24309555	2	21266956	0.45799	11.2781	0.00936	1.47e-27
Adolescence	rs597331	2	21262427	A	G	0.481	cg00673290	2	21266727	-0.23916	-5.40556	0.02093	8.44e-08
Adolescence	rs11096689	2	21140540	C	T	0.309	cg24309555	2	21266956	0.24756	5.40325	0.00388	8.54e-08
Adolescence	rs17399144	2	21305685	G	A	0.335	cg07636176	2	21267175	0.48535	11.5842	0.06251	7e-29
Adolescence	rs437624	2	21440004	A	G	0.398	cg15246511	2	21267212	0.23383	5.44826	0.03324	6.7e-08
Adolescence	rs434540	2	21442574	A	G	0.398	cg15246511	2	21267212	0.23383	5.44826	0.03324	6.7e-08
Adolescence	rs111826230	2	21378453	G	A	0.089	cg03350299	2	21266960	0.40248	5.39814	0.00425	8.78e-08
Adolescence	rs12997242	2	21381177	A	G	0.441	cg25071744	2	21266995	0.45452	11.5767	0.02914	7.55e-29
Adolescence	rs34468875	2	21383353	T	C	0.441	cg25071744	2	21266995	0.45452	11.5767	0.02914	7.55e-29
Adolescence	rs12714102	2	21246306	C	G	0.08	cg16306978	2	21266953	-0.43279	-5.39552	0.04548	8.91e-08
Adolescence	rs10647267	2	20963937	I	R	0.495	cg07636176	2	21267175	0.2324	5.39388	0.02739	8.98e-08
Adolescence	rs2878956	2	21350346	C	A	0.343	cg25123895	2	21267113	0.48726	11.263	0.02986	1.71e-27
Adolescence	rs478588	2	21297149	A	G	0.184	cg16306978	2	21266953	-0.59787	-11.2621	0.05083	1.73e-27
Adolescence	rs577584	2	21299867	T	A	0.184	cg16306978	2	21266953	-0.59701	-11.2502	0.05064	1.94e-27
Adolescence	rs72073594	2	21319986	D	R	0.343	cg24309555	2	21266956	0.48625	11.2462	0.00928	2.02e-27
Adolescence	rs11693870	2	21320250	C	T	0.343	cg24309555	2	21266956	0.48625	11.2462	0.00928	2.02e-27
Adolescence	rs4665178	2	21321721	G	A	0.343	cg24309555	2	21266956	0.48625	11.2462	0.00928	2.02e-27
Adolescence	rs427075	2	21443169	A	G	0.398	cg15246511	2	21267212	0.23383	5.44826	0.03324	6.7e-08
Adolescence	rs589566	2	21269809	A	G	0.491	cg15246511	2	21267212	0.44457	11.2393	0.04934	2.16e-27
Adolescence	rs1367117	2	21263900	A	G	0.343	cg07636176	2	21267175	0.47498	11.5675	0.06538	8.27e-29
Adolescence	rs411617	2	21444950	T	G	0.398	cg15246511	2	21267212	0.23383	5.44826	0.03324	6.7e-08
Adolescence	rs515135	2	21286057	T	C	0.166	cg24309555	2	21266956	-0.62093	-11.485	0.01269	1.89e-28
Adolescence	rs588245	2	21270057	A	G	0.491	cg15246511	2	21267212	0.44394	11.2209	0.04923	2.59e-27
Adolescence	rs56212928	2	21272763	D	R	0.352	cg24309555	2	21266956	0.47916	11.2044	0.00927	3.05e-27
Adolescence	rs56201838	2	21328501	C	A	0.338	cg24309555	2	21266956	0.48649	11.2022	0.00926	3.11e-27
Adolescence	rs56306424	2	21328665	A	G	0.338	cg24309555	2	21266956	0.48649	11.2022	0.00926	3.11e-27
Adolescence	rs2163203	2	21331137	C	T	0.338	cg24309555	2	21266956	0.48649	11.2022	0.00926	3.11e-27
Adolescence	rs2195597	2	21331185	C	T	0.338	cg24309555	2	21266956	0.48649	11.2022	0.00926	3.11e-27
Adolescence	rs111233436	2	21340378	C	A	0.338	cg24309555	2	21266956	0.48649	11.2022	0.00926	3.11e-27
Adolescence	rs7568899	2	21345292	G	A	0.338	cg24309555	2	21266956	0.48649	11.2022	0.00926	3.11e-27
Adolescence	rs62135035	2	21346521	G	A	0.338	cg24309555	2	21266956	0.48649	11.2022	0.00926	3.11e-27
Adolescence	rs17395512	2	21346556	C	T	0.338	cg24309555	2	21266956	0.48649	11.2022	0.00926	3.11e-27
Adolescence	rs62135036	2	21348670	G	A	0.338	cg24309555	2	21266956	0.48649	11.2022	0.00926	3.11e-27
Adolescence	rs72782173	2	21348958	C	T	0.338	cg24309555	2	21266956	0.48649	11.2022	0.00926	3.11e-27
Adolescence	rs2115838	2	21350324	A	G	0.338	cg24309555	2	21266956	0.48649	11.2022	0.00926	3.11e-27
Adolescence	rs78120576	2	21318633	C	T	0.338	cg07636176	2	21267175	0.48438	11.5597	0.06757	8.95e-29
Adolescence	rs312985	2	21378805	A	G	0.183	cg16306978	2	21266953	-0.6014	-11.176	0.05484	4.02e-27
Adolescence	rs17240441	2	21266774	D	R	0.341	cg25123895	2	21267113	0.47607	11.1728	0.03299	4.15e-27
Adolescence	rs78120576	2	21318633	C	T	0.338	cg24309555	2	21266956	0.48386	11.1672	0.00928	4.38e-27
Adolescence	rs2337383	2	21320516	G	A	0.338	cg24309555	2	21266956	0.48386	11.1672	0.00928	4.38e-27
Adolescence	rs17395333	2	21323369	G	A	0.337	cg24309555	2	21266956	0.48433	11.158	0.00926	4.8e-27
Adolescence	rs56090741	2	21323651	G	T	0.337	cg24309555	2	21266956	0.48433	11.158	0.00926	4.8e-27
Adolescence	rs1652423	2	21383524	G	A	0.184	cg16306978	2	21266953	-0.59989	-11.1508	0.05509	5.15e-27
Adolescence	rs139313954	2	21327042	D	R	0.337	cg24309555	2	21266956	0.48379	11.1439	0.00923	5.51e-27
Adolescence	rs312970	2	21369815	A	T	0.182	cg16306978	2	21266953	-0.59997	-11.1386	0.05505	5.8e-27
Adolescence	rs312979	2	21377705	A	T	0.182	cg16306978	2	21266953	-0.59997	-11.1386	0.05505	5.8e-27
Adolescence	rs72336878	2	21377928	D	R	0.182	cg16306978	2	21266953	-0.59997	-11.1386	0.05505	5.8e-27
Adolescence	rs312981	2	21378151	G	A	0.182	cg16306978	2	21266953	-0.59997	-11.1386	0.05505	5.8e-27
Adolescence	rs312982	2	21378226	G	C	0.182	cg16306978	2	21266953	-0.59997	-11.1386	0.05505	5.8e-27
Adolescence	rs34908258	2	21378431	D	R	0.182	cg16306978	2	21266953	-0.59997	-11.1386	0.05505	5.8e-27
Adolescence	rs200200214	2	21378433	D	R	0.182	cg16306978	2	21266953	-0.59997	-11.1386	0.05505	5.8e-27
Adolescence	rs312983	2	21378580	A	C	0.182	cg16306978	2	21266953	-0.59997	-11.1386	0.05505	5.8e-27
Adolescence	rs312984	2	21378778	C	T	0.182	cg16306978	2	21266953	-0.59997	-11.1386	0.05505	5.8e-27
Adolescence	rs151224593	2	21379144	D	R	0.182	cg16306978	2	21266953	-0.59997	-11.1386	0.05505	5.8e-27
Adolescence	rs529396	2	21381268	G	C	0.182	cg16306978	2	21266953	-0.59997	-11.1386	0.05505	5.8e-27
Adolescence	rs530474	2	21381435	G	A	0.182	cg16306978	2	21266953	-0.59997	-11.1386	0.05505	5.8e-27
Adolescence	rs559318	2	21381490	C	T	0.182	cg16306978	2	21266953	-0.59997	-11.1386	0.05505	5.8e-27
Adolescence	rs532300	2	21381608	C	A	0.182	cg16306978	2	21266953	-0.59997	-11.1386	0.05505	5.8e-27
Adolescence	rs533211	2	21381702	G	A	0.182	cg16306978	2	21266953	-0.59997	-11.1386	0.05505	5.8e-27
Adolescence	rs557197	2	21381781	T	G	0.182	cg16306978	2	21266953	-0.59997	-11.1386	0.05505	5.8e-27
Adolescence	rs34416543	2	21382105	I	R	0.182	cg16306978	2	21266953	-0.59997	-11.1386	0.05505	5.8e-27
Adolescence	rs11388395	2	21382319	I	R	0.182	cg16306978	2	21266953	-0.59997	-11.1386	0.05505	5.8e-27
Adolescence	rs560522	2	21382363	A	C	0.182	cg16306978	2	21266953	-0.59997	-11.1386	0.05505	5.8e-27
Adolescence	rs527034	2	21382786	C	A	0.182	cg16306978	2	21266953	-0.59997	-11.1386	0.05505	5.8e-27
Adolescence	rs525172	2	21382976	T	G	0.182	cg16306978	2	21266953	-0.59997	-11.1386	0.05505	5.8e-27
Adolescence	rs479413	2	21383279	T	G	0.182	cg16306978	2	21266953	-0.59997	-11.1386	0.05505	5.8e-27
Adolescence	rs480488	2	21383434	A	G	0.182	cg16306978	2	21266953	-0.59997	-11.1386	0.05505	5.8e-27
Adolescence	rs4560142	2	21383717	C	T	0.182	cg16306978	2	21266953	-0.59997	-11.1386	0.05505	5.8e-27
Adolescence	rs4591370	2	21383742	A	G	0.182	cg16306978	2	21266953	-0.59997	-11.1386	0.05505	5.8e-27
Adolescence	rs1652422	2	21383841	A	G	0.182	cg16306978	2	21266953	-0.59997	-11.1386	0.05505	5.8e-27
Adolescence	rs1652421	2	21383848	A	G	0.182	cg16306978	2	21266953	-0.59997	-11.1386	0.05505	5.8e-27
Adolescence	rs1652420	2	21383881	A	T	0.182	cg16306978	2	21266953	-0.59997	-11.1386	0.05505	5.8e-27
Adolescence	rs1712247	2	21383951	C	T	0.182	cg16306978	2	21266953	-0.59997	-11.1386	0.05505	5.8e-27
Adolescence	rs492255	2	21384272	C	T	0.182	cg16306978	2	21266953	-0.59997	-11.1386	0.05505	5.8e-27
Adolescence	rs544450	2	21384358	T	C	0.182	cg16306978	2	21266953	-0.59997	-11.1386	0.05505	5.8e-27
Adolescence	rs544655	2	21384441	G	T	0.182	cg16306978	2	21266953	-0.59997	-11.1386	0.05505	5.8e-27
Adolescence	rs547179	2	21384662	A	G	0.182	cg16306978	2	21266953	-0.59997	-11.1386	0.05505	5.8e-27
Adolescence	rs547235	2	21384682	A	G	0.182	cg16306978	2	21266953	-0.59997	-11.1386	0.05505	5.8e-27
Adolescence	rs547239	2	21384686	T	A	0.182	cg16306978	2	21266953	-0.59997	-11.1386	0.05505	5.8e-27
Adolescence	rs572246	2	21385149	T	C	0.182	cg16306978	2	21266953	-0.59997	-11.1386	0.05505	5.8e-27
Adolescence	rs573314	2	21385161	C	G	0.182	cg16306978	2	21266953	-0.59997	-11.1386	0.05505	5.8e-27
Adolescence	rs548506	2	21385541	A	G	0.182	cg16306978	2	21266953	-0.59997	-11.1386	0.05505	5.8e-27
Adolescence	rs1652419	2	21385649	C	T	0.182	cg16306978	2	21266953	-0.59997	-11.1386	0.05505	5.8e-27
Adolescence	rs1712250	2	21386058	C	T	0.182	cg16306978	2	21266953	-0.59997	-11.1386	0.05505	5.8e-27
Adolescence	rs1367120	2	21386304	T	C	0.182	cg16306978	2	21266953	-0.59997	-11.1386	0.05505	5.8e-27
Adolescence	rs1367119	2	21386375	A	G	0.182	cg16306978	2	21266953	-0.59997	-11.1386	0.05505	5.8e-27
Adolescence	rs522963	2	21386957	T	C	0.182	cg16306978	2	21266953	-0.59997	-11.1386	0.05505	5.8e-27
Adolescence	rs522250	2	21387113	T	C	0.182	cg16306978	2	21266953	-0.59997	-11.1386	0.05505	5.8e-27
Adolescence	rs529697	2	21387948	G	T	0.182	cg16306978	2	21266953	-0.59997	-11.1386	0.05505	5.8e-27
Adolescence	rs490757	2	21388224	C	T	0.182	cg16306978	2	21266953	-0.59997	-11.1386	0.05505	5.8e-27
Adolescence	rs11383998	2	21388401	I	R	0.182	cg16306978	2	21266953	-0.59997	-11.1386	0.05505	5.8e-27
Adolescence	rs1652418	2	21388456	T	C	0.182	cg16306978	2	21266953	-0.59997	-11.1386	0.05505	5.8e-27
Adolescence	rs538928	2	21389019	A	G	0.182	cg16306978	2	21266953	-0.59997	-11.1386	0.05505	5.8e-27
Adolescence	rs560844	2	21389108	A	G	0.182	cg16306978	2	21266953	-0.59997	-11.1386	0.05505	5.8e-27
Adolescence	rs563696	2	21389430	T	A	0.182	cg16306978	2	21266953	-0.59997	-11.1386	0.05505	5.8e-27
Adolescence	rs475887	2	21389485	T	G	0.182	cg16306978	2	21266953	-0.59997	-11.1386	0.05505	5.8e-27
Adolescence	rs479545	2	21389897	T	C	0.182	cg16306978	2	21266953	-0.59997	-11.1386	0.05505	5.8e-27
Adolescence	rs501863	2	21390000	G	A	0.182	cg16306978	2	21266953	-0.59997	-11.1386	0.05505	5.8e-27
Adolescence	rs138073775	2	21323862	I	R	0.336	cg24309555	2	21266956	0.48329	11.1369	0.00925	5.9e-27
Adolescence	rs56350433	2	21298384	A	T	0.339	cg24309555	2	21266956	0.48276	11.1314	0.00925	6.22e-27
Adolescence	rs62122517	2	21298811	A	G	0.339	cg24309555	2	21266956	0.48276	11.1314	0.00925	6.22e-27
Adolescence	rs147360532	2	21299935	D	R	0.339	cg24309555	2	21266956	0.48276	11.1314	0.00925	6.22e-27
Adolescence	rs1429974	2	21300770	A	C	0.339	cg24309555	2	21266956	0.48276	11.1314	0.00925	6.22e-27
Adolescence	rs6708168	2	21301641	A	T	0.339	cg24309555	2	21266956	0.48276	11.1314	0.00925	6.22e-27
Adolescence	rs2195598	2	21303043	T	C	0.339	cg24309555	2	21266956	0.48276	11.1314	0.00925	6.22e-27
Adolescence	rs61539677	2	21305195	G	A	0.339	cg24309555	2	21266956	0.4814	11.1232	0.00919	6.74e-27
Adolescence	rs754523	2	21311691	G	A	0.339	cg24309555	2	21266956	0.4814	11.1232	0.00919	6.74e-27
Adolescence	rs62122520	2	21313430	T	G	0.339	cg24309555	2	21266956	0.4814	11.1232	0.00919	6.74e-27
Adolescence	rs56079819	2	21314851	A	G	0.339	cg24309555	2	21266956	0.4814	11.1232	0.00919	6.74e-27
Adolescence	rs1367117	2	21263900	A	G	0.343	cg24309555	2	21266956	0.47234	11.117	0.00866	7.16e-27
Adolescence	rs934197	2	21267461	A	G	0.344	cg24309555	2	21266956	0.47234	11.117	0.00866	7.16e-27
Adolescence	rs558130	2	21381689	T	G	0.183	cg16306978	2	21266953	-0.59688	-11.0798	0.05484	1.03e-26
Adolescence	rs480732	2	21390149	A	T	0.183	cg16306978	2	21266953	-0.59679	-11.0777	0.05507	1.05e-26
Adolescence	rs480787	2	21390169	A	G	0.183	cg16306978	2	21266953	-0.59679	-11.0777	0.05507	1.05e-26
Adolescence	rs36058849	2	21390309	D	R	0.183	cg16306978	2	21266953	-0.59679	-11.0777	0.05507	1.05e-26
Adolescence	rs483436	2	21390407	G	A	0.183	cg16306978	2	21266953	-0.59679	-11.0777	0.05507	1.05e-26
Adolescence	rs486139	2	21390674	G	A	0.183	cg16306978	2	21266953	-0.59679	-11.0777	0.05507	1.05e-26
Adolescence	rs489010	2	21390992	G	A	0.183	cg16306978	2	21266953	-0.59679	-11.0777	0.05507	1.05e-26
Adolescence	rs514757	2	21391531	G	A	0.183	cg16306978	2	21266953	-0.59679	-11.0777	0.05507	1.05e-26
Adolescence	rs538528	2	21391740	T	C	0.183	cg16306978	2	21266953	-0.59679	-11.0777	0.05507	1.05e-26
Adolescence	rs518280	2	21391892	G	A	0.183	cg16306978	2	21266953	-0.59679	-11.0777	0.05507	1.05e-26
Adolescence	rs540439	2	21391978	C	T	0.183	cg16306978	2	21266953	-0.59679	-11.0777	0.05507	1.05e-26
Adolescence	rs563280	2	21392153	T	G	0.183	cg16306978	2	21266953	-0.59679	-11.0777	0.05507	1.05e-26
Adolescence	rs564073	2	21392213	A	T	0.183	cg16306978	2	21266953	-0.59679	-11.0777	0.05507	1.05e-26
Adolescence	rs542261	2	21392229	G	A	0.183	cg16306978	2	21266953	-0.59679	-11.0777	0.05507	1.05e-26
Adolescence	rs34878249	2	21392280	D	R	0.183	cg16306978	2	21266953	-0.59679	-11.0777	0.05507	1.05e-26
Adolescence	rs565894	2	21392426	T	C	0.183	cg16306978	2	21266953	-0.59679	-11.0777	0.05507	1.05e-26
Adolescence	rs566913	2	21392570	C	T	0.183	cg16306978	2	21266953	-0.59679	-11.0777	0.05507	1.05e-26
Adolescence	rs568740	2	21392744	C	T	0.183	cg16306978	2	21266953	-0.59679	-11.0777	0.05507	1.05e-26
Adolescence	rs548594	2	21392918	T	C	0.183	cg16306978	2	21266953	-0.59679	-11.0777	0.05507	1.05e-26
Adolescence	rs484802	2	21393321	C	T	0.183	cg16306978	2	21266953	-0.59679	-11.0777	0.05507	1.05e-26
Adolescence	rs484906	2	21393348	G	T	0.183	cg16306978	2	21266953	-0.59679	-11.0777	0.05507	1.05e-26
Adolescence	rs576203	2	21393623	A	G	0.183	cg16306978	2	21266953	-0.59679	-11.0777	0.05507	1.05e-26
Adolescence	rs488507	2	21393689	G	T	0.183	cg16306978	2	21266953	-0.59679	-11.0777	0.05507	1.05e-26
Adolescence	rs578095	2	21393866	A	G	0.183	cg16306978	2	21266953	-0.59679	-11.0777	0.05507	1.05e-26
Adolescence	rs578864	2	21393937	C	G	0.183	cg16306978	2	21266953	-0.59679	-11.0777	0.05507	1.05e-26
Adolescence	rs492364	2	21394199	C	T	0.183	cg16306978	2	21266953	-0.59679	-11.0777	0.05507	1.05e-26
Adolescence	rs492365	2	21394201	A	G	0.183	cg16306978	2	21266953	-0.59679	-11.0777	0.05507	1.05e-26
Adolescence	rs492494	2	21394248	C	T	0.183	cg16306978	2	21266953	-0.59679	-11.0777	0.05507	1.05e-26
Adolescence	rs493404	2	21394340	G	A	0.183	cg16306978	2	21266953	-0.59679	-11.0777	0.05507	1.05e-26
Adolescence	rs549959	2	21394458	T	C	0.183	cg16306978	2	21266953	-0.59679	-11.0777	0.05507	1.05e-26
Adolescence	rs496100	2	21394614	A	G	0.183	cg16306978	2	21266953	-0.59679	-11.0777	0.05507	1.05e-26
Adolescence	rs553523	2	21394798	T	G	0.183	cg16306978	2	21266953	-0.59679	-11.0777	0.05507	1.05e-26
Adolescence	rs554414	2	21394892	T	C	0.183	cg16306978	2	21266953	-0.59679	-11.0777	0.05507	1.05e-26
Adolescence	rs556504	2	21395261	C	G	0.183	cg16306978	2	21266953	-0.59679	-11.0777	0.05507	1.05e-26
Adolescence	rs557316	2	21395337	A	G	0.183	cg16306978	2	21266953	-0.59679	-11.0777	0.05507	1.05e-26
Adolescence	rs558342	2	21395469	G	A	0.183	cg16306978	2	21266953	-0.59679	-11.0777	0.05507	1.05e-26
Adolescence	rs559967	2	21395598	A	G	0.183	cg16306978	2	21266953	-0.59679	-11.0777	0.05507	1.05e-26
Adolescence	rs561850	2	21395805	A	G	0.183	cg16306978	2	21266953	-0.59679	-11.0777	0.05507	1.05e-26
Adolescence	rs473269	2	21395830	T	C	0.183	cg16306978	2	21266953	-0.59679	-11.0777	0.05507	1.05e-26
Adolescence	rs563719	2	21396001	C	A	0.183	cg16306978	2	21266953	-0.59679	-11.0777	0.05507	1.05e-26
Adolescence	rs563752	2	21396013	A	G	0.183	cg16306978	2	21266953	-0.59679	-11.0777	0.05507	1.05e-26
Adolescence	rs477146	2	21396334	A	G	0.183	cg16306978	2	21266953	-0.59679	-11.0777	0.05507	1.05e-26
Adolescence	rs13411597	2	21396488	G	A	0.183	cg16306978	2	21266953	-0.59679	-11.0777	0.05507	1.05e-26
Adolescence	rs1652417	2	21396517	T	C	0.183	cg16306978	2	21266953	-0.59679	-11.0777	0.05507	1.05e-26
Adolescence	rs1712251	2	21396551	G	A	0.183	cg16306978	2	21266953	-0.59679	-11.0777	0.05507	1.05e-26
Adolescence	rs1652416	2	21396609	A	G	0.183	cg16306978	2	21266953	-0.59679	-11.0777	0.05507	1.05e-26
Adolescence	rs483621	2	21397035	T	A	0.183	cg16306978	2	21266953	-0.59679	-11.0777	0.05507	1.05e-26
Adolescence	rs506585	2	21397182	G	A	0.183	cg16306978	2	21266953	-0.59679	-11.0777	0.05507	1.05e-26
Adolescence	rs507616	2	21397321	G	C	0.183	cg16306978	2	21266953	-0.59679	-11.0777	0.05507	1.05e-26
Adolescence	rs531380	2	21397561	C	G	0.183	cg16306978	2	21266953	-0.59679	-11.0777	0.05507	1.05e-26
Adolescence	rs532225	2	21397637	T	C	0.183	cg16306978	2	21266953	-0.59679	-11.0777	0.05507	1.05e-26
Adolescence	rs560408	2	21398379	T	C	0.183	cg16306978	2	21266953	-0.59679	-11.0777	0.05507	1.05e-26
Adolescence	rs541569	2	21398768	G	A	0.183	cg16306978	2	21266953	-0.59679	-11.0777	0.05507	1.05e-26
Adolescence	rs11321159	2	21398857	D	R	0.183	cg16306978	2	21266953	-0.59679	-11.0777	0.05507	1.05e-26
Adolescence	rs544039	2	21398985	C	A	0.183	cg16306978	2	21266953	-0.59679	-11.0777	0.05507	1.05e-26
Adolescence	rs478442	2	21399216	G	T	0.183	cg16306978	2	21266953	-0.59679	-11.0777	0.05507	1.05e-26
Adolescence	rs570033	2	21399567	C	G	0.183	cg16306978	2	21266953	-0.59679	-11.0777	0.05507	1.05e-26
Adolescence	rs574461	2	21400013	A	G	0.183	cg16306978	2	21266953	-0.59679	-11.0777	0.05507	1.05e-26
Adolescence	rs487858	2	21400305	G	A	0.183	cg16306978	2	21266953	-0.59679	-11.0777	0.05507	1.05e-26
Adolescence	rs494315	2	21400950	C	T	0.183	cg16306978	2	21266953	-0.59679	-11.0777	0.05507	1.05e-26
Adolescence	rs494465	2	21401010	C	T	0.183	cg16306978	2	21266953	-0.59679	-11.0777	0.05507	1.05e-26
Adolescence	rs522822	2	21401851	A	G	0.183	cg16306978	2	21266953	-0.59679	-11.0777	0.05507	1.05e-26
Adolescence	rs62133264	2	21380902	C	T	0.339	cg24309555	2	21266956	0.48184	11.0729	0.00925	1.1e-26
Adolescence	rs1897083	2	21297051	G	A	0.337	cg24309555	2	21266956	0.4811	11.0728	0.00919	1.1e-26
Adolescence	rs17240441	2	21266774	D	R	0.341	cg24309555	2	21266956	0.47072	11.0725	0.0087	1.11e-26
Adolescence	rs34006806	2	21116850	A	G	0.125	cg25071744	2	21266995	-0.34036	-5.42105	0.01087	7.76e-08
Adolescence	rs67545613	2	21371195	D	R	0.184	cg16306978	2	21266953	-0.59376	-11.0714	0.05028	1.12e-26
Adolescence	rs2878956	2	21350346	C	A	0.343	cg25071744	2	21266995	0.46315	11.044	0.02808	1.46e-26
Adolescence	rs11693760	2	21296492	G	A	0.335	cg24309555	2	21266956	0.4799	11.032	0.00918	1.64e-26
Adolescence	rs11693775	2	21296546	G	A	0.335	cg24309555	2	21266956	0.4799	11.032	0.00918	1.64e-26
Adolescence	rs72782148	2	21298547	A	T	0.335	cg24309555	2	21266956	0.4799	11.032	0.00918	1.64e-26
Adolescence	rs11673790	2	21299195	T	C	0.335	cg24309555	2	21266956	0.4799	11.032	0.00918	1.64e-26
Adolescence	rs17399144	2	21305685	G	A	0.335	cg24309555	2	21266956	0.47853	11.0238	0.00917	1.77e-26
Adolescence	rs4665176	2	21305853	C	T	0.335	cg24309555	2	21266956	0.47853	11.0238	0.00917	1.77e-26
Adolescence	rs6761300	2	21306974	G	A	0.335	cg24309555	2	21266956	0.47853	11.0238	0.00917	1.77e-26
Adolescence	rs312944	2	21325188	A	T	0.182	cg16306978	2	21266953	-0.59414	-11.0145	0.05505	1.94e-26
Adolescence	rs200202030	2	21339931	D	R	0.182	cg16306978	2	21266953	-0.59414	-11.0145	0.05505	1.94e-26
Adolescence	rs312953	2	21339932	G	A	0.182	cg16306978	2	21266953	-0.59414	-11.0145	0.05505	1.94e-26
Adolescence	rs502323	2	21403297	A	C	0.182	cg16306978	2	21266953	-0.59646	-11.0052	0.05961	2.12e-26
Adolescence	rs504091	2	21403481	T	G	0.182	cg16306978	2	21266953	-0.59646	-11.0052	0.05961	2.12e-26
Adolescence	rs486246	2	21406751	G	A	0.182	cg16306978	2	21266953	-0.59646	-11.0052	0.05961	2.12e-26
Adolescence	rs312936	2	21408647	T	A	0.182	cg16306978	2	21266953	-0.59646	-11.0052	0.05961	2.12e-26
Adolescence	rs142786027	2	21413178	G	C	0.182	cg16306978	2	21266953	-0.59646	-11.0052	0.05961	2.12e-26
Adolescence	rs141479646	2	21413218	A	G	0.182	cg16306978	2	21266953	-0.59646	-11.0052	0.05961	2.12e-26
Adolescence	rs6548010	2	21277922	G	A	0.353	cg16306978	2	21266953	0.47647	11.001	0.04154	2.21e-26
Adolescence	rs145700744	2	21313778	D	R	0.294	cg25123895	2	21267113	0.50097	10.9936	0.02834	2.38e-26
Adolescence	rs504616	2	21414020	C	G	0.183	cg16306978	2	21266953	-0.58943	-10.972	0.05048	2.93e-26
Adolescence	rs62122515	2	21295227	A	G	0.357	cg16306978	2	21266953	0.4745	10.964	0.04057	3.17e-26
Adolescence	rs62122516	2	21295439	T	A	0.357	cg16306978	2	21266953	0.4745	10.964	0.04057	3.17e-26
Adolescence	rs1367113	2	21295832	A	G	0.357	cg16306978	2	21266953	0.4745	10.964	0.04057	3.17e-26
Adolescence	rs2878956	2	21350346	C	A	0.343	cg07636176	2	21267175	0.46072	10.9608	0.06005	3.27e-26
Adolescence	rs6548011	2	21277932	T	C	0.353	cg16306978	2	21266953	0.47587	10.9595	0.04052	3.31e-26
Adolescence	rs934198	2	21278773	T	G	0.353	cg16306978	2	21266953	0.47587	10.9595	0.04052	3.31e-26
Adolescence	rs6726115	2	21281097	G	A	0.353	cg16306978	2	21266953	0.47587	10.9595	0.04052	3.31e-26
Adolescence	rs1367115	2	21282015	T	C	0.353	cg16306978	2	21266953	0.47587	10.9595	0.04052	3.31e-26
Adolescence	rs7590135	2	21282902	A	G	0.353	cg16306978	2	21266953	0.47587	10.9595	0.04052	3.31e-26
Adolescence	rs62135035	2	21346521	G	A	0.338	cg07636176	2	21267175	0.48381	11.5079	0.0649	1.5e-28
Adolescence	rs754524	2	21311541	G	T	0.295	cg25123895	2	21267113	0.49889	10.9377	0.02802	4.08e-26
Adolescence	rs7566030	2	21282578	G	C	0.353	cg16306978	2	21266953	0.47392	10.9337	0.04023	4.24e-26
Adolescence	rs503105	2	21315664	C	T	0.18	cg16306978	2	21266953	-0.59126	-10.9327	0.05507	4.28e-26
Adolescence	rs62122514	2	21285711	A	C	0.353	cg16306978	2	21266953	0.47381	10.9309	0.04023	4.36e-26
Adolescence	rs11693545	2	21292377	A	C	0.353	cg16306978	2	21266953	0.47381	10.9309	0.04023	4.36e-26
Adolescence	rs4665492	2	21294039	C	A	0.353	cg16306978	2	21266953	0.47381	10.9309	0.04023	4.36e-26
Adolescence	rs512535	2	21267782	T	C	0.486	cg15246511	2	21267212	0.43024	10.9255	0.04883	4.59e-26
Adolescence	rs7575840	2	21273490	T	G	0.353	cg16306978	2	21266953	0.47372	10.9028	0.04031	5.71e-26
Adolescence	rs75404393	2	21382623	T	G	0.19	cg16306978	2	21266953	-0.58015	-10.8989	0.05461	5.93e-26
Adolescence	rs528113	2	21382624	G	T	0.19	cg16306978	2	21266953	-0.58015	-10.8989	0.05461	5.93e-26
Adolescence	rs62133262	2	21369926	C	T	0.337	cg24309555	2	21266956	0.4743	10.8939	0.00912	6.22e-26
Adolescence	rs11687710	2	21371068	C	T	0.337	cg24309555	2	21266956	0.4743	10.8939	0.00912	6.22e-26
Adolescence	rs142066046	2	21374231	C	G	0.337	cg24309555	2	21266956	0.4743	10.8939	0.00912	6.22e-26
Adolescence	rs145700744	2	21313778	D	R	0.294	cg07636176	2	21267175	0.48055	10.8772	0.06735	7.31e-26
Adolescence	rs66702176	2	21399973	D	R	0.185	cg16306978	2	21266953	-0.58242	-10.8428	0.05028	1.02e-25
Adolescence	rs540897	2	21383982	A	G	0.186	cg16306978	2	21266953	-0.57405	-10.8234	0.04978	1.22e-25
Adolescence	rs1367117	2	21263900	A	G	0.343	cg15246511	2	21267212	0.44592	10.8141	0.04552	1.34e-25
Adolescence	rs934197	2	21267461	A	G	0.344	cg15246511	2	21267212	0.44592	10.8141	0.04552	1.34e-25
Adolescence	rs568938	2	21303616	C	T	0.184	cg25071744	2	21266995	-0.55325	-10.8128	0.03024	1.35e-25
Adolescence	rs12052779	2	21333932	C	A	0.343	cg16306978	2	21266953	0.47648	10.8065	0.03971	1.44e-25
Adolescence	rs754524	2	21311541	G	T	0.295	cg07636176	2	21267175	0.47777	10.8019	0.06722	1.5e-25
Adolescence	rs72073594	2	21319986	D	R	0.343	cg16306978	2	21266953	0.47486	10.7977	0.04007	1.56e-25
Adolescence	rs11693870	2	21320250	C	T	0.343	cg16306978	2	21266953	0.47486	10.7977	0.04007	1.56e-25
Adolescence	rs4665178	2	21321721	G	A	0.343	cg16306978	2	21266953	0.47486	10.7977	0.04007	1.56e-25
Adolescence	rs4665179	2	21321724	C	T	0.343	cg16306978	2	21266953	0.47486	10.7977	0.04007	1.56e-25
Adolescence	rs17240441	2	21266774	D	R	0.341	cg15246511	2	21267212	0.44527	10.7954	0.04516	1.6e-25
Adolescence	rs478588	2	21297149	A	G	0.184	cg25071744	2	21266995	-0.55166	-10.7773	0.03034	1.9e-25
Adolescence	rs56201838	2	21328501	C	A	0.338	cg16306978	2	21266953	0.47583	10.7748	0.03952	1.95e-25
Adolescence	rs56306424	2	21328665	A	G	0.338	cg16306978	2	21266953	0.47583	10.7748	0.03952	1.95e-25
Adolescence	rs2163203	2	21331137	C	T	0.338	cg16306978	2	21266953	0.47583	10.7748	0.03952	1.95e-25
Adolescence	rs2195597	2	21331185	C	T	0.338	cg16306978	2	21266953	0.47583	10.7748	0.03952	1.95e-25
Adolescence	rs111233436	2	21340378	C	A	0.338	cg16306978	2	21266953	0.47583	10.7748	0.03952	1.95e-25
Adolescence	rs7568899	2	21345292	G	A	0.338	cg16306978	2	21266953	0.47583	10.7748	0.03952	1.95e-25
Adolescence	rs62135035	2	21346521	G	A	0.338	cg16306978	2	21266953	0.47583	10.7748	0.03952	1.95e-25
Adolescence	rs17395512	2	21346556	C	T	0.338	cg16306978	2	21266953	0.47583	10.7748	0.03952	1.95e-25
Adolescence	rs62135036	2	21348670	G	A	0.338	cg16306978	2	21266953	0.47583	10.7748	0.03952	1.95e-25
Adolescence	rs72782173	2	21348958	C	T	0.338	cg16306978	2	21266953	0.47583	10.7748	0.03952	1.95e-25
Adolescence	rs2115838	2	21350324	A	G	0.338	cg16306978	2	21266953	0.47583	10.7748	0.03952	1.95e-25
Adolescence	rs577584	2	21299867	T	A	0.184	cg25071744	2	21266995	-0.55121	-10.7736	0.03028	1.97e-25
Adolescence	rs138073775	2	21323862	I	R	0.336	cg07636176	2	21267175	0.48243	11.49	0.06395	1.8e-28
Adolescence	rs2337383	2	21320516	G	A	0.338	cg16306978	2	21266953	0.47421	10.766	0.03988	2.12e-25
Adolescence	rs12997242	2	21381177	A	G	0.441	cg16306978	2	21266953	0.445	10.7656	0.04214	2.13e-25
Adolescence	rs34468875	2	21383353	T	C	0.441	cg16306978	2	21266953	0.445	10.7656	0.04214	2.13e-25
Adolescence	rs139313954	2	21327042	D	R	0.337	cg16306978	2	21266953	0.4748	10.7607	0.03944	2.23e-25
Adolescence	rs17042000	2	21422928	T	C	0.18	cg16306978	2	21266953	-0.57868	-10.7597	0.04948	2.25e-25
Adolescence	rs2878956	2	21350346	C	A	0.343	cg24309555	2	21266956	0.46655	10.7592	0.00904	2.26e-25
Adolescence	rs614303	2	21313577	G	A	0.182	cg25071744	2	21266995	-0.55576	-10.7571	0.03131	2.31e-25
Adolescence	rs56212928	2	21272763	D	R	0.352	cg16306978	2	21266953	0.46765	10.7506	0.03966	2.45e-25
Adolescence	rs62122514	2	21285711	A	C	0.353	cg03350299	2	21266960	0.45953	10.7361	0.00844	2.81e-25
Adolescence	rs11693545	2	21292377	A	C	0.353	cg03350299	2	21266960	0.45953	10.7361	0.00844	2.81e-25
Adolescence	rs4665492	2	21294039	C	A	0.353	cg03350299	2	21266960	0.45953	10.7361	0.00844	2.81e-25
Adolescence	rs6548010	2	21277922	G	A	0.353	cg03350299	2	21266960	0.45923	10.7281	0.00844	3.04e-25
Adolescence	rs5829773	2	21381292	I	R	0.188	cg16306978	2	21266953	-0.57602	-10.7258	0.05003	3.11e-25
Adolescence	rs570877	2	21251040	T	G	0.075	cg25071744	2	21266995	-0.42897	-5.43522	0.02381	7.19e-08
Adolescence	rs6548011	2	21277932	T	C	0.353	cg03350299	2	21266960	0.45931	10.7053	0.00843	3.77e-25
Adolescence	rs934198	2	21278773	T	G	0.353	cg03350299	2	21266960	0.45931	10.7053	0.00843	3.77e-25
Adolescence	rs6726115	2	21281097	G	A	0.353	cg03350299	2	21266960	0.45931	10.7053	0.00843	3.77e-25
Adolescence	rs1367115	2	21282015	T	C	0.353	cg03350299	2	21266960	0.45931	10.7053	0.00843	3.77e-25
Adolescence	rs7590135	2	21282902	A	G	0.353	cg03350299	2	21266960	0.45931	10.7053	0.00843	3.77e-25
Adolescence	rs1712246	2	21383514	G	A	0.186	cg16306978	2	21266953	-0.57715	-10.7009	0.05461	3.93e-25
Adolescence	rs1652423	2	21383524	G	A	0.184	cg25071744	2	21266995	-0.55422	-10.687	0.03073	4.49e-25
Adolescence	rs61539677	2	21305195	G	A	0.339	cg16306978	2	21266953	0.47036	10.687	0.03993	4.49e-25
Adolescence	rs754523	2	21311691	G	A	0.339	cg16306978	2	21266953	0.47036	10.687	0.03993	4.49e-25
Adolescence	rs62122520	2	21313430	T	G	0.339	cg16306978	2	21266953	0.47036	10.687	0.03993	4.49e-25
Adolescence	rs56079819	2	21314851	A	G	0.339	cg16306978	2	21266953	0.47036	10.687	0.03993	4.49e-25
Adolescence	rs66984774	2	21310227	D	R	0.462	cg15246511	2	21267212	0.42679	10.683	0.04855	4.66e-25
Adolescence	rs7575840	2	21273490	T	G	0.353	cg03350299	2	21266960	0.45841	10.6814	0.00842	4.73e-25
Adolescence	rs7566030	2	21282578	G	C	0.353	cg03350299	2	21266960	0.45743	10.6803	0.00841	4.78e-25
Adolescence	rs17395333	2	21323369	G	A	0.337	cg16306978	2	21266953	0.47164	10.6794	0.03952	4.82e-25
Adolescence	rs56090741	2	21323651	G	T	0.337	cg16306978	2	21266953	0.47164	10.6794	0.03952	4.82e-25
Adolescence	rs138073775	2	21323862	I	R	0.336	cg16306978	2	21266953	0.47135	10.6779	0.03946	4.89e-25
Adolescence	rs62133264	2	21380902	C	T	0.339	cg16306978	2	21266953	0.4722	10.6752	0.03946	5.02e-25
Adolescence	rs62122515	2	21295227	A	G	0.357	cg03350299	2	21266960	0.45651	10.6703	0.00846	5.26e-25
Adolescence	rs62122516	2	21295439	T	A	0.357	cg03350299	2	21266960	0.45651	10.6703	0.00846	5.26e-25
Adolescence	rs1367113	2	21295832	A	G	0.357	cg03350299	2	21266960	0.45651	10.6703	0.00846	5.26e-25
Adolescence	rs312985	2	21378805	A	G	0.183	cg03350299	2	21266960	-0.56892	-10.6685	0.0111	5.35e-25
Adolescence	rs17399144	2	21305685	G	A	0.335	cg16306978	2	21266953	0.47023	10.6612	0.03966	5.73e-25
Adolescence	rs4665176	2	21305853	C	T	0.335	cg16306978	2	21266953	0.47023	10.6612	0.03966	5.73e-25
Adolescence	rs6761300	2	21306974	G	A	0.335	cg16306978	2	21266953	0.47023	10.6612	0.03966	5.73e-25
Adolescence	rs56212928	2	21272763	D	R	0.352	cg03350299	2	21266960	0.45725	10.6574	0.00843	5.94e-25
Adolescence	rs1652423	2	21383524	G	A	0.184	cg03350299	2	21266960	-0.56808	-10.6572	0.01111	5.95e-25
Adolescence	rs503105	2	21315664	C	T	0.18	cg25071744	2	21266995	-0.55419	-10.6532	0.03052	6.18e-25
Adolescence	rs10169543	2	21423989	C	T	0.182	cg16306978	2	21266953	-0.5722	-10.6494	0.04944	6.41e-25
Adolescence	rs34002646	2	21425323	G	A	0.182	cg16306978	2	21266953	-0.5722	-10.6494	0.04944	6.41e-25
Adolescence	rs12712940	2	21426743	A	C	0.182	cg16306978	2	21266953	-0.5722	-10.6494	0.04944	6.41e-25
Adolescence	rs1712248	2	21385778	C	G	0.186	cg16306978	2	21266953	-0.57512	-10.6456	0.05451	6.64e-25
Adolescence	rs56826296	2	21415728	G	T	0.182	cg16306978	2	21266953	-0.57201	-10.6453	0.04973	6.66e-25
Adolescence	rs569014	2	21415763	G	A	0.182	cg16306978	2	21266953	-0.57201	-10.6453	0.04973	6.66e-25
Adolescence	rs527259	2	21416019	G	C	0.182	cg16306978	2	21266953	-0.57201	-10.6453	0.04973	6.66e-25
Adolescence	rs202036472	2	21416347	D	R	0.182	cg16306978	2	21266953	-0.57201	-10.6453	0.04973	6.66e-25
Adolescence	rs539845	2	21416614	A	T	0.182	cg16306978	2	21266953	-0.57201	-10.6453	0.04973	6.66e-25
Adolescence	rs56350433	2	21298384	A	T	0.339	cg16306978	2	21266953	0.4697	10.6434	0.04023	6.78e-25
Adolescence	rs62122517	2	21298811	A	G	0.339	cg16306978	2	21266953	0.4697	10.6434	0.04023	6.78e-25
Adolescence	rs147360532	2	21299935	D	R	0.339	cg16306978	2	21266953	0.4697	10.6434	0.04023	6.78e-25
Adolescence	rs1429974	2	21300770	A	C	0.339	cg16306978	2	21266953	0.4697	10.6434	0.04023	6.78e-25
Adolescence	rs6708168	2	21301641	A	T	0.339	cg16306978	2	21266953	0.4697	10.6434	0.04023	6.78e-25
Adolescence	rs2195598	2	21303043	T	C	0.339	cg16306978	2	21266953	0.4697	10.6434	0.04023	6.78e-25
Adolescence	rs312970	2	21369815	A	T	0.182	cg03350299	2	21266960	-0.56753	-10.6323	0.01111	7.53e-25
Adolescence	rs312979	2	21377705	A	T	0.182	cg03350299	2	21266960	-0.56753	-10.6323	0.01111	7.53e-25
Adolescence	rs72336878	2	21377928	D	R	0.182	cg03350299	2	21266960	-0.56753	-10.6323	0.01111	7.53e-25
Adolescence	rs312981	2	21378151	G	A	0.182	cg03350299	2	21266960	-0.56753	-10.6323	0.01111	7.53e-25
Adolescence	rs312982	2	21378226	G	C	0.182	cg03350299	2	21266960	-0.56753	-10.6323	0.01111	7.53e-25
Adolescence	rs34908258	2	21378431	D	R	0.182	cg03350299	2	21266960	-0.56753	-10.6323	0.01111	7.53e-25
Adolescence	rs200200214	2	21378433	D	R	0.182	cg03350299	2	21266960	-0.56753	-10.6323	0.01111	7.53e-25
Adolescence	rs312983	2	21378580	A	C	0.182	cg03350299	2	21266960	-0.56753	-10.6323	0.01111	7.53e-25
Adolescence	rs312984	2	21378778	C	T	0.182	cg03350299	2	21266960	-0.56753	-10.6323	0.01111	7.53e-25
Adolescence	rs151224593	2	21379144	D	R	0.182	cg03350299	2	21266960	-0.56753	-10.6323	0.01111	7.53e-25
[truncated: 1,090 more rows]

## Sheet: LPAR5
Timepoint	SNP	SNP Chr	SNP Pos	A1	A2	MAF	CpG	CpG Chr	CpG Pos	beta	t-stat	Effect Size	p-value
Adolescence	rs11064296	12	6744829	C	G	0.182	cg18951718	12	6745343	0.60624	12.5878	0.07557	2.15e-33
Adolescence	rs55944427	12	6745315	T	C	0.181	cg25655096	12	6745292	0.43278	8.18482	0.02569	1.01e-15
Adolescence	rs1045553	12	6747295	G	A	0.218	cg18951718	12	6745343	0.52788	11.3689	0.06879	6.01e-28
Adolescence	rs12308613	12	6622901	T	C	0.291	cg18951718	12	6745343	0.23608	5.39547	0.02867	8.91e-08
Adolescence	rs1882553	12	6747578	G	C	0.217	cg25655096	12	6745292	0.38571	7.64852	0.02001	5.6e-14
Adolescence	rs917633	12	6611964	A	G	0.291	cg18951718	12	6745343	0.23888	5.4632	0.02841	6.17e-08
Adolescence	rs758739	12	6626369	G	C	0.3	cg18951718	12	6745343	0.26811	6.2261	0.03142	7.57e-10
Adolescence	rs1882553	12	6747578	G	C	0.217	cg18951718	12	6745343	0.52742	11.3521	0.06851	7.09e-28
Adolescence	rs73047897	12	6748460	T	C	0.158	cg25655096	12	6745292	0.40337	7.21944	0.02391	1.17e-12
Adolescence	rs142808708	12	6725536	D	R	0.344	cg18951718	12	6745343	0.24091	5.66332	0.02885	2.04e-08
Adolescence	rs12815135	12	6743518	C	T	0.189	cg18951718	12	6745343	0.5903	12.2732	0.07555	5.95e-32
Adolescence	rs11064306	12	6764030	C	A	0.35	cg18951718	12	6745343	0.26493	6.34735	0.0314	3.59e-10
Adolescence	rs11064296	12	6744829	C	G	0.182	cg25655096	12	6745292	0.43164	8.17072	0.02569	1.13e-15
Adolescence	rs740852	12	6650326	A	G	0.108	cg18951718	12	6745343	0.49831	7.72147	0.05028	3.29e-14
Adolescence	rs7975184	12	6627889	A	G	0.302	cg18951718	12	6745343	0.26667	6.18562	0.03125	9.68e-10
Adolescence	rs9706048	12	6625333	A	G	0.311	cg18951718	12	6745343	0.28016	6.61181	0.03187	6.77e-11
Adolescence	rs10735060	12	6656708	A	C	0.312	cg18951718	12	6745343	0.28489	6.64153	0.03211	5.59e-11
Adolescence	rs11064306	12	6764030	C	A	0.35	cg25655096	12	6745292	0.2825	6.48299	0.02254	1.54e-10
Adolescence	rs12815135	12	6743518	C	T	0.189	cg25655096	12	6745292	0.43863	8.36162	0.02578	2.58e-16
Adolescence	rs7964510	12	6787622	T	C	0.127	cg18951718	12	6745343	0.52616	9.07918	0.06688	7.74e-19
Adolescence	rs1045553	12	6747295	G	A	0.218	cg25655096	12	6745292	0.3837	7.6092	0.02021	7.44e-14
Adolescence	rs7964510	12	6787622	T	C	0.127	cg25655096	12	6745292	0.39753	6.41445	0.00604	2.36e-10
Adolescence	rs7959658	12	6754191	G	A	0.359	cg25655096	12	6745292	0.29188	6.73986	0.02304	2.95e-11
Adolescence	rs4764623	12	6744864	G	C	0.434	cg25655096	12	6745292	0.33917	8.1424	0.02114	1.41e-15
Adolescence	rs10735059	12	6625130	A	G	0.304	cg18951718	12	6745343	0.23912	5.54562	0.02602	3.93e-08
Adolescence	rs7311174	12	6635567	A	T	0.301	cg18951718	12	6745343	0.26727	6.2021	0.03134	8.76e-10
Adolescence	rs73047897	12	6748460	T	C	0.158	cg18951718	12	6745343	0.55305	10.702	0.08256	3.89e-25
Adolescence	rs10994656	10	62923027	G	C	0.026	cg18951718	12	6745343	-0.67935	-5.62207	0.07108	2.57e-08
Adolescence	rs7971237	12	6604076	A	G	0.291	cg18951718	12	6745343	0.23888	5.4632	0.02841	6.17e-08
Adolescence	rs6489719	12	6605383	A	G	0.291	cg18951718	12	6745343	0.23888	5.4632	0.02841	6.17e-08
Adolescence	rs1043262	12	6639088	A	G	0.301	cg18951718	12	6745343	0.26727	6.2021	0.03134	8.76e-10
Adolescence	rs61380726	12	6615012	I	R	0.291	cg18951718	12	6745343	0.23888	5.4632	0.02841	6.17e-08
Adolescence	rs6489720	12	6615681	A	G	0.291	cg18951718	12	6745343	0.23888	5.4632	0.02841	6.17e-08
Adolescence	rs4764603	12	6616223	G	A	0.291	cg18951718	12	6745343	0.23888	5.4632	0.02841	6.17e-08
Adolescence	rs10744709	12	6617351	T	C	0.291	cg18951718	12	6745343	0.23888	5.4632	0.02841	6.17e-08
Adolescence	rs10735058	12	6617372	T	C	0.291	cg18951718	12	6745343	0.23888	5.4632	0.02841	6.17e-08
Adolescence	rs56216299	12	6629359	T	A	0.315	cg18951718	12	6745343	0.27203	6.43557	0.03124	2.07e-10
Adolescence	rs714774	12	6619284	C	G	0.291	cg18951718	12	6745343	0.23888	5.4632	0.02841	6.17e-08
Adolescence	rs7358654	12	6620602	A	G	0.291	cg18951718	12	6745343	0.23888	5.4632	0.02841	6.17e-08
Adolescence	rs2079867	12	6622111	A	G	0.291	cg18951718	12	6745343	0.23888	5.4632	0.02841	6.17e-08
Adolescence	rs12369967	12	6627356	G	A	0.301	cg18951718	12	6745343	0.26727	6.2021	0.03134	8.76e-10
Adolescence	rs10774436	12	6629266	A	G	0.301	cg18951718	12	6745343	0.26727	6.2021	0.03134	8.76e-10
Adolescence	rs3835028	12	6630750	I	R	0.301	cg18951718	12	6745343	0.26727	6.2021	0.03134	8.76e-10
Adolescence	rs7342382	12	6631623	G	A	0.301	cg18951718	12	6745343	0.26727	6.2021	0.03134	8.76e-10
Adolescence	rs4764623	12	6744864	G	C	0.434	cg18951718	12	6745343	0.34339	8.65635	0.03605	2.49e-17
Adolescence	rs2072374	12	6637845	T	C	0.301	cg18951718	12	6745343	0.26727	6.2021	0.03134	8.76e-10
Adolescence	rs55944427	12	6745315	T	C	0.181	cg18951718	12	6745343	0.60182	12.4636	0.07552	8.02e-33
Adolescence	rs10744710	12	6617559	C	T	0.291	cg18951718	12	6745343	0.23888	5.4632	0.02841	6.17e-08
Adolescence	rs2079868	12	6622346	T	C	0.301	cg18951718	12	6745343	0.24556	5.71121	0.02912	1.56e-08
Adolescence	rs61919661	12	6746443	G	A	0.182	cg18951718	12	6745343	0.60919	12.6606	0.07557	9.88e-34
Adolescence	rs61919661	12	6746443	G	A	0.182	cg25655096	12	6745292	0.43254	8.18917	0.02569	9.82e-16
Adolescence	rs10437831	12	6620779	G	A	0.301	cg18951718	12	6745343	0.24556	5.71121	0.02912	1.56e-08
Adolescence	rs7358768	12	6620495	G	T	0.303	cg18951718	12	6745343	0.24287	5.65567	0.02996	2.13e-08
Adolescence	rs11064295	12	6743450	T	C	0.183	cg18951718	12	6745343	0.60611	12.5921	0.07537	2.05e-33
Adolescence	rs147541758	12	6657460	D	R	0.034	cg18951718	12	6745343	0.61697	5.51471	0	4.66e-08
Adolescence	rs11064295	12	6743450	T	C	0.183	cg25655096	12	6745292	0.43788	8.30304	0.02566	4.07e-16
Adolescence	rs7959658	12	6754191	G	A	0.359	cg18951718	12	6745343	0.27577	6.65043	0.02733	5.28e-11
Adolescence	rs4376959	12	6741816	C	T	0.052	cg18951718	12	6745343	0.60853	6.8003	0.09493	1.99e-11
Adolescence	rs4764605	12	6623389	T	C	0.301	cg18951718	12	6745343	0.24556	5.71121	0.02912	1.56e-08
