# Supplementary material for: Genome-Wide DNA Methylation Patterns in Persistent Attention-Deficit/Hyperactivity Disorder and in Association With Impulsive and Callous Traits
Source: Front Genet. 2020 Jan 31;11:16. doi: 10.3389/fgene.2020.00016 (PMC7005250; doi:10.3389/fgene.2020.00016)
Supplement: Supplementary file 3 [file Table_5.xlsx]

## Sheet: Sheet1
		PAX5	TP53	E2F1	GTF2I	STAT4	IRF1	NR3C1	XBP1
Remitter vs Persistent	APOB	0.3006715	0.06660437	0.02923042	-	-	-	-	-
	NCKAP5	-	-	-	0.6211518	-0.2367408	0.3027578	-	-
	APOB	0.3006715	0.06660437	0.02923042	-	-	-	-	-
	RP11-525K10.1	-	-	-	-	-	-	-	-
	APOB	-	-	-	-	-	-	0.03140286	0.1589242
		NFAT1	NFkB	RELA	TFAP2A	T3RB1	AHR	ARNT	PAX5	TP53	RARB	FOXP3	HIF1	ETS1
Control vs Persister	SMIM2-AS1	-	-	-	-0.001014168	-	0.166144	0.3393517	-	-	-	-	-	-
	JAK2 (>4970 bp)	-	-	-	-	-	-	-	-	-	-	-	-	-
	SMOC2	-	-	-	-	-	-	-	-	-	-	-	-	-
	BREA2	-	-	-	-	-	-	-	-	-	-	-	-	-
	ANLN	-	-	-	-	-	-	-	-	-	-	0.1886232	-	-
	ACOXL	-	-	-	-	-	-	-	-	-	-	-	-	0.1269326
	AGMO	-	-	0.09162335	-	-	-	-	-	-	-	-	-	-
		-	-	-	-	-	-	-	-	-	-	-	-	-
Aggression		GTF2I	ETS1	ELK1	TFAP2A	CTF	RARB
	SEC14L1	0.4820167	0.2781784	0.03827042	0.08551338	-	-
	XRCC3	-	-	-	-	-0.04401471	-0.07569066
	CSNK1E	-	-	-	-	-	-
	ZNF597 (<8273 bp)	-	-	-	0.09516225	-	-
	RP11-1036E20.9 (<1378 bp)	-	-	-	-	-	-
	RP11-165H23.1(<11902 bp)	-	-	-	-	-	-
		TFAP2A	GTF2I	STAT4	ETS1	E2F1	AR	PAX5	TP53	SP1	MAZ	ETF	MYC	USF1	NR3C1	ATF1	AHR	ARNT
Impulsivity	FERMT1 (<643 bp)	0.01857638	0.4912944	-0.1641464	0.3735089	-	-	-	-	-	-	-	-	-	-	-	-	-
	TBC1D28	-	-	-	-	0.2135975	-	-	-	-	-	-	-	-	-	-	-	-
	KCNK16	-	-	-	-	-	-	-	-	-	-	-	-	-	-	-	-	-
	FARP1	-	-	-	-	-	-	-	-	-	-	-	-	-	-	-	-	-
	MRRF	0.08654858	-	-	-	-	-	-	-	-	-	-	-	-	-	-	-	-
	PDE4D	-	-0.005613027	-	-	-	-0.2099822	-	-	-	-	-	-	-	-	-	-	-
	LY6G6E	-	-	-	-	-0.1973166	-	0.1364676	0.07006928	0.134519	-0.1599451	-0.1282604	-	-	-	-	-	-
	CCR3 (<10405 bp)	-	-	-	-	-	-	-	-	-	-	-	0.04071879	-0.02260826	-	-	-	-
	PLCL2	-	-	-	-	-	-	-	-	-	-	-	-	-	0.1027294	-	-	-
	MAD1L1	-	-	-	-	-	-	-	-	-	-	-	-	-	-	0.3170989	0.2239074	0.2254929
	PLVAP	-	-	-	-	-	-	-	-	-	-	-	-	-	-	-	-	-
	TMEM9	-	-	-	-	0.3819316	-	-	-	-	-	-	-	-	-	-	-	-
