# Supplementary material for: Genome-Wide DNA Methylation Patterns in Persistent Attention-Deficit/Hyperactivity Disorder and in Association With Impulsive and Callous Traits
Source: Front Genet. 2020 Jan 31;11:16. doi: 10.3389/fgene.2020.00016 (PMC7005250; doi:10.3389/fgene.2020.00016)
Supplement: Supplementary file 4 [file Table_6.xlsx]

## Sheet: Correlation bloodbrain 450K
Trait	CpG site	Gene	PFC	Entorhinal cortex	STG	Cerebellum
Persistent / Remittent	cg03350299	APOB	0.174 (0.138)	0.267 (0.0246)	0.251 (0.0299)	0.188 (0.117)			Pearson's correlation between blood and brain
	cg03438637	NCKAP5	-	-	-	-			PFC	Prefrontal cortex
	cg24309555	APOB	0.15 (0.203)	0.348 (0.00292)	0.193 (0.0966)	0.205 (0.08567)			STG	Superior temporal gyrus
	cg01033642	RP11-525K10.1	0.0253 (0.83)	0.161 (0.179)	0.134 (0.253)	-0.172 (0.152)
	cg16723488	APOB	0.188 (0.109)	0.486 (1.73*10-5)	0.259 (0.0247)	0.258 (0.0301)			Green cells indicate significant correlation patterns
Control / Persister	cg19190762	SMIM2-AS1	0.161 (0.171)	0.00412 (0.973)	0.177 (0.129)	0.198 (0.0974)			Pearson's r (p-value)
	cg02448002	JAK2 (>4970 bp)	-	-	-	-
	cg18005896	SMOC2	0.732 (1.33*10-13)	0.774 (2.45*10-15)	0.654 (2*10-10)	0.771 (3.93*10-15)
	cg10136166	BREA2	0.497 (6.51*10-6)	0.455 (6.75*10-5)	0.474 (1.71*10-5)	0.523 (2.9*10-6)
	cg10811195	ANLN	-	-	-	-
	cg19992207	ACOXL	0.484 (1.28*10-5)	0.172 (0.152)	0.24 (0.0384)	0.0419 (0.729)
	cg24142353	AGMO	-	-	-	-
Remitter + Persister / Control	cg02448002	JAK2 (>4970 bp)	-	-	-	-
	cg10335011	RP11-462L8.1	-	-	-	-
	cg00146027	RP11-462L8.1	0.31 (0.00725)	0.34 (0.00368)	0.173 (0.139)	-0.105 (0.382)
	cg07506081	TBC1D16	0.401 (0.000393)	0.444 (0.000107)	0.391 (0.000517)	0.406 (0.000436)
	cg00756338	ZDHHC14	0.583 (4.92*10-8)	0.579 (1.19*10-7)	0.631 (1.26*10-9)	0.512 (4.92*10-6)
	cg10275340	USP14	-	-	-	-
	cg13175003	SLIT3 (<15313 bp)	-	-	-	-
Pesister / Control + Remitter	cg12760573	KCNK17	0.119 (0.312)	0.0863 (0.474)	-0.0175 (0.882)	-0.00233 (0.985)
	cg02914029	TGFB1 (<29099 bp)	-	-	-	-
	cg24116380	CCDC112(<159137 bp)	-0.0123 (0.917)	0.12 (0.319)	-0.203 (0.0807)	-0.144 (0.23)
	cg05333436	TANGO2	-	-	-	-
Aggression	cg03758477	SEC14L1	0.377 (0.000946)	0.432 (0.000168)	0.338 (0.003)	0.544 (9.44*10-7)
	cg19958417	XRCC3	-	-	-	-
	cg14146711	CSNK1E	-	-	-	-
	cg05007325	ZNF597 (<8273 bp)	0.215 (0.0661)	0.268 (0.0239)	0.31 (0.00682)	0.172 (0.153)
	cg12365603	RP11-1036E20.9 (<1378 bp)	-	-	-	-
	cg02896594	RP11-165H23.1(<11902 bp)	-	-	-	-
Impulsivity	cg07402156	FERMT1 (<643 bp)	-	-	-	-
	cg22157628	TBC1D28	-0.0996 (0.398)	0.0317 (0.793)	0.00827 (0.944)	0.114 (0.343)
	cg22971038	KCNK16	0.0333 (0.778)	0.184 (0.124)	0.13 (0.268)	0.136 (0.258)
	cg02183491	FARP1	0.0879 (0.456)	0.177 (0.14)	-0.174 (0.134)	0.135 (0.262)
	cg10654292	MRRF	-	-	-	-
	cg13894081	PDE4D	-	-	-	-
	cg20930398	LY6G6E	-	-	-	-
	cg06908065	CCR3 (<10405 bp)	-	-	-	-
	cg02595497	PLCL2	-	-	-	-
	cg11457582	MAD1L1	0.108 (0.361)	-0.109 (0.365)	-0.118 (0.312)	-0.145 (0.227)
	cg01980298	PLVAP	-	-	-	-
	cg17771466	TMEM9	-	-	-	-
