# Supplementary material for: Genome-Wide DNA Methylation Patterns in Persistent Attention-Deficit/Hyperactivity Disorder and in Association With Impulsive and Callous Traits
Source: Front Genet. 2020 Jan 31;11:16. doi: 10.3389/fgene.2020.00016 (PMC7005250; doi:10.3389/fgene.2020.00016)
Supplement: Supplementary file 5 [file Table_7.xlsx]

## Sheet: GO remittent - persistent
	Term	Class	N genes in GO term	N genes p < 10-3 in GO term	p-value	FDR-adjusted p-value
GO:0000055	ribosomal large subunit export from nucleus	Biological process	9	3	0.00065326	1
GO:0030029	actin filament-based process	Biological process	681	37	0.000991263	1
GO:0005938	cell cortex	Cellulair comparment	246	18	0.00149187	1
GO:0071600	otic vesicle morphogenesis	Biological process	10	3	0.00152032	1
GO:0030687	preribosome, large subunit precursor	Cellulair comparment	24	4	0.00152058	1
GO:0007605	sensory perception of sound	Biological process	143	12	0.00228838	1
GO:0000054	ribosomal subunit export from nucleus	Biological process	14	3	0.00229848	1
GO:0033750	ribosome localization	Biological process	14	3	0.00229848	1
GO:2000587	negative regulation of platelet-derived growth factor receptor-beta signaling pathway	Biological process	8	3	0.00239976	1
GO:0016442	RISC complex	Cellulair comparment	10	3	0.00254084	1
GO:0034612	response to tumor necrosis factor	Biological process	294	15	0.00256514	1
GO:0016323	basolateral plasma membrane	Cellulair comparment	207	14	0.00329021	1
GO:0090084	negative regulation of inclusion body assembly	Biological process	11	3	0.0036178	1
GO:0071379	cellular response to prostaglandin stimulus	Biological process	22	4	0.00362495	1
GO:0071428	rRNA-containing ribonucleoprotein complex export from nucleus	Biological process	16	3	0.0036563	1
GO:0031332	RNAi effector complex	Cellulair comparment	11	3	0.0039276	1
GO:0030684	preribosome	Cellulair comparment	74	6	0.00437231	1
GO:0008622	epsilon DNA polymerase complex	Cellulair comparment	5	2	0.00455295	1
GO:0097553	calcium ion transmembrane import into cytosol	Biological process	128	10	0.00462062	1
GO:0046890	regulation of lipid biosynthetic process	Biological process	167	11	0.00469306	1
GO:0008376	acetylgalactosaminyltransferase activity	Molecular function	34	5	0.00490573	1
GO:0097116	gephyrin clustering involved in postsynaptic density assembly	Biological process	3	2	0.00530589	1
GO:0050954	sensory perception of mechanical stimulus	Biological process	160	12	0.00532002	1
GO:2000586	regulation of platelet-derived growth factor receptor-beta signaling pathway	Biological process	10	3	0.00568258	1
GO:0051208	sequestering of calcium ion	Biological process	116	9	0.00571854	1
GO:0005523	tropomyosin binding	Molecular function	14	3	0.00598868	1
GO:0070161	anchoring junction	Cellulair comparment	523	28	0.00657165	1
GO:0044091	membrane biogenesis	Biological process	34	5	0.00662818	1
GO:0033209	tumor necrosis factor-mediated signaling pathway	Biological process	169	10	0.0066463	1
GO:0044766	multi-organism transport	Biological process	74	6	0.00685075	1
GO:1902579	multi-organism localization	Biological process	74	6	0.00685075	1
GO:0003779	actin binding	Molecular function	399	23	0.00721219	1
GO:0090244	Wnt signaling pathway involved in somitogenesis	Biological process	4	2	0.00723861	1
GO:0051179	localization	Biological process	6254	187	0.00735674	1
GO:0016324	apical plasma membrane	Cellulair comparment	291	16	0.00746011	1
GO:0019783	ubiquitin-like protein-specific protease activity	Molecular function	110	8	0.00746027	1
GO:0032184	SUMO polymer binding	Molecular function	5	2	0.00759037	1
GO:0030240	skeletal muscle thin filament assembly	Biological process	6	2	0.00800909	1
GO:0035473	lipase binding	Molecular function	6	2	0.00809878	1
GO:0051235	maintenance of location	Biological process	299	16	0.00812157	1
GO:0030036	actin cytoskeleton organization	Biological process	589	30	0.0081369	1
GO:0034694	response to prostaglandin	Biological process	31	4	0.00819187	1
GO:0032045	guanyl-nucleotide exchange factor complex	Cellulair comparment	13	3	0.00831383	1
GO:0005912	adherens junction	Cellulair comparment	505	27	0.00847643	1
GO:0071356	cellular response to tumor necrosis factor	Biological process	276	13	0.00885742	1
GO:0050839	cell adhesion molecule binding	Molecular function	463	24	0.00910957	1
GO:0071599	otic vesicle development	Biological process	15	3	0.00917793	1
GO:0098657	import into cell	Biological process	689	31	0.00930067	1
GO:0001508	action potential	Biological process	140	10	0.00950548	1
GO:1902965	regulation of protein localization to early endosome	Biological process	5	2	0.009528	1
GO:1902966	positive regulation of protein localization to early endosome	Biological process	5	2	0.009528	1
GO:0044257	cellular protein catabolic process	Biological process	697	29	0.00958415	1
GO:0032391	photoreceptor connecting cilium	Cellulair comparment	31	4	0.00964864	1
GO:1902947	regulation of tau-protein kinase activity	Biological process	6	2	0.00967956	1
GO:2000095	regulation of Wnt signaling pathway, planar cell polarity pathway	Biological process	13	3	0.00986009	1
GO:0044464	cell part	Cellulair comparment	16037	405	0.0100384	1
GO:0051694	pointed-end actin filament capping	Biological process	7	2	0.010306	1
GO:1901843	positive regulation of high voltage-gated calcium channel activity	Biological process	4	2	0.0103258	1
GO:0008234	cysteine-type peptidase activity	Molecular function	175	10	0.0105474	1
GO:0060402	calcium ion transport into cytosol	Biological process	145	10	0.0106093	1
GO:0090083	regulation of inclusion body assembly	Biological process	16	3	0.0110121	1
GO:0035987	endodermal cell differentiation	Biological process	46	5	0.0111836	1
GO:2000052	positive regulation of non-canonical Wnt signaling pathway	Biological process	12	3	0.0113314	1
GO:0005623	cell	Cellulair comparment	16068	405	0.0114944	1
GO:0044539	long-chain fatty acid import	Biological process	7	2	0.0115535	1
GO:0060386	synapse assembly involved in innervation	Biological process	1	1	0.011693	1
GO:0046794	transport of virus	Biological process	61	5	0.012118	1
GO:1904956	regulation of midbrain dopaminergic neuron differentiation	Biological process	5	2	0.0121553	1
GO:0015166	polyol transmembrane transporter activity	Molecular function	9	2	0.0122884	1
GO:0015665	alcohol transmembrane transporter activity	Molecular function	9	2	0.0122884	1
GO:2000601	positive regulation of Arp2/3 complex-mediated actin nucleation	Biological process	7	2	0.0124197	1
GO:0071944	cell periphery	Cellulair comparment	5156	153	0.0124663	1
GO:0032496	response to lipopolysaccharide	Biological process	314	14	0.0127545	1
GO:0071398	cellular response to fatty acid	Biological process	55	5	0.0129689	1
GO:0033227	dsRNA transport	Biological process	5	2	0.0129909	1
GO:0099568	cytoplasmic region	Cellulair comparment	308	18	0.0130269	1
GO:1903321	negative regulation of protein modification by small protein conjugation or removal	Biological process	149	9	0.0135582	1
GO:0010642	negative regulation of platelet-derived growth factor receptor signaling pathway	Biological process	16	3	0.0135855	1
GO:0086003	cardiac muscle cell contraction	Biological process	63	6	0.0136217	1
GO:0035791	platelet-derived growth factor receptor-beta signaling pathway	Biological process	13	3	0.0136587	1
GO:0005778	peroxisomal membrane	Cellulair comparment	58	5	0.0137484	1
GO:0031903	microbody membrane	Cellulair comparment	58	5	0.0137484	1
GO:0031257	cell trailing edge membrane	Cellulair comparment	1	1	0.0139572	1
GO:0031259	uropod membrane	Cellulair comparment	1	1	0.0139572	1
GO:0007015	actin filament organization	Biological process	348	19	0.0140069	1
GO:0030163	protein catabolic process	Biological process	842	33	0.0141743	1
GO:0001772	immunological synapse	Cellulair comparment	33	4	0.0144144	1
GO:0051209	release of sequestered calcium ion into cytosol	Biological process	112	8	0.0147077	1
GO:0051283	negative regulation of sequestering of calcium ion	Biological process	112	8	0.0147077	1
GO:0030864	cortical actin cytoskeleton	Cellulair comparment	59	6	0.0148712	1
GO:0042164	interleukin-12 alpha subunit binding	Molecular function	1	1	0.0149302	1
GO:0030916	otic vesicle formation	Biological process	8	2	0.0150294	1
GO:0001792	polymeric immunoglobulin receptor activity	Molecular function	1	1	0.0150535	1
GO:0051282	regulation of sequestering of calcium ion	Biological process	113	8	0.015166	1
GO:0005925	focal adhesion	Cellulair comparment	393	21	0.0152984	1
GO:0097118	neuroligin clustering involved in postsynaptic membrane assembly	Biological process	4	2	0.0154626	1
GO:0009646	response to absence of light	Biological process	1	1	0.0156138	1
GO:0071485	cellular response to absence of light	Biological process	1	1	0.0156138	1
GO:1990603	dark adaptation	Biological process	1	1	0.0156138	1
GO:0031380	nuclear RNA-directed RNA polymerase complex	Cellulair comparment	1	1	0.0156138	1
GO:0035869	ciliary transition zone	Cellulair comparment	55	5	0.0157267	1
GO:0004733	pyridoxamine-phosphate oxidase activity	Molecular function	1	1	0.0159098	1
GO:2000401	regulation of lymphocyte migration	Biological process	45	4	0.0159339	1
GO:0005924	cell-substrate adherens junction	Cellulair comparment	396	21	0.0159424	1
GO:0018995	host	Cellulair comparment	68	5	0.0159987	1
GO:0043657	host cell	Cellulair comparment	68	5	0.0159987	1
GO:0001547	antral ovarian follicle growth	Biological process	6	2	0.0160075	1
GO:0102389	polyprenol reductase activity	Molecular function	1	1	0.0160756	1
GO:0036459	thiol-dependent ubiquitinyl hydrolase activity	Molecular function	101	7	0.0160991	1
GO:0044265	cellular macromolecule catabolic process	Biological process	1053	38	0.0161248	1
GO:0070542	response to fatty acid	Biological process	83	6	0.0162315	1
GO:0098914	membrane repolarization during atrial cardiac muscle cell action potential	Biological process	7	2	0.016344	1
GO:0008591	regulation of Wnt signaling pathway, calcium modulating pathway	Biological process	1	1	0.0164375	1
GO:0045813	positive regulation of Wnt signaling pathway, calcium modulating pathway	Biological process	1	1	0.0164375	1
GO:0098883	synapse disassembly	Biological process	1	1	0.0164375	1
GO:1901296	negative regulation of canonical Wnt signaling pathway involved in cardiac muscle cell fate commitment	Biological process	1	1	0.0164375	1
GO:1904701	Wnt-Frizzled-LRP5/6 complex assembly	Biological process	1	1	0.0164375	1
GO:1904711	regulation of Wnt-Frizzled-LRP5/6 complex assembly	Biological process	1	1	0.0164375	1
GO:1904723	negative regulation of Wnt-Frizzled-LRP5/6 complex assembly	Biological process	1	1	0.0164375	1
GO:1905067	negative regulation of canonical Wnt signaling pathway involved in heart development	Biological process	1	1	0.0164375	1
GO:0060401	cytosolic calcium ion transport	Biological process	156	10	0.0164573	1
GO:0060526	prostate glandular acinus morphogenesis	Biological process	6	2	0.0165196	1
GO:0060527	prostate epithelial cord arborization involved in prostate glandular acinus morphogenesis	Biological process	6	2	0.0165196	1
GO:0000027	ribosomal large subunit assembly	Biological process	29	3	0.0167848	1
GO:0015791	polyol transport	Biological process	11	2	0.0168596	1
GO:1990868	response to chemokine	Biological process	6	2	0.0171684	1
GO:1990869	cellular response to chemokine	Biological process	6	2	0.0171684	1
GO:0101005	ubiquitinyl hydrolase activity	Molecular function	102	7	0.0172286	1
GO:0004978	corticotropin receptor activity	Molecular function	1	1	0.0172557	1
GO:0071380	cellular response to prostaglandin E stimulus	Biological process	17	3	0.0173847	1
GO:0000768	syncytium formation by plasma membrane fusion	Biological process	51	5	0.0174616	1
GO:0071222	cellular response to lipopolysaccharide	Biological process	164	9	0.0175199	1
GO:0036010	protein localization to endosome	Biological process	17	3	0.0175643	1
GO:0010501	RNA secondary structure unwinding	Biological process	46	4	0.0176077	1
GO:1903320	regulation of protein modification by small protein conjugation or removal	Biological process	287	14	0.0177026	1
GO:0034370	triglyceride-rich lipoprotein particle remodeling	Biological process	13	2	0.0179236	1
GO:0002237	response to molecule of bacterial origin	Biological process	331	14	0.0179306	1
GO:0097107	postsynaptic density assembly	Biological process	5	2	0.0179466	1
GO:0098698	postsynaptic specialization assembly	Biological process	5	2	0.0179466	1
GO:0070588	calcium ion transmembrane transport	Biological process	303	16	0.0179508	1
GO:2000402	negative regulation of lymphocyte migration	Biological process	9	2	0.0183923	1
GO:0006949	syncytium formation	Biological process	53	5	0.018609	1
GO:0030055	cell-substrate junction	Cellulair comparment	401	21	0.0187745	1
GO:1905666	regulation of protein localization to endosome	Biological process	8	2	0.0187833	1
GO:1905668	positive regulation of protein localization to endosome	Biological process	8	2	0.0187833	1
GO:0004607	phosphatidylcholine-sterol O-acyltransferase activity	Molecular function	1	1	0.0188521	1
GO:0044215	other organism	Cellulair comparment	74	5	0.0189463	1
GO:0044216	other organism cell	Cellulair comparment	74	5	0.0189463	1
GO:0044217	other organism part	Cellulair comparment	74	5	0.0189463	1
GO:0097435	supramolecular fiber organization	Biological process	571	26	0.0193355	1
GO:2000287	positive regulation of myotome development	Biological process	1	1	0.0194079	1
GO:2000290	regulation of myotome development	Biological process	1	1	0.0194079	1
GO:0051704	multi-organism process	Biological process	2359	69	0.0194596	1
GO:0010810	regulation of cell-substrate adhesion	Biological process	189	12	0.0194789	1
GO:0030048	actin filament-based movement	Biological process	130	9	0.0194881	1
GO:0001706	endoderm formation	Biological process	55	5	0.0195935	1
GO:0043231	intracellular membrane-bounded organelle	Cellulair comparment	10404	278	0.0196128	1
GO:0021684	cerebellar granular layer formation	Biological process	6	2	0.0197682	1
GO:0021707	cerebellar granule cell differentiation	Biological process	6	2	0.0197682	1
GO:0021942	radial glia guided migration of Purkinje cell	Biological process	5	2	0.0198735	1
GO:0034377	plasma lipoprotein particle assembly	Biological process	28	3	0.0198877	1
GO:0042255	ribosome assembly	Biological process	60	4	0.0201052	1
GO:0006810	transport	Biological process	4947	146	0.0201669	1
GO:0070743	interleukin-23 complex	Cellulair comparment	2	1	0.0206138	1
GO:0045519	interleukin-23 receptor binding	Molecular function	2	1	0.0206138	1
GO:1903280	negative regulation of calcium:sodium antiporter activity	Biological process	1	1	0.0208557	1
GO:0001046	core promoter sequence-specific DNA binding	Molecular function	112	8	0.0210881	1
GO:0002076	osteoblast development	Biological process	17	3	0.0212163	1
GO:0045988	negative regulation of striated muscle contraction	Biological process	9	2	0.0213273	1
GO:0044438	microbody part	Cellulair comparment	92	6	0.0213992	1
GO:0044439	peroxisomal part	Cellulair comparment	92	6	0.0213992	1
GO:0045899	positive regulation of RNA polymerase II transcriptional preinitiation complex assembly	Biological process	11	2	0.0214528	1
GO:0071219	cellular response to molecule of bacterial origin	Biological process	172	9	0.0216256	1
GO:0006816	calcium ion transport	Biological process	406	19	0.0217547	1
GO:0023052	signaling	Biological process	6268	181	0.0218516	1
GO:0034379	very-low-density lipoprotein particle assembly	Biological process	11	2	0.0219633	1
GO:0002827	positive regulation of T-helper 1 type immune response	Biological process	15	2	0.0220559	1
GO:0006897	endocytosis	Biological process	628	27	0.0222343	1
GO:0070863	positive regulation of protein exit from endoplasmic reticulum	Biological process	10	2	0.0223608	1
GO:0008097	5S rRNA binding	Molecular function	11	2	0.0224549	1
GO:0008237	metallopeptidase activity	Molecular function	185	10	0.022851	1
GO:0072676	lymphocyte migration	Biological process	88	5	0.0228541	1
GO:0030863	cortical cytoskeleton	Cellulair comparment	85	7	0.0228739	1
GO:0014866	skeletal myofibril assembly	Biological process	8	2	0.0229283	1
GO:0045177	apical part of cell	Cellulair comparment	361	17	0.0229707	1
GO:0060143	positive regulation of syncytium formation by plasma membrane fusion	Biological process	25	3	0.0230422	1
GO:0016576	histone dephosphorylation	Biological process	6	2	0.0231186	1
GO:1901387	positive regulation of voltage-gated calcium channel activity	Biological process	8	2	0.0231506	1
GO:0086002	cardiac muscle cell action potential involved in contraction	Biological process	53	5	0.0232155	1
GO:0032102	negative regulation of response to external stimulus	Biological process	282	13	0.0232694	1
GO:0033385	geranylgeranyl diphosphate metabolic process	Biological process	1	1	0.0234567	1
GO:0033386	geranylgeranyl diphosphate biosynthetic process	Biological process	1	1	0.0234567	1
GO:0086014	atrial cardiac muscle cell action potential	Biological process	20	3	0.0236402	1
GO:0086026	atrial cardiac muscle cell to AV node cell signaling	Biological process	20	3	0.0236402	1
GO:0086066	atrial cardiac muscle cell to AV node cell communication	Biological process	20	3	0.0236402	1
GO:0019060	intracellular transport of viral protein in host cell	Biological process	2	1	0.0237852	1
GO:0030581	symbiont intracellular protein transport in host	Biological process	2	1	0.0237852	1
GO:0051708	intracellular protein transport in other organism involved in symbiotic interaction	Biological process	2	1	0.0237852	1
GO:0002276	basophil activation involved in immune response	Biological process	1	1	0.0238829	1
GO:0006430	lysyl-tRNA aminoacylation	Biological process	1	1	0.0238829	1
GO:0003877	ATP adenylyltransferase activity	Molecular function	1	1	0.0238829	1
GO:0004824	lysine-tRNA ligase activity	Molecular function	1	1	0.0238829	1
GO:0001952	regulation of cell-matrix adhesion	Biological process	103	8	0.0239496	1
GO:0044877	macromolecular complex binding	Molecular function	983	38	0.024043	1
GO:0036494	positive regulation of translation initiation in response to endoplasmic reticulum stress	Biological process	1	1	0.0240882	1
GO:0086001	cardiac muscle cell action potential	Biological process	71	6	0.0242171	1
GO:0071709	membrane assembly	Biological process	29	4	0.0243045	1
GO:0009057	macromolecule catabolic process	Biological process	1280	44	0.0244704	1
GO:0019433	triglyceride catabolic process	Biological process	33	3	0.0248237	1
GO:0051234	establishment of localization	Biological process	5048	148	0.0248405	1
GO:0090527	actin filament reorganization	Biological process	7	2	0.0249329	1
GO:0072671	mitochondria-associated ubiquitin-dependent protein catabolic process	Biological process	1	1	0.0250344	1
GO:0036266	Cdc48p-Npl4p-Vms1p AAA ATPase complex	Cellulair comparment	1	1	0.0250344	1
GO:1902946	protein localization to early endosome	Biological process	7	2	0.025159	1
GO:0032059	bleb	Cellulair comparment	8	2	0.0253199	1
GO:0097109	neuroligin family protein binding	Molecular function	5	2	0.0253363	1
GO:0016925	protein sumoylation	Biological process	92	6	0.0257729	1
GO:0031597	cytosolic proteasome complex	Cellulair comparment	12	2	0.0258421	1
GO:0102391	decanoate--CoA ligase activity	Molecular function	8	2	0.0260977	1
GO:0005886	plasma membrane	Cellulair comparment	5056	147	0.0261148	1
GO:0086065	cell communication involved in cardiac conduction	Biological process	55	5	0.0261891	1
GO:0070841	inclusion body assembly	Biological process	22	3	0.026288	1
GO:0043227	membrane-bounded organelle	Cellulair comparment	12092	316	0.0268931	1
GO:0051155	positive regulation of striated muscle cell differentiation	Biological process	70	5	0.0270595	1
GO:0043226	organelle	Cellulair comparment	13046	340	0.0274758	1
GO:0007154	cell communication	Biological process	6288	180	0.0276262	1
GO:0045575	basophil activation	Biological process	2	1	0.0276348	1
GO:0031996	thioesterase binding	Molecular function	11	2	0.0278025	1
GO:0008584	male gonad development	Biological process	136	8	0.0278798	1
GO:0031397	negative regulation of protein ubiquitination	Biological process	139	8	0.0281122	1
GO:0045081	negative regulation of interleukin-10 biosynthetic process	Biological process	1	1	0.0281972	1
GO:0007492	endoderm development	Biological process	79	6	0.0282163	1
GO:0070104	negative regulation of interleukin-6-mediated signaling pathway	Biological process	1	1	0.0285065	1
GO:1902205	regulation of interleukin-2-mediated signaling pathway	Biological process	1	1	0.0285065	1
GO:1902206	negative regulation of interleukin-2-mediated signaling pathway	Biological process	1	1	0.0285065	1
GO:1902215	negative regulation of interleukin-4-mediated signaling pathway	Biological process	1	1	0.0285065	1
GO:1902233	negative regulation of positive thymic T cell selection	Biological process	1	1	0.0285065	1
GO:0043514	interleukin-12 complex	Cellulair comparment	2	1	0.0286593	1
GO:0019972	interleukin-12 binding	Molecular function	2	1	0.0286593	1
GO:0005496	steroid binding	Molecular function	92	6	0.0288554	1
GO:0042472	inner ear morphogenesis	Biological process	95	7	0.0289182	1
GO:0051932	synaptic transmission, GABAergic	Biological process	38	4	0.0289274	1
GO:0060142	regulation of syncytium formation by plasma membrane fusion	Biological process	27	3	0.0289638	1
GO:1904377	positive regulation of protein localization to cell periphery	Biological process	54	5	0.0290064	1
GO:0060765	regulation of androgen receptor signaling pathway	Biological process	26	3	0.0290161	1
GO:0071625	vocalization behavior	Biological process	19	3	0.0292513	1
GO:0090081	regulation of heart induction by regulation of canonical Wnt signaling pathway	Biological process	2	1	0.0293086	1
GO:0090082	positive regulation of heart induction by negative regulation of canonical Wnt signaling pathway	Biological process	2	1	0.0293086	1
GO:1901321	positive regulation of heart induction	Biological process	2	1	0.0293086	1
GO:0034359	mature chylomicron	Cellulair comparment	1	1	0.0294589	1
GO:0034360	chylomicron remnant	Cellulair comparment	1	1	0.0294589	1
GO:0008614	pyridoxine metabolic process	Biological process	2	1	0.0295706	1
GO:0008615	pyridoxine biosynthetic process	Biological process	2	1	0.0295706	1
GO:0034695	response to prostaglandin E	Biological process	24	3	0.0296068	1
GO:0046546	development of primary male sexual characteristics	Biological process	137	8	0.0300391	1
GO:0003165	Purkinje myocyte development	Biological process	2	1	0.0301849	1
GO:0044448	cell cortex part	Cellulair comparment	133	9	0.0302893	1
GO:0000921	septin ring assembly	Biological process	1	1	0.0308289	1
GO:0031106	septin ring organization	Biological process	1	1	0.0308289	1
GO:0033523	histone H2B ubiquitination	Biological process	11	2	0.0308664	1
GO:0004653	polypeptide N-acetylgalactosaminyltransferase activity	Molecular function	19	3	0.0310978	1
GO:1902282	voltage-gated potassium channel activity involved in ventricular cardiac muscle cell action potential repolarization	Molecular function	8	2	0.0313266	1
GO:0021683	cerebellar granular layer morphogenesis	Biological process	8	2	0.0314209	1
GO:0061337	cardiac conduction	Biological process	143	9	0.0315266	1
GO:0034362	low-density lipoprotein particle	Cellulair comparment	14	2	0.0316653	1
GO:0086013	membrane repolarization during cardiac muscle cell action potential	Biological process	26	3	0.0317168	1
GO:0060687	regulation of branching involved in prostate gland morphogenesis	Biological process	7	2	0.0317849	1
GO:0005575	cellular_component	Cellulair comparment	17790	429	0.0320286	1
GO:0070011	peptidase activity, acting on L-amino acid peptides	Molecular function	584	21	0.0320915	1
GO:0050796	regulation of insulin secretion	Biological process	171	10	0.032219	1
GO:0021587	cerebellum morphogenesis	Biological process	36	4	0.0325019	1
GO:0098644	complex of collagen trimers	Cellulair comparment	20	3	0.0325633	1
GO:0042995	cell projection	Cellulair comparment	1916	71	0.0329526	1
GO:2001247	positive regulation of phosphatidylcholine biosynthetic process	Biological process	1	1	0.0330203	1
GO:1901978	positive regulation of cell cycle checkpoint	Biological process	10	2	0.0330306	1
GO:0086091	regulation of heart rate by cardiac conduction	Biological process	36	4	0.0331694	1
GO:2001160	regulation of histone H3-K79 methylation	Biological process	2	1	0.0334182	1
GO:2001162	positive regulation of histone H3-K79 methylation	Biological process	2	1	0.0334182	1
GO:0004906	interferon-gamma receptor activity	Molecular function	2	1	0.033635	1
GO:0010640	regulation of platelet-derived growth factor receptor signaling pathway	Biological process	22	3	0.0337104	1
GO:0051603	proteolysis involved in cellular protein catabolic process	Biological process	649	25	0.0337578	1
GO:0002415	immunoglobulin transcytosis in epithelial cells mediated by polymeric immunoglobulin receptor	Biological process	2	1	0.0338429	1
GO:0034358	plasma lipoprotein particle	Cellulair comparment	39	3	0.0339599	1
GO:1990777	lipoprotein particle	Cellulair comparment	39	3	0.0339599	1
GO:0035637	multicellular organismal signaling	Biological process	200	11	0.0341533	1
GO:0050877	nervous system process	Biological process	1226	35	0.0345433	1
GO:0016095	polyprenol catabolic process	Biological process	3	1	0.0345458	1
GO:0003312	pancreatic PP cell differentiation	Biological process	2	1	0.0349596	1
GO:0003326	pancreatic A cell fate commitment	Biological process	2	1	0.0349596	1
GO:0003329	pancreatic PP cell fate commitment	Biological process	2	1	0.0349596	1
GO:0046426	negative regulation of JAK-STAT cascade	Biological process	51	4	0.0350369	1
GO:1904893	negative regulation of STAT cascade	Biological process	51	4	0.0350369	1
GO:0015278	calcium-release channel activity	Molecular function	18	3	0.0351371	1
GO:1903673	mitotic cleavage furrow formation	Biological process	1	1	0.0356362	1
GO:0032993	protein-DNA complex	Cellulair comparment	192	8	0.0360227	1
GO:1902227	negative regulation of macrophage colony-stimulating factor signaling pathway	Biological process	2	1	0.03626	1
GO:1903970	negative regulation of response to macrophage colony-stimulating factor	Biological process	2	1	0.03626	1
GO:1903973	negative regulation of cellular response to macrophage colony-stimulating factor stimulus	Biological process	2	1	0.03626	1
GO:1902930	regulation of alcohol biosynthetic process	Biological process	64	5	0.0362717	1
GO:0051015	actin filament binding	Molecular function	155	10	0.0362843	1
GO:0065005	protein-lipid complex assembly	Biological process	31	3	0.0364733	1
GO:0044565	dendritic cell proliferation	Biological process	2	1	0.0366384	1
GO:0032272	negative regulation of protein polymerization	Biological process	61	5	0.0368257	1
GO:1901373	lipid hydroperoxide transport	Biological process	1	1	0.0369825	1
GO:0033814	propanoyl-CoA C-acyltransferase activity	Molecular function	1	1	0.0369825	1
GO:0050632	propionyl-CoA C2-trimethyltridecanoyltransferase activity	Molecular function	1	1	0.0369825	1
GO:2000096	positive regulation of Wnt signaling pathway, planar cell polarity pathway	Biological process	8	2	0.03739	1
GO:1903651	positive regulation of cytoplasmic transport	Biological process	10	2	0.0374967	1
GO:0031400	negative regulation of protein modification process	Biological process	626	25	0.0375288	1
GO:0016020	membrane	Cellulair comparment	8871	237	0.0375897	1
GO:0036038	MKS complex	Cellulair comparment	13	2	0.0378944	1
GO:0042562	hormone binding	Molecular function	64	5	0.0380218	1
GO:0075733	intracellular transport of virus	Biological process	58	4	0.0380877	1
GO:0030041	actin filament polymerization	Biological process	154	9	0.0381765	1
GO:0071360	cellular response to exogenous dsRNA	Biological process	15	2	0.0385551	1
GO:0050789	regulation of biological process	Biological process	11082	288	0.0386819	1
GO:0031396	regulation of protein ubiquitination	Biological process	261	12	0.0388204	1
GO:2000050	regulation of non-canonical Wnt signaling pathway	Biological process	20	3	0.0389667	1
GO:0042273	ribosomal large subunit biogenesis	Biological process	68	4	0.039068	1
GO:0071353	cellular response to interleukin-4	Biological process	30	3	0.0390709	1
GO:1903045	neural crest cell migration involved in sympathetic nervous system development	Biological process	1	1	0.0391258	1
GO:0034332	adherens junction organization	Biological process	123	9	0.0391597	1
GO:0070509	calcium ion import	Biological process	65	5	0.0392031	1
GO:0003108	negative regulation of the force of heart contraction by chemical signal	Biological process	1	1	0.0392322	1
GO:0005615	extracellular space	Cellulair comparment	3792	99	0.0392508	1
GO:0099624	atrial cardiac muscle cell membrane repolarization	Biological process	11	2	0.0393392	1
GO:0065008	regulation of biological quality	Biological process	3512	109	0.0394827	1
GO:0042976	activation of Janus kinase activity	Biological process	13	2	0.0395023	1
GO:0002194	hepatocyte cell migration	Biological process	1	1	0.0395549	1
GO:0043049	otic placode formation	Biological process	1	1	0.0395549	1
GO:0061114	branching involved in pancreas morphogenesis	Biological process	1	1	0.0395549	1
GO:0090425	acinar cell differentiation	Biological process	1	1	0.0395549	1
GO:2000979	positive regulation of forebrain neuron differentiation	Biological process	1	1	0.0395549	1
GO:0032693	negative regulation of interleukin-10 production	Biological process	17	2	0.0396344	1
GO:0045898	regulation of RNA polymerase II transcriptional preinitiation complex assembly	Biological process	14	2	0.0396448	1
GO:0001527	microfibril	Cellulair comparment	10	2	0.0402124	1
GO:0070252	actin-mediated cell contraction	Biological process	110	7	0.0402252	1
GO:1902232	regulation of positive thymic T cell selection	Biological process	2	1	0.0404551	1
GO:1903169	regulation of calcium ion transmembrane transport	Biological process	142	8	0.0408853	1
GO:2000114	regulation of establishment of cell polarity	Biological process	21	3	0.0410355	1
GO:0098659	inorganic cation import across plasma membrane	Biological process	43	4	0.0410864	1
GO:0099587	inorganic ion import across plasma membrane	Biological process	43	4	0.0410864	1
GO:1900017	positive regulation of cytokine production involved in inflammatory response	Biological process	16	2	0.0412793	1
GO:0032153	cell division site	Cellulair comparment	60	5	0.0413427	1
GO:0032155	cell division site part	Cellulair comparment	60	5	0.0413427	1
GO:0033036	macromolecule localization	Biological process	2925	92	0.0414111	1
GO:0000224	peptide-N4-(N-acetyl-beta-glucosaminyl)asparagine amidase activity	Molecular function	1	1	0.0415207	1
GO:0042462	eye photoreceptor cell development	Biological process	31	3	0.0415459	1
GO:0001949	sebaceous gland cell differentiation	Biological process	1	1	0.041631	1
GO:0080132	fatty acid alpha-hydroxylase activity	Molecular function	1	1	0.041631	1
GO:0021800	cerebral cortex tangential migration	Biological process	8	2	0.0416759	1
GO:0006335	DNA replication-dependent nucleosome assembly	Biological process	30	2	0.0418293	1
GO:0034723	DNA replication-dependent nucleosome organization	Biological process	30	2	0.0418293	1
GO:0022839	ion gated channel activity	Molecular function	45	4	0.0418954	1
GO:0007218	neuropeptide signaling pathway	Biological process	102	5	0.0419108	1
GO:0042297	vocal learning	Biological process	7	2	0.0421886	1
GO:0098596	imitative learning	Biological process	7	2	0.0421886	1
GO:0044599	AP-5 adaptor complex	Cellulair comparment	1	1	0.0423378	1
GO:0002386	immune response in mucosal-associated lymphoid tissue	Biological process	3	1	0.0424694	1
GO:0021575	hindbrain morphogenesis	Biological process	40	4	0.0425934	1
GO:0033383	geranyl diphosphate metabolic process	Biological process	2	1	0.042632	1
GO:0033384	geranyl diphosphate biosynthetic process	Biological process	2	1	0.042632	1
GO:0045337	farnesyl diphosphate biosynthetic process	Biological process	2	1	0.042632	1
GO:0004161	dimethylallyltranstransferase activity	Molecular function	2	1	0.042632	1
GO:0004337	geranyltranstransferase activity	Molecular function	2	1	0.042632	1
GO:0032994	protein-lipid complex	Cellulair comparment	41	3	0.0426586	1
GO:0005515	protein binding	Molecular function	11154	303	0.0428051	1
GO:0002244	hematopoietic progenitor cell differentiation	Biological process	184	9	0.0428091	1
GO:0050919	negative chemotaxis	Biological process	36	4	0.0428745	1
GO:0008016	regulation of heart contraction	Biological process	242	12	0.0428859	1
GO:0070102	interleukin-6-mediated signaling pathway	Biological process	10	2	0.0430391	1
GO:0006508	proteolysis	Biological process	1709	52	0.0430955	1
GO:0034976	response to endoplasmic reticulum stress	Biological process	271	12	0.0433225	1
GO:0032501	multicellular organismal process	Biological process	7193	197	0.0434699	1
GO:0000049	tRNA binding	Molecular function	52	4	0.0435193	1
GO:0032574	5'-3' RNA helicase activity	Molecular function	1	1	0.0436346	1
GO:0032575	ATP-dependent 5'-3' RNA helicase activity	Molecular function	1	1	0.0436346	1
GO:0007031	peroxisome organization	Biological process	31	3	0.0436534	1
GO:0000301	retrograde transport, vesicle recycling within Golgi	Biological process	11	2	0.0436906	1
GO:0060683	regulation of branching involved in salivary gland morphogenesis by epithelial-mesenchymal signaling	Biological process	1	1	0.0437116	1
GO:1990401	embryonic lung development	Biological process	1	1	0.0437116	1
GO:0006898	receptor-mediated endocytosis	Biological process	282	13	0.0439708	1
GO:0008233	peptidase activity	Molecular function	606	21	0.043997	1
GO:0005366	myo-inositol:proton symporter activity	Molecular function	1	1	0.0443711	1
GO:0000048	peptidyltransferase activity	Molecular function	2	1	0.0447001	1
GO:0002951	leukotriene-C(4) hydrolase	Molecular function	2	1	0.0447001	1
GO:0097362	MCM8-MCM9 complex	Cellulair comparment	2	1	0.0449294	1
GO:0032403	protein complex binding	Molecular function	792	31	0.0449649	1
GO:0060074	synapse maturation	Biological process	19	3	0.044991	1
GO:0070628	proteasome binding	Molecular function	12	2	0.045069	1
GO:0051823	regulation of synapse structural plasticity	Biological process	9	2	0.0451195	1
GO:0021517	ventral spinal cord development	Biological process	44	4	0.0452583	1
GO:0007009	plasma membrane organization	Biological process	75	6	0.0453085	1
GO:0090129	positive regulation of synapse maturation	Biological process	9	2	0.0454319	1
GO:0030502	negative regulation of bone mineralization	Biological process	18	2	0.0456013	1
GO:0015910	peroxisomal long-chain fatty acid import	Biological process	2	1	0.0456657	1
GO:0070647	protein modification by small protein conjugation or removal	Biological process	1107	38	0.0456749	1
GO:0086009	membrane repolarization	Biological process	46	4	0.0457178	1
GO:0000109	nucleotide-excision repair complex	Cellulair comparment	15	2	0.0457295	1
GO:0071216	cellular response to biotic stimulus	Biological process	194	9	0.045773	1
GO:0021681	cerebellar granular layer development	Biological process	11	2	0.0458754	1
GO:0005215	transporter activity	Molecular function	1388	46	0.0459487	1
GO:0099106	ion channel regulator activity	Molecular function	93	6	0.0459931	1
GO:0044345	stromal-epithelial cell signaling involved in prostate gland development	Biological process	1	1	0.0460501	1
GO:0090246	convergent extension involved in somitogenesis	Biological process	1	1	0.0460501	1
GO:2000080	negative regulation of canonical Wnt signaling pathway involved in controlling type B pancreatic cell proliferation	Biological process	1	1	0.0460501	1
GO:0071514	genetic imprinting	Biological process	27	3	0.0461159	1
GO:0045792	negative regulation of cell size	Biological process	10	2	0.0461837	1
GO:0051140	regulation of NK T cell proliferation	Biological process	4	1	0.0461842	1
GO:0051142	positive regulation of NK T cell proliferation	Biological process	4	1	0.0461842	1
GO:2000650	negative regulation of sodium ion transmembrane transporter activity	Biological process	10	2	0.0463495	1
GO:0034260	negative regulation of GTPase activity	Biological process	46	4	0.0464075	1
GO:0015085	calcium ion transmembrane transporter activity	Molecular function	135	9	0.0464635	1
GO:0097119	postsynaptic density protein 95 clustering	Biological process	9	2	0.0465395	1
GO:0030449	regulation of complement activation	Biological process	47	3	0.0465761	1
GO:0060730	regulation of intestinal epithelial structure maintenance	Biological process	2	1	0.0466047	1
GO:0050528	acyloxyacyl hydrolase activity	Molecular function	1	1	0.046655	1
GO:0015688	iron chelate transport	Biological process	3	1	0.0467174	1
GO:0015891	siderophore transport	Biological process	3	1	0.0467174	1
GO:0097104	postsynaptic membrane assembly	Biological process	10	2	0.046895	1
GO:0051127	positive regulation of actin nucleation	Biological process	12	2	0.0470405	1
GO:0070168	negative regulation of biomineral tissue development	Biological process	19	2	0.0470953	1
GO:0001845	phagolysosome assembly	Biological process	11	2	0.0473818	1
GO:0007600	sensory perception	Biological process	880	22	0.0474411	1
GO:0033993	response to lipid	Biological process	903	31	0.0474496	1
GO:0001711	endodermal cell fate commitment	Biological process	16	2	0.0476294	1
GO:0035282	segmentation	Biological process	95	6	0.0476641	1
GO:0086011	membrane repolarization during action potential	Biological process	29	3	0.0476675	1
GO:0015389	pyrimidine- and adenine-specific:sodium symporter activity	Molecular function	2	1	0.0476859	1
GO:0035249	synaptic transmission, glutamatergic	Biological process	77	6	0.047686	1
GO:0051966	regulation of synaptic transmission, glutamatergic	Biological process	59	5	0.0477265	1
GO:0060538	skeletal muscle organ development	Biological process	164	9	0.0477485	1
GO:1903182	regulation of SUMO transferase activity	Biological process	1	1	0.0477939	1
GO:1903755	positive regulation of SUMO transferase activity	Biological process	1	1	0.0477939	1
GO:1990356	sumoylated E2 ligase complex	Cellulair comparment	1	1	0.0477939	1
GO:0061656	SUMO conjugating enzyme activity	Molecular function	1	1	0.0477939	1
GO:0001829	trophectodermal cell differentiation	Biological process	15	2	0.0478569	1
GO:0050727	regulation of inflammatory response	Biological process	324	12	0.0478645	1
GO:2000257	regulation of protein activation cascade	Biological process	48	3	0.0478857	1
GO:0099040	ceramide translocation	Biological process	1	1	0.0480096	1
GO:0099038	ceramide-translocating ATPase activity	Molecular function	1	1	0.0480096	1
GO:0070670	response to interleukin-4	Biological process	33	3	0.0482684	1
GO:0048239	negative regulation of DNA recombination at telomere	Biological process	2	1	0.0482724	1
GO:0072695	regulation of DNA recombination at telomere	Biological process	2	1	0.0482724	1
GO:0045553	TRAIL biosynthetic process	Biological process	1	1	0.0483266	1
GO:0045554	regulation of TRAIL biosynthetic process	Biological process	1	1	0.0483266	1
GO:0045556	positive regulation of TRAIL biosynthetic process	Biological process	1	1	0.0483266	1
GO:0004467	long-chain fatty acid-CoA ligase activity	Molecular function	13	2	0.0483613	1
GO:0030833	regulation of actin filament polymerization	Biological process	139	8	0.0484528	1
GO:0032957	inositol trisphosphate metabolic process	Biological process	10	2	0.0489104	1
GO:0008623	CHRAC	Cellulair comparment	2	1	0.0489694	1
GO:1903561	extracellular vesicle	Cellulair comparment	2754	79	0.0490461	1
GO:1902766	skeletal muscle satellite cell migration	Biological process	2	1	0.0491016	1
GO:0030054	cell junction	Cellulair comparment	1215	48	0.0491836	1
GO:0086008	voltage-gated potassium channel activity involved in cardiac muscle cell action potential repolarization	Molecular function	12	2	0.049247	1
GO:1901618	organic hydroxy compound transmembrane transporter activity	Molecular function	41	3	0.0493274	1
GO:0009987	cellular process	Biological process	15321	381	0.0493487	1
GO:0006892	post-Golgi vesicle-mediated transport	Biological process	89	6	0.0493556	1
GO:0043230	extracellular organelle	Cellulair comparment	2756	79	0.0494235	1
GO:0001632	leukotriene B4 receptor activity	Molecular function	2	1	0.0494639	1
GO:0008154	actin polymerization or depolymerization	Biological process	182	10	0.0494827	1
GO:0046873	metal ion transmembrane transporter activity	Molecular function	447	20	0.049559	1
GO:0001544	initiation of primordial ovarian follicle growth	Biological process	1	1	0.0495617	1
GO:0030279	negative regulation of ossification	Biological process	71	5	0.0496875	1
GO:1904338	regulation of dopaminergic neuron differentiation	Biological process	10	2	0.0497205	1

## Sheet: KEGG remittent - persistent
	Pathway	N genes in pathway	N genes p < 10-3 in pathway	p-value	FDR-adjusted p-value
path:hsa03320	PPAR signaling pathway	74	7	0.00149008	0.491726
path:hsa04972	Pancreatic secretion	95	8	0.00355696	0.58508
path:hsa04925	Aldosterone synthesis and secretion	96	9	0.0053189	0.58508
path:hsa04950	Maturity onset diabetes of the young	26	3	0.0213043	1
path:hsa04911	Insulin secretion	85	7	0.0218707	1
path:hsa04740	Olfactory transduction	391	7	0.035363	1
path:hsa04971	Gastric acid secretion	75	6	0.0364088	1
path:hsa04974	Protein digestion and absorption	88	6	0.036772	1
path:hsa04146	Peroxisome	83	5	0.0387248	1
path:hsa03013	RNA transport	155	7	0.0478028	1
path:hsa04520	Adherens junction	72	6	0.04792	1

## Sheet: GO control - persistent
	Term	Class	N genes in GO term	N genes p < 10-3 in GO term	p-value	FDR-adjusted p-value
GO:0032956	regulation of actin cytoskeleton organization	BP	290	15	0.000353661429582383	1
GO:0110053	regulation of actin filament organization	BP	231	13	0.000388812897397588	1
GO:1902903	regulation of supramolecular fiber organization	BP	301	15	0.000405348609138525	1
GO:0032535	regulation of cellular component size	BP	321	16	0.00045057902309258	1
GO:0010638	positive regulation of organelle organization	BP	620	23	0.000527716942341311	1
GO:0090066	regulation of anatomical structure size	BP	455	19	0.000625319925360476	1
GO:0000430	regulation of transcription from RNA polymerase II promoter by glucose	BP	3	2	0.00065522724736902	1
GO:0000432	positive regulation of transcription from RNA polymerase II promoter by glucose	BP	3	2	0.00065522724736902	1
GO:0060980	cell migration involved in coronary vasculogenesis	BP	3	2	0.000801471711425332	1
GO:0098858	actin-based cell projection	CC	189	11	0.000866470409220963	1
GO:0005654	nucleoplasm	CC	3274	77	0.000921133300499947	1
GO:0000429	carbon catabolite regulation of transcription from RNA polymerase II promoter	BP	4	2	0.00102998702698031	1
GO:0000436	carbon catabolite activation of transcription from RNA polymerase II promoter	BP	4	2	0.00102998702698031	1
GO:0030010	establishment of cell polarity	BP	120	9	0.00103702201001411	1
GO:0051130	positive regulation of cellular component organization	BP	1167	36	0.00106406350512171	1
GO:2000543	positive regulation of gastrulation	BP	11	3	0.001081710102348	1
GO:0008361	regulation of cell size	BP	148	10	0.00111996360751245	1
GO:0043005	neuron projection	CC	1102	36	0.00132506500913749	1
GO:0030029	actin filament-based process	BP	679	25	0.00138838917762562	1
GO:0030836	positive regulation of actin filament depolymerization	BP	13	3	0.00139534404184628	1
GO:0046016	positive regulation of transcription by glucose	BP	4	2	0.00156875766272018	1
GO:0032970	regulation of actin filament-based process	BP	334	15	0.00171961470119386	1
GO:0030834	regulation of actin filament depolymerization	BP	49	5	0.00183558875877532	1
GO:0071437	invadopodium	CC	15	3	0.00186667521751133	1
GO:0031974	membrane-enclosed lumen	CC	4953	103	0.00187040289654621	1
GO:0043233	organelle lumen	CC	4953	103	0.00187040289654621	1
GO:0070013	intracellular organelle lumen	CC	4953	103	0.00187040289654621	1
GO:0060406	positive regulation of penile erection	BP	4	2	0.00204227273147361	1
GO:0045664	regulation of neuron differentiation	BP	565	23	0.00210553500770122	1
GO:0045991	carbon catabolite activation of transcription	BP	5	2	0.00211036791650846	1
GO:0030036	actin cytoskeleton organization	BP	587	22	0.002112468340161	1
GO:1901879	regulation of protein depolymerization	BP	71	6	0.00212677314760293	1
GO:0007015	actin filament organization	BP	348	15	0.00250650470215838	1
GO:0005578	proteinaceous extracellular matrix	CC	362	15	0.00261309802192646	1
GO:0030042	actin filament depolymerization	BP	52	5	0.00264478588275889	1
GO:0015629	actin cytoskeleton	CC	453	18	0.0029064653911861	1
GO:0035441	cell migration involved in vasculogenesis	BP	5	2	0.00293136205118615	1
GO:0030425	dendrite	CC	494	20	0.00296985878732674	1
GO:0098862	cluster of actin-based cell projections	CC	137	8	0.0030899850687951	1
GO:0030155	regulation of cell adhesion	BP	664	22	0.00310788532792039	1
GO:0045665	negative regulation of neuron differentiation	BP	192	11	0.00311263947391548	1
GO:0045454	cell redox homeostasis	BP	70	5	0.00318246637566115	1
GO:0022604	regulation of cell morphogenesis	BP	427	18	0.00324807734308571	1
GO:0051971	positive regulation of transmission of nerve impulse	BP	7	2	0.00340023794651389	1
GO:1901881	positive regulation of protein depolymerization	BP	18	3	0.00345124388802903	1
GO:0031981	nuclear lumen	CC	3857	84	0.00356308651973404	1
GO:0005938	cell cortex	CC	244	12	0.00371119957489683	1
GO:0097435	supramolecular fiber organization	BP	570	20	0.00375849148534474	1
GO:0060284	regulation of cell development	BP	817	28	0.00386592094890731	1
GO:0045990	carbon catabolite regulation of transcription	BP	6	2	0.00397290158941081	1
GO:1903003	positive regulation of protein deubiquitination	BP	6	2	0.00397744177670226	1
GO:0070244	negative regulation of thymocyte apoptotic process	BP	7	2	0.00412794995092361	1
GO:0060405	regulation of penile erection	BP	6	2	0.00417394693866603	1
GO:0098641	cadherin binding involved in cell-cell adhesion	MF	18	3	0.00439903829682028	1
GO:0048646	anatomical structure formation involved in morphogenesis	BP	1020	31	0.00446971540773886	1
GO:0045596	negative regulation of cell differentiation	BP	644	22	0.00448911673235845	1
GO:0046015	regulation of transcription by glucose	BP	6	2	0.00455926571490958	1
GO:1905209	positive regulation of cardiocyte differentiation	BP	38	4	0.00470639570623337	1
GO:0050839	cell adhesion molecule binding	MF	461	17	0.00475206455256769	1
GO:0097061	dendritic spine organization	BP	67	6	0.00491825953265258	1
GO:0038201	TOR complex	CC	15	3	0.00503276346912828	1
GO:0050767	regulation of neurogenesis	BP	692	25	0.00505796186063027	1
GO:0030859	polarized epithelial cell differentiation	BP	19	3	0.00515079523996366	1
GO:0030054	cell junction	CC	1208	36	0.00544600519833919	1
GO:0015889	cobalamin transport	BP	8	2	0.00546069330251558	1
GO:0106027	neuron projection organization	BP	70	6	0.0055185814328409	1
GO:0060973	cell migration involved in heart development	BP	18	3	0.00554650601986241	1
GO:0033013	tetrapyrrole metabolic process	BP	57	4	0.00561289253763081	1
GO:0008154	actin polymerization or depolymerization	BP	182	9	0.00566821021732853	1
GO:0046501	protoporphyrinogen IX metabolic process	BP	10	2	0.00590675142996225	1
GO:0048263	determination of dorsal identity	BP	9	2	0.00610576362580422	1
GO:0036089	cleavage furrow formation	BP	7	2	0.00641099204858786	1
GO:0045654	positive regulation of megakaryocyte differentiation	BP	6	2	0.00647177723758286	1
GO:0034663	endoplasmic reticulum chaperone complex	CC	10	2	0.00652535344551869	1
GO:0072103	glomerulus vasculature morphogenesis	BP	5	2	0.00656981362975535	1
GO:0072104	glomerular capillary formation	BP	5	2	0.00656981362975535	1
GO:0005903	brush border	CC	94	6	0.00658700582140182	1
GO:0048170	positive regulation of long-term neuronal synaptic plasticity	BP	5	2	0.00671098578124477	1
GO:0060979	vasculogenesis involved in coronary vascular morphogenesis	BP	6	2	0.00697182237627939	1
GO:0010771	negative regulation of cell morphogenesis involved in differentiation	BP	79	6	0.00701301668716282	1
GO:0097458	neuron part	CC	1402	40	0.00702238260685368	1
GO:0008064	regulation of actin polymerization or depolymerization	BP	158	8	0.00708455712310961	1
GO:0060997	dendritic spine morphogenesis	BP	49	5	0.00721720858738298	1
GO:0070161	anchoring junction	CC	521	19	0.00723633260566355	1
GO:0044428	nuclear part	CC	4202	88	0.00725659858660626	1
GO:0030832	regulation of actin filament length	BP	159	8	0.00729877127361318	1
GO:0040019	positive regulation of embryonic development	BP	37	4	0.00732206027688189	1
GO:0002040	sprouting angiogenesis	BP	98	6	0.00734212831382555	1
GO:0051261	protein depolymerization	BP	93	6	0.0076046773364649	1
GO:0032420	stereocilium	CC	42	4	0.00774659334877856	1
GO:0015761	mannose transport	BP	1	1	0.00779983065673052	1
GO:0015578	mannose transmembrane transporter activity	MF	1	1	0.00779983065673052	1
GO:0048262	determination of dorsal/ventral asymmetry	BP	10	2	0.00786571253273352	1
GO:0051493	regulation of cytoskeleton organization	BP	451	16	0.00799169454544774	1
GO:0043084	penile erection	BP	9	2	0.00805923808981593	1
GO:0051128	regulation of cellular component organization	BP	2291	56	0.00826500168998519	1
GO:0099568	cytoplasmic region	CC	306	13	0.00836985019121108	1
GO:0043244	regulation of protein complex disassembly	BP	96	6	0.00876252620770834	1
GO:0030681	multimeric ribonuclease P complex	CC	10	2	0.00880486997195269	1
GO:0007219	Notch signaling pathway	BP	167	8	0.00884488558424787	1
GO:0090085	regulation of protein deubiquitination	BP	10	2	0.00895080884208693	1
GO:0003972	RNA ligase (ATP) activity	MF	1	1	0.00921131210970258	1
GO:0008452	RNA ligase activity	MF	1	1	0.00921131210970258	1
GO:0005788	endoplasmic reticulum lumen	CC	296	11	0.00942038697845645	1
GO:0031646	positive regulation of neurological system process	BP	24	3	0.00981235008445408	1
GO:2000727	positive regulation of cardiac muscle cell differentiation	BP	27	3	0.010000571842588	1
GO:0072077	renal vesicle morphogenesis	BP	19	3	0.010033988253453	1
GO:1902362	melanocyte apoptotic process	BP	1	1	0.0100641316970558	1
GO:0003176	aortic valve development	BP	6	2	0.0102977991236841	1
GO:0003180	aortic valve morphogenesis	BP	6	2	0.0102977991236841	1
GO:0004526	ribonuclease P activity	MF	11	2	0.0103293507806487	1
GO:0022411	cellular component disassembly	BP	558	17	0.0103401077444893	1
GO:0009952	anterior/posterior pattern specification	BP	202	10	0.0104241942415081	1
GO:0010769	regulation of cell morphogenesis involved in differentiation	BP	254	12	0.0104941793501091	1
GO:0033131	regulation of glucokinase activity	BP	10	2	0.0106219466131937	1
GO:0004853	uroporphyrinogen decarboxylase activity	MF	1	1	0.0107038533276594	1
GO:0061001	regulation of dendritic spine morphogenesis	BP	36	4	0.0109946963408787	1
GO:0051960	regulation of nervous system development	BP	782	26	0.0110857667712326	1
GO:0008890	glycine C-acetyltransferase activity	MF	1	1	0.0111941579393809	1
GO:0072087	renal vesicle development	BP	20	3	0.0113219126820757	1
GO:0070229	negative regulation of lymphocyte apoptotic process	BP	30	3	0.0113797383819867	1
GO:0097194	execution phase of apoptosis	BP	78	5	0.0114342006482124	1
GO:0071803	positive regulation of podosome assembly	BP	10	2	0.0114430615738634	1
GO:0061438	renal system vasculature morphogenesis	BP	7	2	0.0115468901114008	1
GO:0061439	kidney vasculature morphogenesis	BP	7	2	0.0115468901114008	1
GO:0001682	tRNA 5'-leader removal	BP	12	2	0.0116288383529181	1
GO:0048842	positive regulation of axon extension involved in axon guidance	BP	7	2	0.0116526781961134	1
GO:0008140	cAMP response element binding protein binding	MF	8	2	0.0116737732214395	1
GO:0005912	adherens junction	CC	504	18	0.011691176585412	1
GO:0014855	striated muscle cell proliferation	BP	73	5	0.0117759131764485	1
GO:0070176	DRM complex	CC	1	1	0.0119260530881976	1
GO:1903299	regulation of hexokinase activity	BP	11	2	0.011934191677749	1
GO:0032421	stereocilium bundle	CC	49	4	0.0120800402394506	1
GO:0051496	positive regulation of stress fiber assembly	BP	47	4	0.0122192918541042	1
GO:0008092	cytoskeletal protein binding	MF	859	26	0.0122533347120512	1
GO:0010810	regulation of cell-substrate adhesion	BP	189	9	0.0122836454173718	1
GO:0033080	immature T cell proliferation in thymus	BP	7	2	0.0123722692327364	1
GO:0086094	positive regulation of ryanodine-sensitive calcium-release channel activity by adrenergic receptor signaling pathway involved in positive regulation of cardiac muscle contraction	BP	2	1	0.0124325721560149	1
GO:0021754	facial nucleus development	BP	1	1	0.0124526879984307	1
GO:0004491	methylmalonate-semialdehyde dehydrogenase (acylating) activity	MF	1	1	0.0125450934991362	1
GO:0018478	malonate-semialdehyde dehydrogenase (acetylating) activity	MF	1	1	0.0125450934991362	1
GO:0030175	filopodium	CC	96	6	0.0126741448458345	1
GO:0031018	endocrine pancreas development	BP	45	4	0.0126996597180424	1
GO:0030262	apoptotic nuclear changes	BP	29	3	0.0127869279642559	1
GO:0007163	establishment or maintenance of cell polarity	BP	181	9	0.012977383662472	1
GO:0072161	mesenchymal cell differentiation involved in kidney development	BP	8	2	0.0130957800522161	1
GO:2001012	mesenchymal cell differentiation involved in renal system development	BP	8	2	0.0130957800522161	1
GO:0014842	regulation of skeletal muscle satellite cell proliferation	BP	10	2	0.0134161742483518	1
GO:0031686	A1 adenosine receptor binding	MF	1	1	0.0134870748800549	1
GO:0045032	ADP-activated adenosine receptor activity	MF	1	1	0.0134870748800549	1
GO:0031931	TORC1 complex	CC	7	2	0.0135304186671071	1
GO:1902669	positive regulation of axon guidance	BP	8	2	0.0136858383495219	1
GO:0030677	ribonuclease P complex	CC	13	2	0.0138852659448212	1
GO:0043522	leucine zipper domain binding	MF	11	2	0.0139161840180104	1
GO:0030426	growth cone	CC	151	8	0.0139604462271175	1
GO:0071795	K11-linked polyubiquitin modification-dependent protein binding	MF	1	1	0.013966624886723	1
GO:0030182	neuron differentiation	BP	1245	37	0.0139837466118534	1
GO:0017022	myosin binding	MF	59	4	0.0140271980526378	1
GO:0043035	chromatin insulator sequence binding	MF	1	1	0.0141261000725214	1
GO:0060996	dendritic spine development	BP	85	6	0.0141943811211423	1
GO:1905878	invadopodium disassembly	BP	1	1	0.0145193306724336	1
GO:1905927	regulation of invadopodium disassembly	BP	1	1	0.0145193306724336	1
GO:1905929	positive regulation of invadopodium disassembly	BP	1	1	0.0145193306724336	1
GO:0031012	extracellular matrix	CC	546	17	0.0146142419708546	1
GO:0090307	mitotic spindle assembly	BP	59	4	0.0146344363997936	1
GO:0051240	positive regulation of multicellular organismal process	BP	1525	38	0.014855678261554	1
GO:0032963	collagen metabolic process	BP	123	6	0.0148986183159561	1
GO:0033043	regulation of organelle organization	BP	1184	31	0.0149245246099254	1
GO:0033079	immature T cell proliferation	BP	9	2	0.015218326515676	1
GO:0005178	integrin binding	MF	111	6	0.0154346244974278	1
GO:0045165	cell fate commitment	BP	253	11	0.0157084881691515	1
GO:0010999	regulation of eIF2 alpha phosphorylation by heme	BP	1	1	0.0157350739234479	1
GO:0045993	negative regulation of translational initiation by iron	BP	1	1	0.0157350739234479	1
GO:0046986	negative regulation of hemoglobin biosynthetic process	BP	1	1	0.0157350739234479	1
GO:0044448	cell cortex part	CC	132	7	0.0157638861033385	1
GO:0000433	negative regulation of transcription from RNA polymerase II promoter by glucose	BP	1	1	0.0158052620784687	1
GO:0000437	carbon catabolite repression of transcription from RNA polymerase II promoter	BP	1	1	0.0158052620784687	1
GO:2000970	regulation of detection of glucose	BP	1	1	0.0158052620784687	1
GO:2000971	negative regulation of detection of glucose	BP	1	1	0.0158052620784687	1
GO:0060998	regulation of dendritic spine development	BP	63	5	0.0158809501607345	1
GO:0010721	negative regulation of cell development	BP	287	12	0.0159867809767807	1
GO:0001771	immunological synapse formation	BP	13	2	0.0160103134246477	1
GO:0072033	renal vesicle formation	BP	8	2	0.0160210962239649	1
GO:0006921	cellular component disassembly involved in execution phase of apoptosis	BP	31	3	0.0160611899331462	1
GO:0045843	negative regulation of striated muscle tissue development	BP	52	4	0.0161471181998268	1
GO:0050768	negative regulation of neurogenesis	BP	246	11	0.0164253288165434	1
GO:0002067	glandular epithelial cell differentiation	BP	47	4	0.0164498321679402	1
GO:0050918	positive chemotaxis	BP	59	4	0.0165504774587039	1
GO:0072012	glomerulus vasculature development	BP	25	3	0.016631130846628	1
GO:0018904	ether metabolic process	BP	16	2	0.0168120583761908	1
GO:0010975	regulation of neuron projection development	BP	416	16	0.0169060173574316	1
GO:0030427	site of polarized growth	CC	156	8	0.0171219851726132	1
GO:1903780	negative regulation of cardiac conduction	BP	3	1	0.0171226765603008	1
GO:0014841	skeletal muscle satellite cell proliferation	BP	11	2	0.0171407384532394	1
GO:0044259	multicellular organismal macromolecule metabolic process	BP	128	6	0.0174284331575679	1
GO:0050650	chondroitin sulfate proteoglycan biosynthetic process	BP	29	3	0.0174871237328839	1
GO:0008507	sodium:iodide symporter activity	MF	1	1	0.0175104021791935	1
GO:0015373	monovalent anion:sodium symporter activity	MF	1	1	0.0175104021791935	1
GO:2000158	positive regulation of ubiquitin-specific protease activity	BP	2	1	0.0178370323118924	1
GO:0035800	deubiquitinase activator activity	MF	2	1	0.0178370323118924	1
GO:0048635	negative regulation of muscle organ development	BP	54	4	0.0178857108077861	1
GO:0045792	negative regulation of cell size	BP	10	2	0.0179158869231208	1
GO:0010977	negative regulation of neuron projection development	BP	127	7	0.0179695844136776	1
GO:0030534	adult behavior	BP	138	7	0.0179759000231773	1
GO:0014857	regulation of skeletal muscle cell proliferation	BP	11	2	0.0180755836332385	1
GO:0010712	regulation of collagen metabolic process	BP	43	3	0.0181114366731733	1
GO:0071840	cellular component organization or biogenesis	BP	6114	120	0.018149200960563	1
GO:0044422	organelle part	CC	8869	159	0.0181499264728251	1
GO:0055025	positive regulation of cardiac muscle tissue development	BP	57	4	0.0181560284201609	1
GO:0098609	cell-cell adhesion	BP	798	23	0.0182069210170505	1
GO:1990730	VCP-NSFL1C complex	CC	2	1	0.0184821670604735	1
GO:0042995	cell projection	CC	1907	47	0.0184858733892663	1
GO:0010902	positive regulation of very-low-density lipoprotein particle remodeling	BP	2	1	0.0186355148215366	1
GO:0036477	somatodendritic compartment	CC	691	22	0.0187144062726861	1
GO:0005537	mannose binding	MF	16	2	0.0187747825096776	1
GO:0051967	negative regulation of synaptic transmission, glutamatergic	BP	14	2	0.0188273396418422	1
GO:0070243	regulation of thymocyte apoptotic process	BP	12	2	0.0189016985496003	1
GO:0031032	actomyosin structure organization	BP	176	8	0.0189030069291484	1
GO:0046933	proton-transporting ATP synthase activity, rotational mechanism	MF	17	2	0.0189405240375408	1
GO:0044324	regulation of transcription involved in anterior/posterior axis specification	BP	2	1	0.0189818896164761	1
GO:0035611	protein branching point deglutamylation	BP	1	1	0.0189878090837043	1
GO:0022603	regulation of anatomical structure morphogenesis	BP	994	28	0.0190000852806613	1
GO:1905912	regulation of calcium ion export across plasma membrane	BP	3	1	0.0193440999106495	1
GO:1905913	negative regulation of calcium ion export across plasma membrane	BP	3	1	0.0193440999106495	1
GO:2000212	negative regulation of glutamate metabolic process	BP	1	1	0.0194055496925841	1
GO:1905207	regulation of cardiocyte differentiation	BP	58	4	0.0194741547140349	1
GO:0010719	negative regulation of epithelial to mesenchymal transition	BP	29	3	0.0195706224054352	1
GO:0032233	positive regulation of actin filament bundle assembly	BP	55	4	0.0195752507617133	1
GO:0085032	modulation by symbiont of host I-kappaB kinase/NF-kappaB cascade	BP	1	1	0.0196061555813466	1
GO:0005581	collagen trimer	CC	88	5	0.019644581254664	1
GO:1901862	negative regulation of muscle tissue development	BP	54	4	0.0196507363055831	1
GO:0098632	cell-cell adhesion mediator activity	MF	31	3	0.0196667516772028	1
GO:0030366	molybdopterin synthase activity	MF	2	1	0.0197427110426445	1
GO:0051017	actin filament bundle assembly	BP	132	7	0.0197640508459282	1
GO:0044246	regulation of multicellular organismal metabolic process	BP	44	3	0.0197880425153112	1
GO:0072102	glomerulus morphogenesis	BP	8	2	0.0197918377537468	1
GO:0072015	glomerular visceral epithelial cell development	BP	11	2	0.0198618984285933	1
GO:0060677	ureteric bud elongation	BP	8	2	0.0198678943734614	1
GO:0033961	cis-stilbene-oxide hydrolase activity	MF	1	1	0.0199099349416551	1
GO:0031016	pancreas development	BP	77	5	0.0200483787222088	1
GO:0061437	renal system vasculature development	BP	27	3	0.0201001096795716	1
GO:0061440	kidney vasculature development	BP	27	3	0.0201001096795716	1
GO:1903673	mitotic cleavage furrow formation	BP	1	1	0.0203007680456878	1
GO:0007162	negative regulation of cell adhesion	BP	244	9	0.0204687380750586	1
GO:0007160	cell-matrix adhesion	BP	204	9	0.0204796402920235	1
GO:0043226	organelle	CC	12886	218	0.0209992356417882	1
GO:0001568	blood vessel development	BP	635	19	0.0214022998251535	1
GO:0007588	excretion	BP	67	4	0.0214548941516386	1
GO:0043542	endothelial cell migration	BP	182	8	0.02155886806164	1
GO:0030208	dermatan sulfate biosynthetic process	BP	12	2	0.0215589046254251	1
GO:2000016	negative regulation of determination of dorsal identity	BP	2	1	0.0216377599072957	1
GO:0045198	establishment of epithelial cell apical/basal polarity	BP	13	2	0.0216774437045236	1
GO:0072273	metanephric nephron morphogenesis	BP	26	3	0.0219382258799587	1
GO:0004602	glutathione peroxidase activity	MF	20	2	0.0221347257711035	1
GO:0043243	positive regulation of protein complex disassembly	BP	33	3	0.0221789533821389	1
GO:0014856	skeletal muscle cell proliferation	BP	12	2	0.0222854044581951	1
GO:0061572	actin filament bundle organization	BP	135	7	0.022308800560087	1
GO:0000978	RNA polymerase II core promoter proximal region sequence-specific DNA binding	MF	359	13	0.0223379731981514	1
GO:0090162	establishment of epithelial cell polarity	BP	28	3	0.0224339367296388	1
GO:0004004	ATP-dependent RNA helicase activity	MF	66	4	0.0224536427882602	1
GO:0072310	glomerular epithelial cell development	BP	12	2	0.0225374374402993	1
GO:0008186	RNA-dependent ATPase activity	MF	67	4	0.0226924970030124	1
GO:0071464	cellular response to hydrostatic pressure	BP	2	1	0.022773121029806	1
GO:0110020	regulation of actomyosin structure organization	BP	85	5	0.0228166564332937	1
GO:0004549	tRNA-specific ribonuclease activity	MF	16	2	0.0230553575304528	1
GO:0040030	regulation of molecular function, epigenetic	BP	2	1	0.0231266921386268	1
GO:1990617	CHOP-ATF4 complex	CC	2	1	0.0232004605572265	1
GO:0071801	regulation of podosome assembly	BP	14	2	0.0232262309031315	1
GO:0048813	dendrite morphogenesis	BP	123	7	0.0234294635690405	1
GO:0120025	plasma membrane bounded cell projection	CC	1835	45	0.0234542660297095	1
GO:0003724	RNA helicase activity	MF	67	4	0.0235442815018669	1
GO:0060230	lipoprotein lipase activator activity	MF	3	1	0.0237350108519748	1
GO:1902117	positive regulation of organelle assembly	BP	65	4	0.0237560222650584	1
GO:0120035	regulation of plasma membrane bounded cell projection organization	BP	560	19	0.0238446049888006	1
GO:0017166	vinculin binding	MF	10	2	0.0239471240377991	1
GO:0002102	podosome	CC	29	3	0.0241982152628832	1
GO:0008037	cell recognition	BP	140	6	0.0242399964860589	1
GO:0051969	regulation of transmission of nerve impulse	BP	18	2	0.0243677370086597	1
GO:0006433	prolyl-tRNA aminoacylation	BP	2	1	0.0243736930626788	1
GO:0004827	proline-tRNA ligase activity	MF	2	1	0.0243736930626788	1
GO:0005546	phosphatidylinositol-4,5-bisphosphate binding	MF	60	4	0.0245568516990586	1
GO:0040036	regulation of fibroblast growth factor receptor signaling pathway	BP	31	3	0.0245766530497423	1
GO:0016043	cellular component organization	BP	5909	116	0.0246954954487858	1
GO:2000446	regulation of macrophage migration inhibitory factor signaling pathway	BP	1	1	0.024713726163255	1
GO:0031432	titin binding	MF	14	2	0.0248426557935942	1
GO:0030207	chondroitin sulfate catabolic process	BP	14	2	0.0248584484417549	1
GO:0005539	glycosaminoglycan binding	MF	210	8	0.0249032924593364	1
GO:0036488	CHOP-C/EBP complex	CC	2	1	0.0249724847340275	1
GO:0030307	positive regulation of cell growth	BP	156	7	0.0254271377084779	1
GO:0001655	urogenital system development	BP	316	12	0.0256427056524657	1
GO:0070233	negative regulation of T cell apoptotic process	BP	19	2	0.0256598113437457	1
GO:0016579	protein deubiquitination	BP	269	9	0.0257128816893274	1
GO:0032989	cellular component morphogenesis	BP	1016	30	0.0257270035815446	1
GO:0140014	mitotic nuclear division	BP	253	9	0.0259070126303762	1
GO:0009235	cobalamin metabolic process	BP	21	2	0.0259302029733563	1
GO:0031253	cell projection membrane	CC	312	11	0.0262379617417906	1
GO:0031344	regulation of cell projection organization	BP	571	19	0.026246262716026	1
GO:0048390	intermediate mesoderm morphogenesis	BP	1	1	0.0263461895654528	1
GO:0048391	intermediate mesoderm formation	BP	1	1	0.0263461895654528	1
GO:0048392	intermediate mesodermal cell differentiation	BP	1	1	0.0263461895654528	1
GO:0055018	regulation of cardiac muscle fiber development	BP	1	1	0.0263461895654528	1
GO:0055020	positive regulation of cardiac muscle fiber development	BP	1	1	0.0263461895654528	1
GO:0060503	bud dilation involved in lung branching	BP	1	1	0.0263461895654528	1
GO:0061149	BMP signaling pathway involved in ureter morphogenesis	BP	1	1	0.0263461895654528	1
GO:0061150	renal system segmentation	BP	1	1	0.0263461895654528	1
GO:0061151	BMP signaling pathway involved in renal system segmentation	BP	1	1	0.0263461895654528	1
GO:0061155	pulmonary artery endothelial tube morphogenesis	BP	1	1	0.0263461895654528	1
GO:0061216	regulation of transcription from RNA polymerase II promoter involved in mesonephros development	BP	1	1	0.0263461895654528	1
GO:0071893	BMP signaling pathway involved in nephric duct formation	BP	1	1	0.0263461895654528	1
GO:0072096	negative regulation of branch elongation involved in ureteric bud branching	BP	1	1	0.0263461895654528	1
GO:0072097	negative regulation of branch elongation involved in ureteric bud branching by BMP signaling pathway	BP	1	1	0.0263461895654528	1
GO:0072099	anterior/posterior pattern specification involved in ureteric bud development	BP	1	1	0.0263461895654528	1
GO:0072100	specification of ureteric bud anterior/posterior symmetry	BP	1	1	0.0263461895654528	1
GO:0072101	specification of ureteric bud anterior/posterior symmetry by BMP signaling pathway	BP	1	1	0.0263461895654528	1
GO:0072192	ureter epithelial cell differentiation	BP	1	1	0.0263461895654528	1
GO:0072200	negative regulation of mesenchymal cell proliferation involved in ureter development	BP	1	1	0.0263461895654528	1
GO:1901964	positive regulation of cell proliferation involved in outflow tract morphogenesis	BP	1	1	0.0263461895654528	1
GO:2000004	regulation of metanephric S-shaped body morphogenesis	BP	1	1	0.0263461895654528	1
GO:2000005	negative regulation of metanephric S-shaped body morphogenesis	BP	1	1	0.0263461895654528	1
GO:2000006	regulation of metanephric comma-shaped body morphogenesis	BP	1	1	0.0263461895654528	1
GO:2000007	negative regulation of metanephric comma-shaped body morphogenesis	BP	1	1	0.0263461895654528	1
GO:0051145	smooth muscle cell differentiation	BP	64	4	0.0264899972828357	1
GO:0051961	negative regulation of nervous system development	BP	266	11	0.0265154036613975	1
GO:0048593	camera-type eye morphogenesis	BP	108	6	0.0265714948324077	1
GO:0045031	ATP-activated adenosine receptor activity	MF	2	1	0.0267935074379154	1
GO:0031945	positive regulation of glucocorticoid metabolic process	BP	1	1	0.0271217978212503	1
GO:0031948	positive regulation of glucocorticoid biosynthetic process	BP	1	1	0.0271217978212503	1
GO:0061369	negative regulation of testicular blood vessel morphogenesis	BP	1	1	0.0271217978212503	1
GO:2000019	negative regulation of male gonad development	BP	1	1	0.0271217978212503	1
GO:2000066	positive regulation of cortisol biosynthetic process	BP	1	1	0.0271217978212503	1
GO:0050771	negative regulation of axonogenesis	BP	51	4	0.0272168162033655	1
GO:0071796	K6-linked polyubiquitin modification-dependent protein binding	MF	2	1	0.0272729530144352	1
GO:0007045	cell-substrate adherens junction assembly	BP	73	5	0.027572641924388	1
GO:0048041	focal adhesion assembly	BP	73	5	0.027572641924388	1
GO:0072001	renal system development	BP	280	11	0.0276573621695042	1
GO:2000211	regulation of glutamate metabolic process	BP	2	1	0.0276726777828174	1
GO:0021903	rostrocaudal neural tube patterning	BP	12	2	0.0277989759313027	1
GO:0030516	regulation of axon extension	BP	76	5	0.0278392878568065	1
GO:0030205	dermatan sulfate metabolic process	BP	13	2	0.0280211968037435	1
GO:0043227	membrane-bounded organelle	CC	11948	203	0.0280366895092645	1
GO:0051093	negative regulation of developmental process	BP	878	24	0.0281506388795089	1
GO:0010720	positive regulation of cell development	BP	480	16	0.0285133883686765	1
GO:0021602	cranial nerve morphogenesis	BP	28	3	0.0286463002323079	1
GO:1900108	negative regulation of nodal signaling pathway	BP	3	1	0.0287383205391749	1
GO:0061098	positive regulation of protein tyrosine kinase activity	BP	41	3	0.028773072554895	1
GO:1902766	skeletal muscle satellite cell migration	BP	2	1	0.0292054053666509	1
GO:0045202	synapse	CC	835	25	0.0292426710282226	1
GO:0004464	leukotriene-C4 synthase activity	MF	3	1	0.0292559928839525	1
GO:0044446	intracellular organelle part	CC	8655	154	0.0292713344280451	1
GO:0000354	cis assembly of pre-catalytic spliceosome	BP	2	1	0.029342732149646	1
GO:2000107	negative regulation of leukocyte apoptotic process	BP	45	3	0.029483661921971	1
GO:0001944	vasculature development	BP	664	19	0.0294843930698597	1
GO:0007399	nervous system development	BP	2217	56	0.029491704635591	1
GO:0032231	regulation of actin filament bundle assembly	BP	87	5	0.0296342596672454	1
GO:0030863	cortical cytoskeleton	CC	84	5	0.0296849055833499	1
GO:0001228	transcriptional activator activity, RNA polymerase II transcription regulatory region sequence-specific binding	MF	406	14	0.0299302718294044	1
GO:0044236	multicellular organism metabolic process	BP	149	6	0.0302869059618937	1
GO:0022008	neurogenesis	BP	1467	40	0.0304523483887662	1
GO:0000987	core promoter proximal region sequence-specific DNA binding	MF	373	13	0.0304880500870981	1
GO:0097359	UDP-glucosylation	BP	2	1	0.0307129887008848	1
GO:0003980	UDP-glucose:glycoprotein glucosyltransferase activity	MF	2	1	0.0307129887008848	1
GO:0021570	rhombomere 4 development	BP	2	1	0.0307466618823033	1
GO:1905863	invadopodium organization	BP	2	1	0.0308826498841841	1
GO:0048688	negative regulation of sprouting of injured axon	BP	1	1	0.0309180724492123	1
GO:0048692	negative regulation of axon extension involved in regeneration	BP	1	1	0.0309180724492123	1
GO:0006424	glutamyl-tRNA aminoacylation	BP	2	1	0.0310716521191933	1
GO:0004818	glutamate-tRNA ligase activity	MF	2	1	0.0310716521191933	1
GO:0048699	generation of neurons	BP	1373	38	0.0311082926140372	1
GO:0048518	positive regulation of biological process	BP	5466	107	0.0311210924603133	1
GO:0031038	myosin II filament organization	BP	1	1	0.031487646717244	1
GO:0043519	regulation of myosin II filament organization	BP	1	1	0.031487646717244	1
GO:2000725	regulation of cardiac muscle cell differentiation	BP	43	3	0.0316145090794296	1
GO:0097117	guanylate kinase-associated protein clustering	BP	1	1	0.0317621390151221	1
GO:0050789	regulation of biological process	BP	10914	186	0.0319439854508119	1
GO:0032587	ruffle membrane	CC	88	5	0.0323115060356125	1
GO:0019008	molybdopterin synthase complex	CC	2	1	0.0323169905140624	1
GO:0021978	telencephalon regionalization	BP	13	2	0.0323591384352371	1
GO:0098794	postsynapse	CC	423	15	0.032533760360119	1
GO:0070646	protein modification by small protein removal	BP	284	9	0.0325908780521246	1
GO:2000113	negative regulation of cellular macromolecule biosynthetic process	BP	1532	35	0.0326835330658893	1
GO:0001159	core promoter proximal region DNA binding	MF	376	13	0.032773077926885	1
GO:0098631	cell adhesion mediator activity	MF	38	3	0.0328356938662258	1
GO:1990442	intrinsic apoptotic signaling pathway in response to nitrosative stress	BP	3	1	0.0330246037978519	1
GO:0044452	nucleolar part	CC	176	7	0.0330454353482303	1
GO:0030501	positive regulation of bone mineralization	BP	35	3	0.0331243228906467	1
GO:0030864	cortical actin cytoskeleton	CC	58	4	0.0331471188342198	1
GO:0044089	positive regulation of cellular component biogenesis	BP	486	15	0.0332160708636948	1
GO:0005856	cytoskeleton	CC	2027	45	0.0333386695454192	1
GO:0043234	protein complex	CC	3064	63	0.033415238765013	1
GO:0060060	post-embryonic retina morphogenesis in camera-type eye	BP	1	1	0.0334264865522947	1
GO:0070593	dendrite self-avoidance	BP	1	1	0.0334264865522947	1
GO:0050651	dermatan sulfate proteoglycan biosynthetic process	BP	15	2	0.0335588559899387	1
GO:0072178	nephric duct morphogenesis	BP	12	2	0.0336376036612301	1
GO:0005109	frizzled binding	MF	36	3	0.0338139895800638	1
GO:1990423	RZZ complex	CC	3	1	0.0338542829712809	1
GO:0097051	establishment of protein localization to endoplasmic reticulum membrane	BP	3	1	0.0339409303562127	1
GO:0044378	non-sequence-specific DNA binding, bending	MF	2	1	0.0341100935592195	1
GO:1990256	signal clustering	BP	1	1	0.0341202530608917	1
GO:0072358	cardiovascular system development	BP	672	19	0.0342198222415824	1
GO:0048640	negative regulation of developmental growth	BP	84	5	0.0344928282015367	1
GO:0010710	regulation of collagen catabolic process	BP	3	1	0.0345909802753127	1
GO:0031143	pseudopodium	CC	16	2	0.034955288091979	1
GO:0045160	myosin I complex	CC	1	1	0.0349921848045585	1
GO:0001754	eye photoreceptor cell differentiation	BP	42	3	0.0351609378535325	1
GO:1903182	regulation of SUMO transferase activity	BP	1	1	0.0352669547911472	1
GO:1903755	positive regulation of SUMO transferase activity	BP	1	1	0.0352669547911472	1
GO:1990356	sumoylated E2 ligase complex	CC	1	1	0.0352669547911472	1
GO:0061656	SUMO conjugating enzyme activity	MF	1	1	0.0352669547911472	1
GO:0035645	enteric smooth muscle cell differentiation	BP	1	1	0.0354422385857713	1
GO:0031345	negative regulation of cell projection organization	BP	150	7	0.0355076331581343	1
GO:0060219	camera-type eye photoreceptor cell differentiation	BP	17	2	0.0355368991322817	1
GO:1905123	regulation of glucosylceramidase activity	BP	2	1	0.0355391027344602	1
GO:0010494	cytoplasmic stress granule	CC	43	3	0.0355513669412129	1
GO:1905332	positive regulation of morphogenesis of an epithelium	BP	34	3	0.0356313164633784	1
GO:0031346	positive regulation of cell projection organization	BP	330	12	0.0356490715667198	1
GO:1905671	regulation of lysosome organization	BP	3	1	0.0359708904547437	1
GO:0003756	protein disulfide isomerase activity	MF	20	2	0.0360879202020105	1
GO:0016864	intramolecular oxidoreductase activity, transposing S-S bonds	MF	20	2	0.0360879202020105	1
GO:0005730	nucleolus	CC	913	22	0.0361191641168302	1
GO:0070242	thymocyte apoptotic process	BP	17	2	0.0362208864139517	1
GO:0048522	positive regulation of cellular process	BP	4873	97	0.0362813438178265	1
GO:0051966	regulation of synaptic transmission, glutamatergic	BP	59	4	0.0362858763551067	1
GO:0014835	myoblast differentiation involved in skeletal muscle regeneration	BP	2	1	0.0365262482944129	1
GO:0036461	BLOC-2 complex binding	MF	2	1	0.0365391340324438	1
GO:0003723	RNA binding	MF	1724	35	0.0366083117709921	1
GO:0045666	positive regulation of neuron differentiation	BP	324	12	0.0366265226443014	1
GO:0008285	negative regulation of cell proliferation	BP	697	19	0.0366300551981533	1
GO:0045785	positive regulation of cell adhesion	BP	386	12	0.0367932262859151	1
GO:0007626	locomotory behavior	BP	191	8	0.0368773788842354	1
GO:1900746	regulation of vascular endothelial growth factor signaling pathway	BP	16	2	0.0369011028972279	1
GO:0021592	fourth ventricle development	BP	1	1	0.0370207616644394	1
GO:0021993	initiation of neural tube closure	BP	1	1	0.0370207616644394	1
GO:0006309	apoptotic DNA fragmentation	BP	20	2	0.0370212867596505	1
GO:2000225	negative regulation of testosterone biosynthetic process	BP	2	1	0.037029572630825	1
GO:0070478	nuclear-transcribed mRNA catabolic process, 3'-5' exonucleolytic nonsense-mediated decay	BP	1	1	0.0371169087062756	1
GO:0031325	positive regulation of cellular metabolic process	BP	3008	64	0.0371351650183891	1
GO:0008446	GDP-mannose 4,6-dehydratase activity	MF	1	1	0.0372239312921179	1
GO:0003338	metanephros morphogenesis	BP	33	3	0.0372576633133351	1
GO:0034474	U2 snRNA 3'-end processing	BP	1	1	0.0375132943164114	1
GO:0031644	regulation of neurological system process	BP	71	4	0.0375361928376828	1
GO:1905032	negative regulation of membrane repolarization during cardiac muscle cell action potential	BP	6	1	0.0376300173027522	1
GO:0030275	LRR domain binding	MF	17	2	0.0376323216969765	1
GO:0002488	antigen processing and presentation of endogenous peptide antigen via MHC class Ib via ER pathway	BP	1	1	0.0378459977539142	1
GO:0002489	antigen processing and presentation of endogenous peptide antigen via MHC class Ib via ER pathway, TAP-dependent	BP	1	1	0.0378459977539142	1
GO:0046980	tapasin binding	MF	1	1	0.0378459977539142	1
GO:0003322	pancreatic A cell development	BP	1	1	0.0378941700449021	1
GO:0021905	forebrain-midbrain boundary formation	BP	1	1	0.0378941700449021	1
GO:0021917	somatic motor neuron fate commitment	BP	1	1	0.0378941700449021	1
GO:0021918	regulation of transcription from RNA polymerase II promoter involved in somatic motor neuron fate commitment	BP	1	1	0.0378941700449021	1
GO:1904861	excitatory synapse assembly	BP	10	2	0.0379481185574932	1
GO:0051270	regulation of cellular component movement	BP	881	23	0.0380764031550701	1
GO:0070169	positive regulation of biomineral tissue development	BP	40	3	0.0380776301898566	1
GO:0003908	methylated-DNA-[protein]-cysteine S-methyltransferase activity	MF	1	1	0.038368517015643	1
GO:0072044	collecting duct development	BP	13	2	0.038390649449506	1
GO:0035691	macrophage migration inhibitory factor signaling pathway	BP	2	1	0.0384730961814788	1
GO:0006566	threonine metabolic process	BP	2	1	0.0385114293420111	1
GO:0006567	threonine catabolic process	BP	2	1	0.0385114293420111	1
GO:0019518	L-threonine catabolic process to glycine	BP	2	1	0.0385114293420111	1
GO:0030490	maturation of SSU-rRNA	BP	52	3	0.0385296460282398	1
GO:0048514	blood vessel morphogenesis	BP	552	16	0.0385720076313218	1
GO:0016459	myosin complex	CC	71	4	0.038629958191381	1
GO:0003130	BMP signaling pathway involved in heart induction	BP	2	1	0.0388294383465049	1
GO:0003133	endodermal-mesodermal cell signaling	BP	2	1	0.0388294383465049	1
GO:0003134	endodermal-mesodermal cell signaling involved in heart induction	BP	2	1	0.0388294383465049	1
GO:0007620	copulation	BP	20	2	0.0390418184145923	1
GO:0050769	positive regulation of neurogenesis	BP	406	14	0.0390526746539601	1
GO:0034455	t-UTP complex	CC	3	1	0.0391443564005511	1
GO:0035089	establishment of apical/basal cell polarity	BP	17	2	0.0391994543240245	1
GO:0006909	phagocytosis	BP	220	8	0.0393016607341977	1
GO:0045178	basal part of cell	CC	47	3	0.0394240960922982	1
GO:0002043	blood vessel endothelial cell proliferation involved in sprouting angiogenesis	BP	19	2	0.0394707807600206	1
GO:2000242	negative regulation of reproductive process	BP	54	3	0.0395331162866633	1
GO:0005793	endoplasmic reticulum-Golgi intermediate compartment	CC	111	5	0.0395784746947432	1
GO:0003014	renal system process	BP	110	5	0.0396143746389518	1
GO:0070489	T cell aggregation	BP	2	1	0.0400836331084989	1
GO:1901963	regulation of cell proliferation involved in outflow tract morphogenesis	BP	2	1	0.0401377241003372	1
GO:1990837	sequence-specific double-stranded DNA binding	MF	723	21	0.0402466076750531	1
GO:0002719	negative regulation of cytokine production involved in immune response	BP	23	2	0.0403178385772593	1
GO:0016807	cysteine-type carboxypeptidase activity	MF	3	1	0.0403254124044661	1
GO:0070004	cysteine-type exopeptidase activity	MF	3	1	0.0403254124044661	1
GO:0031334	positive regulation of protein complex assembly	BP	228	8	0.0403298882541899	1
GO:0006939	smooth muscle contraction	BP	104	5	0.0404223991844715	1
GO:0010901	regulation of very-low-density lipoprotein particle remodeling	BP	5	1	0.0407059792486447	1
GO:2000224	regulation of testosterone biosynthetic process	BP	3	1	0.0408581286337621	1
GO:0050655	dermatan sulfate proteoglycan metabolic process	BP	16	2	0.0412080188757614	1
GO:1902547	regulation of cellular response to vascular endothelial growth factor stimulus	BP	17	2	0.041333213493593	1
GO:0045013	carbon catabolite repression of transcription	BP	2	1	0.0415046883157348	1
GO:0045014	negative regulation of transcription by glucose	BP	2	1	0.0415046883157348	1
GO:0032764	negative regulation of mast cell cytokine production	BP	2	1	0.0415829775049385	1
GO:1990622	CHOP-ATF3 complex	CC	2	1	0.0416694010747521	1
GO:0061000	negative regulation of dendritic spine development	BP	12	2	0.041770214893487	1
GO:0045214	sarcomere organization	BP	45	3	0.0419430717954789	1
GO:0070080	titin Z domain binding	MF	2	1	0.0422843164210008	1
GO:0040037	negative regulation of fibroblast growth factor receptor signaling pathway	BP	17	2	0.0423705190286885	1
GO:0072189	ureter development	BP	13	2	0.0424411601610063	1
GO:0050805	negative regulation of synaptic transmission	BP	72	4	0.0426348971437056	1
GO:0005925	focal adhesion	CC	392	13	0.0426390615373866	1
GO:0030855	epithelial cell differentiation	BP	724	17	0.042663139148984	1
GO:0050654	chondroitin sulfate proteoglycan metabolic process	BP	42	3	0.0432097968706649	1
GO:2000137	negative regulation of cell proliferation involved in heart morphogenesis	BP	3	1	0.0432759004849123	1
GO:0072673	lamellipodium morphogenesis	BP	17	2	0.0437244144216918	1
GO:0004307	ethanolaminephosphotransferase activity	MF	3	1	0.0438790067425219	1
GO:0005924	cell-substrate adherens junction	CC	395	13	0.0439070098662122	1
GO:0001726	ruffle	CC	162	7	0.0440967793409218	1
GO:1905314	semi-lunar valve development	BP	16	2	0.0441288336449192	1
GO:0032425	positive regulation of mismatch repair	BP	2	1	0.0442558150904399	1
GO:0008113	peptide-methionine (S)-S-oxide reductase activity	MF	2	1	0.0444387904820355	1
GO:0060044	negative regulation of cardiac muscle cell proliferation	BP	18	2	0.0444884697288045	1
GO:0070401	NADP+ binding	MF	2	1	0.0446311835929105	1
GO:0043555	regulation of translation in response to stress	BP	21	2	0.0447353101830012	1
GO:0000902	cell morphogenesis	BP	918	27	0.0447670280829533	1
GO:0097325	melanocyte proliferation	BP	2	1	0.0448671232470224	1
GO:0032835	glomerulus development	BP	63	4	0.0450550613886891	1
GO:0086097	phospholipase C-activating angiotensin-activated signaling pathway	BP	2	1	0.0452040751854379	1
GO:0034333	adherens junction assembly	BP	83	5	0.0453600088189586	1
GO:0072176	nephric duct development	BP	15	2	0.0454358159918292	1
GO:0008038	neuron recognition	BP	32	3	0.0454798144709398	1
GO:0006824	cobalt ion transport	BP	5	1	0.045543803297439	1
GO:0003179	heart valve morphogenesis	BP	35	3	0.0455952719102293	1
GO:0048389	intermediate mesoderm development	BP	2	1	0.0455994202159726	1
GO:0061227	pattern specification involved in mesonephros development	BP	2	1	0.0455994202159726	1
GO:0072098	anterior/posterior pattern specification involved in kidney development	BP	2	1	0.0455994202159726	1
GO:0060977	coronary vasculature morphogenesis	BP	17	2	0.0459699766796953	1
GO:2000152	regulation of ubiquitin-specific protease activity	BP	4	1	0.0460760401299699	1
GO:0001938	positive regulation of endothelial cell proliferation	BP	79	4	0.0460903388305025	1
GO:0017171	serine hydrolase activity	MF	202	6	0.046383516842889	1
GO:0071953	elastic fiber	CC	4	1	0.0464165048113633	1
GO:0070228	regulation of lymphocyte apoptotic process	BP	53	3	0.0465694709708187	1
GO:0032967	positive regulation of collagen biosynthetic process	BP	23	2	0.0468620211166682	1
GO:0060994	regulation of transcription from RNA polymerase II promoter involved in kidney development	BP	2	1	0.0468982902348111	1
GO:0071800	podosome assembly	BP	19	2	0.046913937254117	1
GO:0005634	nucleus	CC	6850	124	0.0470802287197602	1
GO:0048285	organelle fission	BP	432	12	0.047126149190052	1
GO:0032273	positive regulation of protein polymerization	BP	113	5	0.0471547104806639	1
GO:0002433	immune response-regulating cell surface receptor signaling pathway involved in phagocytosis	BP	73	4	0.0472495204201293	1
GO:0038096	Fc-gamma receptor signaling pathway involved in phagocytosis	BP	73	4	0.0472495204201293	1
GO:0030237	female sex determination	BP	2	1	0.0474069459278385	1
GO:0046968	peptide antigen transport	BP	3	1	0.0476158814800803	1
GO:0061323	cell proliferation involved in heart morphogenesis	BP	17	2	0.0477154527392666	1
GO:2000136	regulation of cell proliferation involved in heart morphogenesis	BP	17	2	0.0477561531293507	1
GO:0072534	perineuronal net	CC	2	1	0.0478071599410434	1
GO:1901842	negative regulation of high voltage-gated calcium channel activity	BP	4	1	0.0479601874164442	1
GO:0006208	pyrimidine nucleobase catabolic process	BP	3	1	0.0480442492071486	1
GO:0006210	thymine catabolic process	BP	3	1	0.0480442492071486	1
GO:0019859	thymine metabolic process	BP	3	1	0.0480442492071486	1
GO:0000280	nuclear division	BP	388	11	0.0482694368821209	1
GO:0033743	peptide-methionine (R)-S-oxide reductase activity	MF	4	1	0.0483187394815888	1
GO:0051173	positive regulation of nitrogen compound metabolic process	BP	2898	61	0.0483261384252131	1
GO:0051885	positive regulation of timing of anagen	BP	2	1	0.0483434973174519	1
GO:0010714	positive regulation of collagen metabolic process	BP	24	2	0.0483694578996394	1
GO:0044253	positive regulation of multicellular organismal metabolic process	BP	24	2	0.0483694578996394	1
GO:0030055	cell-substrate junction	CC	400	13	0.048545604301738	1
GO:0048014	Tie signaling pathway	BP	3	1	0.0485461591645505	1
GO:0003924	GTPase activity	MF	275	8	0.0486010745395875	1
GO:1903464	negative regulation of mitotic cell cycle DNA replication	BP	2	1	0.0488912292433409	1
GO:0070358	actin polymerization-dependent cell motility	BP	3	1	0.049101326462592	1
GO:0086100	endothelin receptor signaling pathway	BP	2	1	0.0491218472011958	1
GO:0004962	endothelin receptor activity	MF	2	1	0.0491218472011958	1
GO:0014859	negative regulation of skeletal muscle cell proliferation	BP	3	1	0.0491831101713901	1
GO:1902723	negative regulation of skeletal muscle satellite cell proliferation	BP	3	1	0.0491831101713901	1
GO:0005635	nuclear envelope	CC	431	12	0.0493203705699236	1
GO:0061387	regulation of extent of cell growth	BP	89	5	0.0493750381433232	1
GO:2000015	regulation of determination of dorsal identity	BP	4	1	0.0495033901531526	1
GO:0016202	regulation of striated muscle tissue development	BP	141	6	0.0495381208291889	1
GO:0042351	'de novo' GDP-L-fucose biosynthetic process	BP	2	1	0.0496082678381945	1
GO:0035990	tendon cell differentiation	BP	3	1	0.0498001540554741	1
GO:0035992	tendon formation	BP	3	1	0.0498001540554741	1
GO:0061162	establishment of monopolar cell polarity	BP	19	2	0.0498362142415831	1
GO:0050678	regulation of epithelial cell proliferation	BP	307	10	0.0498787762144618	1
GO:0019706	protein-cysteine S-palmitoyltransferase activity	MF	26	2	0.0499357113253204	1
GO:0019707	protein-cysteine S-acyltransferase activity	MF	26	2	0.0499357113253204	1
GO:0016667	oxidoreductase activity, acting on a sulfur group of donors	MF	57	3	0.0499925282428813	1

## Sheet: KEGG control - persistent
	Pathway	N genes in pathway	N genes p < 10-3 in pathway	p-value	FDR-adjusted p-value
path:hsa05217	Basal cell carcinoma	63	6	0.0155869	1
path:hsa05205	Proteoglycans in cancer	201	13	0.0223141	1
path:hsa04150	mTOR signaling pathway	153	10	0.0258688	1
path:hsa04950	Maturity onset diabetes of the young	26	3	0.0266552	1
path:hsa04141	Protein processing in endoplasmic reticulum	165	9	0.0309733	1
path:hsa04390	Hippo signaling pathway	154	10	0.0494555	1

## Sheet: GO - Callous
	Term	Class	N genes in GO term	N genes p < 10-3 in GO term	p-value	FDR-adjusted p-value
GO:1903209	positive regulation of oxidative stress-induced cell death	BP	16	4	0.0005097	1
GO:1900407	regulation of cellular response to oxidative stress	BP	82	9	0.000659392	1
GO:0000139	Golgi membrane	CC	700	41	0.000766671	1
GO:1900409	positive regulation of cellular response to oxidative stress	BP	18	4	0.000839891	1
GO:0042542	response to hydrogen peroxide	BP	134	12	0.00086937	1
GO:0046826	negative regulation of protein export from nucleus	BP	7	3	0.000959246	1
GO:0071356	cellular response to tumor necrosis factor	BP	276	18	0.000993859	1
GO:0010421	hydrogen peroxide-mediated programmed cell death	BP	15	4	0.00102591	1
GO:0097468	programmed cell death in response to reactive oxygen species	BP	15	4	0.00102591	1
GO:0030619	U1 snRNA binding	MF	7	3	0.00133567	1
GO:1902884	positive regulation of response to oxidative stress	BP	20	4	0.00139568	1
GO:0031403	lithium ion binding	MF	2	2	0.00141359	1
GO:0035019	somatic stem cell population maintenance	BP	73	9	0.00144121	1
GO:0036473	cell death in response to oxidative stress	BP	89	9	0.00145065	1
GO:0070301	cellular response to hydrogen peroxide	BP	91	9	0.00181873	1
GO:1902882	regulation of response to oxidative stress	BP	91	9	0.001827	1
GO:0034612	response to tumor necrosis factor	BP	294	18	0.00210608	1
GO:0044093	positive regulation of molecular function	BP	1750	84	0.00224249	1
GO:0098791	Golgi subcompartment	CC	785	43	0.00235957	1
GO:0036474	cell death in response to hydrogen peroxide	BP	34	5	0.00265188	1
GO:0045342	MHC class II biosynthetic process	BP	13	3	0.00272845	1
GO:0048012	hepatocyte growth factor receptor signaling pathway	BP	16	4	0.00324594	1
GO:0042301	phosphate ion binding	MF	11	3	0.0034467	1
GO:0090596	sensory organ morphogenesis	BP	250	19	0.00372484	1
GO:0018022	peptidyl-lysine methylation	BP	115	11	0.0040209	1
GO:0050650	chondroitin sulfate proteoglycan biosynthetic process	BP	29	5	0.00414249	1
GO:0008276	protein methyltransferase activity	MF	88	9	0.00415216	1
GO:1903201	regulation of oxidative stress-induced cell death	BP	73	7	0.00415465	1
GO:0034599	cellular response to oxidative stress	BP	282	18	0.00418744	1
GO:0031672	A band	CC	44	6	0.00419368	1
GO:0019827	stem cell population maintenance	BP	155	13	0.00427517	1
GO:0015433	peptide antigen-transporting ATPase activity	MF	2	2	0.00437862	1
GO:0006979	response to oxidative stress	BP	425	24	0.00453132	1
GO:0034614	cellular response to reactive oxygen species	BP	156	12	0.00454236	1
GO:0016831	carboxy-lyase activity	MF	35	5	0.00468154	1
GO:0098727	maintenance of cell number	BP	157	13	0.00469459	1
GO:0002479	antigen processing and presentation of exogenous peptide antigen via MHC class I, TAP-dependent	BP	74	7	0.0048828	1
GO:1903223	positive regulation of oxidative stress-induced neuron death	BP	4	2	0.00501917	1
GO:0031420	alkali metal ion binding	MF	20	4	0.00519595	1
GO:0045084	positive regulation of interleukin-12 biosynthetic process	BP	6	2	0.00537927	1
GO:0045335	phagocytic vesicle	CC	103	9	0.00539681	1
GO:0042590	antigen processing and presentation of exogenous peptide antigen via MHC class I	BP	77	7	0.00580383	1
GO:1901298	regulation of hydrogen peroxide-mediated programmed cell death	BP	13	3	0.00598538	1
GO:0009786	regulation of asymmetric cell division	BP	4	2	0.00606276	1
GO:2000111	positive regulation of macrophage apoptotic process	BP	3	2	0.00611302	1
GO:0043094	cellular metabolic compound salvage	BP	36	5	0.00629528	1
GO:0005859	muscle myosin complex	CC	27	4	0.00653999	1
GO:0009612	response to mechanical stimulus	BP	209	15	0.0067135	1
GO:1905330	regulation of morphogenesis of an epithelium	BP	180	14	0.00673693	1
GO:0019882	antigen processing and presentation	BP	219	14	0.00679065	1
GO:0030670	phagocytic vesicle membrane	CC	70	7	0.00704056	1
GO:0046102	inosine metabolic process	BP	4	2	0.00709926	1
GO:0003824	catalytic activity	MF	5682	212	0.00715485	1
GO:0006574	valine catabolic process	BP	4	2	0.00726197	1
GO:0034770	histone H4-K20 methylation	BP	10	3	0.00736157	1
GO:0016279	protein-lysine N-methyltransferase activity	MF	60	7	0.00747254	1
GO:0051347	positive regulation of transferase activity	BP	684	37	0.00779463	1
GO:0016278	lysine N-methyltransferase activity	MF	61	7	0.00790078	1
GO:2000467	positive regulation of glycogen (starch) synthase activity	BP	4	2	0.00832405	1
GO:0004470	malic enzyme activity	MF	4	2	0.0083799	1
GO:0006479	protein methylation	BP	175	13	0.00842944	1
GO:0008213	protein alkylation	BP	175	13	0.00842944	1
GO:0000712	resolution of meiotic recombination intermediates	BP	13	3	0.008758	1
GO:0048002	antigen processing and presentation of peptide antigen	BP	184	12	0.00955016	1
GO:0000302	response to reactive oxygen species	BP	218	14	0.0095677	1
GO:1901031	regulation of response to reactive oxygen species	BP	43	5	0.00972997	1
GO:1902225	negative regulation of acrosome reaction	BP	1	1	0.00983652	1
GO:1902202	regulation of hepatocyte growth factor receptor signaling pathway	BP	4	2	0.0098781	1
GO:0046923	ER retention sequence binding	MF	5	2	0.0100813	1
GO:0045348	positive regulation of MHC class II biosynthetic process	BP	8	2	0.0101122	1
GO:0031581	hemidesmosome assembly	BP	11	3	0.0102268	1
GO:0030865	cortical cytoskeleton organization	BP	34	5	0.0104092	1
GO:0044431	Golgi apparatus part	CC	914	45	0.0106013	1
GO:0006807	nitrogen compound metabolic process	BP	9880	333	0.0106321	1
GO:0051287	NAD binding	MF	56	6	0.0107912	1
GO:1902177	positive regulation of oxidative stress-induced intrinsic apoptotic signaling pathway	BP	6	2	0.0108401	1
GO:0035356	cellular triglyceride homeostasis	BP	7	2	0.0108821	1
GO:0001736	establishment of planar polarity	BP	122	10	0.0109188	1
GO:0007164	establishment of tissue polarity	BP	122	10	0.0109188	1
GO:0005795	Golgi stack	CC	127	10	0.0109522	1
GO:0033674	positive regulation of kinase activity	BP	547	31	0.0109581	1
GO:0051091	positive regulation of DNA binding transcription factor activity	BP	245	16	0.0111313	1
GO:1903205	regulation of hydrogen peroxide-induced cell death	BP	32	4	0.011294	1
GO:1902035	positive regulation of hematopoietic stem cell proliferation	BP	5	2	0.0113277	1
GO:0008310	single-stranded DNA 3'-5' exodeoxyribonuclease activity	MF	5	2	0.0118961	1
GO:0007214	gamma-aminobutyric acid signaling pathway	BP	24	4	0.0119273	1
GO:0016046	detection of fungus	BP	1	1	0.0120777	1
GO:0070430	positive regulation of nucleotide-binding oligomerization domain containing 1 signaling pathway	BP	1	1	0.0120777	1
GO:0007184	SMAD protein import into nucleus	BP	23	4	0.0122337	1
GO:0060742	epithelial cell differentiation involved in prostate gland development	BP	12	3	0.0122503	1
GO:0051302	regulation of cell division	BP	140	10	0.012273	1
GO:0000792	heterochromatin	CC	73	7	0.0122884	1
GO:0008152	metabolic process	BP	11224	373	0.0122975	1
GO:2000736	regulation of stem cell differentiation	BP	137	10	0.0123376	1
GO:0042825	TAP complex	CC	3	2	0.0124092	1
GO:0005280	hydrogen:amino acid symporter activity	MF	6	2	0.0124265	1
GO:0030206	chondroitin sulfate biosynthetic process	BP	24	4	0.0125495	1
GO:0060525	prostate glandular acinus development	BP	11	3	0.012617	1
GO:0006489	dolichyl diphosphate biosynthetic process	BP	7	2	0.0127048	1
GO:0046465	dolichyl diphosphate metabolic process	BP	7	2	0.0127048	1
GO:0060528	secretory columnal luminar epithelial cell differentiation involved in prostate glandular acinus development	BP	4	2	0.0127855	1
GO:0046469	platelet activating factor metabolic process	BP	6	2	0.0127969	1
GO:0048104	establishment of body hair or bristle planar orientation	BP	4	2	0.0129254	1
GO:0048105	establishment of body hair planar orientation	BP	4	2	0.0129254	1
GO:0048407	platelet-derived growth factor binding	MF	11	3	0.013106	1
GO:0071364	cellular response to epidermal growth factor stimulus	BP	38	5	0.0131805	1
GO:0044769	ATPase activity, coupled to transmembrane movement of ions, rotational mechanism	MF	34	4	0.0133793	1
GO:0038028	insulin receptor signaling pathway via phosphatidylinositol 3-kinase	BP	4	2	0.0133942	1
GO:0001654	eye development	BP	343	22	0.0134279	1
GO:0071688	striated muscle myosin thick filament assembly	BP	13	3	0.0134754	1
GO:0050706	regulation of interleukin-1 beta secretion	BP	40	4	0.0135143	1
GO:0042287	MHC protein binding	MF	30	4	0.0135483	1
GO:0048592	eye morphogenesis	BP	145	12	0.0136112	1
GO:0030620	U2 snRNA binding	MF	6	2	0.0137217	1
GO:0032435	negative regulation of proteasomal ubiquitin-dependent protein catabolic process	BP	28	4	0.013869	1
GO:0045860	positive regulation of protein kinase activity	BP	514	29	0.0139181	1
GO:0009234	menaquinone biosynthetic process	BP	1	1	0.0140116	1
GO:0032194	ubiquinone biosynthetic process via 3,4-dihydroxy-5-polyprenylbenzoate	BP	1	1	0.0140116	1
GO:0042371	vitamin K biosynthetic process	BP	1	1	0.0140116	1
GO:1901700	response to oxygen-containing compound	BP	1527	66	0.0140372	1
GO:0043085	positive regulation of catalytic activity	BP	1423	66	0.0141429	1
GO:0006029	proteoglycan metabolic process	BP	83	8	0.014272	1
GO:0005793	endoplasmic reticulum-Golgi intermediate compartment	CC	114	9	0.0143518	1
GO:0044237	cellular metabolic process	BP	10513	352	0.0145641	1
GO:0022851	GABA-gated chloride ion channel activity	MF	5	2	0.0147106	1
GO:0035729	cellular response to hepatocyte growth factor stimulus	BP	15	3	0.0147463	1
GO:0097150	neuronal stem cell population maintenance	BP	22	4	0.0148306	1
GO:0006488	dolichol-linked oligosaccharide biosynthetic process	BP	20	3	0.0148973	1
GO:0031034	myosin filament assembly	BP	14	3	0.0152989	1
GO:0042007	interleukin-18 binding	MF	1	1	0.0153417	1
GO:0006346	methylation-dependent chromatin silencing	BP	16	3	0.0153649	1
GO:0002009	morphogenesis of an epithelium	BP	521	30	0.0153772	1
GO:0005586	collagen type III trimer	CC	1	1	0.0154864	1
GO:0002474	antigen processing and presentation of peptide antigen via MHC class I	BP	93	7	0.0155336	1
GO:0008286	insulin receptor signaling pathway	BP	121	10	0.0155685	1
GO:0012505	endomembrane system	CC	4232	162	0.0156347	1
GO:1902711	GABA-A receptor complex	CC	17	3	0.015655	1
GO:0098588	bounding membrane of organelle	CC	1971	83	0.0156918	1
GO:0042116	macrophage activation	BP	65	6	0.015875	1
GO:0043101	purine-containing compound salvage	BP	16	3	0.0159172	1
GO:0071704	organic substance metabolic process	BP	10758	358	0.01594	1
GO:0008047	enzyme activator activity	MF	498	28	0.0161001	1
GO:1901509	regulation of endothelial tube morphogenesis	BP	5	2	0.0162046	1
GO:0051262	protein tetramerization	BP	144	10	0.0162494	1
GO:0071902	positive regulation of protein serine/threonine kinase activity	BP	349	21	0.016292	1
GO:0050704	regulation of interleukin-1 secretion	BP	43	4	0.0164221	1
GO:0051307	meiotic chromosome separation	BP	17	3	0.0164911	1
GO:0006290	pyrimidine dimer repair	BP	7	2	0.0168756	1
GO:0098974	postsynaptic actin cytoskeleton organization	BP	1	1	0.0172069	1
GO:0098918	structural constituent of synapse	MF	1	1	0.0172069	1
GO:0098973	structural constituent of postsynaptic actin cytoskeleton	MF	1	1	0.0172069	1
GO:0070412	R-SMAD binding	MF	23	4	0.0172253	1
GO:0042824	MHC class I peptide loading complex	CC	4	2	0.0172789	1
GO:0090090	negative regulation of canonical Wnt signaling pathway	BP	168	12	0.0173066	1
GO:0008170	N-methyltransferase activity	MF	93	8	0.0173417	1
GO:0021540	corpus callosum morphogenesis	BP	5	2	0.0173873	1
GO:0007585	respiratory gaseous exchange	BP	65	6	0.0175001	1
GO:0048863	stem cell differentiation	BP	257	16	0.0176996	1
GO:0030955	potassium ion binding	MF	15	3	0.0177394	1
GO:0051294	establishment of spindle orientation	BP	26	4	0.0177746	1
GO:0005794	Golgi apparatus	CC	1446	66	0.0178564	1
GO:0006490	oligosaccharide-lipid intermediate biosynthetic process	BP	21	3	0.017908	1
GO:0021568	rhombomere 2 development	BP	1	1	0.0179669	1
GO:0070849	response to epidermal growth factor	BP	42	5	0.0180188	1
GO:1900078	positive regulation of cellular response to insulin stimulus	BP	27	4	0.0180213	1
GO:1901701	cellular response to oxygen-containing compound	BP	1015	48	0.0180958	1
GO:0072014	proximal tubule development	BP	6	2	0.0182333	1
GO:0034773	histone H4-K20 trimethylation	BP	6	2	0.0184001	1
GO:0035234	ectopic germ cell programmed cell death	BP	8	2	0.0185965	1
GO:0016830	carbon-carbon lyase activity	MF	51	5	0.018679	1
GO:0019884	antigen processing and presentation of exogenous antigen	BP	178	11	0.0187256	1
GO:0042799	histone methyltransferase activity (H4-K20 specific)	MF	5	2	0.0187531	1
GO:0002579	positive regulation of antigen processing and presentation	BP	9	2	0.0187556	1
GO:0050654	chondroitin sulfate proteoglycan metabolic process	BP	42	5	0.0189522	1
GO:0008631	intrinsic apoptotic signaling pathway in response to oxidative stress	BP	46	5	0.019103	1
GO:0006152	purine nucleoside catabolic process	BP	8	2	0.0192967	1
GO:0046130	purine ribonucleoside catabolic process	BP	8	2	0.0192967	1
GO:0016460	myosin II complex	CC	33	4	0.0193243	1
GO:0031033	myosin filament organization	BP	15	3	0.0193634	1
GO:0006148	inosine catabolic process	BP	1	1	0.0194428	1
GO:0006738	nicotinamide riboside catabolic process	BP	1	1	0.0194428	1
GO:0046495	nicotinamide riboside metabolic process	BP	1	1	0.0194428	1
GO:0070637	pyridine nucleoside metabolic process	BP	1	1	0.0194428	1
GO:0070638	pyridine nucleoside catabolic process	BP	1	1	0.0194428	1
GO:0003972	RNA ligase (ATP) activity	MF	1	1	0.0195091	1
GO:0008452	RNA ligase activity	MF	1	1	0.0195091	1
GO:0030091	protein repair	BP	7	2	0.019547	1
GO:0042288	MHC class I protein binding	MF	19	3	0.0196568	1
GO:0032757	positive regulation of interleukin-8 production	BP	45	4	0.0197186	1
GO:0102389	polyprenol reductase activity	MF	1	1	0.0198613	1
GO:0003729	mRNA binding	MF	339	14	0.0199083	1
GO:0015689	molybdate ion transport	BP	1	1	0.0200037	1
GO:0015098	molybdate ion transmembrane transporter activity	MF	1	1	0.0200037	1
GO:0090630	activation of GTPase activity	BP	83	8	0.0200233	1
GO:1990889	H4K20me3 modified histone binding	MF	1	1	0.0202407	1
GO:0046977	TAP binding	MF	4	2	0.0203933	1
GO:0046978	TAP1 binding	MF	4	2	0.0203933	1
GO:0043754	dihydrolipoyllysine-residue (2-methylpropanoyl)transferase activity	MF	1	1	0.0204151	1
GO:0033560	folate reductase activity	MF	1	1	0.0204277	1
GO:0070391	response to lipoteichoic acid	BP	11	2	0.0207347	1
GO:0071223	cellular response to lipoteichoic acid	BP	11	2	0.0207347	1
GO:0036481	intrinsic apoptotic signaling pathway in response to hydrogen peroxide	BP	6	2	0.0208157	1
GO:0032677	regulation of interleukin-8 production	BP	63	5	0.020836	1
GO:0071541	eukaryotic translation initiation factor 3 complex, eIF3m	CC	7	2	0.0208681	1
GO:0043588	skin development	BP	406	17	0.0208717	1
GO:0042090	interleukin-12 biosynthetic process	BP	8	2	0.020893	1
GO:0045075	regulation of interleukin-12 biosynthetic process	BP	8	2	0.020893	1
GO:0016050	vesicle organization	BP	375	21	0.0209319	1
GO:0009083	branched-chain amino acid catabolic process	BP	20	3	0.0210114	1
GO:1902710	GABA receptor complex	CC	18	3	0.0210482	1
GO:0043010	camera-type eye development	BP	296	19	0.0210568	1
GO:1901876	regulation of calcium ion binding	BP	2	1	0.0214809	1
GO:1901877	negative regulation of calcium ion binding	BP	2	1	0.0214809	1
GO:0044065	regulation of respiratory system process	BP	16	3	0.021504	1
GO:0008297	single-stranded DNA exodeoxyribonuclease activity	MF	7	2	0.0218155	1
GO:0006108	malate metabolic process	BP	8	2	0.0218596	1
GO:0017024	myosin I binding	MF	1	1	0.0220108	1
GO:1901299	negative regulation of hydrogen peroxide-mediated programmed cell death	BP	8	2	0.0220262	1
GO:0004491	methylmalonate-semialdehyde dehydrogenase (acylating) activity	MF	1	1	0.0221569	1
GO:0018478	malonate-semialdehyde dehydrogenase (acetylating) activity	MF	1	1	0.0221569	1
GO:0001714	endodermal cell fate specification	BP	9	2	0.0222163	1
GO:0035728	response to hepatocyte growth factor	BP	17	3	0.022293	1
GO:0009127	purine nucleoside monophosphate biosynthetic process	BP	71	6	0.0222945	1
GO:0009168	purine ribonucleoside monophosphate biosynthetic process	BP	71	6	0.0222945	1
GO:0047874	dolichyldiphosphatase activity	MF	1	1	0.0223749	1
GO:0033177	proton-transporting two-sector ATPase complex, proton-transporting domain	CC	21	3	0.0223783	1
GO:0048037	cofactor binding	MF	263	15	0.0225585	1
GO:0004890	GABA-A receptor activity	MF	19	3	0.0226185	1
GO:1903025	regulation of RNA polymerase II regulatory region sequence-specific DNA binding	BP	10	2	0.0226979	1
GO:0015440	peptide-transporting ATPase activity	MF	4	2	0.022836	1
GO:0048839	inner ear development	BP	181	13	0.0231001	1
GO:0015739	sialic acid transport	BP	1	1	0.0232006	1
GO:0015136	sialic acid transmembrane transporter activity	MF	1	1	0.0232006	1
GO:0015538	sialic acid:proton symporter activity	MF	1	1	0.0232006	1
GO:0007423	sensory organ development	BP	520	29	0.023209	1
GO:1902033	regulation of hematopoietic stem cell proliferation	BP	9	2	0.0233162	1
GO:0032808	lacrimal gland development	BP	7	2	0.0234741	1
GO:0060322	head development	BP	713	39	0.0235131	1
GO:0045794	negative regulation of cell volume	BP	5	2	0.0235417	1
GO:0072235	metanephric distal tubule development	BP	7	2	0.0236135	1
GO:0006662	glycerol ether metabolic process	BP	11	2	0.0237442	1
GO:0008821	crossover junction endodeoxyribonuclease activity	MF	7	2	0.0237683	1
GO:0031930	mitochondria-nucleus signaling pathway	BP	1	1	0.0239026	1
GO:0007405	neuroblast proliferation	BP	55	6	0.0239392	1
GO:0050702	interleukin-1 beta secretion	BP	46	4	0.0239494	1
GO:2000142	regulation of DNA-templated transcription, initiation	BP	36	4	0.0239641	1
GO:0008757	S-adenosylmethionine-dependent methyltransferase activity	MF	151	10	0.0242421	1
GO:0001573	ganglioside metabolic process	BP	17	3	0.0243936	1
GO:0019725	cellular homeostasis	BP	883	39	0.0244351	1
GO:0004463	leukotriene-A4 hydrolase activity	MF	1	1	0.0245473	1
GO:0042249	establishment of planar polarity of embryonic epithelium	BP	17	3	0.0245576	1
GO:0022038	corpus callosum development	BP	15	3	0.0245587	1
GO:0005754	mitochondrial proton-transporting ATP synthase, catalytic core	CC	1	1	0.0245806	1
GO:0045267	proton-transporting ATP synthase, catalytic core	CC	1	1	0.0245806	1
GO:0006117	acetaldehyde metabolic process	BP	1	1	0.0247593	1
GO:0035525	NF-kappaB p50/p65 complex	CC	1	1	0.0247593	1
GO:0000137	Golgi cis cisterna	CC	7	2	0.0250333	1
GO:0036002	pre-mRNA binding	MF	35	4	0.0251562	1
GO:0045346	regulation of MHC class II biosynthetic process	BP	12	2	0.0255035	1
GO:0016886	ligase activity, forming phosphoric ester bonds	MF	9	2	0.0256555	1
GO:0048678	response to axon injury	BP	64	6	0.025735	1
GO:0017136	NAD-dependent histone deacetylase activity	MF	16	3	0.0257504	1
GO:1905636	positive regulation of RNA polymerase II regulatory region sequence-specific DNA binding	BP	1	1	0.0259899	1
GO:0046961	proton-transporting ATPase activity, rotational mechanism	MF	21	3	0.0259957	1
GO:0033034	positive regulation of myeloid cell apoptotic process	BP	8	2	0.0260506	1
GO:0006461	protein complex assembly	BP	1405	61	0.0261645	1
GO:0070271	protein complex biogenesis	BP	1405	61	0.0261645	1
GO:0006521	regulation of cellular amino acid metabolic process	BP	61	5	0.0264511	1
GO:0022891	substrate-specific transmembrane transporter activity	MF	935	43	0.0264548	1
GO:0034201	response to oleic acid	BP	5	2	0.026555	1
GO:0016615	malate dehydrogenase activity	MF	8	2	0.0265685	1
GO:0001678	cellular glucose homeostasis	BP	135	10	0.0267731	1
GO:2000465	regulation of glycogen (starch) synthase activity	BP	7	2	0.0267901	1
GO:1901033	positive regulation of response to reactive oxygen species	BP	10	2	0.0270244	1
GO:0016768	spermine synthase activity	MF	1	1	0.0271288	1
GO:0001738	morphogenesis of a polarized epithelium	BP	138	10	0.0271836	1
GO:0071788	endoplasmic reticulum tubular network maintenance	BP	1	1	0.0272527	1
GO:0018395	peptidyl-lysine hydroxylation to 5-hydroxy-L-lysine	BP	1	1	0.0277226	1
GO:0070077	histone arginine demethylation	BP	1	1	0.0277226	1
GO:0070078	histone H3-R2 demethylation	BP	1	1	0.0277226	1
GO:0070079	histone H4-R3 demethylation	BP	1	1	0.0277226	1
GO:0033746	histone demethylase activity (H3-R2 specific)	MF	1	1	0.0277226	1
GO:0033749	histone demethylase activity (H4-R3 specific)	MF	1	1	0.0277226	1
GO:0009206	purine ribonucleoside triphosphate biosynthetic process	BP	60	5	0.0277381	1
GO:0006343	establishment of chromatin silencing	BP	1	1	0.0277455	1
GO:0071441	negative regulation of histone H3-K14 acetylation	BP	1	1	0.0277455	1
GO:2000654	regulation of cellular response to testosterone stimulus	BP	1	1	0.0277455	1
GO:2000655	negative regulation of cellular response to testosterone stimulus	BP	1	1	0.0277455	1
GO:0007420	brain development	BP	676	37	0.0277596	1
GO:0015327	cystine:glutamate antiporter activity	MF	1	1	0.0277659	1
GO:0015328	cystine secondary active transmembrane transporter activity	MF	1	1	0.0277659	1
GO:1901680	sulfur-containing amino acid secondary active transmembrane transporter activity	MF	1	1	0.0277659	1
GO:0033234	negative regulation of protein sumoylation	BP	11	2	0.0277879	1
GO:0033233	regulation of protein sumoylation	BP	22	3	0.0277892	1
GO:0044085	cellular component biogenesis	BP	3033	119	0.0277991	1
GO:0008859	exoribonuclease II activity	MF	1	1	0.0279701	1
GO:0031984	organelle subcompartment	CC	1590	66	0.0281011	1
GO:0008021	synaptic vesicle	CC	151	11	0.0281839	1
GO:1990668	vesicle fusion with endoplasmic reticulum-Golgi intermediate compartment (ERGIC) membrane	BP	6	2	0.02845	1
GO:0090174	organelle membrane fusion	BP	156	11	0.0284987	1
GO:0034979	NAD-dependent protein deacetylase activity	MF	17	3	0.0285165	1
GO:0007417	central nervous system development	BP	899	47	0.0286414	1
GO:0071900	regulation of protein serine/threonine kinase activity	BP	494	26	0.0286956	1
GO:0032793	positive regulation of CREB transcription factor activity	BP	16	3	0.0287723	1
GO:0036442	hydrogen-exporting ATPase activity	MF	23	3	0.028855	1
GO:0034654	nucleobase-containing compound biosynthetic process	BP	4235	154	0.0289468	1
GO:0008296	3'-5'-exodeoxyribonuclease activity	MF	10	2	0.0289567	1
GO:0009950	dorsal/ventral axis specification	BP	16	3	0.0290118	1
GO:0019438	aromatic compound biosynthetic process	BP	4303	156	0.0290131	1
GO:0017065	single-strand selective uracil DNA N-glycosylase activity	MF	1	1	0.0291272	1
GO:0006348	chromatin silencing at telomere	BP	9	2	0.0291602	1
GO:0043583	ear development	BP	206	14	0.0292135	1
GO:0034983	peptidyl-lysine deacetylation	BP	7	2	0.0292802	1
GO:0002181	cytoplasmic translation	BP	63	5	0.0292904	1
GO:0034976	response to endoplasmic reticulum stress	BP	271	15	0.0294427	1
GO:0038131	neuregulin receptor activity	MF	1	1	0.0297362	1
GO:0016070	RNA metabolic process	BP	4590	164	0.0297368	1
GO:0018323	enzyme active site formation via L-cysteine sulfinic acid	BP	1	1	0.0302607	1
GO:0034309	primary alcohol biosynthetic process	BP	1	1	0.0302607	1
GO:0036471	cellular response to glyoxal	BP	1	1	0.0302607	1
GO:0036525	protein deglycation	BP	1	1	0.0302607	1
GO:0036526	peptidyl-cysteine deglycation	BP	1	1	0.0302607	1
GO:0036527	peptidyl-arginine deglycation	BP	1	1	0.0302607	1
GO:0036528	peptidyl-lysine deglycation	BP	1	1	0.0302607	1
GO:0036529	protein deglycation, glyoxal removal	BP	1	1	0.0302607	1
GO:0036530	protein deglycation, methylglyoxal removal	BP	1	1	0.0302607	1
GO:0036531	glutathione deglycation	BP	1	1	0.0302607	1
GO:0046295	glycolate biosynthetic process	BP	1	1	0.0302607	1
GO:0106044	guanine deglycation	BP	1	1	0.0302607	1
GO:0106045	guanine deglycation, methylglyoxal removal	BP	1	1	0.0302607	1
GO:0106046	guanine deglycation, glyoxal removal	BP	1	1	0.0302607	1
GO:0140041	cellular detoxification of methylglyoxal	BP	1	1	0.0302607	1
GO:1903072	regulation of death-inducing signaling complex assembly	BP	1	1	0.0302607	1
GO:1903073	negative regulation of death-inducing signaling complex assembly	BP	1	1	0.0302607	1
GO:1903167	regulation of pyrroline-5-carboxylate reductase activity	BP	1	1	0.0302607	1
GO:1903168	positive regulation of pyrroline-5-carboxylate reductase activity	BP	1	1	0.0302607	1
GO:1903176	regulation of tyrosine 3-monooxygenase activity	BP	1	1	0.0302607	1
GO:1903178	positive regulation of tyrosine 3-monooxygenase activity	BP	1	1	0.0302607	1
GO:1903184	L-dopa metabolic process	BP	1	1	0.0302607	1
GO:1903185	L-dopa biosynthetic process	BP	1	1	0.0302607	1
GO:1903189	glyoxal metabolic process	BP	1	1	0.0302607	1
GO:1903195	regulation of L-dopa biosynthetic process	BP	1	1	0.0302607	1
GO:1903197	positive regulation of L-dopa biosynthetic process	BP	1	1	0.0302607	1
GO:1903198	regulation of L-dopa decarboxylase activity	BP	1	1	0.0302607	1
GO:1903200	positive regulation of L-dopa decarboxylase activity	BP	1	1	0.0302607	1
GO:2000277	positive regulation of oxidative phosphorylation uncoupler activity	BP	1	1	0.0302607	1
GO:2000284	positive regulation of cellular amino acid biosynthetic process	BP	1	1	0.0302607	1
GO:0036470	tyrosine 3-monooxygenase activator activity	MF	1	1	0.0302607	1
GO:0036478	L-dopa decarboxylase activator activity	MF	1	1	0.0302607	1
GO:0036524	protein deglycase activity	MF	1	1	0.0302607	1
GO:0045340	mercury ion binding	MF	1	1	0.0302607	1
GO:0048593	camera-type eye morphogenesis	BP	109	9	0.0302684	1
GO:1901032	negative regulation of response to reactive oxygen species	BP	25	3	0.0304784	1
GO:1903206	negative regulation of hydrogen peroxide-induced cell death	BP	25	3	0.0304784	1
GO:0015985	energy coupled proton transport, down electrochemical gradient	BP	26	3	0.0305219	1
GO:0015986	ATP synthesis coupled proton transport	BP	26	3	0.0305219	1
GO:0030546	receptor activator activity	MF	15	3	0.0305814	1
GO:0008168	methyltransferase activity	MF	205	12	0.0306371	1
GO:0075522	IRES-dependent viral translational initiation	BP	10	2	0.0306678	1
GO:0043525	positive regulation of neuron apoptotic process	BP	49	5	0.0306928	1
GO:0003251	positive regulation of cell proliferation involved in heart valve morphogenesis	BP	1	1	0.0307229	1
GO:0061040	female gonad morphogenesis	BP	1	1	0.0307229	1
GO:1905304	regulation of cardiac myofibril assembly	BP	1	1	0.0307229	1
GO:1905305	negative regulation of cardiac myofibril assembly	BP	1	1	0.0307229	1
GO:0030616	transforming growth factor beta receptor, common-partner cytoplasmic mediator activity	MF	1	1	0.0307229	1
GO:0140096	catalytic activity, acting on a protein	MF	2226	93	0.0307672	1
GO:1902547	regulation of cellular response to vascular endothelial growth factor stimulus	BP	17	3	0.030787	1
GO:0032637	interleukin-8 production	BP	70	5	0.0308439	1
GO:0070717	poly-purine tract binding	MF	22	3	0.031069	1
GO:0015378	sodium:chloride symporter activity	MF	1	1	0.0311117	1
GO:1902018	negative regulation of cilium assembly	BP	8	2	0.031131	1
GO:0044446	intracellular organelle part	CC	8736	303	0.0311927	1
GO:0034418	urate biosynthetic process	BP	2	1	0.0312039	1
GO:2000738	positive regulation of stem cell differentiation	BP	17	3	0.0313117	1
GO:0007346	regulation of mitotic cell cycle	BP	666	32	0.0313357	1
GO:0016605	PML body	CC	96	8	0.0314013	1
GO:0030168	platelet activation	BP	157	11	0.0314325	1
GO:0006900	vesicle budding from membrane	BP	90	7	0.0314838	1
GO:0044260	cellular macromolecule metabolic process	BP	8524	288	0.0315283	1
GO:0090102	cochlea development	BP	46	5	0.0315485	1
GO:0005575	cellular_component	CC	17790	550	0.0317095	1
GO:0031090	organelle membrane	CC	2851	108	0.031791	1
GO:0001542	ovulation from ovarian follicle	BP	9	2	0.0319547	1
GO:0001530	lipopolysaccharide binding	MF	28	3	0.0319644	1
GO:0044422	organelle part	CC	8953	310	0.0319746	1
GO:0009145	purine nucleoside triphosphate biosynthetic process	BP	61	5	0.0319792	1
GO:0051338	regulation of transferase activity	BP	997	46	0.0320832	1
GO:0038046	enkephalin receptor activity	MF	1	1	0.0321543	1
GO:0009142	nucleoside triphosphate biosynthetic process	BP	76	6	0.0321593	1
GO:0051235	maintenance of location	BP	299	17	0.0321607	1
GO:0046570	methylthioribulose 1-phosphate dehydratase activity	MF	1	1	0.0321687	1
GO:0071949	FAD binding	MF	20	3	0.0321783	1
GO:0050701	interleukin-1 secretion	BP	50	4	0.0324921	1
GO:0032956	regulation of actin cytoskeleton organization	BP	290	18	0.0326359	1
GO:0051371	muscle alpha-actinin binding	MF	18	3	0.0326671	1
GO:0060359	response to ammonium ion	BP	122	9	0.03282	1
GO:0007216	G-protein coupled glutamate receptor signaling pathway	BP	14	3	0.0329603	1
GO:0031982	vesicle	CC	4218	152	0.0329877	1
GO:0002582	positive regulation of antigen processing and presentation of peptide or polysaccharide antigen via MHC class II	BP	2	1	0.032994	1
GO:0002585	positive regulation of antigen processing and presentation of peptide antigen	BP	2	1	0.032994	1
GO:0002588	positive regulation of antigen processing and presentation of peptide antigen via MHC class II	BP	2	1	0.032994	1
GO:0048568	embryonic organ development	BP	422	24	0.0332282	1
GO:0042472	inner ear morphogenesis	BP	95	8	0.0332313	1
GO:1901984	negative regulation of protein acetylation	BP	22	3	0.0332464	1
GO:0043491	protein kinase B signaling	BP	244	14	0.0333784	1
GO:0036302	atrioventricular canal development	BP	7	2	0.0337413	1
GO:0005168	neurotrophin TRKA receptor binding	MF	6	2	0.0337924	1
GO:0045655	regulation of monocyte differentiation	BP	18	3	0.0338715	1
GO:0051897	positive regulation of protein kinase B signaling	BP	151	10	0.0339106	1
GO:0030178	negative regulation of Wnt signaling pathway	BP	200	13	0.0339768	1
GO:0018130	heterocycle biosynthetic process	BP	4295	155	0.0340068	1
GO:0009233	menaquinone metabolic process	BP	3	1	0.0340846	1
GO:2000109	regulation of macrophage apoptotic process	BP	9	2	0.0342257	1
GO:0016889	endodeoxyribonuclease activity, producing 3'-phosphomonoesters	MF	10	2	0.0345664	1
GO:0006487	protein N-linked glycosylation	BP	72	6	0.0345948	1
GO:0015103	inorganic anion transmembrane transporter activity	MF	137	9	0.0346629	1
GO:0016499	orexin receptor activity	MF	2	1	0.0347225	1
GO:0021796	cerebral cortex regionalization	BP	7	2	0.0349628	1
GO:0002437	inflammatory response to antigenic stimulus	BP	43	4	0.0350293	1
GO:0002478	antigen processing and presentation of exogenous peptide antigen	BP	171	10	0.0351958	1
GO:0009081	branched-chain amino acid metabolic process	BP	23	3	0.035427	1
GO:0045870	positive regulation of single stranded viral RNA replication via double stranded DNA intermediate	BP	1	1	0.035603	1
GO:1905463	negative regulation of DNA duplex unwinding	BP	1	1	0.035603	1
GO:0019035	viral integration complex	CC	1	1	0.035603	1
GO:0019885	antigen processing and presentation of endogenous peptide antigen via MHC class I	BP	7	2	0.035727	1
GO:0030259	lipid glycosylation	BP	10	2	0.0359763	1
GO:0046332	SMAD binding	MF	74	7	0.0361571	1
GO:0030296	protein tyrosine kinase activator activity	MF	18	3	0.0362285	1
GO:1900076	regulation of cellular response to insulin stimulus	BP	67	6	0.0363451	1
GO:0002067	glandular epithelial cell differentiation	BP	47	5	0.0363566	1
GO:0007035	vacuolar acidification	BP	22	3	0.0364055	1
GO:0007169	transmembrane receptor protein tyrosine kinase signaling pathway	BP	694	36	0.03665	1
GO:0043170	macromolecule metabolic process	BP	9146	306	0.0367841	1
GO:0003977	UDP-N-acetylglucosamine diphosphorylase activity	MF	2	1	0.0369238	1
GO:0031338	regulation of vesicle fusion	BP	64	6	0.0369973	1
GO:0032970	regulation of actin filament-based process	BP	334	20	0.0370166	1
GO:0006338	chromatin remodeling	BP	163	10	0.0370602	1
GO:0008193	tRNA guanylyltransferase activity	MF	2	1	0.0370767	1
GO:0002475	antigen processing and presentation via MHC class Ib	BP	10	2	0.0371736	1
GO:0000502	proteasome complex	CC	66	5	0.0373313	1
GO:0000980	RNA polymerase II distal enhancer sequence-specific DNA binding	MF	71	6	0.0373381	1
GO:0060828	regulation of canonical Wnt signaling pathway	BP	248	15	0.037469	1
GO:0036480	neuron intrinsic apoptotic signaling pathway in response to oxidative stress	BP	8	2	0.037504	1
GO:1903376	regulation of oxidative stress-induced neuron intrinsic apoptotic signaling pathway	BP	8	2	0.037504	1
GO:0019774	proteasome core complex, beta-subunit complex	CC	11	2	0.0375535	1
GO:0008356	asymmetric cell division	BP	19	3	0.0376054	1
GO:0045657	positive regulation of monocyte differentiation	BP	9	2	0.0378687	1
GO:0009967	positive regulation of signal transduction	BP	1509	64	0.0379225	1
GO:0046825	regulation of protein export from nucleus	BP	39	4	0.0381348	1
GO:0001934	positive regulation of protein phosphorylation	BP	944	42	0.0382583	1
GO:0046626	regulation of insulin receptor signaling pathway	BP	49	5	0.038282	1
GO:1901564	organonitrogen compound metabolic process	BP	6755	232	0.0384754	1
GO:1901362	organic cyclic compound biosynthetic process	BP	4446	159	0.0385852	1
GO:0060071	Wnt signaling pathway, planar cell polarity pathway	BP	110	8	0.0385887	1
GO:1900370	positive regulation of RNA interference	BP	1	1	0.0386304	1
GO:0120033	negative regulation of plasma membrane bounded cell projection assembly	BP	22	3	0.0387006	1
GO:0006876	cellular cadmium ion homeostasis	BP	1	1	0.0387279	1
GO:0015707	nitrite transport	BP	1	1	0.0387279	1
GO:0044249	cellular biosynthetic process	BP	6256	213	0.0387812	1
GO:0042595	behavioral response to starvation	BP	2	1	0.0388221	1
GO:0055089	fatty acid homeostasis	BP	13	2	0.0388685	1
GO:0097525	spliceosomal snRNP complex	CC	61	5	0.0390159	1
GO:0097493	structural molecule activity conferring elasticity	MF	17	3	0.0391598	1
GO:0038178	complement component C5a signaling pathway	BP	2	1	0.0391609	1
GO:0004878	complement component C5a receptor activity	MF	2	1	0.0391609	1
GO:0046525	xylosylprotein 4-beta-galactosyltransferase activity	MF	1	1	0.0391666	1
GO:1905369	endopeptidase complex	CC	67	5	0.0391787	1
GO:0031490	chromatin DNA binding	MF	101	7	0.0393231	1
GO:0072089	stem cell proliferation	BP	116	9	0.0393346	1
GO:0060592	mammary gland formation	BP	7	2	0.0397125	1
GO:0033140	negative regulation of peptidyl-serine phosphorylation of STAT protein	BP	2	1	0.0397314	1
GO:0070932	histone H3 deacetylation	BP	21	3	0.0397856	1
GO:0047860	diiodophenylpyruvate reductase activity	MF	1	1	0.0397945	1
GO:0098773	skin epidermis development	BP	89	7	0.0398114	1
GO:0071559	response to transforming growth factor beta	BP	224	14	0.0398561	1
GO:0031597	cytosolic proteasome complex	CC	12	2	0.0399501	1
GO:0016917	GABA receptor activity	MF	22	3	0.0401258	1
GO:0090175	regulation of establishment of planar polarity	BP	112	8	0.040262	1
GO:0009156	ribonucleoside monophosphate biosynthetic process	BP	83	6	0.0403534	1
GO:0004146	dihydrofolate reductase activity	MF	2	1	0.0404655	1
GO:0071316	cellular response to nicotine	BP	8	2	0.0406126	1
GO:0030295	protein kinase activator activity	MF	73	6	0.0409012	1
GO:0016469	proton-transporting two-sector ATPase complex	CC	50	4	0.0409738	1
GO:0072282	metanephric nephron tubule morphogenesis	BP	8	2	0.041058	1
GO:0061351	neural precursor cell proliferation	BP	134	10	0.0412082	1
GO:0070914	UV-damage excision repair	BP	11	2	0.0414197	1
GO:0010586	miRNA metabolic process	BP	23	3	0.0414639	1
GO:1903203	regulation of oxidative stress-induced neuron death	BP	22	3	0.0414964	1
GO:0048525	negative regulation of viral process	BP	91	6	0.0415924	1
GO:2000774	positive regulation of cellular senescence	BP	11	2	0.0419841	1
GO:0016671	oxidoreductase activity, acting on a sulfur group of donors, disulfide as acceptor	MF	13	2	0.0420903	1
GO:0035853	chromosome passenger complex localization to spindle midzone	BP	1	1	0.0422683	1
GO:0044449	contractile fiber part	CC	209	13	0.0422721	1
GO:1903051	negative regulation of proteolysis involved in cellular protein catabolic process	BP	57	5	0.0422885	1
GO:0022607	cellular component assembly	BP	2773	110	0.0423292	1
GO:0005590	collagen type VII trimer	CC	1	1	0.0424305	1
GO:0098648	collagen anchoring fibril	CC	1	1	0.0424305	1
GO:0098652	collagen type VII anchoring fibril	CC	1	1	0.0424305	1
GO:0032090	Pyrin domain binding	MF	2	1	0.0424839	1
GO:0015108	chloride transmembrane transporter activity	MF	94	7	0.0425957	1
GO:1901193	regulation of formation of translation preinitiation complex	BP	1	1	0.0426834	1
GO:1901194	negative regulation of formation of translation preinitiation complex	BP	1	1	0.0426834	1
GO:1904689	negative regulation of cytoplasmic translational initiation	BP	1	1	0.0426834	1
GO:0003700	DNA binding transcription factor activity	MF	1218	51	0.0427084	1
GO:0021762	substantia nigra development	BP	39	4	0.0430136	1
GO:0090176	microtubule cytoskeleton organization involved in establishment of planar polarity	BP	1	1	0.0430881	1
GO:0016741	transferase activity, transferring one-carbon groups	MF	216	12	0.0431503	1
GO:0036475	neuron death in response to oxidative stress	BP	23	3	0.0432457	1
GO:0036085	GDP-fucose import into Golgi lumen	BP	1	1	0.0432696	1
GO:0031227	intrinsic component of endoplasmic reticulum membrane	CC	145	9	0.0433355	1
GO:0046452	dihydrofolate metabolic process	BP	2	1	0.0433576	1
GO:0043087	regulation of GTPase activity	BP	462	26	0.0435488	1
GO:0009798	axis specification	BP	89	7	0.043707	1
GO:0009201	ribonucleoside triphosphate biosynthetic process	BP	65	5	0.0437075	1
GO:0015878	biotin transport	BP	1	1	0.0437365	1
GO:0015887	pantothenate transmembrane transport	BP	1	1	0.0437365	1
GO:0009205	purine ribonucleoside triphosphate metabolic process	BP	295	14	0.0438055	1
GO:1905258	regulation of nitrosative stress-induced intrinsic apoptotic signaling pathway	BP	2	1	0.0438607	1
GO:1905259	negative regulation of nitrosative stress-induced intrinsic apoptotic signaling pathway	BP	2	1	0.0438607	1
GO:0060041	retina development in camera-type eye	BP	138	10	0.0439246	1
GO:0004197	cysteine-type endopeptidase activity	MF	83	6	0.0439704	1
GO:0051870	methotrexate binding	MF	3	1	0.0440121	1
GO:0001763	morphogenesis of a branching structure	BP	193	13	0.0440441	1
GO:0032707	negative regulation of interleukin-23 production	BP	2	1	0.0440979	1
GO:0071822	protein complex subunit organization	BP	1648	67	0.044128	1
GO:0014807	regulation of somitogenesis	BP	9	2	0.0441566	1
GO:0016095	polyprenol catabolic process	BP	3	1	0.044218	1
GO:0003947	(N-acetylneuraminyl)-galactosylglucosylceramide N-acetylgalactosaminyltransferase activity	MF	1	1	0.0442466	1
GO:0034968	histone lysine methylation	BP	103	8	0.0442673	1
GO:0045454	cell redox homeostasis	BP	72	5	0.0442695	1
GO:0036255	response to methylamine	BP	1	1	0.0443074	1
GO:1903442	response to lipoic acid	BP	1	1	0.0443074	1
GO:0004375	glycine dehydrogenase (decarboxylating) activity	MF	1	1	0.0443074	1
GO:0016642	oxidoreductase activity, acting on the CH-NH2 group of donors, disulfide as acceptor	MF	1	1	0.0443074	1
GO:0070280	pyridoxal binding	MF	1	1	0.0443074	1
GO:0021688	cerebellar molecular layer formation	BP	1	1	0.0443256	1
GO:0060853	Notch signaling pathway involved in arterial endothelial cell fate commitment	BP	1	1	0.0443256	1
GO:0000132	establishment of mitotic spindle orientation	BP	21	3	0.0443652	1
GO:0008237	metallopeptidase activity	MF	185	11	0.0444896	1
GO:0034660	ncRNA metabolic process	BP	567	23	0.0445339	1
GO:0071420	cellular response to histamine	BP	8	2	0.0445654	1
GO:0071888	macrophage apoptotic process	BP	11	2	0.0445873	1
GO:0033500	carbohydrate homeostasis	BP	217	13	0.0450202	1
GO:0042593	glucose homeostasis	BP	217	13	0.0450202	1
GO:0032648	regulation of interferon-beta production	BP	47	4	0.0452674	1
GO:0071837	HMG box domain binding	MF	18	3	0.0452716	1
GO:0031985	Golgi cisterna	CC	95	7	0.0453945	1
GO:0030297	transmembrane receptor protein tyrosine kinase activator activity	MF	7	2	0.0454154	1
GO:0070848	response to growth factor	BP	666	33	0.0455069	1
GO:0004731	purine-nucleoside phosphorylase activity	MF	2	1	0.0457378	1
GO:0042118	endothelial cell activation	BP	12	2	0.0457463	1
GO:0016320	endoplasmic reticulum membrane fusion	BP	2	1	0.0457953	1
GO:0030017	sarcomere	CC	192	12	0.0459111	1
GO:1902476	chloride transmembrane transport	BP	95	7	0.0459992	1
GO:1903122	negative regulation of TRAIL-activated apoptotic signaling pathway	BP	3	1	0.0463368	1
GO:0005677	chromatin silencing complex	CC	8	2	0.046505	1
GO:1990619	histone H3-K9 deacetylation	BP	2	1	0.0467202	1
GO:0032129	histone deacetylase activity (H3-K9 specific)	MF	2	1	0.0467202	1
GO:0046969	NAD-dependent histone deacetylase activity (H3-K9 specific)	MF	2	1	0.0467202	1
GO:1901576	organic substance biosynthetic process	BP	6354	215	0.046814	1
GO:0032029	myosin tail binding	MF	1	1	0.0469338	1
GO:0003229	ventricular cardiac muscle tissue development	BP	53	5	0.0471018	1
GO:0002483	antigen processing and presentation of endogenous peptide antigen	BP	8	2	0.0471111	1
GO:0006573	valine metabolic process	BP	9	2	0.04714	1
GO:0043414	macromolecule methylation	BP	286	15	0.0471902	1
GO:0001588	dopamine neurotransmitter receptor activity, coupled via Gs	MF	4	1	0.047282	1
GO:0050662	coenzyme binding	MF	184	11	0.0475229	1
GO:0048729	tissue morphogenesis	BP	626	32	0.0475771	1
GO:0010676	positive regulation of cellular carbohydrate metabolic process	BP	53	5	0.0475997	1
GO:0060687	regulation of branching involved in prostate gland morphogenesis	BP	7	2	0.0478573	1
GO:0030016	myofibril	CC	213	13	0.0480246	1
GO:0051722	protein C-terminal methylesterase activity	MF	1	1	0.0481697	1
GO:0051723	protein methylesterase activity	MF	1	1	0.0481697	1
GO:0033179	proton-transporting V-type ATPase, V0 domain	CC	10	2	0.048181	1
GO:0072205	metanephric collecting duct development	BP	8	2	0.0482666	1
GO:0034097	response to cytokine	BP	984	38	0.0484928	1
GO:0009058	biosynthetic process	BP	6423	217	0.0485276	1
GO:2000144	positive regulation of DNA-templated transcription, initiation	BP	27	3	0.0485401	1
GO:0000159	protein phosphatase type 2A complex	CC	20	3	0.0486347	1
GO:0030957	Tat protein binding	MF	10	2	0.0486983	1
GO:0008442	3-hydroxyisobutyrate dehydrogenase activity	MF	1	1	0.0487348	1
GO:0031401	positive regulation of protein modification process	BP	1200	51	0.0487623	1
GO:0018307	enzyme active site formation	BP	2	1	0.0489063	1
GO:1904680	peptide transmembrane transporter activity	MF	28	3	0.0489577	1
GO:0005167	neurotrophin TRK receptor binding	MF	7	2	0.0489859	1
GO:0000738	DNA catabolic process, exonucleolytic	BP	2	1	0.0492235	1
GO:0044281	small molecule metabolic process	BP	2141	79	0.0493293	1
GO:0006342	chromatin silencing	BP	107	6	0.0493714	1
GO:0065003	macromolecular complex assembly	BP	1767	70	0.0494976	1
GO:0031334	positive regulation of protein complex assembly	BP	229	13	0.049528	1
GO:0048854	brain morphogenesis	BP	34	4	0.0495924	1
GO:0070382	exocytic vesicle	CC	166	11	0.0498349	1
GO:0009100	glycoprotein metabolic process	BP	427	21	0.0498518	1
GO:0042327	positive regulation of phosphorylation	BP	987	43	0.0498789	1
GO:0043549	regulation of kinase activity	BP	834	39	0.0498893	1

## Sheet: KEGG - Callous
	Pathway	N genes in pathway	N genes p < 10-3 in pathway	p-value	FDR-adjusted p-value
path:hsa05120	Epithelial cell signaling in Helicobacter pylori infection	68	8	0.00245429	0.469377
path:hsa05132	Salmonella infection	85	8	0.00330274	0.469377
path:hsa04210	Apoptosis	135	11	0.00604705	0.469377
path:hsa00510	N-Glycan biosynthesis	49	6	0.00622083	0.469377
path:hsa00532	Glycosaminoglycan biosynthesis - chondroitin sulfate / dermatan sulfate	20	4	0.00711177	0.469377
path:hsa05133	Pertussis	76	6	0.0136509	0.750797
path:hsa04142	Lysosome	123	9	0.0207525	0.941329
path:hsa00604	Glycosphingolipid biosynthesis - ganglio series	15	3	0.0260013	0.941329
path:hsa03460	Fanconi anemia pathway	51	5	0.0267322	0.941329
path:hsa01524	Platinum drug resistance	73	6	0.030894	0.941329
path:hsa03050	Proteasome	45	4	0.0313776	0.941329
path:hsa01100	Metabolic pathways	1243	49	0.0389178	1
path:hsa05030	Cocaine addiction	49	5	0.0450779	1
path:hsa04390	Hippo signaling pathway	154	11	0.0492793	1

## Sheet: GO - Impulsivity
	Term	Class	N genes in GO term	N genes p < 10-3 in GO term	p-value	FDR-adjusted p-value
GO:0007613	memory	BP	106	13	0.000271982	1
GO:0007166	cell surface receptor signaling pathway	BP	2714	117	0.00126933	1
GO:0004016	adenylate cyclase activity	MF	10	4	0.00132221	1
GO:0017102	methionyl glutamyl tRNA synthetase complex	CC	2	2	0.00144682	1
GO:0015882	L-ascorbic acid transport	BP	2	2	0.00170256	1
GO:0070904	transepithelial L-ascorbic acid transport	BP	2	2	0.00170256	1
GO:0008520	L-ascorbate:sodium symporter activity	MF	2	2	0.00170256	1
GO:0015229	L-ascorbic acid transmembrane transporter activity	MF	2	2	0.00170256	1
GO:0070890	sodium-dependent L-ascorbate transmembrane transporter activity	MF	2	2	0.00170256	1
GO:0030425	dendrite	CC	495	34	0.00209643	1
GO:0060125	negative regulation of growth hormone secretion	BP	2	2	0.00210338	1
GO:0050896	response to stimulus	BP	8459	287	0.0021277	1
GO:0007190	activation of adenylate cyclase activity	BP	36	6	0.00216511	1
GO:0043197	dendritic spine	CC	134	14	0.0022621	1
GO:0044309	neuron spine	CC	136	14	0.00242052	1
GO:0006171	cAMP biosynthetic process	BP	132	11	0.00246303	1
GO:0007616	long-term memory	BP	33	6	0.00253212	1
GO:1900746	regulation of vascular endothelial growth factor signaling pathway	BP	16	4	0.00282967	1
GO:0032024	positive regulation of insulin secretion	BP	68	8	0.00283133	1
GO:0043271	negative regulation of ion transport	BP	140	11	0.00292379	1
GO:0032467	positive regulation of cytokinesis	BP	36	5	0.00322153	1
GO:0021587	cerebellum morphogenesis	BP	36	6	0.00353118	1
GO:0007267	cell-cell signaling	BP	1578	75	0.00402369	1
GO:1902547	regulation of cellular response to vascular endothelial growth factor stimulus	BP	17	4	0.00405143	1
GO:0032413	negative regulation of ion transmembrane transporter activity	BP	73	7	0.00424378	1
GO:0046887	positive regulation of hormone secretion	BP	118	10	0.00432673	1
GO:0007610	behavior	BP	575	33	0.00437004	1
GO:0007154	cell communication	BP	6288	226	0.00447104	1
GO:0030814	regulation of cAMP metabolic process	BP	146	11	0.00474085	1
GO:0036477	somatodendritic compartment	CC	693	41	0.00486414	1
GO:0009187	cyclic nucleotide metabolic process	BP	203	14	0.00494587	1
GO:0051716	cellular response to stimulus	BP	7063	245	0.00497794	1
GO:0002054	nucleobase binding	MF	4	2	0.00503984	1
GO:0010159	specification of animal organ position	BP	3	2	0.00518347	1
GO:0016556	mRNA modification	BP	16	3	0.00541914	1
GO:0021575	hindbrain morphogenesis	BP	40	6	0.00544206	1
GO:0030072	peptide hormone secretion	BP	242	17	0.005485	1
GO:0019852	L-ascorbic acid metabolic process	BP	11	3	0.00556505	1
GO:0046883	regulation of hormone secretion	BP	252	17	0.00570597	1
GO:0046058	cAMP metabolic process	BP	162	12	0.00573102	1
GO:0023052	signaling	BP	6268	225	0.00576725	1
GO:0006030	chitin metabolic process	BP	5	2	0.00594518	1
GO:0006032	chitin catabolic process	BP	5	2	0.00594518	1
GO:0004568	chitinase activity	MF	5	2	0.00594518	1
GO:0015630	microtubule cytoskeleton	CC	1103	54	0.00625035	1
GO:0052869	arachidonic acid omega-hydroxylase activity	MF	1	1	0.00642675	1
GO:0052872	tocotrienol omega-hydroxylase activity	MF	1	1	0.00642675	1
GO:0046879	hormone secretion	BP	298	19	0.00643439	1
GO:0030073	insulin secretion	BP	202	15	0.00646618	1
GO:0019860	uracil metabolic process	BP	3	2	0.00667117	1
GO:0021696	cerebellar cortex morphogenesis	BP	29	5	0.00683196	1
GO:0030817	regulation of cAMP biosynthetic process	BP	129	10	0.00683631	1
GO:0031543	peptidyl-proline dioxygenase activity	MF	13	3	0.00747347	1
GO:1904063	negative regulation of cation transmembrane transport	BP	82	7	0.00758104	1
GO:0021695	cerebellar cortex development	BP	45	6	0.00788042	1
GO:0032410	negative regulation of transporter activity	BP	81	7	0.00791864	1
GO:0033081	regulation of T cell differentiation in thymus	BP	23	4	0.00797209	1
GO:0007165	signal transduction	BP	5778	204	0.0079801	1
GO:0007187	G-protein coupled receptor signaling pathway, coupled to cyclic nucleotide second messenger	BP	181	12	0.00807772	1
GO:0005245	voltage-gated calcium channel activity	MF	39	6	0.00832349	1
GO:0019511	peptidyl-proline hydroxylation	BP	14	3	0.00846997	1
GO:0009914	hormone transport	BP	310	19	0.00847129	1
GO:0050917	sensory perception of umami taste	BP	6	2	0.00891708	1
GO:0016849	phosphorus-oxygen lyase activity	MF	22	4	0.00898821	1
GO:0050951	sensory perception of temperature stimulus	BP	21	4	0.00933356	1
GO:0045762	positive regulation of adenylate cyclase activity	BP	47	6	0.00942748	1
GO:0007611	learning or memory	BP	234	17	0.0095848	1
GO:0007188	adenylate cyclase-modulating G-protein coupled receptor signaling pathway	BP	154	11	0.00959048	1
GO:0052652	cyclic purine nucleotide metabolic process	BP	163	11	0.00964538	1
GO:0009190	cyclic nucleotide biosynthetic process	BP	164	11	0.00977093	1
GO:2000831	regulation of steroid hormone secretion	BP	18	3	0.00993597	1
GO:0009975	cyclase activity	MF	22	4	0.0100881	1
GO:0050796	regulation of insulin secretion	BP	171	13	0.0103376	1
GO:0018401	peptidyl-proline hydroxylation to 4-hydroxy-L-proline	BP	5	2	0.0103378	1
GO:0010494	cytoplasmic stress granule	CC	43	5	0.0104403	1
GO:0043539	protein serine/threonine kinase activator activity	MF	30	4	0.0104751	1
GO:0046068	cGMP metabolic process	BP	53	6	0.0106743	1
GO:0090277	positive regulation of peptide hormone secretion	BP	90	8	0.0108458	1
GO:0022407	regulation of cell-cell adhesion	BP	419	22	0.0109657	1
GO:1902747	negative regulation of lens fiber cell differentiation	BP	1	1	0.0110855	1
GO:0005307	choline:sodium symporter activity	MF	1	1	0.0113733	1
GO:1990635	proximal dendrite	CC	4	2	0.0115094	1
GO:0044459	plasma membrane part	CC	2602	107	0.0119218	1
GO:1901072	glucosamine-containing compound catabolic process	BP	8	2	0.0123261	1
GO:0051047	positive regulation of secretion	BP	383	20	0.0124128	1
GO:0042475	odontogenesis of dentin-containing tooth	BP	84	8	0.012731	1
GO:0015205	nucleobase transmembrane transporter activity	MF	7	2	0.0128081	1
GO:0060386	synapse assembly involved in innervation	BP	1	1	0.0128623	1
GO:0030322	stabilization of membrane potential	BP	16	3	0.0129006	1
GO:0070169	positive regulation of biomineral tissue development	BP	40	5	0.0129046	1
GO:1905404	positive regulation of activated CD8-positive, alpha-beta T cell apoptotic process	BP	1	1	0.0130096	1
GO:0007186	G-protein coupled receptor signaling pathway	BP	1275	40	0.0131236	1
GO:0090276	regulation of peptide hormone secretion	BP	200	14	0.013156	1
GO:0003008	system process	BP	1979	72	0.0131782	1
GO:0035935	androgen secretion	BP	1	1	0.0131891	1
GO:2000834	regulation of androgen secretion	BP	1	1	0.0131891	1
GO:2000836	positive regulation of androgen secretion	BP	1	1	0.0131891	1
GO:0097162	MADS box domain binding	MF	1	1	0.0131891	1
GO:0001650	fibrillar center	CC	128	10	0.0132489	1
GO:0007193	adenylate cyclase-inhibiting G-protein coupled receptor signaling pathway	BP	75	7	0.0133156	1
GO:0086056	voltage-gated calcium channel activity involved in AV node cell action potential	MF	3	2	0.0134039	1
GO:0035929	steroid hormone secretion	BP	21	3	0.0138585	1
GO:0043515	kinetochore binding	MF	5	2	0.0138732	1
GO:0008962	phosphatidylglycerophosphatase activity	MF	1	1	0.0138744	1
GO:0080009	mRNA methylation	BP	7	2	0.0141012	1
GO:0002055	adenine binding	MF	1	1	0.0142547	1
GO:0003999	adenine phosphoribosyltransferase activity	MF	1	1	0.0142547	1
GO:0030799	regulation of cyclic nucleotide metabolic process	BP	171	11	0.0143952	1
GO:0030819	positive regulation of cAMP biosynthetic process	BP	83	7	0.0147726	1
GO:0052870	tocopherol omega-hydroxylase activity	MF	2	1	0.0149466	1
GO:0052871	alpha-tocopherol omega-hydroxylase activity	MF	2	1	0.0149466	1
GO:0097258	20-hydroxy-leukotriene B4 omega oxidase activity	MF	2	1	0.0149466	1
GO:0097259	20-aldehyde-leukotriene B4 20-monooxygenase activity	MF	2	1	0.0149466	1
GO:2001257	regulation of cation channel activity	BP	151	11	0.0151117	1
GO:0015851	nucleobase transport	BP	8	2	0.0151264	1
GO:0050890	cognition	BP	270	18	0.0151817	1
GO:0030802	regulation of cyclic nucleotide biosynthetic process	BP	149	10	0.0155063	1
GO:0022841	potassium ion leak channel activity	MF	16	3	0.0155447	1
GO:0042361	menaquinone catabolic process	BP	2	1	0.0157132	1
GO:0042377	vitamin K catabolic process	BP	2	1	0.0157132	1
GO:1900747	negative regulation of vascular endothelial growth factor signaling pathway	BP	8	2	0.0158628	1
GO:0031290	retinal ganglion cell axon guidance	BP	21	4	0.0162981	1
GO:0033500	carbohydrate homeostasis	BP	217	14	0.0165965	1
GO:0042593	glucose homeostasis	BP	217	14	0.0165965	1
GO:0006776	vitamin A metabolic process	BP	9	2	0.016646	1
GO:0035238	vitamin A biosynthetic process	BP	1	1	0.0167028	1
GO:1901810	beta-carotene metabolic process	BP	1	1	0.0167028	1
GO:0003834	beta-carotene 15,15'-monooxygenase activity	MF	1	1	0.0167028	1
GO:0033699	DNA 5'-adenosine monophosphate hydrolase activity	MF	1	1	0.0167251	1
GO:0120108	DNA-3'-diphospho-5'-guanosine diphosphatase	MF	1	1	0.0167251	1
GO:0050152	omega-amidase activity	MF	1	1	0.0167984	1
GO:0034477	U6 snRNA 3'-end processing	BP	1	1	0.0169481	1
GO:0051725	protein de-ADP-ribosylation	BP	4	2	0.0173123	1
GO:0050808	synapse organization	BP	260	18	0.0176382	1
GO:0008061	chitin binding	MF	8	2	0.017864	1
GO:0009749	response to glucose	BP	180	12	0.0178973	1
GO:0019534	toxin transmembrane transporter activity	MF	5	2	0.0179202	1
GO:0003095	pressure natriuresis	BP	3	1	0.0182013	1
GO:0008093	cytoskeletal adaptor activity	MF	11	3	0.0183165	1
GO:0072498	embryonic skeletal joint development	BP	15	3	0.0184385	1
GO:0032825	positive regulation of natural killer cell differentiation	BP	6	2	0.0186324	1
GO:0034766	negative regulation of ion transmembrane transport	BP	92	7	0.0189105	1
GO:0005623	cell	CC	16068	489	0.0190159	1
GO:1903532	positive regulation of secretion by cell	BP	352	18	0.0193907	1
GO:0030816	positive regulation of cAMP metabolic process	BP	92	7	0.0195509	1
GO:0051747	cytosine C-5 DNA demethylase activity	MF	1	1	0.019591	1
GO:0048630	skeletal muscle tissue growth	BP	8	2	0.0196514	1
GO:0051349	positive regulation of lyase activity	BP	60	6	0.0200185	1
GO:0045761	regulation of adenylate cyclase activity	BP	81	7	0.0200272	1
GO:0097310	cap2 mRNA methylation	BP	1	1	0.0202805	1
GO:0051463	negative regulation of cortisol secretion	BP	1	1	0.020345	1
GO:0009746	response to hexose	BP	185	12	0.020386	1
GO:0050961	detection of temperature stimulus involved in sensory perception	BP	15	3	0.0204007	1
GO:0050965	detection of temperature stimulus involved in sensory perception of pain	BP	15	3	0.0204007	1
GO:0005886	plasma membrane	CC	5056	179	0.0204201	1
GO:0004853	uroporphyrinogen decarboxylase activity	MF	1	1	0.020477	1
GO:0030674	protein binding, bridging	MF	167	12	0.020621	1
GO:0007189	adenylate cyclase-activating G-protein coupled receptor signaling pathway	BP	65	6	0.0206934	1
GO:0005227	calcium activated cation channel activity	MF	30	4	0.0207455	1
GO:0060684	epithelial-mesenchymal cell signaling	BP	7	2	0.0209566	1
GO:0048518	positive regulation of biological process	BP	5520	200	0.0211544	1
GO:0031281	positive regulation of cyclase activity	BP	60	6	0.0213574	1
GO:0060390	regulation of SMAD protein import into nucleus	BP	16	3	0.0213926	1
GO:0005680	anaphase-promoting complex	CC	21	3	0.02145	1
GO:0050023	L-fuconate dehydratase activity	MF	1	1	0.0216762	1
GO:0016290	palmitoyl-CoA hydrolase activity	MF	11	2	0.0217262	1
GO:0044464	cell part	CC	16037	488	0.021734	1
GO:0060090	molecular adaptor activity	MF	184	13	0.0218138	1
GO:0033504	floor plate development	BP	7	2	0.0218541	1
GO:0051222	positive regulation of protein transport	BP	475	23	0.0221442	1
GO:0003997	acyl-CoA oxidase activity	MF	6	2	0.0222985	1
GO:0043228	non-membrane-bounded organelle	CC	3990	146	0.0223758	1
GO:0043232	intracellular non-membrane-bounded organelle	CC	3990	146	0.0223758	1
GO:1990825	sequence-specific mRNA binding	MF	10	2	0.0227499	1
GO:1902905	positive regulation of supramolecular fiber organization	BP	180	12	0.0227929	1
GO:0098655	cation transmembrane transport	BP	808	38	0.0231301	1
GO:0022409	positive regulation of cell-cell adhesion	BP	253	14	0.0234297	1
GO:0050863	regulation of T cell activation	BP	316	16	0.0234343	1
GO:0036004	GAF domain binding	MF	1	1	0.0234656	1
GO:1900371	regulation of purine nucleotide biosynthetic process	BP	159	10	0.023486	1
GO:2000849	regulation of glucocorticoid secretion	BP	9	2	0.023562	1
GO:0034284	response to monosaccharide	BP	190	12	0.0235844	1
GO:0035773	insulin secretion involved in cellular response to glucose stimulus	BP	59	6	0.023636	1
GO:0006026	aminoglycan catabolic process	BP	67	6	0.0237097	1
GO:0030808	regulation of nucleotide biosynthetic process	BP	160	10	0.0237888	1
GO:0071944	cell periphery	CC	5156	182	0.0238445	1
GO:0006168	adenine salvage	BP	2	1	0.0239469	1
GO:0046083	adenine metabolic process	BP	2	1	0.0239469	1
GO:0046084	adenine biosynthetic process	BP	2	1	0.0239469	1
GO:0007167	enzyme linked receptor protein signaling pathway	BP	995	48	0.0239609	1
GO:1990030	pericellular basket	CC	1	1	0.0239699	1
GO:0005261	cation channel activity	MF	312	19	0.0241758	1
GO:0007141	male meiosis I	BP	22	3	0.0244104	1
GO:0034763	negative regulation of transmembrane transport	BP	98	7	0.0244527	1
GO:0007169	transmembrane receptor protein tyrosine kinase signaling pathway	BP	694	36	0.0247643	1
GO:0006775	fat-soluble vitamin metabolic process	BP	42	4	0.0247723	1
GO:0051721	protein phosphatase 2A binding	MF	27	4	0.0250648	1
GO:0021675	nerve development	BP	73	7	0.0254028	1
GO:2000539	regulation of protein geranylgeranylation	BP	1	1	0.0254236	1
GO:2000541	positive regulation of protein geranylgeranylation	BP	1	1	0.0254236	1
GO:0022840	leak channel activity	MF	19	3	0.0255998	1
GO:0022842	narrow pore channel activity	MF	19	3	0.0255998	1
GO:0018685	alkane 1-monooxygenase activity	MF	4	1	0.0256161	1
GO:0070257	positive regulation of mucus secretion	BP	6	2	0.0257162	1
GO:0032049	cardiolipin biosynthetic process	BP	7	2	0.0258361	1
GO:0051482	positive regulation of cytosolic calcium ion concentration involved in phospholipase C-activating G-protein coupled signaling pathway	BP	27	3	0.0259181	1
GO:0035933	glucocorticoid secretion	BP	10	2	0.0259666	1
GO:0090482	vitamin transmembrane transporter activity	MF	7	2	0.0262341	1
GO:0007200	phospholipase C-activating G-protein coupled receptor signaling pathway	BP	111	7	0.0264288	1
GO:0070167	regulation of biomineral tissue development	BP	75	6	0.0264646	1
GO:0036100	leukotriene catabolic process	BP	4	1	0.0266203	1
GO:0036101	leukotriene B4 catabolic process	BP	4	1	0.0266203	1
GO:0036102	leukotriene B4 metabolic process	BP	4	1	0.0266203	1
GO:0050051	leukotriene-B4 20-monooxygenase activity	MF	4	1	0.0266203	1
GO:1902548	negative regulation of cellular response to vascular endothelial growth factor stimulus	BP	9	2	0.0266609	1
GO:0004584	dolichyl-phosphate-mannose-glycolipid alpha-mannosyltransferase activity	MF	1	1	0.0267273	1
GO:0061303	cornea development in camera-type eye	BP	8	2	0.0268243	1
GO:0000164	protein phosphatase type 1 complex	CC	12	2	0.0271839	1
GO:0090132	epithelium migration	BP	262	16	0.0271881	1
GO:0031545	peptidyl-proline 4-dioxygenase activity	MF	9	2	0.0272598	1
GO:1903530	regulation of secretion by cell	BP	661	30	0.0274105	1
GO:0009233	menaquinone metabolic process	BP	3	1	0.0275339	1
GO:0080154	regulation of fertilization	BP	29	3	0.0275847	1
GO:0051085	chaperone mediated protein folding requiring cofactor	BP	12	2	0.0276111	1
GO:0021602	cranial nerve morphogenesis	BP	28	4	0.0277097	1
GO:0033212	iron assimilation	BP	1	1	0.027712	1
GO:0033214	iron assimilation by chelation and transport	BP	1	1	0.027712	1
GO:1900159	positive regulation of bone mineralization involved in bone maturation	BP	1	1	0.027712	1
GO:2000308	negative regulation of tumor necrosis factor (ligand) superfamily member 11 production	BP	1	1	0.027712	1
GO:0021952	central nervous system projection neuron axonogenesis	BP	23	4	0.0281364	1
GO:0016287	glycerone-phosphate O-acyltransferase activity	MF	1	1	0.0282011	1
GO:0048027	mRNA 5'-UTR binding	MF	22	3	0.0284688	1
GO:0034644	cellular response to UV	BP	74	6	0.0285515	1
GO:0045178	basal part of cell	CC	47	5	0.0287295	1
GO:0048015	phosphatidylinositol-mediated signaling	BP	153	11	0.0289738	1
GO:0042374	phylloquinone metabolic process	BP	3	1	0.0291153	1
GO:0042376	phylloquinone catabolic process	BP	3	1	0.0291153	1
GO:1901662	quinone catabolic process	BP	3	1	0.0291153	1
GO:0030838	positive regulation of actin filament polymerization	BP	89	7	0.0291947	1
GO:0007528	neuromuscular junction development	BP	43	5	0.0291956	1
GO:0007284	spermatogonial cell division	BP	1	1	0.02927	1
GO:0060841	venous blood vessel development	BP	16	3	0.0293571	1
GO:0004114	3',5'-cyclic-nucleotide phosphodiesterase activity	MF	24	4	0.0294549	1
GO:0010070	zygote asymmetric cell division	BP	1	1	0.0294925	1
GO:2001258	negative regulation of cation channel activity	BP	50	4	0.0295872	1
GO:1905458	positive regulation of lymphoid progenitor cell differentiation	BP	1	1	0.0297047	1
GO:2000174	regulation of pro-T cell differentiation	BP	1	1	0.0297047	1
GO:2000176	positive regulation of pro-T cell differentiation	BP	1	1	0.0297047	1
GO:0000152	nuclear ubiquitin ligase complex	CC	40	4	0.0297953	1
GO:0110053	regulation of actin filament organization	BP	231	15	0.0298348	1
GO:0008074	guanylate cyclase complex, soluble	CC	17	3	0.0299033	1
GO:0004383	guanylate cyclase activity	MF	17	3	0.0299033	1
GO:0072671	mitochondria-associated ubiquitin-dependent protein catabolic process	BP	1	1	0.0300498	1
GO:0036266	Cdc48p-Npl4p-Vms1p AAA ATPase complex	CC	1	1	0.0300498	1
GO:0048390	intermediate mesoderm morphogenesis	BP	1	1	0.0302276	1
GO:0048391	intermediate mesoderm formation	BP	1	1	0.0302276	1
GO:0048392	intermediate mesodermal cell differentiation	BP	1	1	0.0302276	1
GO:0055018	regulation of cardiac muscle fiber development	BP	1	1	0.0302276	1
GO:0055020	positive regulation of cardiac muscle fiber development	BP	1	1	0.0302276	1
GO:0060503	bud dilation involved in lung branching	BP	1	1	0.0302276	1
GO:0061149	BMP signaling pathway involved in ureter morphogenesis	BP	1	1	0.0302276	1
GO:0061150	renal system segmentation	BP	1	1	0.0302276	1
GO:0061151	BMP signaling pathway involved in renal system segmentation	BP	1	1	0.0302276	1
GO:0061155	pulmonary artery endothelial tube morphogenesis	BP	1	1	0.0302276	1
GO:0061216	regulation of transcription from RNA polymerase II promoter involved in mesonephros development	BP	1	1	0.0302276	1
GO:0071893	BMP signaling pathway involved in nephric duct formation	BP	1	1	0.0302276	1
GO:0072096	negative regulation of branch elongation involved in ureteric bud branching	BP	1	1	0.0302276	1
GO:0072097	negative regulation of branch elongation involved in ureteric bud branching by BMP signaling pathway	BP	1	1	0.0302276	1
GO:0072099	anterior/posterior pattern specification involved in ureteric bud development	BP	1	1	0.0302276	1
GO:0072100	specification of ureteric bud anterior/posterior symmetry	BP	1	1	0.0302276	1
GO:0072101	specification of ureteric bud anterior/posterior symmetry by BMP signaling pathway	BP	1	1	0.0302276	1
GO:0072192	ureter epithelial cell differentiation	BP	1	1	0.0302276	1
GO:0072200	negative regulation of mesenchymal cell proliferation involved in ureter development	BP	1	1	0.0302276	1
GO:1901964	positive regulation of cell proliferation involved in outflow tract morphogenesis	BP	1	1	0.0302276	1
GO:2000004	regulation of metanephric S-shaped body morphogenesis	BP	1	1	0.0302276	1
GO:2000005	negative regulation of metanephric S-shaped body morphogenesis	BP	1	1	0.0302276	1
GO:2000006	regulation of metanephric comma-shaped body morphogenesis	BP	1	1	0.0302276	1
GO:2000007	negative regulation of metanephric comma-shaped body morphogenesis	BP	1	1	0.0302276	1
GO:0019088	immortalization of host cell by virus	BP	1	1	0.0302865	1
GO:0020021	immortalization of host cell	BP	1	1	0.0302865	1
GO:0004799	thymidylate synthase activity	MF	1	1	0.0302865	1
GO:0042083	5,10-methylenetetrahydrofolate-dependent methyltransferase activity	MF	1	1	0.0302865	1
GO:0007015	actin filament organization	BP	348	21	0.0304589	1
GO:0061036	positive regulation of cartilage development	BP	28	4	0.030501	1
GO:0019798	procollagen-proline dioxygenase activity	MF	7	2	0.0308673	1
GO:1900748	positive regulation of vascular endothelial growth factor signaling pathway	BP	5	2	0.0308911	1
GO:0033077	T cell differentiation in thymus	BP	68	6	0.0309026	1
GO:0051223	regulation of protein transport	BP	774	34	0.0312102	1
GO:0090130	tissue migration	BP	268	16	0.0314339	1
GO:0031418	L-ascorbic acid binding	MF	20	3	0.0315712	1
GO:0001552	ovarian follicle atresia	BP	1	1	0.0317065	1
GO:0007216	G-protein coupled glutamate receptor signaling pathway	BP	14	3	0.0317488	1
GO:0004112	cyclic-nucleotide phosphodiesterase activity	MF	25	4	0.0317521	1
GO:0051046	regulation of secretion	BP	720	32	0.0317555	1
GO:0030804	positive regulation of cyclic nucleotide biosynthetic process	BP	101	7	0.0322466	1
GO:0030690	Noc1p-Noc2p complex	CC	1	1	0.0322652	1
GO:0030691	Noc2p-Noc3p complex	CC	1	1	0.0322652	1
GO:0090087	regulation of peptide transport	BP	803	35	0.0323415	1
GO:0022610	biological adhesion	BP	1366	62	0.0324102	1
GO:0071890	bicarbonate binding	MF	1	1	0.0326461	1
GO:1905397	activated CD8-positive, alpha-beta T cell apoptotic process	BP	2	1	0.0327793	1
GO:1905402	regulation of activated CD8-positive, alpha-beta T cell apoptotic process	BP	2	1	0.0327793	1
GO:0050708	regulation of protein secretion	BP	417	20	0.0328114	1
GO:0030274	LIM domain binding	MF	7	2	0.0332257	1
GO:0008193	tRNA guanylyltransferase activity	MF	2	1	0.03325	1
GO:0048017	inositol lipid-mediated signaling	BP	156	11	0.0332764	1
GO:0016634	oxidoreductase activity, acting on the CH-CH group of donors, oxygen as acceptor	MF	9	2	0.0334263	1
GO:1901264	carbohydrate derivative transport	BP	64	5	0.034024	1
GO:0005815	microtubule organizing center	CC	667	32	0.0342144	1
GO:0002791	regulation of peptide secretion	BP	444	21	0.0345575	1
GO:0030286	dynein complex	CC	50	5	0.0345705	1
GO:0007416	synapse assembly	BP	150	11	0.034611	1
GO:0016021	integral component of membrane	CC	5156	163	0.0347249	1
GO:0038084	vascular endothelial growth factor signaling pathway	BP	30	4	0.034792	1
GO:0051781	positive regulation of cell division	BP	83	6	0.0350572	1
GO:0015145	monosaccharide transmembrane transporter activity	MF	24	3	0.0352223	1
GO:0018126	protein hydroxylation	BP	23	3	0.035225	1
GO:0006029	proteoglycan metabolic process	BP	83	7	0.0352452	1
GO:0030201	heparan sulfate proteoglycan metabolic process	BP	30	4	0.0352796	1
GO:0032330	regulation of chondrocyte differentiation	BP	45	5	0.0353544	1
GO:0003014	renal system process	BP	110	8	0.035514	1
GO:0086045	membrane depolarization during AV node cell action potential	BP	6	2	0.0356028	1
GO:0016119	carotene metabolic process	BP	2	1	0.0356065	1
GO:0010817	regulation of hormone levels	BP	482	23	0.0357912	1
GO:1901569	fatty acid derivative catabolic process	BP	10	2	0.0358221	1
GO:0021631	optic nerve morphogenesis	BP	6	2	0.0358486	1
GO:0048589	developmental growth	BP	596	31	0.036073	1
GO:1903037	regulation of leukocyte cell-cell adhesion	BP	337	16	0.03626	1
GO:0045105	intermediate filament polymerization or depolymerization	BP	2	1	0.0363979	1
GO:0032051	clathrin light chain binding	MF	7	2	0.036501	1
GO:0006812	cation transport	BP	1102	47	0.0367587	1
GO:0015370	solute:sodium symporter activity	MF	54	5	0.0367844	1
GO:0046348	amino sugar catabolic process	BP	12	2	0.0368291	1
GO:0003091	renal water homeostasis	BP	35	4	0.036968	1
GO:0050714	positive regulation of protein secretion	BP	233	12	0.0370972	1
GO:0034220	ion transmembrane transport	BP	1074	47	0.0371691	1
GO:0015785	UDP-galactose transport	BP	2	1	0.0372973	1
GO:0072334	UDP-galactose transmembrane transport	BP	2	1	0.0372973	1
GO:0005459	UDP-galactose transmembrane transporter activity	MF	2	1	0.0372973	1
GO:0046069	cGMP catabolic process	BP	6	2	0.0373208	1
GO:0042710	biofilm formation	BP	2	1	0.0373943	1
GO:0044010	single-species biofilm formation	BP	2	1	0.0373943	1
GO:0044407	single-species biofilm formation in or on host organism	BP	2	1	0.0373943	1
GO:1900190	regulation of single-species biofilm formation	BP	2	1	0.0373943	1
GO:1900191	negative regulation of single-species biofilm formation	BP	2	1	0.0373943	1
GO:1900228	regulation of single-species biofilm formation in or on host organism	BP	2	1	0.0373943	1
GO:1900229	negative regulation of single-species biofilm formation in or on host organism	BP	2	1	0.0373943	1
GO:0008967	phosphoglycolate phosphatase activity	MF	2	1	0.0376629	1
GO:0009299	mRNA transcription	BP	25	3	0.0378021	1
GO:0051339	regulation of lyase activity	BP	97	7	0.0378031	1
GO:1901017	negative regulation of potassium ion transmembrane transporter activity	BP	25	3	0.0378188	1
GO:0006766	vitamin metabolic process	BP	128	8	0.0381616	1
GO:0005891	voltage-gated calcium channel complex	CC	42	5	0.038282	1
GO:0021593	rhombomere morphogenesis	BP	1	1	0.038335	1
GO:0021594	rhombomere formation	BP	1	1	0.038335	1
GO:0021658	rhombomere 3 morphogenesis	BP	1	1	0.038335	1
GO:0021660	rhombomere 3 formation	BP	1	1	0.038335	1
GO:0021664	rhombomere 5 morphogenesis	BP	1	1	0.038335	1
GO:0021666	rhombomere 5 formation	BP	1	1	0.038335	1
GO:0032273	positive regulation of protein polymerization	BP	113	8	0.0383436	1
GO:0033961	cis-stilbene-oxide hydrolase activity	MF	1	1	0.0383738	1
GO:0060041	retina development in camera-type eye	BP	138	10	0.0384549	1
GO:0009109	coenzyme catabolic process	BP	12	2	0.0386843	1
GO:0030155	regulation of cell adhesion	BP	669	32	0.0387	1
GO:1903674	regulation of cap-dependent translational initiation	BP	1	1	0.0388117	1
GO:1903676	positive regulation of cap-dependent translational initiation	BP	1	1	0.0388117	1
GO:0070577	lysine-acetylated histone binding	MF	19	3	0.039102	1
GO:0140033	acetylation-dependent protein binding	MF	19	3	0.039102	1
GO:1901534	positive regulation of hematopoietic progenitor cell differentiation	BP	2	1	0.0391731	1
GO:0031279	regulation of cyclase activity	BP	96	7	0.0395258	1
GO:0086007	voltage-gated calcium channel activity involved in cardiac muscle cell action potential	MF	5	2	0.0396206	1
GO:0097166	lens epithelial cell proliferation	BP	2	1	0.0399001	1
GO:2001109	regulation of lens epithelial cell proliferation	BP	2	1	0.0399001	1
GO:2001111	positive regulation of lens epithelial cell proliferation	BP	2	1	0.0399001	1
GO:0032465	regulation of cytokinesis	BP	65	5	0.0400586	1
GO:0034765	regulation of ion transmembrane transport	BP	441	23	0.0403638	1
GO:0016048	detection of temperature stimulus	BP	19	3	0.0406278	1
GO:0045785	positive regulation of cell adhesion	BP	387	20	0.0406406	1
GO:0007155	cell adhesion	BP	1359	61	0.0408506	1
GO:0010705	meiotic DNA double-strand break processing involved in reciprocal meiotic recombination	BP	2	1	0.0409396	1
GO:0005005	transmembrane-ephrin receptor activity	MF	8	2	0.0410959	1
GO:0000724	double-strand break repair via homologous recombination	BP	104	7	0.0411951	1
GO:0032823	regulation of natural killer cell differentiation	BP	11	2	0.0412812	1
GO:0103053	1-ethyladenine demethylase activity	MF	2	1	0.0413005	1
GO:0045202	synapse	CC	836	44	0.0414709	1
GO:1905042	negative regulation of epithelium regeneration	BP	1	1	0.0415187	1
GO:0001808	negative regulation of type IV hypersensitivity	BP	2	1	0.0415727	1
GO:0051125	regulation of actin nucleation	BP	24	3	0.0416314	1
GO:0005730	nucleolus	CC	920	37	0.0418075	1
GO:0019935	cyclic-nucleotide-mediated signaling	BP	113	8	0.0418848	1
GO:2000344	positive regulation of acrosome reaction	BP	11	2	0.0420555	1
GO:0009152	purine ribonucleotide biosynthetic process	BP	257	13	0.0421636	1
GO:0006655	phosphatidylglycerol biosynthetic process	BP	9	2	0.0423519	1
GO:0033089	positive regulation of T cell differentiation in thymus	BP	10	2	0.0424337	1
GO:0017022	myosin binding	MF	59	5	0.0424733	1
GO:0000725	recombinational repair	BP	105	7	0.0425121	1
GO:0019799	tubulin N-acetyltransferase activity	MF	1	1	0.0425928	1
GO:1905953	negative regulation of lipid localization	BP	47	4	0.0427535	1
GO:0021697	cerebellar cortex formation	BP	19	3	0.0430572	1
GO:0032368	regulation of lipid transport	BP	108	7	0.0431127	1
GO:0008046	axon guidance receptor activity	MF	7	2	0.0431598	1
GO:0019471	4-hydroxyproline metabolic process	BP	12	2	0.0432129	1
GO:2000474	regulation of opioid receptor signaling pathway	BP	2	1	0.0433693	1
GO:0034199	activation of protein kinase A activity	BP	17	3	0.0433972	1
GO:1903673	mitotic cleavage furrow formation	BP	1	1	0.0434882	1
GO:0017101	aminoacyl-tRNA synthetase multienzyme complex	CC	12	2	0.0436427	1
GO:0007423	sensory organ development	BP	520	27	0.0436758	1
GO:0030175	filopodium	CC	96	8	0.043765	1
GO:0097435	supramolecular fiber organization	BP	571	29	0.0438181	1
GO:0031224	intrinsic component of membrane	CC	5286	166	0.0439651	1
GO:0032501	multicellular organismal process	BP	7193	239	0.0439981	1
GO:0032412	regulation of ion transmembrane transporter activity	BP	220	13	0.0441682	1
GO:1903034	regulation of response to wounding	BP	168	10	0.0442234	1
GO:0043204	perikaryon	CC	114	8	0.0442556	1
GO:0030801	positive regulation of cyclic nucleotide metabolic process	BP	112	7	0.0445931	1
GO:0016235	aggresome	CC	39	4	0.0446055	1
GO:0032304	negative regulation of icosanoid secretion	BP	3	1	0.0446479	1
GO:0061178	regulation of insulin secretion involved in cellular response to glucose stimulus	BP	52	5	0.0447993	1
GO:0030810	positive regulation of nucleotide biosynthetic process	BP	109	7	0.0448363	1
GO:1900373	positive regulation of purine nucleotide biosynthetic process	BP	109	7	0.0448363	1
GO:0002934	desmosome organization	BP	10	2	0.0449338	1
GO:0072520	seminiferous tubule development	BP	11	2	0.0449874	1
GO:0070539	linoleic acid binding	MF	1	1	0.0450434	1
GO:0002884	negative regulation of hypersensitivity	BP	3	1	0.0450923	1
GO:0030501	positive regulation of bone mineralization	BP	35	4	0.0450956	1
GO:1900108	negative regulation of nodal signaling pathway	BP	3	1	0.045124	1
GO:0014842	regulation of skeletal muscle satellite cell proliferation	BP	10	2	0.0452006	1
GO:0008643	carbohydrate transport	BP	153	9	0.0453441	1
GO:0044456	synapse part	CC	698	37	0.0455755	1
GO:0002002	regulation of angiotensin levels in blood	BP	13	2	0.0455874	1
GO:0060177	regulation of angiotensin metabolic process	BP	13	2	0.0455874	1
GO:0051495	positive regulation of cytoskeleton organization	BP	203	12	0.0457469	1
GO:0000170	sphingosine hydroxylase activity	MF	1	1	0.0458956	1
GO:0098662	inorganic cation transmembrane transport	BP	714	33	0.0462197	1
GO:0009743	response to carbohydrate	BP	211	12	0.0462389	1
GO:0006164	purine nucleotide biosynthetic process	BP	260	13	0.0465203	1
GO:0050870	positive regulation of T cell activation	BP	209	11	0.0465754	1
GO:0071476	cellular hypotonic response	BP	7	2	0.0467703	1
GO:0015749	monosaccharide transport	BP	126	8	0.0468052	1
GO:0050877	nervous system process	BP	1226	41	0.0469085	1
GO:0023061	signal release	BP	419	22	0.0470973	1
GO:0004873	asialoglycoprotein receptor activity	MF	2	1	0.0474893	1
GO:0010631	epithelial cell migration	BP	259	15	0.0475567	1
GO:0003130	BMP signaling pathway involved in heart induction	BP	2	1	0.0475722	1
GO:0003133	endodermal-mesodermal cell signaling	BP	2	1	0.0475722	1
GO:0003134	endodermal-mesodermal cell signaling involved in heart induction	BP	2	1	0.0475722	1
GO:2000355	negative regulation of ovarian follicle development	BP	2	1	0.0476404	1
GO:0005887	integral component of plasma membrane	CC	1593	62	0.0479755	1
GO:2000047	regulation of cell-cell adhesion mediated by cadherin	BP	11	2	0.0480122	1
GO:0070255	regulation of mucus secretion	BP	9	2	0.0482185	1
GO:0070161	anchoring junction	CC	523	29	0.048331	1
GO:0005575	cellular_component	CC	17790	519	0.0483809	1
GO:0048583	regulation of response to stimulus	BP	3915	141	0.0487282	1
GO:1901380	negative regulation of potassium ion transmembrane transport	BP	28	3	0.048863	1
GO:0001984	artery vasodilation involved in baroreceptor response to increased systemic arterial blood pressure	BP	1	1	0.0489014	1
GO:0008432	JUN kinase binding	MF	8	2	0.0489588	1
GO:0031226	intrinsic component of plasma membrane	CC	1652	64	0.0491934	1
GO:0021694	cerebellar Purkinje cell layer formation	BP	9	2	0.0492389	1
GO:0021702	cerebellar Purkinje cell differentiation	BP	9	2	0.0492389	1
GO:2000832	negative regulation of steroid hormone secretion	BP	2	1	0.0493256	1
GO:2000847	negative regulation of corticosteroid hormone secretion	BP	2	1	0.0493256	1
GO:2000850	negative regulation of glucocorticoid secretion	BP	2	1	0.0493256	1
GO:1904951	positive regulation of establishment of protein localization	BP	510	23	0.0495321	1

## Sheet: KEGG - Impulsivity
	Pathway	N genes in pathway	N genes p < 10-3 in pathway	p-value	FDR-adjusted p-value
path:hsa00592	alpha-Linolenic acid metabolism	25	4	0.00401902	0.637454
path:hsa05217	Basal cell carcinoma	63	7	0.0068424	0.637454
path:hsa04925	Aldosterone synthesis and secretion	96	10	0.00741055	0.637454
path:hsa04713	Circadian entrainment	96	10	0.00873924	0.637454
path:hsa01040	Biosynthesis of unsaturated fatty acids	27	4	0.013001	0.637454
path:hsa04371	Apelin signaling pathway	137	11	0.0146511	0.637454
path:hsa04934	Cushing syndrome	154	12	0.0174027	0.637454
path:hsa04927	Cortisol synthesis and secretion	64	7	0.0176482	0.637454
path:hsa04918	Thyroid hormone synthesis	74	7	0.0189673	0.637454
path:hsa05032	Morphine addiction	91	9	0.0193168	0.637454
path:hsa04725	Cholinergic synapse	112	10	0.0248646	0.73748
path:hsa04926	Relaxin signaling pathway	130	10	0.0268174	0.73748
path:hsa04724	Glutamatergic synapse	114	10	0.0308556	0.763372
path:hsa00230	Purine metabolism	129	9	0.0332829	0.763372
path:hsa04928	Parathyroid hormone synthesis, secretion and action	106	9	0.0365659	0.763372
path:hsa04916	Melanogenesis	101	8	0.0370584	0.763372
path:hsa04114	Oocyte meiosis	116	8	0.0393252	0.763372
path:hsa04914	Progesterone-mediated oocyte maturation	90	7	0.0467851	0.857727
