# Supplementary material for: Genome-Wide DNA Methylation Patterns in Persistent Attention-Deficit/Hyperactivity Disorder and in Association With Impulsive and Callous Traits
Source: Front Genet. 2020 Jan 31;11:16. doi: 10.3389/fgene.2020.00016 (PMC7005250; doi:10.3389/fgene.2020.00016)
Supplement: Supplementary file 6 [file Table_8.xlsx]

## Sheet: Sheet1
Timepoint	SNP	SNP Chr	SNP Pos	A1	A2	MAF	CpG	CpG Chr	CpG Pos	beta	t-stat	Effect Size	p-value
Adolescence	rs150430584	7	125458055	A	T	0.013	cg02183491	13	99100829	-1.01018	-5.89694	0.09337	5,37*10-9
Adolescence	rs11640522	16	82800368	T	C	0.266	cg02183491	13	99100829	0.0137	5.49958	0.0137	6.06*10-8
